# Supplementary material for: Rootstock microbiome as a target for manipulation to combat apple replant disease
Source: Sci Rep. 2025 Jul 2;15:23498. doi: 10.1038/s41598-025-05837-w (PMC12222655; doi:10.1038/s41598-025-05837-w)
Supplement: Supplementary file 1 — Supplementary Material 1 [file 41598_2025_5837_MOESM1_ESM.xlsx]

## Sheet: Table_S1
Table S1. Fungal taxa differentially represented between rootstock and tree microbioms. The values represent % of the reads in the group. Benjamini-Hochberg corrected P value of Welch’s test, we.eBH < 0.05. Genera level annotation.
Taxa	Root_stock_rel_aband_%	Tree_rel_aband_%	we.ep	we.eBH	wi.ep	wi.eBH
k__Fungi;p__Ascomycota;c__Dothideomycetes;o__Pleosporales;f__Pleosporales_fam_Incertae_sedis;g__Pteridiospora	0.0212074	52.7569	3.70765e-32	3.961e-30	1.05421e-18	1.23668e-16
k__Fungi;p__Ascomycota;c__Leotiomycetes;o__Helotiales;__;__	12.3243	12.4805	5.55651e-20	1.78443e-18	1.17775e-15	3.45966e-14
k__Fungi;p__Ascomycota;c__Leotiomycetes;o__Helotiales;f__Dermateaceae;g__Pezicula	0.00135883	3.77766	1.03446e-18	2.64675e-17	1.58214e-17	8.85589e-16
k__Fungi;p__Ascomycota;c__Eurotiomycetes;o__Chaetothyriales;f__Herpotrichiellaceae;g__Phialophora	0.00156912	3.22393	2.55139e-37	5.20477e-35	1.05538e-18	1.23668e-16
k__Fungi;p__Ascomycota;c__Sordariomycetes;o__Microascales;f__Halosphaeriaceae;g__Cirrenalia	0.000517648	3.04114	3.1854e-16	5.95267e-15	2.77917e-16	8.99917e-15
k__Fungi;p__Ascomycota;c__Sordariomycetes;o__Hypocreales;f__Nectriaceae;g__Dactylonectria	4.2547	1.72278	0.000229313	0.00118861	0.00281555	0.0110453
k__Fungi;p__Ascomycota;c__Sordariomycetes;o__Hypocreales;f__Bionectriaceae;g__Clonostachys	0.141156	1.62264	9.6452e-11	1.25549e-09	2.69671e-12	3.97675e-11
k__Fungi;p__Basidiomycota;c__Agaricomycetes;o__Auriculariales;f__Auriculariales_fam_Incertae_sedis;g__Oliveonia	0.478533	1.5087	2.45926e-05	0.000134833	3.17673e-06	2.09461e-05
k__Fungi;p__Ascomycota;c__Sordariomycetes;__;__;__	0.0745575	1.30531	9.08141e-10	8.79953e-09	4.71754e-13	7.89257e-12
k__Fungi;p__Ascomycota;c__Leotiomycetes;o__Helotiales;f__Hyaloscyphaceae;g__Lachnellula	0.000744119	1.30274	4.91579e-10	5.15599e-09	1.02235e-12	1.51448e-11
k__Fungi;p__Ascomycota;c__Sordariomycetes;o__Hypocreales;f__Nectriaceae;g__Ilyonectria	3.72931	1.12351	6.03015e-05	0.000360377	0.00375299	0.0142108
k__Fungi;p__Ascomycota;c__Eurotiomycetes;o__Chaetothyriales;f__Herpotrichiellaceae;g__Exophiala	0.152302	0.95411	1.82031e-30	1.6342e-28	1.22182e-18	1.23668e-16
k__Fungi;p__Ascomycota;c__Leotiomycetes;__;__;__	0.261153	0.836463	0.00685726	0.0243636	0.00108418	0.00464067
k__Fungi;p__Ascomycota;c__Leotiomycetes;o__Helotiales;f__Hyaloscyphaceae;g__Hyaloscypha	10.4697	0.777765	4.61497e-10	3.83005e-09	9.12619e-13	9.86786e-12
k__Fungi;p__Ascomycota;c__Sordariomycetes;o__Hypocreales;f__Hypocreaceae;g__Trichoderma	0.936069	0.770868	0.000168261	0.000895664	6.07913e-05	0.00033102
k__Fungi;p__Ascomycota;c__Dothideomycetes;o__Pleosporales;f__Amorosiaceae;g__Angustimassarina	0.000776472	0.76637	0.00793931	0.0243765	0.00489532	0.0148589
k__Fungi;p__Glomeromycota;c__Glomeromycetes;o__Glomerales;f__Glomeraceae;g__Rhizophagus	0.109741	0.492517	2.03813e-07	1.56832e-06	9.74715e-10	1.0716e-08
k__Fungi;p__Ascomycota;c__Sordariomycetes;o__Hypocreales;f__Nectriaceae;g__Fusarium	1.18323	0.404995	0.000100019	0.000565374	0.000360218	0.00171342
k__Fungi;p__Glomeromycota;c__Glomeromycetes;o__Glomerales;f__Glomeraceae;g__Glomus	0.00312206	0.282912	4.43448e-15	6.9766e-14	2.46603e-16	8.25672e-15
k__Fungi;p__Ascomycota;c__Dothideomycetes;o__Pleosporales;f__Lophiostomataceae;g__Lophiostoma	0.00457795	0.213383	1.48209e-05	7.9033e-05	2.16078e-07	1.52871e-06
k__Fungi;p__Ascomycota;c__Leotiomycetes;o__Helotiales;f__Helotiales_fam_Incertae_sedis;__	0.266912	0.21111	1.19305e-05	5.97989e-05	3.1129e-08	2.76398e-07
k__Fungi;p__Basidiomycota;c__Tremellomycetes;o__Cystofilobasidiales;f__Mrakiaceae;g__Mrakia	0.0467016	0.200671	5.83755e-14	9.96041e-13	3.58414e-13	6.0536e-12
k__Fungi;p__Ascomycota;c__Sordariomycetes;o__Sordariomycetes_ord_Incertae_sedis;f__Sordariomycetes_fam_Incertae_sedis;g__Oncopodiella	0.00803972	0.198885	1.36527e-13	2.17067e-12	1.25944e-14	2.76507e-13
k__Fungi;p__Basidiomycota;c__Tremellomycetes;o__Filobasidiales;f__Piskurozymaceae;g__Solicoccozyma	0.298651	0.197427	3.99201e-09	4.21486e-08	6.48854e-08	5.44821e-07
k__Fungi;p__Basidiomycota;__;__;__;__	0.00325148	0.189277	5.62889e-06	3.09717e-05	4.32934e-07	2.80022e-06
k__Fungi;p__Ascomycota;c__Dothideomycetes;o__Minutisphaerales;f__Minutisphaeraceae;g__Minutisphaera	6.4706e-05	0.181612	0.00592771	0.0202982	0.00434748	0.0137038
k__Fungi;p__Ascomycota;c__Sordariomycetes;o__Myrmecridiales;f__Myrmecridiales_fam_Incertae_sedis;g__Atractospora	0	0.163399	9.39799e-07	6.09518e-06	2.61691e-08	2.0579e-07
k__Fungi;p__Ascomycota;c__Dothideomycetes;o__Pleosporales;f__Phaeosphaeriaceae;g__Ophiosphaerella	4.85295e-05	0.159857	0.00293136	0.00936319	0.000723313	0.00263507
k__Fungi;p__Basidiomycota;c__Agaricomycetes;o__Agaricales;f__Mycenaceae;g__unidentified	0	0.154606	0.000898895	0.00341864	0.000893501	0.00297013
k__Fungi;p__Basidiomycota;c__Agaricomycetes;o__Cantharellales;f__Cantharellales_fam_Incertae_sedis;g__unidentified	3.2353e-05	0.152929	0.000275458	0.00121366	0.000111483	0.000473185
k__Fungi;p__Ascomycota;c__Dothideomycetes;o__Pleosporales;f__Phaeosphaeriaceae;g__Paraphoma	2.31565	0.152898	2.77608e-07	1.7491e-06	6.27996e-11	5.22273e-10
k__Fungi;p__Ascomycota;c__Leotiomycetes;o__Helotiales;f__Leotiaceae;g__Alatospora	0.0275971	0.144841	1.57424e-05	8.38718e-05	2.44198e-07	1.79325e-06
k__Fungi;p__Basidiomycota;c__Cystobasidiomycetes;o__Sakaguchiales;f__Sakaguchiaceae;g__Sakaguchia	0.00496619	0.140061	7.77849e-14	1.12998e-12	2.52275e-17	1.31468e-15
k__Fungi;p__Ascomycota;c__Sordariomycetes;o__Hypocreales;__;__	0	0.139669	6.12099e-09	5.18097e-08	1.88404e-11	2.24995e-10
k__Fungi;p__Ascomycota;c__Eurotiomycetes;o__Chaetothyriales;__;__	0	0.13655	5.20778e-14	8.02733e-13	2.97457e-15	6.62273e-14
k__Fungi;p__Ascomycota;c__Sordariomycetes;o__Microascales;f__Halosphaeriaceae;g__unidentified	0.00210295	0.128776	4.32488e-08	3.37098e-07	5.49186e-10	5.60106e-09
k__Fungi;p__Ascomycota;c__Eurotiomycetes;o__Eurotiales;f__Aspergillaceae;g__Penicillium	0.582111	0.12724	2.51225e-06	1.41902e-05	1.88985e-09	1.35935e-08
k__Fungi;p__Ascomycota;c__Leotiomycetes;o__Helotiales;f__Tricladiaceae;g__Spirosphaera	8.08825e-05	0.112036	0.00656544	0.0197551	0.00416819	0.0126384
k__Fungi;p__Ascomycota;c__Dothideomycetes;o__Pleosporales;f__Melanommataceae;g__Pleotrichocladium	0.290045	0.0981022	0.015308	0.0484585	0.00624339	0.0223374
k__Fungi;p__Mortierellomycota;c__Mortierellomycetes;o__Mortierellales;f__Mortierellaceae;g__Mortierella	0.387638	0.0947324	0.00108388	0.00476081	0.00115609	0.00489005
k__Fungi;p__Ascomycota;c__Leotiomycetes;o__Helotiales;f__Helotiaceae;g__Tetracladium	7.14571	0.0910177	1.62717e-15	2.99324e-14	1.22696e-12	1.29273e-11
k__Fungi;p__Basidiomycota;c__Microbotryomycetes;o__Leucosporidiales;f__Leucosporidiaceae;g__Mastigobasidium	0	0.0896384	1.54233e-08	1.25015e-07	7.64724e-11	8.49986e-10
k__Fungi;p__Ascomycota;c__Sordariomycetes;o__Sordariales;f__Chaetomiaceae;g__Humicola	0	0.0855632	3.85342e-43	1.34944e-40	1.05421e-18	1.23668e-16
k__Fungi;p__Ascomycota;c__Dothideomycetes;o__Pleosporales;f__Pleosporales_fam_Incertae_sedis;g__Aaosphaeria	0.00850884	0.081441	0.00033274	0.00122739	7.58176e-06	4.29872e-05
k__Fungi;p__Ascomycota;c__Saccharomycetes;o__Saccharomycetales;f__Phaffomycetaceae;g__Cyberlindnera	3.2353e-05	0.0793877	2.0689e-14	3.25363e-13	7.08249e-16	1.96637e-14
k__Fungi;p__Ascomycota;c__Sordariomycetes;o__Branch06;f__unidentified;g__unidentified	0	0.0790115	6.20324e-14	9.34247e-13	2.63503e-15	6.42887e-14
k__Fungi;p__Ascomycota;c__Eurotiomycetes;o__Chaetothyriales;f__Trichomeriaceae;g__Knufia	0.000404413	0.0677264	9.67602e-09	8.43907e-08	8.43987e-12	1.09581e-10
k__Fungi;p__Ascomycota;c__Leotiomycetes;o__Helotiales;f__Tricladiaceae;g__Halenospora	0	0.0658769	0.000122387	0.000602895	0.000188028	0.000785383
k__Fungi;p__Basidiomycota;c__Agaricomycetes;o__Sebacinales;f__Serendipitaceae;g__Serendipita	0.575754	0.0606889	4.38377e-06	2.42599e-05	8.70588e-07	4.94893e-06
k__Fungi;p__Ascomycota;c__Sordariomycetes;o__Hypocreales;f__Nectriaceae;__	0.0229221	0.0605949	3.84758e-14	5.74618e-13	1.16994e-13	2.17007e-12
k__Fungi;p__Glomeromycota;c__Glomeromycetes;o__Glomerales;f__Glomeraceae;g__Dominikia	0	0.0563316	5.72826e-05	0.000293537	4.51395e-05	0.000208701
k__Metazoa;p__Platyhelminthes;c__Trematoda;o__Plagiorchiida;f__Heterophyidae;g__Tetracladium	0.206008	0.0542783	1.16598e-15	2.48368e-14	1.68076e-09	1.81078e-08
k__Fungi;p__Basidiomycota;c__Classiculomycetes;o__Classiculales;f__unidentified;g__unidentified	3.2353e-05	0.0515041	4.34385e-10	4.15405e-09	5.87821e-14	9.74684e-13
k__Fungi;p__Ascomycota;c__Dothideomycetes;o__Pleosporales;f__Lentitheciaceae;__	0	0.0497329	1.5999e-10	1.69389e-09	1.01291e-14	2.11364e-13
k__Fungi;p__Mortierellomycota;c__Mortierellomycetes;o__Mortierellales;f__Mortierellaceae;g__Podila	0.0764502	0.0476797	0.00616235	0.0194704	0.00370029	0.0138256
k__Fungi;p__Glomeromycota;c__Glomeromycetes;o__Glomerales;f__Claroideoglomeraceae;g__Claroideoglomus	0	0.0473192	0.00378003	0.0127572	0.00165393	0.00580986
k__Fungi;p__Ascomycota;c__Dothideomycetes;o__Pleosporales;f__Pleosporaceae;g__Alternaria	0.288929	0.0462847	0.000382122	0.00169992	4.14929e-06	2.2233e-05
k__Fungi;p__Basidiomycota;c__Agaricomycetes;o__Agaricales;f__Entolomataceae;g__Entoloma	0.0802355	0.0439806	0.00165099	0.00613127	0.00170523	0.0058118
k__Fungi;p__Ascomycota;c__Dothideomycetes;o__Pleosporales;f__Didymosphaeriaceae;__	0.000630884	0.0424133	1.42841e-16	3.23155e-15	3.31557e-16	1.04878e-14
k__Fungi;p__Ascomycota;c__Eurotiomycetes;o__Chaetothyriales;f__unidentified;g__unidentified	0	0.0358773	3.52097e-09	3.12723e-08	1.90385e-11	2.40294e-10
k__Fungi;p__Ascomycota;c__Sordariomycetes;o__Hypocreales;f__Cordycipitaceae;g__Beauveria	0	0.0357989	0.00100713	0.00393754	0.000847866	0.00315879
k__Fungi;p__Basidiomycota;c__Agaricomycetes;o__Agaricales;f__Cyphellaceae;g__Limnoperdon	0	0.0355952	0.00573705	0.0190445	0.00885045	0.0264265
k__Fungi;p__Ascomycota;c__Dothideomycetes;o__Capnodiales;f__Cladosporiaceae;g__Cladosporium	2.83087	0.0319432	4.3068e-14	5.18735e-13	3.46945e-18	6.29437e-17
k__Fungi;p__Ascomycota;c__Sordariomycetes;o__Sordariales;f__Lasiosphaeriaceae;g__Schizothecium	0.00318677	0.030031	0.000426939	0.00178559	0.000193268	0.000815071
k__Fungi;p__Ascomycota;c__Sareomycetes;o__Sareales;f__unidentified;g__unidentified	0	0.0269903	3.18312e-06	1.95244e-05	3.1446e-07	2.00584e-06
k__Fungi;p__Glomeromycota;c__Glomeromycetes;o__Diversisporales;f__Diversisporaceae;g__Diversispora	0	0.0236517	0.0021452	0.00701063	0.000255179	0.00103873
k__Fungi;p__Basidiomycota;c__Tremellomycetes;o__Cystofilobasidiales;f__Mrakiaceae;g__unidentified	0	0.0219746	8.65767e-06	4.98388e-05	1.13082e-06	6.7211e-06
k__Fungi;p__Ascomycota;c__Dothideomycetes;o__Pleosporales;f__Leptosphaeriaceae;g__Plenodomus	0.354346	0.021959	1.2281e-06	7.25889e-06	1.13174e-08	7.44895e-08
k__Fungi;p__Ascomycota;c__Leotiomycetes;o__Helotiales;f__Mollisiaceae;g__Phialocephala	2.85214	0.0214574	2.7685e-11	2.49422e-10	0	0
k__Fungi;p__Ascomycota;c__Sordariomycetes;o__Microascales;f__Microascaceae;g__Scopulariopsis	0.00957649	0.0202505	0.0158171	0.0489929	0.0118248	0.0371022
k__Fungi;p__Ascomycota;c__Dothideomycetes;o__Pleosporales;f__Didymosphaeriaceae;g__Paraphaeosphaeria	0.0360898	0.0185891	2.77196e-06	1.61977e-05	2.6366e-09	2.60139e-08
k__Fungi;p__Ascomycota;c__Dothideomycetes;o__Pleosporales;f__Melanommataceae;g__Alpinaria	0.000776472	0.0178054	0.00317225	0.0104624	0.00238258	0.00772236
k__Fungi;p__Ascomycota;c__Dothideomycetes;o__Pleosporales;f__Occultibambusaceae;g__Brunneofusispora	0.000226471	0.0173352	1.66768e-08	1.41873e-07	4.60651e-11	5.41087e-10
k__Fungi;p__Ascomycota;c__Dothideomycetes;o__Pleosporales;f__Didymellaceae;g__Stagonosporopsis	0	0.0169434	0.000545882	0.00203748	9.71973e-05	0.000405806
k__Fungi;p__Basidiomycota;c__Microbotryomycetes;o__Kriegeriales;f__Camptobasidiaceae;g__unidentified	0	0.016818	0.0066778	0.0214088	0.0035947	0.0115037
k__Fungi;p__Ascomycota;c__Leotiomycetes;o__Helotiales;f__Helotiales_fam_Incertae_sedis;g__Mycoarthris	3.92744	0.0163791	9.50328e-10	7.4478e-09	1.68416e-12	1.72126e-11
k__Fungi;p__Ascomycota;c__Dothideomycetes;o__Botryosphaeriales;f__Botryosphaeriaceae;g__Diplodia	0	0.0157365	8.75472e-11	9.80857e-10	8.27358e-14	1.40311e-12
k__Fungi;p__Ascomycota;c__Dothideomycetes;o__Pleosporales;f__Torulaceae;g__Dendryphion	0.0180368	0.014702	2.17154e-06	1.25702e-05	5.23185e-09	5.02007e-08
k__Fungi;p__Ascomycota;c__Sordariomycetes;o__Hypocreales;f__Nectriaceae;g__Thelonectria	0	0.0143258	0.000595731	0.00187942	7.55085e-07	4.83844e-06
k__Fungi;p__Ascomycota;c__Eurotiomycetes;o__Chaetothyriales;f__Cyphellophoraceae;g__Cyphellophora	0	0.0142631	6.8067e-08	5.27753e-07	6.81447e-11	7.95167e-10
k__Fungi;p__Ascomycota;c__Sordariomycetes;o__Hypocreales;f__Clavicipitaceae;g__Metarhizium	0.00100294	0.0127741	2.00636e-06	1.25629e-05	8.3701e-09	7.37252e-08
k__Fungi;p__Ascomycota;c__Sordariomycetes;o__Xylariales;f__Xylariales_fam_Incertae_sedis;g__Fusidium	0	0.0122882	0.000838495	0.00326073	0.000374743	0.00131256
k__Fungi;p__Ascomycota;c__Dothideomycetes;o__Pleosporales;f__Melanommataceae;__	0.00362354	0.0121472	0.0108926	0.0338678	0.0123416	0.0361514
k__Fungi;p__Ascomycota;c__Dothideomycetes;o__Pleosporales;f__Cucurbitariaceae;g__Pyrenochaetopsis	0.00362354	0.0116143	3.9461e-05	0.000162439	1.48607e-07	1.09001e-06
k__Fungi;p__Ascomycota;c__Leotiomycetes;o__Helotiales;f__Tricladiaceae;g__Tricladium	0.000808825	0.0114262	0.000102593	0.000449411	8.50561e-06	4.21292e-05
k__Fungi;p__Ascomycota;c__Eurotiomycetes;o__Eurotiales;f__Aspergillaceae;g__Talaromyces	0.531641	0.0110657	3.00297e-10	2.39437e-09	2.46157e-15	3.8313e-14
k__Fungi;p__Ascomycota;c__Sordariomycetes;o__Xylariales;f__Bartaliniaceae;g__Truncatella	0.441473	0.0099842	0.00228773	0.00902878	0.000928444	0.00380221
k__Fungi;p__Ascomycota;c__Sordariomycetes;o__Sordariales;__;__	0.0155294	0.00952966	0.00606058	0.0200785	0.000420403	0.00180229
k__Fungi;p__Ascomycota;c__Sordariomycetes;o__Hypocreales;f__Clavicipitaceae;g__Metacordyceps	0.00190883	0.00915349	0.00191601	0.00650109	0.000257756	0.00109402
k__Fungi;p__Ascomycota;c__Dothideomycetes;o__Pleosporales;f__Didymellaceae;__	3.94375	0.0077742	1.37041e-12	1.29192e-11	0	0
k__Fungi;p__Basidiomycota;c__Microbotryomycetes;o__Leucosporidiales;f__Leucosporidiaceae;g__Leucosporidium	0.149439	0.00746072	0.000988693	0.00407923	0.000120446	0.000547387
k__Fungi;p__Ascomycota;c__Sordariomycetes;o__Sordariales;f__Chaetomiaceae;g__Trichocladium	0.00224853	0.00733533	0.000225147	0.000849804	6.51723e-07	4.33034e-06
k__Fungi;p__Ascomycota;c__Sordariomycetes;o__Hypocreales;f__Clavicipitaceae;g__Keithomyces	0.000485295	0.00731966	7.59183e-06	3.76416e-05	4.35759e-09	3.68299e-08
k__Fungi;p__Ascomycota;c__Dothideomycetes;o__Pleosporales;f__Lindgomycetaceae;g__Clohesyomyces	3.2353e-05	0.00578363	0.000534602	0.00189668	1.52624e-05	7.72168e-05
k__Fungi;p__Basidiomycota;c__Microbotryomycetes;o__Microbotryomycetes_ord_Incertae_sedis;f__Chrysozymaceae;g__Slooffia	0.0460383	0.00518802	6.99333e-07	4.04861e-06	1.6034e-09	1.11616e-08
k__Fungi;p__Ascomycota;c__Sordariomycetes;o__Hypocreales;f__Hypocreales_fam_Incertae_sedis;g__Emericellopsis	3.2353e-05	0.00504696	6.73019e-09	5.81968e-08	2.53029e-11	2.92029e-10
k__Fungi;p__Ascomycota;c__Sordariomycetes;o__Sordariales;f__Chaetomiaceae;__	0.0715648	0.00498426	0.00011396	0.000533791	7.85911e-06	4.03672e-05
k__Fungi;p__Mortierellomycota;c__Mortierellomycetes;o__Mortierellales;f__Mortierellaceae;g__Linnemannia	0.192986	0.00474916	2.56356e-06	1.42996e-05	1.15017e-08	7.54354e-08
k__Fungi;p__Ascomycota;c__Leotiomycetes;o__Thelebolales;f__Pseudeurotiaceae;g__Pseudogymnoascus	0.0182956	0.00427894	0.00301126	0.0101264	0.000214094	0.000934055
k__Fungi;p__Ascomycota;c__Eurotiomycetes;o__Onygenales;__;__	0	0.00374603	0.00693143	0.0215912	0.00401081	0.0126816
k__Fungi;p__Ascomycota;c__Dothideomycetes;o__Pleosporales;f__Periconiaceae;g__Periconia	0	0.00366767	0.0162217	0.046637	0.0101452	0.0287023
k__Rhizaria;p__Cercozoa;c__unidentified;o__unidentified;f__unidentified;g__unidentified	0.00305736	0.00360497	0.00036841	0.00135506	1.10784e-06	7.20591e-06
k__Fungi;p__Basidiomycota;c__Agaricomycetes;__;__;__	0.0523795	0.00338554	5.47831e-05	0.000248624	4.24733e-06	2.15119e-05
k__Fungi;p__Ascomycota;c__Dothideomycetes;o__Capnodiales;f__unidentified;g__unidentified	0	0.00338554	0.00288916	0.00985388	0.000741139	0.00272882
k__Fungi;p__Ascomycota;c__Saccharomycetes;o__Saccharomycetales;f__Saccharomycetaceae;g__Zygosaccharomyces	0	0.00321313	0.00319466	0.0104289	0.000572668	0.00211684
k__Fungi;p__Basidiomycota;c__Tremellomycetes;o__Filobasidiales;f__Filobasidiaceae;g__Filobasidium	0.173558	0.00302504	1.46793e-07	9.36849e-07	4.82686e-11	3.94635e-10
k__Fungi;p__Ascomycota;c__Dothideomycetes;o__Pleosporales;f__Didymosphaeriaceae;g__Kalmusia	0	0.00280561	0.00535732	0.0156984	0.000251939	0.000993797
k__Fungi;p__Ascomycota;c__Dothideomycetes;o__Pleosporales;f__Nigrogranaceae;g__Nigrograna	0	0.00277426	0.000734088	0.0027189	0.000120352	0.000522037
k__Rhizaria;p__Cercozoa;c__Cercozoa_cls_Incertae_sedis;o__Thaumatomonadida;f__Thaumatomastigidae;g__Thaumatomonas	0.000177942	0.00274291	0.00295048	0.0094796	0.000644168	0.00224666
k__Fungi;p__Chytridiomycota;c__Spizellomycetes;o__Spizellomycetales;f__unidentified;g__unidentified	0	0.00260185	0.01303	0.0378051	0.00741469	0.0214536
k__Fungi;p__Glomeromycota;c__Glomeromycetes;o__Glomerales;f__Glomeraceae;g__Rhizoglomus	0.0459898	0.00217866	0.0136652	0.0434489	0.0124809	0.0398582
k__Fungi;p__Ascomycota;c__Sordariomycetes;o__Chaetosphaeriales;f__Chaetosphaeriaceae;g__Chloridium	0.0282442	0.00217866	0.00731843	0.0247738	0.00108659	0.00427978
k__Fungi;p__Basidiomycota;c__Agaricomycetes;o__Polyporales;f__Ganodermataceae;g__Ganoderma	0.00127794	0.00206894	0.000885334	0.00289604	2.96525e-07	1.988e-06
k__Fungi;p__Ascomycota;c__Leotiomycetes;o__Helotiales;f__Dermateaceae;g__Davidhawksworthia	1.95181	0.00203759	1.34925e-07	8.46297e-07	8.18061e-07	4.57255e-06
k__Fungi;p__Basidiomycota;c__Microbotryomycetes;o__Sporidiobolales;f__Sporidiobolaceae;g__Sporobolomyces	0.144618	0.00192788	3.02674e-07	1.843e-06	1.5028e-09	1.06011e-08
k__Fungi;p__Basidiomycota;c__Agaricomycetes;o__Phallales;f__Phallaceae;g__Phallus	0	0.00192788	0.00338252	0.0111526	0.000680142	0.00261253
k__Fungi;p__Ascomycota;c__Sordariomycetes;o__Hypocreales;f__Hypocreales_fam_Incertae_sedis;g__Sarocladium	0.413358	0.00180249	2.50454e-11	2.22325e-10	5.68989e-16	9.85615e-15
k__Fungi;p__Basidiomycota;c__Agaricomycetes;o__Sebacinales;__;__	2.64199	0.00144199	3.81639e-17	6.26696e-16	0	0
k__Fungi;p__Ascomycota;c__Leotiomycetes;o__Helotiales;f__Discinellaceae;__	0.375845	0.000689647	0.000438937	0.00173268	0.00630902	0.0215435
k__Fungi;p__Basidiomycota;c__Tremellomycetes;o__Filobasidiales;f__Piskurozymaceae;g__Piskurozyma	0.164289	0.000673973	6.18088e-11	5.1511e-10	8.67362e-18	1.67137e-16
k__Fungi;p__Ascomycota;c__Sordariomycetes;o__Coniochaetales;f__Coniochaetaceae;g__Coniochaeta	2.04422	0.000642625	2.79811e-15	3.49097e-14	0	0
k__Fungi;p__Ascomycota;c__Leotiomycetes;o__Helotiales;f__Hyaloscyphaceae;__	4.24918	0.000626951	5.96745e-16	8.15985e-15	0	0
k__Fungi;p__Ascomycota;c__Sordariomycetes;o__Sordariales;f__Chaetomiaceae;g__Chaetomidium	0.0521207	0.000611278	0.000644368	0.00256562	0.000329837	0.00137401
k__Fungi;p__Ascomycota;c__Sordariomycetes;o__Hypocreales;f__Hypocreales_fam_Incertae_sedis;g__Acremonium	0.13378	0.000517235	2.91248e-08	1.9388e-07	2.0758e-10	1.52759e-09
k__Fungi;p__Ascomycota;c__Leotiomycetes;o__Helotiales;f__Sclerotiniaceae;g__Botrytis	0.358245	0.000485887	2.31862e-10	1.75724e-09	4.70388e-14	6.01978e-13
k__Fungi;p__Ascomycota;c__Sordariomycetes;o__Glomerellales;f__Plectosphaerellaceae;g__Acrostalagmus	0.177084	0.00045454	8.65758e-07	4.52279e-06	1.04319e-07	6.12107e-07
k__Fungi;p__Basidiomycota;c__Microbotryomycetes;o__Sporidiobolales;f__Sporidiobolaceae;g__Rhodotorula	0.109159	0.000407518	2.31518e-09	1.50812e-08	5.80438e-15	8.28415e-14
k__Fungi;p__Basidiomycota;c__Tremellomycetes;o__Tremellales;f__Bulleribasidiaceae;g__Vishniacozyma	0.314779	0.000376171	1.2752e-13	1.41306e-12	2.94903e-17	5.51362e-16
k__Fungi;p__Basidiomycota;c__Tremellomycetes;o__Cystofilobasidiales;f__Cystofilobasidiaceae;g__Cystofilobasidium	0.555728	0.000344823	1.97212e-08	1.18581e-07	2.70619e-12	2.56178e-11
k__Fungi;p__Ascomycota;c__Leotiomycetes;o__Helotiales;f__Helotiaceae;g__Scytalidium	2.51378	0.000282128	1.47139e-14	1.75899e-13	0	0
k__Fungi;p__Basidiomycota;c__Tremellomycetes;o__Tremellales;f__Cryptococcaceae;g__Cryptococcus	0.718884	0.000282128	4.82028e-14	5.52681e-13	0	0
k__Fungi;p__Ascomycota;c__Dothideomycetes;o__Pleosporales;f__Pleosporales_fam_Incertae_sedis;g__Berkleasmium	1.11619	0.000235107	1.47391e-12	1.47671e-11	1.82832e-11	1.5384e-10
k__Fungi;p__Basidiomycota;c__Agaricomycetes;o__Cantharellales;f__Hydnaceae;g__Sistotrema	1.05252	0.00012539	2.23606e-14	2.53648e-13	6.01949e-16	1.01355e-14
k__Fungi;p__Ascomycota;c__Dothideomycetes;o__Pleosporales;f__Phaeosphaeriaceae;g__Neosetophoma	0.0435795	0.00012539	0.00121585	0.00478794	0.000525564	0.00211965
k__Fungi;p__Ascomycota;c__Sordariomycetes;o__Sordariales;f__Chaetomiaceae;g__Arcopilus	0.084231	0.000109716	1.07497e-08	7.48567e-08	9.82913e-11	7.49336e-10
k__Fungi;p__Ascomycota;c__Leotiomycetes;o__Helotiales;f__Myxotrichaceae;g__Amorphotheca	0.408683	9.40427e-05	1.38552e-14	1.83633e-13	9.19403e-17	1.72313e-15
k__Fungi;p__Basidiomycota;c__Agaricomycetes;o__Trechisporales;f__Trechisporales_fam_Incertae_sedis;g__Sertulicium	0.896178	7.83689e-05	1.43122e-05	7.13309e-05	8.6287e-05	0.000388943
k__Fungi;p__Basidiomycota;c__Agaricomycetes;o__Hymenochaetales;f__unidentified;g__unidentified	0.11013	7.83689e-05	0.0132969	0.0419236	0.0259673	0.0779813
k__Fungi;p__Ascomycota;c__Dothideomycetes;o__Venturiales;f__Sympoventuriaceae;g__Pseudosigmoidea	0.0965252	7.83689e-05	1.04104e-10	8.43304e-10	5.13478e-16	8.78399e-15
k__Fungi;p__Ascomycota;c__Sordariomycetes;o__Sordariales;f__Cephalothecaceae;g__Phialemonium	0.718835	6.26951e-05	2.33916e-12	2.07517e-11	0	0
k__Fungi;p__Ascomycota;c__Sordariomycetes;o__Ophiostomatales;f__Ophiostomataceae;g__Sporothrix	0.472047	6.26951e-05	3.16798e-09	2.24552e-08	3.30684e-10	2.3759e-09
k__Fungi;p__Basidiomycota;c__Tremellomycetes;o__Filobasidiales;f__Filobasidiaceae;g__Naganishia	0.214355	6.26951e-05	6.79539e-12	6.11164e-11	0	0
k__Fungi;p__Ascomycota;c__Sordariomycetes;o__Ophiostomatales;f__Ophiostomataceae;g__Hawksworthiomyces	0.2343	3.13476e-05	4.7245e-11	3.81134e-10	3.33483e-13	3.51274e-12
k__Fungi;p__Ascomycota;c__Dothideomycetes;o__Dothideales;f__Dothideales_fam_Incertae_sedis;g__unidentified	0.211378	3.13476e-05	1.59068e-12	1.51572e-11	4.78784e-16	8.14452e-15
k__Fungi;p__Basidiomycota;c__Tremellomycetes;o__Cystofilobasidiales;f__Mrakiaceae;g__Itersonilia	0.183264	3.13476e-05	4.10486e-12	3.95004e-11	9.54098e-17	1.76642e-15
k__Fungi;p__Ascomycota;c__Saccharomycetes;o__Saccharomycetales;f__Lipomycetaceae;g__Dipodascopsis	0.106409	3.13476e-05	3.34875e-08	2.01769e-07	1.98242e-09	1.33792e-08
k__Fungi;p__Ascomycota;c__Leotiomycetes;o__Helotiales;f__Dermateaceae;g__Pyrenopeziza	0.0334854	3.13476e-05	0.0071607	0.0244102	0.0144073	0.045851
k__Fungi;p__Ascomycota;c__Sordariomycetes;o__Hypocreales;f__Niessliaceae;g__Eucasphaeria	0.0248148	3.13476e-05	0.00210745	0.00745952	0.00044957	0.00170833
k__Fungi;p__Ascomycota;c__Sordariomycetes;o__Sordariales;f__Chaetomiaceae;g__Dichotomopilus	0.687485	0	2.17233e-12	1.96219e-11	0	0
k__Fungi;p__Ascomycota;c__Sordariomycetes;o__Microascales;f__Microascaceae;g__Petriella	0.399365	0	1.53211e-14	2.19322e-13	0	0
k__Fungi;p__Ascomycota;c__Leotiomycetes;o__Helotiales;f__Hyaloscyphaceae;g__Glutinomyces	0.253195	0	1.12717e-09	8.82131e-09	6.54175e-08	3.8217e-07
k__Fungi;p__Ascomycota;c__Leotiomycetes;o__Thelebolales;f__Pseudeurotiaceae;g__unidentified	0.218075	0	4.65589e-11	4.12618e-10	1.4807e-12	1.42972e-11
k__Fungi;p__Ascomycota;c__Eurotiomycetes;o__Eurotiales;f__Aspergillaceae;g__Paecilomyces	0.215487	0	1.52933e-14	2.09005e-13	0	0
k__Fungi;p__Basidiomycota;c__Agaricomycetes;o__Sebacinales;f__unidentified;g__unidentified	0.19263	0	2.12552e-13	2.26965e-12	9.88792e-17	1.84982e-15
k__Fungi;p__Basidiomycota;c__Agaricomycetes;o__Cantharellales;f__Ceratobasidiaceae;g__Ceratobasidium	0.192565	0	0.000858523	0.00314694	0.00230008	0.00814816
k__Fungi;p__Basidiomycota;c__Tremellomycetes;o__Tremellales;f__Rhynchogastremataceae;g__Papiliotrema	0.163625	0	2.44941e-13	2.51265e-12	0	0
k__Fungi;p__Ascomycota;c__Leotiomycetes;o__Helotiales;f__Hyaloscyphaceae;g__Arachnopeziza	0.151833	0	7.39518e-11	6.07272e-10	5.57705e-12	4.9262e-11
k__Fungi;p__Ascomycota;c__Sordariomycetes;o__Hypocreales;f__Nectriaceae;g__Cylindrodendrum	0.125756	0	0.000164534	0.000700708	0.000472253	0.00184232
k__Fungi;p__Ascomycota;c__Pezizomycotina_cls_Incertae_sedis;o__Pezizomycotina_ord_Incertae_sedis;f__Pezizomycotina_fam_Incertae_sedis;g__Tricellula	0.1243	0	1.62097e-10	1.19548e-09	4.40273e-15	6.26905e-14
k__Fungi;p__Ascomycota;c__Saccharomycetes;o__Saccharomycetales;f__unidentified;g__unidentified	0.116147	0	4.0147e-07	2.32945e-06	8.59293e-09	5.59985e-08
k__Fungi;p__Ascomycota;c__Sordariomycetes;o__Pseudodactylariales;f__Pseudodactylariaceae;g__Pseudodactylaria	0.102785	0	2.73732e-10	2.10588e-09	2.89027e-11	2.41183e-10
k__Fungi;p__Basidiomycota;c__Agaricomycetes;o__Atheliales;f__Atheliaceae;g__Athelia	0.0959267	0	0.00140359	0.0052469	0.00502501	0.0173515
k__Fungi;p__Basidiomycota;c__Agaricomycetes;o__Cantharellales;__;__	0.093484	0	8.98118e-07	4.85568e-06	1.89468e-07	1.09495e-06
k__Fungi;p__Basidiomycota;c__Agaricomycetes;o__Sebacinales;f__Serendipitaceae;__	0.0888252	0	4.52267e-10	3.59783e-09	7.94144e-13	7.77656e-12
k__Fungi;p__Basidiomycota;c__Agaricomycetes;o__Agaricales;f__Psathyrellaceae;g__Coprinopsis	0.0852016	0	1.9071e-08	1.18049e-07	3.64181e-11	2.97919e-10
k__Fungi;p__Basidiomycota;c__Microbotryomycetes;o__Sporidiobolales;f__Sporidiobolaceae;g__Sporidiobolus	0.0758516	0	3.78307e-10	2.77137e-09	6.29011e-15	8.90762e-14
k__Fungi;p__Ascomycota;c__Sordariomycetes;o__Sordariales;f__Chaetomiaceae;g__Zopfiella	0.075334	0	2.27582e-09	1.50543e-08	7.6122e-12	6.5753e-11
k__Fungi;p__Ascomycota;c__Leotiomycetes;o__Helotiales;f__Helotiaceae;g__Meliniomyces	0.0734251	0	0.00210471	0.00782386	0.0096389	0.0318104
k__Fungi;p__Ascomycota;c__Dothideomycetes;o__Tubeufiales;f__Tubeufiaceae;g__Neohelicosporium	0.0696075	0	2.97248e-11	2.58593e-10	9.88272e-15	1.3337e-13
k__Fungi;p__Ascomycota;c__Leotiomycetes;o__Helotiales;f__Helotiaceae;g__Infundichalara	0.0622957	0	1.80923e-07	1.0733e-06	3.49262e-08	2.12161e-07
k__Fungi;p__Ascomycota;c__Sordariomycetes;o__Hypocreales;f__Hypocreaceae;g__Kiflimonium	0.0544663	0	0.000253009	0.0010564	7.02231e-05	0.000314844
k__Fungi;p__Basidiomycota;c__Cystobasidiomycetes;o__Cystobasidiales;f__Cystobasidiaceae;g__Occultifur	0.0434501	0	1.909e-09	1.34505e-08	2.77471e-13	3.00313e-12
k__Fungi;p__Basidiomycota;c__Agaricomycetes;o__Agaricales;f__Agaricales_fam_Incertae_sedis;g__Disporotrichum	0.043256	0	5.10371e-05	0.000233361	1.02303e-05	4.90556e-05
k__Fungi;p__Ascomycota;c__Orbiliomycetes;o__Orbiliales;f__Orbiliaceae;g__Dactylellina	0.0426898	0	1.26085e-05	5.68979e-05	7.9537e-07	4.21368e-06
k__Fungi;p__Ascomycota;c__Leotiomycetes;o__Helotiales;f__Myxotrichaceae;g__Oidiodendron	0.0419618	0	0.000101345	0.000449735	1.23051e-05	5.97185e-05
k__Fungi;p__Basidiomycota;c__Microbotryomycetes;__;__;__	0.0362354	0	2.25542e-06	1.17533e-05	1.00176e-08	6.36819e-08
k__Fungi;p__Basidiomycota;c__Cystobasidiomycetes;o__Cystobasidiales;f__Cystobasidiaceae;g__Cystobasidium	0.0357339	0	1.28041e-08	8.48853e-08	1.80587e-12	1.70091e-11
k__Fungi;p__Mucoromycota;c__Umbelopsidomycetes;o__Umbelopsidales;f__Umbelopsidaceae;g__Umbelopsis	0.0320942	0	0.000728309	0.00252896	0.000124894	0.000529808
k__Fungi;p__Basidiomycota;c__Microbotryomycetes;o__Microbotryomycetes_ord_Incertae_sedis;f__Microbotryomycetes_fam_Incertae_sedis;g__Curvibasidium	0.0317059	0	3.74919e-05	0.000151676	1.81503e-06	8.92275e-06
k__Fungi;p__Ascomycota;c__Lecanoromycetes;o__Ostropales;f__unidentified;g__unidentified	0.0305251	0	0.000327861	0.00131013	0.000155422	0.000655076
k__Fungi;p__Basidiomycota;c__Microbotryomycetes;o__Microbotryomycetes_ord_Incertae_sedis;f__Colacogloeaceae;g__Colacogloea	0.0294898	0	1.05515e-07	6.50724e-07	2.64499e-11	2.20397e-10
k__Fungi;p__Basidiomycota;c__Tremellomycetes;o__Tremellales;f__Tremellales_fam_Incertae_sedis;g__Cuniculitrema	0.0278236	0	0.0155989	0.0457112	0.0107951	0.0340385
k__Fungi;p__Basidiomycota;c__GS27;o__unidentified;f__unidentified;g__unidentified	0.0269662	0	8.49576e-05	0.000356831	1.28853e-05	6.00097e-05
k__Fungi;p__Ascomycota;c__Sordariomycetes;o__Hypocreales;f__Nectriaceae;g__Calonectria	0.0236015	0	0.00440769	0.015324	0.00279247	0.00991055
k__Fungi;p__Ascomycota;c__Saccharomycetes;o__Saccharomycetales;f__Debaryomycetaceae;g__Schwanniomyces	0.0218059	0	0.00077281	0.00297655	0.000262329	0.00106153
k__Fungi;p__Ascomycota;c__Orbiliomycetes;o__Orbiliales;f__Orbiliaceae;g__Monacrosporium	0.0211912	0	0.00279972	0.010183	0.00196007	0.00698481
k__Fungi;p__Basidiomycota;c__Cystobasidiomycetes;o__Cystobasidiomycetes_ord_Incertae_sedis;f__Symmetrosporaceae;g__Symmetrospora	0.0209	0	6.60028e-07	3.67769e-06	1.51402e-09	1.03277e-08
k__Fungi;p__Mortierellomycota;c__Mortierellomycetes;o__Mortierellales;f__Mortierellaceae;__	0.0197839	0	5.10247e-06	2.49151e-05	4.61116e-09	2.99599e-08
k__Fungi;p__Ascomycota;c__Eurotiomycetes;o__Chaetothyriales;f__Herpotrichiellaceae;g__Melanchlenus	0.0188618	0	0.000150415	0.000630806	6.79097e-06	3.33554e-05
k__Fungi;p__Mortierellomycota;c__Mortierellomycetes;o__Mortierellales;f__Mortierellaceae;g__Gryganskiella	0.015578	0	0.00478874	0.016115	0.00162778	0.00594142
k__Fungi;p__Ascomycota;c__Leotiomycetes;o__Helotiales;f__Calloriaceae;g__Polyphilus	0.015028	0	0.000139823	0.000593326	3.7099e-06	1.85955e-05
k__Fungi;p__Mucoromycota;c__Umbelopsidomycetes;__;__;__	0.0112588	0	0.00694155	0.0222763	0.00233345	0.00786018
k__Fungi;p__Basidiomycota;c__Tremellomycetes;__;__;__	0.0091559	0	0.00230056	0.00847964	0.000230478	0.000966521

## Sheet: Table_S2
Table S2. Bacterial taxa differentially represented between rootstock and tree microbioms. The values represent % of the reads in the group. Benjamini-Hochberg corrected P value of Welch’s test, we.eBH < 0.05. Genera level annotation.
Taxa	Root_stock_rel._aband_%	Tree_rel_aband_%	we.ep	we.eBH	wi.ep	wi.eBH
d__Bacteria;p__Actinobacteriota;c__Actinobacteria;o__Streptomycetales;f__Streptomycetaceae;g__Streptomyces	6.8072	7.49564	0.0030556	0.0104822	0.0316909	0.0903539
d__Bacteria;p__Bacteroidota;c__Bacteroidia;o__Chitinophagales;f__Chitinophagaceae;g__Niastella	0.850143	4.36162	1.16021e-18	1.22268e-17	9.97176e-16	1.22711e-14
d__Bacteria;p__Actinobacteriota;c__Actinobacteria;o__Kineosporiales;f__Kineosporiaceae;g__Kineosporia	0.12867	4.33972	2.37059e-28	5.40911e-27	8.48471e-18	2.18861e-16
d__Bacteria;p__Proteobacteria;c__Alphaproteobacteria;o__Rhizobiales;f__Xanthobacteraceae;g__Bradyrhizobium	0.579459	3.14912	4.1876e-15	3.53117e-14	3.93983e-15	3.9682e-14
d__Bacteria;p__Bacteroidota;c__Bacteroidia;o__Chitinophagales;f__Chitinophagaceae;__	2.27431	3.01784	0.00197361	0.00691416	4.94809e-05	0.000190781
d__Bacteria;p__Proteobacteria;c__Gammaproteobacteria;o__Steroidobacterales;f__Steroidobacteraceae;g__Steroidobacter	0.672632	2.96498	1.74459e-15	1.37821e-14	7.47273e-15	7.1277e-14
d__Bacteria;p__Proteobacteria;c__Alphaproteobacteria;o__Rhizobiales;f__Rhizobiaceae;g__Allorhizobium-Neorhizobium-Pararhizobium-Rhizobium	12.7938	2.65978	3.90096e-13	6.62726e-12	8.4429e-15	9.22365e-14
d__Bacteria;p__Proteobacteria;c__Gammaproteobacteria;o__Xanthomonadales;f__Rhodanobacteraceae;__	0.693819	2.52751	1.54643e-15	1.31793e-14	2.3449e-14	2.03972e-13
d__Bacteria;p__Actinobacteriota;c__Acidimicrobiia;o__IMCC26256;f__IMCC26256;g__IMCC26256	0.0765763	2.36465	2.76123e-22	3.66331e-21	3.81058e-17	6.95317e-16
d__Bacteria;p__Myxococcota;c__Polyangia;o__Polyangiales;f__Sandaracinaceae;g__uncultured	0.0431166	2.33619	1.87606e-30	5.34036e-29	2.00616e-17	4.16426e-16
d__Bacteria;p__Proteobacteria;c__Alphaproteobacteria;o__Dongiales;f__Dongiaceae;g__Dongia	0.562802	1.98103	4.02567e-13	2.97527e-12	2.50661e-13	1.91262e-12
d__Bacteria;p__Actinobacteriota;c__Actinobacteria;o__Micromonosporales;f__Micromonosporaceae;__	0.0484496	1.71519	3.14826e-27	6.53584e-26	4.79236e-18	1.55012e-16
d__Bacteria;p__Actinobacteriota;c__Actinobacteria;o__Micromonosporales;f__Micromonosporaceae;g__Actinoplanes	0.152864	1.69497	1.22616e-17	1.08142e-16	2.97703e-15	3.1294e-14
d__Bacteria;p__Actinobacteriota;c__Actinobacteria;o__Streptosporangiales;f__Thermomonosporaceae;__	0.000247087	1.58772	9.21018e-05	0.000322073	4.22691e-07	1.85779e-06
d__Bacteria;p__Myxococcota;c__Polyangia;o__Haliangiales;f__Haliangiaceae;g__Haliangium	0.155665	1.57567	1.24586e-20	1.46886e-19	2.75697e-18	1.13287e-16
d__Bacteria;p__Proteobacteria;c__Gammaproteobacteria;o__Gammaproteobacteria_Incertae_Sedis;f__Unknown_Family;g__Acidibacter	0.269798	1.48222	2.82734e-22	3.9772e-21	1.24317e-18	8.11163e-17
d__Bacteria;p__Actinobacteriota;c__Actinobacteria;o__Corynebacteriales;f__Mycobacteriaceae;g__Mycobacterium	0.720422	1.42463	1.84235e-10	1.16636e-09	2.89848e-10	1.72794e-09
d__Bacteria;p__Actinobacteriota;c__Actinobacteria;o__Streptosporangiales;f__Streptosporangiaceae;g__Nonomuraea	0.000308858	1.3051	5.94156e-15	4.25836e-14	4.248e-17	7.55597e-16
d__Bacteria;p__Actinobacteriota;c__Actinobacteria;o__Frankiales;f__Cryptosporangiaceae;g__Cryptosporangium	0.0559239	1.21165	9.36585e-27	1.95708e-25	4.96166e-18	1.58877e-16
d__Bacteria;p__Proteobacteria;c__Gammaproteobacteria;o__Burkholderiales;f__Comamonadaceae;__	2.41233	1.19739	1.29466e-05	5.85396e-05	1.79925e-05	6.93806e-05
d__Bacteria;p__Proteobacteria;c__Alphaproteobacteria;o__Rhizobiales;f__Xanthobacteraceae;__	2.59239	1.13636	8.95357e-09	4.93781e-08	1.30785e-09	7.36254e-09
d__Bacteria;p__Proteobacteria;c__Alphaproteobacteria;o__Rhizobiales;f__Xanthobacteraceae;g__uncultured	0.0427872	1.07908	9.79291e-26	1.72548e-24	1.27857e-18	8.09684e-17
d__Bacteria;p__Proteobacteria;c__Alphaproteobacteria;o__Sphingomonadales;f__Sphingomonadaceae;g__Sphingomonas	1.20012	1.0015	8.53406e-08	5.11852e-07	2.12583e-08	1.06795e-07
d__Bacteria;p__Proteobacteria;c__Alphaproteobacteria;o__Rhizobiales;f__Rhizobiales_Incertae_Sedis;g__uncultured	0.173887	0.965036	9.63945e-12	6.15284e-11	1.06829e-11	7.0279e-11
d__Bacteria;p__Proteobacteria;c__Alphaproteobacteria;o__Sphingomonadales;f__Sphingomonadaceae;g__Novosphingobium	2.42281	0.962747	6.0957e-08	3.75925e-07	4.77112e-08	2.3311e-07
d__Bacteria;p__Bacteroidota;c__Bacteroidia;o__Chitinophagales;f__Chitinophagaceae;g__Puia	1.16234	0.852978	0.0154406	0.0478929	0.0441892	0.120299
d__Bacteria;p__Proteobacteria;c__Gammaproteobacteria;__;__;__	0.0412429	0.776697	5.24957e-14	3.90474e-13	1.43706e-14	1.28661e-13
d__Bacteria;p__Actinobacteriota;c__Thermoleophilia;o__Solirubrobacterales;f__67-14;g__67-14	0.0623688	0.772273	7.99517e-09	3.95784e-08	3.2096e-15	3.2631e-14
d__Bacteria;p__Proteobacteria;c__Alphaproteobacteria;o__Rhizobiales;f__Labraceae;g__Labrys	0.198719	0.72597	6.9133e-27	1.48357e-25	8.65524e-18	2.22248e-16
d__Bacteria;p__Actinobacteriota;c__Thermoleophilia;o__Gaiellales;f__uncultured;g__uncultured	0.117304	0.721469	3.41131e-20	3.98158e-19	7.4383e-18	2.00753e-16
d__Bacteria;p__Actinobacteriota;c__Actinobacteria;o__Propionibacteriales;f__Nocardioidaceae;g__Nocardioides	0.117119	0.718037	4.47364e-14	3.34885e-13	4.50548e-15	4.44388e-14
d__Bacteria;p__Acidobacteriota;c__Vicinamibacteria;o__Vicinamibacterales;f__uncultured;g__uncultured	0.014331	0.709417	1.65741e-36	9.8562e-35	1.83441e-18	9.29246e-17
d__Bacteria;p__Actinobacteriota;c__Acidimicrobiia;o__Microtrichales;__;__	0.012272	0.684091	3.19189e-37	2.04344e-35	1.77543e-18	9.1059e-17
d__Bacteria;p__Actinobacteriota;c__Thermoleophilia;o__Solirubrobacterales;f__Solirubrobacteraceae;g__Conexibacter	0.0941606	0.675548	1.89086e-16	1.47462e-15	2.93727e-17	5.5211e-16
d__Bacteria;p__Actinobacteriota;c__Acidimicrobiia;o__Microtrichales;f__Iamiaceae;g__Iamia	0.00407693	0.636416	1.03092e-05	4.12825e-05	8.34479e-08	3.95845e-07
d__Bacteria;p__Proteobacteria;c__Gammaproteobacteria;o__Burkholderiales;f__Burkholderiaceae;g__Burkholderia-Caballeronia-Paraburkholderia	2.42903	0.610556	8.74317e-08	4.78639e-07	1.17285e-14	1.24967e-13
d__Bacteria;p__Proteobacteria;c__Alphaproteobacteria;o__Rhizobiales;f__Rhizobiaceae;__	1.63122	0.607963	2.3242e-05	9.40055e-05	2.47557e-09	1.3471e-08
d__Bacteria;p__Proteobacteria;c__Alphaproteobacteria;o__Caulobacterales;f__Caulobacteraceae;g__Caulobacter	2.26426	0.592401	3.12973e-11	3.08126e-10	1.99528e-13	1.76132e-12
d__Bacteria;p__Actinobacteriota;c__Acidimicrobiia;__;__;__	0.000247087	0.542284	7.42202e-38	5.22229e-36	1.18624e-18	8.14348e-17
d__Bacteria;p__Actinobacteriota;c__Actinobacteria;o__Streptosporangiales;f__Thermomonosporaceae;g__Actinocorallia	8.23622e-05	0.542208	4.98796e-51	2.41738e-48	1.05421e-18	8.08156e-17
d__Bacteria;p__Bacteroidota;c__Bacteroidia;o__Chitinophagales;f__Chitinophagaceae;g__Terrimonas	0.268645	0.535724	0.00135616	0.00441083	1.15685e-06	5.2872e-06
d__Bacteria;p__Actinobacteriota;c__Actinobacteria;o__Pseudonocardiales;f__Pseudonocardiaceae;g__Pseudonocardia	0.0121072	0.519705	2.35189e-30	6.68951e-29	2.91615e-18	1.15764e-16
d__Bacteria;p__Bacteroidota;c__Bacteroidia;o__Cytophagales;f__Microscillaceae;g__Chryseolinea	0.210477	0.439915	0.0105045	0.0309943	3.46291e-05	0.000136268
d__Bacteria;p__Proteobacteria;c__Alphaproteobacteria;o__Rhizobiales;f__Xanthobacteraceae;g__Pseudolabrys	0.101779	0.410775	1.10225e-22	1.41308e-21	8.9653e-18	2.2553e-16
d__Bacteria;p__Proteobacteria;c__Gammaproteobacteria;o__JG36-TzT-191;f__JG36-TzT-191;g__JG36-TzT-191	0.0104806	0.402613	9.25069e-08	4.19833e-07	3.84141e-13	2.81758e-12
d__Bacteria;p__Acidobacteriota;c__Thermoanaerobaculia;o__Thermoanaerobaculales;f__Thermoanaerobaculaceae;g__Subgroup_10	0.0199317	0.375228	2.17831e-14	1.55686e-13	3.62224e-17	6.72289e-16
d__Bacteria;p__Myxococcota;c__Polyangia;o__Polyangiales;f__BIrii41;g__BIrii41	0.342977	0.35898	6.05743e-10	3.60712e-09	5.22748e-08	2.65043e-07
d__Bacteria;p__Proteobacteria;c__Alphaproteobacteria;o__Rhizobiales;f__Rhodomicrobiaceae;g__Rhodomicrobium	0.00181197	0.356921	1.13489e-08	5.48531e-08	2.68134e-15	2.50662e-14
d__Bacteria;p__Proteobacteria;c__Gammaproteobacteria;o__Steroidobacterales;f__Steroidobacteraceae;g__uncultured	0.00172961	0.34525	2.0983e-16	1.72749e-15	1.6484e-17	3.48214e-16
d__Bacteria;p__Actinobacteriota;c__Thermoleophilia;o__Solirubrobacterales;f__Solirubrobacteraceae;__	0.0617923	0.340444	8.84541e-06	3.41933e-05	8.62639e-12	5.57506e-11
d__Bacteria;p__Actinobacteriota;c__Acidimicrobiia;o__Microtrichales;f__Ilumatobacteraceae;g__CL500-29_marine_group	0.0294857	0.325569	6.71505e-14	4.73083e-13	3.00212e-16	3.99419e-15
d__Bacteria;p__Actinobacteriota;c__Actinobacteria;o__Corynebacteriales;f__Nocardiaceae;g__Nocardia	0.0196228	0.31405	4.26315e-09	2.25834e-08	1.51446e-12	1.0414e-11
d__Bacteria;p__Bacteroidota;c__Bacteroidia;o__Sphingobacteriales;f__Sphingobacteriaceae;g__Mucilaginibacter	1.39888	0.306651	1.18004e-06	5.09362e-06	1.88911e-15	2.32113e-14
d__Bacteria;p__Actinobacteriota;c__Actinobacteria;o__Micromonosporales;f__Micromonosporaceae;g__Dactylosporangium	0.00345921	0.278503	1.17892e-09	6.57004e-09	3.6422e-14	2.81412e-13
d__Bacteria;p__Gemmatimonadota;c__Gemmatimonadetes;o__Gemmatimonadales;f__Gemmatimonadaceae;g__uncultured	0.0082774	0.274079	1.19805e-28	2.95389e-27	1.10121e-18	8.08156e-17
d__Bacteria;p__Proteobacteria;c__Alphaproteobacteria;o__Rhizobiales;f__Xanthobacteraceae;g__Rhodoplanes	0.00753614	0.261798	1.02652e-23	1.59893e-22	1.20162e-17	2.79362e-16
d__Bacteria;p__Actinobacteriota;c__Actinobacteria;o__Micrococcales;f__Microbacteriaceae;__	0.906334	0.254475	1.31754e-06	6.06106e-06	3.17107e-15	3.65435e-14
d__Bacteria;p__Myxococcota;c__Polyangia;o__Polyangiales;f__Phaselicystidaceae;g__Phaselicystis	0.0602274	0.253712	2.2629e-05	8.36393e-05	7.43614e-12	4.91567e-11
d__Bacteria;p__Bacteroidota;c__Bacteroidia;o__Chitinophagales;f__Chitinophagaceae;g__uncultured	0.0232261	0.250584	6.341e-07	2.96723e-06	2.72571e-07	1.29555e-06
d__Bacteria;p__Actinobacteriota;c__Thermoleophilia;o__Gaiellales;f__Gaiellaceae;g__Gaiella	0.00792736	0.246007	6.76004e-31	1.85965e-29	1.08788e-18	8.08156e-17
d__Bacteria;p__Actinobacteriota;c__Thermoleophilia;o__Solirubrobacterales;f__Solirubrobacteraceae;g__Solirubrobacter	0.0303505	0.237006	2.00769e-12	1.33389e-11	4.967e-12	3.16978e-11
d__Bacteria;p__Proteobacteria;c__Alphaproteobacteria;o__Rhizobiales;f__Xanthobacteraceae;g__Pseudorhodoplanes	0.0548738	0.234718	0.000694363	0.0023289	4.19137e-08	2.12086e-07
d__Bacteria;p__Gemmatimonadota;c__Gemmatimonadetes;o__Gemmatimonadales;f__Gemmatimonadaceae;g__Gemmatimonas	0.00312976	0.231743	6.5542e-09	3.23137e-08	1.25459e-15	1.39719e-14
d__Bacteria;p__Actinobacteriota;c__Actinobacteria;o__Frankiales;__;__	0.0127661	0.227242	0.00250834	0.00760658	0.0024528	0.0070086
d__Bacteria;p__Proteobacteria;c__Alphaproteobacteria;o__Sphingomonadales;f__Sphingomonadaceae;__	1.44651	0.226098	0.000128705	0.000518399	0.000253098	0.000900558
d__Bacteria;p__Acidobacteriota;c__Acidobacteriae;o__Acidobacteriales;f__uncultured;g__uncultured	0.00315035	0.21641	9.47155e-14	6.69299e-13	2.01588e-15	2.0485e-14
d__Bacteria;p__Proteobacteria;c__Gammaproteobacteria;o__Burkholderiales;f__Methylophilaceae;g__Methylotenera	0.00111189	0.199552	9.16073e-09	4.80371e-08	4.43288e-13	3.19068e-12
d__Bacteria;p__Proteobacteria;c__Alphaproteobacteria;o__Rhizobiales;f__Rhizobiales_Incertae_Sedis;g__Nordella	0.0132191	0.198255	1.58858e-11	9.81207e-11	2.11634e-16	2.93087e-15
d__Bacteria;p__Proteobacteria;c__Alphaproteobacteria;o__Rhizobiales;f__A0839;g__A0839	0.0162459	0.196501	3.00433e-11	1.81858e-10	1.65706e-14	1.43338e-13
d__Bacteria;p__Actinobacteriota;c__Actinobacteria;o__Pseudonocardiales;f__Pseudonocardiaceae;g__Amycolatopsis	0.0513322	0.192534	0.00106747	0.00343099	1.8635e-05	7.28467e-05
d__Bacteria;p__Proteobacteria;c__Gammaproteobacteria;o__Burkholderiales;__;__	0.00926575	0.190017	1.0859e-09	5.9187e-09	2.9407e-13	2.17682e-12
d__Bacteria;p__Bacteroidota;c__Bacteroidia;o__Flavobacteriales;f__Flavobacteriaceae;g__Flavobacterium	3.18464	0.189635	5.08384e-11	4.19304e-10	0	0
d__Bacteria;p__Actinobacteriota;c__Acidimicrobiia;o__uncultured;f__uncultured;g__uncultured	0.00168843	0.189407	2.26761e-18	2.08802e-17	3.61314e-17	6.03913e-16
d__Bacteria;p__Actinobacteriota;c__Thermoleophilia;o__Solirubrobacterales;__;__	0.00463287	0.187728	0.000589738	0.00187539	3.60565e-05	0.000126993
d__Bacteria;p__Actinobacteriota;c__Actinobacteria;o__Micromonosporales;f__Micromonosporaceae;g__Luedemannella	0.00525059	0.187271	7.70104e-11	4.33213e-10	1.02998e-14	8.484e-14
d__Bacteria;p__NB1-j;c__NB1-j;o__NB1-j;f__NB1-j;g__NB1-j	0.000247087	0.187194	1.01533e-10	5.76623e-10	2.48754e-14	1.9969e-13
d__Bacteria;p__Acidobacteriota;c__Vicinamibacteria;o__Vicinamibacterales;f__Vicinamibacteraceae;g__uncultured	0.00137957	0.186966	3.84289e-06	1.62542e-05	3.0075e-08	1.41287e-07
d__Bacteria;p__Actinobacteriota;c__Actinobacteria;o__Catenulisporales;f__Actinospicaceae;g__Actinospica	0.0251617	0.186661	0.000471836	0.00158425	5.55306e-06	2.3191e-05
d__Bacteria;p__Proteobacteria;c__Alphaproteobacteria;o__Caulobacterales;f__Caulobacteraceae;g__uncultured	0.181197	0.183609	0.00122343	0.00430813	5.61076e-05	0.000200166
d__Bacteria;p__Proteobacteria;c__Gammaproteobacteria;o__Pseudomonadales;f__Pseudomonadaceae;g__Pseudomonas	6.69901	0.181473	2.00728e-13	2.31568e-12	0	0
d__Bacteria;p__Proteobacteria;c__Alphaproteobacteria;o__Reyranellales;f__Reyranellaceae;g__Reyranella	0.0662192	0.180634	4.37185e-13	2.95911e-12	1.59368e-13	1.20825e-12
d__Bacteria;p__Proteobacteria;c__Alphaproteobacteria;o__Sphingomonadales;f__Sphingomonadaceae;g__Sphingobium	7.85056	0.177812	7.65013e-16	1.8597e-14	0	0
d__Bacteria;p__Proteobacteria;c__Alphaproteobacteria;o__Rhizobiales;f__Hyphomicrobiaceae;g__Hyphomicrobium	0.116357	0.176057	0.000212324	0.000797089	0.000536248	0.00175665
d__Bacteria;p__Proteobacteria;c__Gammaproteobacteria;o__Xanthomonadales;f__Xanthomonadaceae;g__Pseudoxanthomonas	0.00310917	0.168811	0.00736062	0.0224632	0.00137105	0.00437566
d__Bacteria;p__Actinobacteriota;c__Actinobacteria;o__Frankiales;f__Sporichthyaceae;g__uncultured	0.0912367	0.166827	0.000946338	0.00307822	3.16093e-05	0.000115169
d__Bacteria;p__Actinobacteriota;c__MB-A2-108;o__MB-A2-108;f__MB-A2-108;g__MB-A2-108	0.000164724	0.166599	9.47921e-09	4.73322e-08	7.04002e-13	4.69063e-12
d__Bacteria;p__Actinobacteriota;c__Actinobacteria;o__Micromonosporales;f__Micromonosporaceae;g__Virgisporangium	0	0.165302	9.74204e-09	5.01127e-08	3.4838e-11	2.13712e-10
d__Bacteria;p__Actinobacteriota;c__Actinobacteria;o__Frankiales;f__Nakamurellaceae;g__Nakamurella	0.0360129	0.161411	7.07548e-07	3.04117e-06	1.81294e-13	1.36546e-12
d__Bacteria;p__Firmicutes;c__Bacilli;o__Entomoplasmatales;f__type_III;g__type_III	0.000144134	0.156529	0.000110905	0.000415671	7.88172e-06	3.05953e-05
d__Bacteria;p__Verrucomicrobiota;c__Verrucomicrobiae;o__Chthoniobacterales;f__Chthoniobacteraceae;g__Candidatus_Udaeobacter	0.00770087	0.155767	8.21812e-36	3.84484e-34	1.16836e-18	8.09457e-17
d__Bacteria;p__Proteobacteria;c__Alphaproteobacteria;o__uncultured;f__uncultured;g__uncultured	0.030927	0.141273	4.26226e-07	1.99204e-06	9.95587e-16	1.17611e-14
d__Bacteria;p__Proteobacteria;c__Alphaproteobacteria;o__Rhizobiales;f__Methyloligellaceae;g__uncultured	0.0248322	0.141273	1.85365e-06	7.92078e-06	2.31826e-10	1.33387e-09
d__Bacteria;p__Proteobacteria;c__Gammaproteobacteria;o__Burkholderiales;f__Oxalobacteraceae;__	1.81259	0.127619	1.63621e-12	1.91054e-11	0	0
d__Bacteria;p__Proteobacteria;c__Alphaproteobacteria;__;__;__	0.300704	0.126246	1.05073e-07	5.40049e-07	1.09512e-11	7.34786e-11
d__Bacteria;p__Acidobacteriota;c__Vicinamibacteria;o__Vicinamibacterales;f__Vicinamibacteraceae;g__Vicinamibacteraceae	0.00922457	0.126246	3.03131e-11	1.8113e-10	5.27598e-15	4.68881e-14
d__Bacteria;p__Proteobacteria;c__Gammaproteobacteria;o__Diplorickettsiales;f__Diplorickettsiaceae;g__Aquicella	0.00949225	0.123652	0.000795224	0.00264014	0.000216768	0.000730582
d__Bacteria;p__Actinobacteriota;c__Actinobacteria;o__Frankiales;f__Frankiaceae;g__Jatrophihabitans	1.1786	0.122432	1.41569e-07	7.51417e-07	5.44009e-15	6.13407e-14
d__Bacteria;p__Bacteroidota;c__Bacteroidia;o__Chitinophagales;f__Chitinophagaceae;g__Ferruginibacter	0.975622	0.121821	4.2628e-08	2.27619e-07	1.9082e-17	2.7618e-16
d__Bacteria;p__Actinobacteriota;c__Actinobacteria;o__Propionibacteriales;f__Nocardioidaceae;g__Kribbella	0.0189639	0.114727	0.000516322	0.00171872	1.15642e-05	4.39439e-05
d__Bacteria;p__Acidobacteriota;c__Vicinamibacteria;o__Subgroup_17;f__Subgroup_17;g__Subgroup_17	0.00432402	0.10832	8.03035e-05	0.000276853	8.18451e-08	3.8583e-07
d__Bacteria;p__Proteobacteria;c__Alphaproteobacteria;o__Rhizobiales;f__Hyphomicrobiaceae;g__Pedomicrobium	0.00203846	0.108091	1.26319e-10	7.17092e-10	3.07201e-15	2.83943e-14
d__Bacteria;p__Proteobacteria;c__Gammaproteobacteria;o__Burkholderiales;f__Nitrosomonadaceae;g__mle1-7	0.00753614	0.102446	3.97854e-06	1.58398e-05	1.18626e-11	7.59196e-11
d__Bacteria;p__Proteobacteria;c__Gammaproteobacteria;o__Burkholderiales;f__Nitrosomonadaceae;g__MND1	0.00240909	0.0987844	5.31783e-09	2.65239e-08	1.23583e-14	1.03251e-13
d__Bacteria;p__Proteobacteria;c__Gammaproteobacteria;o__Xanthomonadales;f__Xanthomonadaceae;__	0.0556357	0.094894	0.00194555	0.00669534	0.000179997	0.000626487
d__Bacteria;p__Planctomycetota;c__Phycisphaerae;o__Tepidisphaerales;f__WD2101_soil_group;g__WD2101_soil_group	0.190874	0.0914614	0.00838875	0.0263892	0.00207477	0.00659724
d__Bacteria;p__Planctomycetota;c__OM190;o__OM190;f__OM190;g__OM190	0.00257382	0.0896306	1.03413e-11	6.50217e-11	3.86339e-15	3.5435e-14
d__Bacteria;p__Bacteroidota;c__Bacteroidia;o__Chitinophagales;f__uncultured;g__uncultured	0.00255323	0.0896306	2.03164e-12	1.28883e-11	2.29124e-15	2.2894e-14
d__Bacteria;p__Actinobacteriota;c__Actinobacteria;o__Propionibacteriales;f__Nocardioidaceae;g__Aeromicrobium	0.161121	0.087037	0.000474774	0.00177768	5.07772e-05	0.000186388
d__Bacteria;p__Actinobacteriota;c__Actinobacteria;o__Streptosporangiales;f__Thermomonosporaceae;g__Actinomadura	0	0.0828416	0.0094706	0.0274113	0.00871693	0.0240717
d__Bacteria;p__Verrucomicrobiota;c__Verrucomicrobiae;o__Pedosphaerales;f__Pedosphaeraceae;__	0.0449492	0.0826127	2.35789e-05	8.87415e-05	2.97719e-09	1.59801e-08
d__Bacteria;p__Bacteroidota;c__Bacteroidia;o__Cytophagales;f__Spirosomaceae;g__Dyadobacter	0.477207	0.0805531	3.82002e-08	2.2419e-07	4.8897e-13	3.97927e-12
d__Bacteria;p__Proteobacteria;c__Alphaproteobacteria;o__Acetobacterales;f__Acetobacteraceae;__	0.218507	0.0768153	0.0164094	0.0498291	0.00580196	0.0175749
d__Bacteria;p__Verrucomicrobiota;c__Verrucomicrobiae;o__Pedosphaerales;f__Pedosphaeraceae;g__uncultured	0.10635	0.072391	0.0012048	0.00428083	8.48285e-05	0.000305283
d__Bacteria;p__Acidobacteriota;c__Acidobacteriae;o__Bryobacterales;f__Bryobacteraceae;g__Bryobacter	0.0129309	0.0720859	0.00788553	0.0226238	6.41013e-05	0.000233533
d__Bacteria;p__Bacteroidota;c__Bacteroidia;o__Chitinophagales;f__Chitinophagaceae;g__Edaphobaculum	0.421468	0.0703314	2.57363e-07	1.19302e-06	8.10827e-14	7.53132e-13
d__Bacteria;p__Firmicutes;c__Clostridia;o__Clostridiales;f__Clostridiaceae;g__Clostridium_sensu_stricto_13	4.11811e-05	0.0702551	8.13877e-05	0.00028583	7.81707e-07	3.1201e-06
d__Bacteria;p__Bdellovibrionota;c__Bdellovibrionia;o__Bdellovibrionales;f__Bdellovibrionaceae;g__OM27_clade	6.17717e-05	0.0684244	1.50542e-14	1.06278e-13	2.65106e-16	3.42824e-15
d__Bacteria;p__Proteobacteria;c__Alphaproteobacteria;o__Rhizobiales;f__Beijerinckiaceae;g__Methylobacterium-Methylorubrum	0.181465	0.0679667	2.70145e-06	1.25898e-05	3.22032e-09	1.72048e-08
d__Bacteria;p__Proteobacteria;c__Alphaproteobacteria;o__Rhizobiales;f__Beijerinckiaceae;g__Bosea	0.290018	0.0657545	1.18136e-05	5.18407e-05	3.79742e-09	2.02631e-08
d__Bacteria;p__Proteobacteria;c__Alphaproteobacteria;o__Acetobacterales;f__Acetobacteraceae;g__Acidocella	0.278693	0.065602	1.65372e-08	9.98978e-08	3.78092e-13	3.12891e-12
d__Bacteria;p__Proteobacteria;c__Gammaproteobacteria;o__PLTA13;f__PLTA13;g__PLTA13	4.11811e-05	0.0623219	8.00798e-10	4.60246e-09	3.09214e-14	2.42763e-13
d__Bacteria;p__Desulfobacterota;c__uncultured;o__uncultured;f__uncultured;g__uncultured	0.00076185	0.0615591	8.62178e-07	3.73659e-06	3.51261e-11	1.9334e-10
d__Bacteria;p__Bacteroidota;c__Bacteroidia;o__Cytophagales;f__Microscillaceae;__	0.124841	0.0613302	4.16539e-06	1.81924e-05	2.99022e-09	1.55577e-08
d__Bacteria;p__Acidobacteriota;c__Vicinamibacteria;o__Vicinamibacterales;f__Vicinamibacteraceae;g__Vicinamibacter	6.17717e-05	0.0604148	0.000888227	0.00275819	2.18249e-05	7.96274e-05
d__Bacteria;p__Actinobacteriota;c__Acidimicrobiia;o__Microtrichales;f__Ilumatobacteraceae;g__uncultured	0.00770087	0.0598809	3.51196e-10	1.89673e-09	1.9943e-15	2.04137e-14
d__Bacteria;p__Proteobacteria;c__Alphaproteobacteria;o__Caulobacterales;f__Caulobacteraceae;__	0.408517	0.0567533	3.29277e-06	1.52516e-05	2.48051e-09	1.3176e-08
d__Bacteria;p__Actinobacteriota;c__Actinobacteria;o__Catenulisporales;f__Catenulisporaceae;g__Catenulispora	0.000267677	0.0551514	0.015465	0.0384654	0.0052974	0.0148608
d__Bacteria;p__Acidobacteriota;c__Acidobacteriae;o__Subgroup_2;f__Subgroup_2;g__Subgroup_2	0.00535354	0.0550752	0.000318088	0.00112733	1.98303e-06	8.19177e-06
d__Bacteria;p__Acidobacteriota;c__Blastocatellia;o__11-24;f__11-24;g__11-24	0.00140016	0.052863	0.000116381	0.000363215	1.16729e-08	5.76421e-08
d__Bacteria;p__Acidobacteriota;c__Acidobacteriae;o__Solibacterales;f__Solibacteraceae;g__Candidatus_Solibacter	0.00403575	0.0524816	6.63734e-05	0.000251326	8.9964e-08	4.27647e-07
d__Bacteria;p__Verrucomicrobiota;c__Verrucomicrobiae;o__Pedosphaerales;f__Pedosphaeraceae;g__Ellin516	0.00076185	0.0524816	2.12048e-05	7.29344e-05	1.99873e-08	9.03576e-08
d__Bacteria;p__Proteobacteria;c__Alphaproteobacteria;o__Tistrellales;f__Geminicoccaceae;g__Candidatus_Alysiosphaera	0.0019561	0.0517951	7.05589e-12	4.34753e-11	1.00108e-15	1.08222e-14
d__Bacteria;p__Myxococcota;c__Myxococcia;o__Myxococcales;f__Myxococcaceae;__	0.0950254	0.0517188	0.000607418	0.00217442	1.15521e-05	4.4162e-05
d__Bacteria;p__Myxococcota;c__Myxococcia;o__Myxococcales;f__Myxococcaceae;g__P3OB-42	0.0227732	0.0499643	0.00273794	0.00845364	2.13315e-05	8.3473e-05
d__Bacteria;p__Proteobacteria;c__Gammaproteobacteria;o__Xanthomonadales;f__Rhodanobacteraceae;g__Rhodanobacter	0.0136104	0.0488201	0.00246413	0.00780453	1.31678e-05	5.35954e-05
d__Bacteria;p__Actinobacteriota;c__Actinobacteria;o__Elev-16S-976;f__Elev-16S-976;g__Elev-16S-976	0.00288268	0.0437092	0.0038049	0.011335	0.000333241	0.00105782
d__Bacteria;p__Proteobacteria;c__Alphaproteobacteria;o__Rhizobiales;f__Beijerinckiaceae;g__Microvirga	0.00574476	0.0430227	3.09749e-06	1.31227e-05	1.34264e-09	7.37054e-09
d__Bacteria;p__Proteobacteria;c__Gammaproteobacteria;o__Enterobacterales;f__Erwiniaceae;g__Erwinia	0.653729	0.042031	2.97883e-11	2.67816e-10	1.0637e-13	9.45408e-13
d__Bacteria;p__Proteobacteria;c__Gammaproteobacteria;o__Xanthomonadales;f__Rhodanobacteraceae;g__Dyella	0.220484	0.042031	9.52996e-05	0.000389335	1.4614e-05	5.71426e-05
d__Bacteria;p__Proteobacteria;c__Alphaproteobacteria;o__Acetobacterales;f__Acetobacteraceae;g__uncultured	0.0222378	0.0403528	8.10598e-08	4.54088e-07	8.10079e-12	5.51271e-11
d__Bacteria;p__Actinobacteriota;c__Actinobacteria;o__Kineosporiales;f__Kineosporiaceae;g__Angustibacter	0.00940988	0.0398189	0.0160812	0.0446864	0.000690563	0.00223294
d__Bacteria;p__Proteobacteria;c__Gammaproteobacteria;o__Xanthomonadales;f__Rhodanobacteraceae;g__Dokdonella	0.02127	0.0356997	0.000151197	0.000598154	0.000262071	0.000930772
d__Bacteria;p__Actinobacteriota;c__Actinobacteria;o__Propionibacteriales;f__Nocardioidaceae;g__Marmoricola	0.158691	0.0350132	1.94103e-06	9.02656e-06	1.4628e-12	1.07605e-11
d__Bacteria;p__Acidobacteriota;c__Acidobacteriae;o__Acidobacteriales;f__Acidobacteriaceae_(Subgroup_1);__	0.0672076	0.0346317	7.32594e-08	3.70439e-07	4.84795e-11	2.85876e-10
d__Bacteria;p__Myxococcota;c__Polyangia;o__Polyangiales;f__Polyangiaceae;g__Aetherobacter	0.372339	0.0343266	5.58444e-07	2.68484e-06	1.39449e-13	1.24701e-12
d__Bacteria;p__Proteobacteria;c__Gammaproteobacteria;o__Enterobacterales;f__Yersiniaceae;g__Rahnella1	0.0443315	0.0336401	0.00026009	0.000944165	1.38568e-05	5.15584e-05
d__Bacteria;p__Proteobacteria;c__Gammaproteobacteria;o__Diplorickettsiales;f__Diplorickettsiaceae;__	0.000597126	0.0335638	0.00503334	0.0151508	0.000558501	0.00175403
d__Bacteria;p__Acidobacteriota;c__Acidobacteriae;o__Acidobacteriales;f__Acidobacteriaceae_(Subgroup_1);g__Occallatibacter	0.000555945	0.0318856	0.000489328	0.0016388	4.51427e-06	1.80394e-05
d__Bacteria;p__Myxococcota;c__Polyangia;o__Nannocystales;f__Nannocystaceae;g__Nannocystis	0.00154429	0.0312754	4.17047e-06	1.65468e-05	6.24499e-11	3.72757e-10
d__Bacteria;p__Myxococcota;c__Polyangia;o__Polyangiales;f__Polyangiaceae;g__Pajaroellobacter	0.239859	0.0300549	1.4233e-08	7.73426e-08	1.56125e-17	2.24484e-16
d__Bacteria;p__Myxococcota;c__bacteriap25;o__bacteriap25;f__bacteriap25;g__bacteriap25	0	0.0282241	2.53342e-09	1.33866e-08	3.41923e-13	2.41652e-12
d__Bacteria;p__Actinobacteriota;c__Actinobacteria;o__Micrococcales;f__Microbacteriaceae;g__Microbacterium	0.0950048	0.0253254	0.00053425	0.00195468	1.31313e-06	5.50945e-06
d__Bacteria;p__Acidobacteriota;c__Acidobacteriae;o__Acidobacteriales;f__Acidobacteriaceae_(Subgroup_1);g__Acidipila	0.0439402	0.0252491	0.00194011	0.00657773	0.000255515	0.000865401
d__Bacteria;p__Bdellovibrionota;c__Oligoflexia;o__0319-6G20;f__0319-6G20;g__0319-6G20	0.226908	0.0237235	2.60422e-11	2.26936e-10	3.46945e-18	4.89096e-17
d__Bacteria;p__Verrucomicrobiota;c__Verrucomicrobiae;o__Verrucomicrobiales;f__Rubritaleaceae;g__Luteolibacter	0.257732	0.0231895	4.34426e-09	2.72769e-08	3.46945e-18	5.26413e-17
d__Bacteria;p__Verrucomicrobiota;c__Verrucomicrobiae;o__Pedosphaerales;f__Pedosphaeraceae;g__Pedosphaeraceae	0.000164724	0.022503	4.29932e-11	2.50465e-10	1.09914e-14	9.12688e-14
d__Bacteria;p__Bacteroidota;c__Bacteroidia;o__Chitinophagales;f__Chitinophagaceae;g__Parafilimonas	0.00547709	0.0214351	0.00724969	0.0213391	0.000184246	0.000616135
d__Bacteria;p__Proteobacteria;c__Gammaproteobacteria;o__Burkholderiales;f__Nitrosomonadaceae;__	0.0110571	0.0208248	0.0111055	0.031617	0.00225673	0.00650902
d__Bacteria;p__Proteobacteria;c__Alphaproteobacteria;o__Reyranellales;f__Reyranellaceae;g__uncultured	0.00181197	0.0208248	0.00046102	0.00135668	2.79412e-08	1.3646e-07
d__Bacteria;p__Proteobacteria;c__Gammaproteobacteria;o__Burkholderiales;f__Oxalobacteraceae;g__Massilia	0.0484908	0.0207485	5.06673e-05	0.000204092	1.5198e-06	6.29944e-06
d__Bacteria;p__Actinobacteriota;c__Actinobacteria;o__Micrococcales;f__Microbacteriaceae;g__Galbitalea	0.378949	0.0206723	7.22628e-11	6.5425e-10	5.72459e-17	8.12523e-16
d__Bacteria;p__Elusimicrobiota;c__Lineage_IIa;o__Lineage_IIa;f__Lineage_IIa;g__Lineage_IIa	0.000102953	0.0204434	4.94876e-05	0.00018063	1.99693e-06	7.2205e-06
d__Bacteria;p__Proteobacteria;c__Gammaproteobacteria;o__Burkholderiales;f__Comamonadaceae;g__Variovorax	0.00677429	0.0199857	3.93735e-13	6.36046e-12	1.2941e-15	1.62967e-14
d__Bacteria;p__Proteobacteria;c__Alphaproteobacteria;o__Rhizobiales;f__Rhizobiaceae;g__Phyllobacterium	0	0.0197569	0.00221294	0.00705864	6.85924e-05	0.000243906
d__Bacteria;p__Actinobacteriota;c__Acidimicrobiia;o__Microtrichales;f__uncultured;g__uncultured	0.00207965	0.0190703	7.97476e-07	3.59336e-06	1.66794e-09	8.85857e-09
d__Bacteria;p__Bacteroidota;c__Bacteroidia;o__Sphingobacteriales;f__Sphingobacteriaceae;g__Pedobacter	0.481263	0.0189941	1.42825e-12	1.42125e-11	1.73472e-18	2.37561e-17
d__Bacteria;p__Bacteroidota;c__Bacteroidia;o__Cytophagales;f__Cytophagaceae;g__Cytophaga	0.443253	0.0186889	2.42198e-10	1.8815e-09	2.13371e-16	3.00304e-15
d__Bacteria;p__Acidobacteriota;c__Blastocatellia;o__Blastocatellales;f__Blastocatellaceae;g__Aridibacter	0.00411811	0.0175447	0.0170628	0.046039	0.00303644	0.00902975
d__Bacteria;p__Acidobacteriota;c__Blastocatellia;__;__;__	0	0.0174684	8.52079e-08	4.11118e-07	1.68356e-10	9.45467e-10
d__Bacteria;p__Actinobacteriota;c__Actinobacteria;o__Streptosporangiales;f__Streptosporangiaceae;__	0	0.0161717	0.00759931	0.0219954	0.00182729	0.00555968
d__Bacteria;p__Proteobacteria;c__Alphaproteobacteria;o__Rhodospirillales;f__Rhodospirillaceae;g__uncultured	0.00222378	0.0160191	3.42187e-05	0.000130345	4.12075e-08	1.97313e-07
d__Bacteria;p__Proteobacteria;c__Alphaproteobacteria;o__Sphingomonadales;f__Sphingomonadaceae;g__Ellin6055	0	0.0154088	0.000871032	0.00265628	2.55318e-06	9.98738e-06
d__Bacteria;p__Bacteroidota;c__Bacteroidia;o__Chitinophagales;f__Chitinophagaceae;g__Flavitalea	0.00242969	0.0147986	0.000335467	0.00116497	1.02823e-05	3.84256e-05
d__Bacteria;p__Proteobacteria;c__Alphaproteobacteria;o__Rhizobiales;f__Beijerinckiaceae;g__Roseiarcus	0.0307417	0.0144172	0.0020924	0.00637201	5.78235e-05	0.000203324
d__Bacteria;p__Nitrospirota;c__Nitrospiria;o__Nitrospirales;f__Nitrospiraceae;g__Nitrospira	0	0.0140358	9.54032e-09	4.92951e-08	2.5637e-12	1.71319e-11
d__Bacteria;p__Proteobacteria;c__Gammaproteobacteria;o__Gammaproteobacteria;f__Gammaproteobacteria;g__Gammaproteobacteria	6.17717e-05	0.0131967	2.47206e-05	8.69818e-05	3.54398e-09	1.85944e-08
d__Bacteria;p__Proteobacteria;c__Alphaproteobacteria;o__Rhizobiales;f__Xanthobacteraceae;g__Rhodopseudomonas	0.301096	0.0125864	6.55516e-12	6.59391e-11	0	0
d__Bacteria;p__Acidobacteriota;c__Acidobacteriae;o__Acidobacteriales;f__Acidobacteriaceae_(Subgroup_1);g__Granulicella	0.198122	0.0124339	5.09982e-08	2.99888e-07	1.49668e-12	1.12842e-11
d__Bacteria;p__Proteobacteria;c__Gammaproteobacteria;o__Xanthomonadales;f__Xanthomonadaceae;g__Stenotrophomonas	0.133159	0.0121287	1.04598e-05	4.37723e-05	1.00417e-07	4.70866e-07
d__Bacteria;p__Bdellovibrionota;c__Oligoflexia;o__Oligoflexales;f__Oligoflexales;g__Oligoflexus	0.0965491	0.0118236	1.29865e-06	5.84718e-06	5.00998e-10	2.73225e-09
d__Bacteria;p__Proteobacteria;c__Alphaproteobacteria;o__Micavibrionales;f__uncultured;g__uncultured	0.130071	0.0114422	1.96642e-11	1.93036e-10	0	0
d__Bacteria;p__Acidobacteriota;c__Acidobacteriae;o__Acidobacteriales;f__Acidobacteriaceae_(Subgroup_1);g__Acidicapsa	0.0216407	0.0114422	0.0012675	0.00430594	8.08162e-05	0.00028712
d__Bacteria;p__Verrucomicrobiota;c__Verrucomicrobiae;o__Methylacidiphilales;f__Methylacidiphilaceae;g__uncultured	0.587098	0.0111371	1.15094e-12	1.37565e-11	0	0
d__Bacteria;p__Actinobacteriota;c__Actinobacteria;o__Kineosporiales;f__Kineosporiaceae;__	0.0149487	0.0111371	4.43643e-08	2.14122e-07	6.75395e-14	5.31497e-13
d__Bacteria;p__Proteobacteria;c__Gammaproteobacteria;o__Burkholderiales;f__Alcaligenaceae;__	0.126302	0.0107557	5.46934e-09	3.28667e-08	1.3832e-13	1.15837e-12
d__Bacteria;p__Acidobacteriota;c__Acidobacteriae;o__Acidobacteriales;f__Acidobacteriaceae_(Subgroup_1);g__Terriglobus	0.0915868	0.0107557	4.87023e-10	3.69259e-09	1.26114e-15	1.51488e-14
d__Bacteria;p__Planctomycetota;c__Phycisphaerae;o__Tepidisphaerales;f__Tepidisphaeraceae;g__Tepidisphaeraceae	0.0625953	0.0100691	3.48953e-07	1.81725e-06	1.36158e-11	8.81075e-11
d__Bacteria;p__Verrucomicrobiota;c__Verrucomicrobiae;o__Chthoniobacterales;f__Chthoniobacteraceae;__	0.00774205	0.00953517	0.00331999	0.0103098	7.20728e-05	0.000258438
d__Bacteria;p__Proteobacteria;c__Alphaproteobacteria;o__Rhizobiales;f__Xanthobacteraceae;g__Afipia	0.0994524	0.00923005	2.09761e-11	1.91759e-10	0	0
d__Bacteria;p__Proteobacteria;c__Gammaproteobacteria;o__Burkholderiales;f__Comamonadaceae;g__Acidovorax	0.00286209	0.00831467	0.00655027	0.0200852	0.00103918	0.00328835
d__Bacteria;p__Verrucomicrobiota;c__Chlamydiae;o__Chlamydiales;f__Parachlamydiaceae;g__Candidatus_Protochlamydia	0.0161224	0.00808583	0.00171854	0.00566478	0.000283558	0.00090253
d__Bacteria;p__Bacteroidota;c__Bacteroidia;o__Sphingobacteriales;f__env.OPS_17;g__env.OPS_17	0.240971	0.00793326	4.1789e-12	4.34199e-11	0	0
d__Bacteria;p__Methylomirabilota;c__Methylomirabilia;o__Rokubacteriales;f__Rokubacteriales;g__Rokubacteriales	0	0.00770442	0.00303949	0.00961439	0.000475807	0.00154091
d__Bacteria;p__Bdellovibrionota;c__Bdellovibrionia;o__Bdellovibrionales;f__Bdellovibrionaceae;g__Bdellovibrio	0.317712	0.00739929	1.1951e-12	1.41005e-11	0	0
d__Bacteria;p__Proteobacteria;c__Gammaproteobacteria;o__Xanthomonadales;f__Rhodanobacteraceae;g__Luteibacter	0.0552033	0.00724673	2.11204e-11	2.04308e-10	5.20417e-18	7.62663e-17
d__Bacteria;p__Actinobacteriota;c__Actinobacteria;o__Streptomycetales;f__Streptomycetaceae;g__Kitasatospora	0.000102953	0.00717045	0.00912136	0.0270427	0.0020697	0.0062498
d__Bacteria;p__Bacteroidota;c__Bacteroidia;o__Sphingobacteriales;f__KD3-93;g__KD3-93	0.0302269	0.0065602	8.49394e-05	0.000326572	6.56902e-06	2.40571e-05
d__Bacteria;p__Proteobacteria;c__Alphaproteobacteria;o__Rhizobiales;f__Rhizobiaceae;g__Ensifer	0	0.00640764	6.14996e-05	0.000237418	4.70679e-06	1.90915e-05
d__Bacteria;p__Proteobacteria;c__Gammaproteobacteria;o__Enterobacterales;__;__	0.0944695	0.00633135	6.28502e-05	0.000234109	1.04444e-05	3.71746e-05
d__Bacteria;p__Proteobacteria;c__Gammaproteobacteria;o__Legionellales;f__Legionellaceae;g__Legionella	0.0805914	0.00579738	1.08637e-08	6.44287e-08	3.21531e-12	2.24472e-11
d__Bacteria;p__Verrucomicrobiota;c__Verrucomicrobiae;o__Pedosphaerales;f__Pedosphaeraceae;g__DEV008	0.00210024	0.00579738	0.0137258	0.0398197	0.00192276	0.00584105
d__Bacteria;p__Proteobacteria;c__Gammaproteobacteria;o__Burkholderiales;f__Oxalobacteraceae;g__Duganella	0.048779	0.00480573	0.00670674	0.0207057	0.00180642	0.00564942
d__Bacteria;p__Proteobacteria;c__Alphaproteobacteria;o__Rhizobiales;f__Beijerinckiaceae;g__alphaI_cluster	0.00177079	0.00472945	0.0147188	0.0407727	0.00447539	0.0125619
d__Bacteria;p__Verrucomicrobiota;c__Verrucomicrobiae;o__Verrucomicrobiales;f__Verrucomicrobiaceae;g__Prosthecobacter	0.0285385	0.00465316	0.000184195	0.000706479	1.2407e-06	5.16923e-06
d__Bacteria;p__Proteobacteria;c__Alphaproteobacteria;o__Ferrovibrionales;f__Ferrovibrionaceae;g__Ferrovibrio	0.0120455	0.00457688	0.0157592	0.0463671	0.00207707	0.00644406
d__Bacteria;p__Actinobacteriota;c__Actinobacteria;o__Corynebacteriales;f__Nocardiaceae;g__Rhodococcus	0.0683606	0.00442432	9.53619e-09	5.63817e-08	1.56784e-14	1.52026e-13
d__Bacteria;p__Proteobacteria;c__Gammaproteobacteria;o__WD260;f__WD260;g__WD260	0.0249352	0.00434804	0.000810711	0.00272462	6.54041e-05	0.000227427
d__Bacteria;p__Bdellovibrionota;c__Bdellovibrionia;o__Bacteriovoracales;f__Bacteriovoracaceae;g__Peredibacter	0.0726023	0.00427176	1.7733e-08	1.05471e-07	3.36131e-12	2.1569e-11
d__Bacteria;p__Actinobacteriota;c__Actinobacteria;o__PeM15;f__PeM15;g__PeM15	0.0193757	0.00427176	0.00307117	0.00955694	0.000228425	0.000750576
d__Bacteria;p__Cyanobacteria;c__Vampirivibrionia;o__Vampirovibrionales;f__Vampirovibrionaceae;g__Vampirovibrio	0.0582507	0.00404291	0.000657068	0.00229155	7.49286e-05	0.000265733
d__Bacteria;p__Actinobacteriota;c__Actinobacteria;o__Micrococcales;f__Demequinaceae;g__Demequina	0.0261912	0.00381407	0.00165684	0.00551241	0.000105343	0.000356185
d__Bacteria;p__Proteobacteria;c__Gammaproteobacteria;o__Burkholderiales;f__Comamonadaceae;g__Pelomonas	0.0172137	0.00358522	0.000651258	0.00222662	0.000178339	0.000559837
d__Bacteria;p__Proteobacteria;c__Gammaproteobacteria;o__Cellvibrionales;f__Cellvibrionaceae;g__Cellvibrio	0.079809	0.0032801	5.76803e-06	2.1564e-05	1.39358e-10	8.35741e-10
d__Bacteria;p__Proteobacteria;c__Alphaproteobacteria;o__Rhizobiales;f__Kaistiaceae;g__Kaistia	0.31658	0.00289869	6.13971e-14	9.82641e-13	0	0
d__Bacteria;p__Bdellovibrionota;c__Bdellovibrionia;o__Bacteriovoracales;f__Bacteriovoracaceae;g__Bacteriovorax	0.193572	0.00259357	2.06929e-12	2.27724e-11	0	0
d__Bacteria;p__Bacteroidota;c__Bacteroidia;o__Cytophagales;f__Hymenobacteraceae;g__Hymenobacter	0.101759	0.00236472	2.80537e-08	1.57598e-07	2.52271e-11	1.60982e-10
d__Bacteria;p__Bacteroidota;c__Bacteroidia;o__Flavobacteriales;f__Weeksellaceae;g__Chryseobacterium	0.200573	0.00228844	1.38278e-10	9.9326e-10	4.54498e-16	5.76927e-15
d__Bacteria;p__Planctomycetota;c__Phycisphaerae;o__Tepidisphaerales;f__Tepidisphaeraceae;g__Tepidisphaera	0.0154635	0.0020596	1.21427e-11	9.99251e-11	1.50921e-16	2.08864e-15
d__Bacteria;p__Actinobacteriota;c__Actinobacteria;o__Micrococcales;f__Promicromonosporaceae;g__Promicromonospora	0.0490879	0.00190703	6.85967e-06	2.95775e-05	5.01159e-08	2.30975e-07
d__Bacteria;p__Myxococcota;c__Myxococcia;o__Myxococcales;f__Myxococcaceae;g__Corallococcus	0.00107071	0.00190703	6.63105e-05	0.000250328	1.24792e-06	4.98654e-06
d__Bacteria;p__Actinobacteriota;c__Actinobacteria;o__Micrococcales;f__Microbacteriaceae;g__Curtobacterium	0.0622247	0.00183075	6.4762e-08	3.46376e-07	3.62761e-11	2.18582e-10
d__Bacteria;p__Bacteroidota;c__Bacteroidia;o__Chitinophagales;f__37-13;g__37-13	0.0678871	0.00175447	7.45347e-10	5.15197e-09	3.43475e-16	4.56957e-15
d__Bacteria;p__Bacteroidota;c__Bacteroidia;o__Chitinophagales;f__Chitinophagaceae;g__Filimonas	0.328193	0.00167819	3.0194e-11	2.27591e-10	0	0
d__Bacteria;p__Actinobacteriota;c__Actinobacteria;o__Micrococcales;f__Microbacteriaceae;g__Leifsonia	0.00354158	0.00106794	5.61415e-05	0.000212688	5.59735e-06	2.04142e-05
d__Bacteria;p__Bacteroidota;c__Bacteroidia;o__Chitinophagales;f__Chitinophagaceae;g__Aurantisolimonas	0.250793	0.000839095	2.92396e-12	3.16284e-11	0	0
d__Bacteria;p__Cyanobacteria;c__Vampirivibrionia;o__Obscuribacterales;f__Obscuribacteraceae;g__Candidatus_Obscuribacter	0.0259441	0.000839095	4.62704e-07	2.25693e-06	3.95489e-11	2.40187e-10
d__Bacteria;p__Proteobacteria;c__Alphaproteobacteria;o__Sphingomonadales;f__Sphingomonadaceae;g__Altererythrobacter	0.00724787	0.000839095	6.21251e-07	2.97379e-06	1.93396e-10	1.08081e-09
d__Bacteria;p__Bacteroidota;c__Bacteroidia;o__Flavobacteriales;f__Flavobacteriaceae;__	0.068896	0.00053397	4.29468e-07	2.09109e-06	2.19372e-09	1.15305e-08
d__Bacteria;p__Spirochaetota;c__Spirochaetia;o__Spirochaetales;f__Spirochaetaceae;g__Spirochaeta_2	0.0383808	0.00053397	1.46976e-07	7.70011e-07	2.30592e-10	1.34226e-09
d__Bacteria;p__Bacteroidota;c__Bacteroidia;o__Cytophagales;f__Spirosomaceae;g__Spirosoma	0.0636866	0.000457688	2.36372e-09	1.51892e-08	1.7545e-14	1.70512e-13
d__Bacteria;p__Proteobacteria;c__Alphaproteobacteria;o__Rhizobiales;f__Devosiaceae;g__Arsenicitalea	0.0323478	0.000457688	1.57747e-06	7.22501e-06	4.51754e-09	2.25531e-08
d__Bacteria;p__Actinobacteriota;c__Actinobacteria;o__Corynebacteriales;f__Nocardiaceae;__	0.0189021	0.000457688	8.11672e-05	0.000291412	1.4929e-06	5.97868e-06
d__Bacteria;p__Proteobacteria;c__Alphaproteobacteria;o__Elsterales;f__Elsteraceae;g__Aliidongia	0.0565623	0.000381407	2.8537e-09	1.63081e-08	8.5168e-14	7.08876e-13
d__Bacteria;p__Bacteroidota;c__Bacteroidia;o__Chitinophagales;f__Chitinophagaceae;g__Parasediminibacterium	0.0216613	0.000381407	3.8918e-09	2.36514e-08	2.73254e-14	2.61029e-13
d__Bacteria;p__Bacteroidota;c__Bacteroidia;o__Chitinophagales;f__Chitinophagaceae;g__Sediminibacterium	0.111745	0.000305125	2.91258e-11	2.5446e-10	1.17961e-16	1.63229e-15
d__Bacteria;p__Proteobacteria;c__Alphaproteobacteria;o__Rickettsiales;f__SM2D12;g__SM2D12	0.0784294	0.000305125	1.57827e-11	1.30269e-10	3.46945e-18	5.18791e-17
d__Bacteria;p__Proteobacteria;c__Alphaproteobacteria;o__Acetobacterales;f__Acetobacteraceae;g__Acidisoma	0.0882099	0.000152563	6.89334e-11	6.18236e-10	3.35322e-15	3.44623e-14
d__Bacteria;p__Actinobacteriota;c__Actinobacteria;o__Micrococcales;f__Microbacteriaceae;g__Gryllotalpicola	0.0499939	0.000152563	4.5452e-07	2.1863e-06	1.64781e-10	9.57847e-10
d__Bacteria;p__Verrucomicrobiota;c__Verrucomicrobiae;o__Opitutales;f__Opitutaceae;g__IMCC26134	0.0322242	0.000152563	0.00133753	0.00407722	0.000124432	0.0004033
d__Bacteria;p__Myxococcota;c__Polyangia;o__Polyangiales;f__Polyangiaceae;g__Labilithrix	0.00971874	0.000152563	0.00262689	0.00811454	0.000410061	0.00126612
d__Bacteria;p__Myxococcota;c__Polyangia;o__Polyangiales;f__Polyangiaceae;g__Minicystis	0.00953343	0.000152563	0.012523	0.035754	0.00184089	0.00552942
d__Bacteria;p__Proteobacteria;c__Gammaproteobacteria;o__Burkholderiales;f__Oxalobacteraceae;g__Herbaspirillum	0.0645926	7.62814e-05	8.00803e-11	6.54747e-10	0	0
d__Bacteria;p__Actinobacteriota;c__Actinobacteria;o__Micrococcales;f__Microbacteriaceae;g__Microbacteriaceae	0.00440638	7.62814e-05	2.21139e-06	9.81107e-06	3.20914e-09	1.47236e-08
d__Bacteria;p__Proteobacteria;c__Alphaproteobacteria;o__Rhodospirillales;f__Magnetospirillaceae;g__uncultured	0.174937	0	2.69715e-14	4.69653e-13	0	0
d__Bacteria;p__Proteobacteria;c__Alphaproteobacteria;o__Elsterales;f__Elsteraceae;g__uncultured	0.141622	0	2.89352e-15	7.14192e-14	0	0
d__Bacteria;p__Proteobacteria;c__Alphaproteobacteria;o__Acetobacterales;f__Acetobacteraceae;g__Endobacter	0.107709	0	1.54846e-10	1.19613e-09	8.1532e-17	1.16022e-15
d__Bacteria;p__Proteobacteria;c__Alphaproteobacteria;o__Rhizobiales;f__Xanthobacteraceae;g__Azorhizobium	0.0837624	0	1.69617e-09	1.09659e-08	4.07703e-13	3.17971e-12
d__Bacteria;p__Planctomycetota;c__Phycisphaerae;o__Tepidisphaerales;__;__	0.0769881	0	1.23135e-05	4.99378e-05	3.389e-07	1.31712e-06
d__Bacteria;p__Proteobacteria;c__Alphaproteobacteria;o__Acetobacterales;f__Acetobacteraceae;g__Gluconacetobacter	0.0518058	0	1.63661e-06	7.23788e-06	1.48198e-08	7.03386e-08
d__Bacteria;p__Bacteroidota;c__Bacteroidia;o__Cytophagales;f__Spirosomaceae;g__Larkinella	0.0484702	0	4.71219e-06	1.97704e-05	3.818e-08	1.74517e-07
d__Bacteria;p__Proteobacteria;c__Alphaproteobacteria;o__Rhizobiales;f__Beijerinckiaceae;g__Methylovirgula	0.0429519	0	9.42636e-11	7.67767e-10	5.20417e-18	7.47854e-17
d__Bacteria;p__Proteobacteria;c__Alphaproteobacteria;o__Elsterales;f__Elsteraceae;__	0.0427666	0	3.8424e-09	2.47606e-08	9.14858e-14	7.12646e-13
d__Bacteria;p__Proteobacteria;c__Alphaproteobacteria;o__Elsterales;f__Elsteraceae;g__Elsteraceae	0.0403369	0	9.01697e-07	4.14819e-06	3.58628e-10	2.00123e-09
d__Bacteria;p__Actinobacteriota;c__Actinobacteria;o__Micrococcales;f__Microbacteriaceae;g__Subtercola	0.0378248	0	1.38103e-08	7.94138e-08	9.38685e-12	5.98014e-11
d__Bacteria;p__Cyanobacteria;c__Vampirivibrionia;o__Vampirovibrionales;f__Vampirovibrionaceae;g__Vampirovibrionaceae	0.0350863	0	3.7886e-07	1.81422e-06	7.74903e-10	4.20648e-09
d__Bacteria;p__Proteobacteria;c__Alphaproteobacteria;o__Rhodospirillales;f__uncultured;g__uncultured	0.034901	0	2.76855e-09	1.72942e-08	0	0
d__Bacteria;p__Verrucomicrobiota;c__Verrucomicrobiae;o__Verrucomicrobiales;f__Verrucomicrobiaceae;g__Verrucomicrobium	0.0325331	0	5.04675e-08	2.65703e-07	2.54831e-11	1.52635e-10
d__Bacteria;p__Proteobacteria;c__Alphaproteobacteria;o__Elsterales;f__Elsteraceae;g__Lacibacterium	0.0314006	0	5.0543e-07	2.22407e-06	6.03319e-11	3.57028e-10
d__Bacteria;p__Proteobacteria;c__Gammaproteobacteria;o__Burkholderiales;f__Burkholderiaceae;g__Cupriavidus	0.0299181	0	0.00010529	0.000406416	1.09717e-05	4.04702e-05
d__Bacteria;p__Proteobacteria;c__Alphaproteobacteria;o__Acetobacterales;f__Acetobacteraceae;g__Acidiphilium	0.0296092	0	0.000126102	0.000411307	5.53076e-07	2.33697e-06
d__Bacteria;p__Actinobacteriota;c__Actinobacteria;o__Frankiales;f__Sporichthyaceae;g__Longivirga	0.0294857	0	5.9519e-06	2.51715e-05	1.2747e-09	6.62415e-09
d__Bacteria;p__Proteobacteria;c__Alphaproteobacteria;o__Rhizobiales;f__Beijerinckiaceae;g__1174-901-12	0.0292798	0	3.01287e-06	1.34568e-05	2.24923e-09	1.16126e-08
d__Bacteria;p__Proteobacteria;c__Alphaproteobacteria;o__Acetobacterales;f__Acetobacteraceae;g__Roseococcus	0.0271383	0	1.60884e-07	8.14221e-07	7.5503e-12	4.85185e-11
d__Bacteria;p__Bacteroidota;c__Bacteroidia;o__Chitinophagales;f__Chitinophagaceae;g__Dinghuibacter	0.0240704	0	0.000620384	0.0020463	0.000116421	0.000383537
d__Bacteria;p__Proteobacteria;c__Alphaproteobacteria;o__Rhizobiales;f__Xanthobacteraceae;g__Tardiphaga	0.0235968	0	1.03024e-08	5.81946e-08	6.93889e-18	1.02948e-16
d__Bacteria;p__Proteobacteria;c__Alphaproteobacteria;o__Rhizobiales;f__Xanthobacteraceae;g__Ancylobacter	0.0222378	0	8.20819e-05	0.000293786	4.19216e-07	1.71368e-06
d__Bacteria;p__Proteobacteria;c__Gammaproteobacteria;o__Salinisphaerales;f__Solimonadaceae;g__Hydrocarboniphaga	0.0189227	0	0.000701475	0.00224628	3.37817e-05	0.00011821
d__Bacteria;p__Bacteroidota;c__Bacteroidia;o__Cytophagales;f__Amoebophilaceae;g__Candidatus_Amoebophilus	0.0171725	0	2.68595e-05	0.000107714	1.54689e-07	6.71228e-07
d__Bacteria;p__Proteobacteria;c__Alphaproteobacteria;o__Parvibaculales;f__Parvibaculaceae;g__Parvibaculum	0.014331	0	0.00331147	0.0104175	0.000336597	0.00109301
d__Bacteria;p__Planctomycetota;c__vadinHA49;o__vadinHA49;f__vadinHA49;g__vadinHA49	0.013528	0	0.000278549	0.000942999	1.15764e-05	4.07853e-05
d__Bacteria;p__Proteobacteria;c__Gammaproteobacteria;o__Burkholderiales;f__TRA3-20;g__TRA3-20	0.0101923	0	0.00917296	0.0261001	0.00118714	0.00346361
d__Bacteria;p__Dependentiae;c__Babeliae;o__Babeliales;f__Babeliaceae;g__Babeliaceae	0.00912162	0	0.0186569	0.0468674	0.00315045	0.00926773
d__Bacteria;p__Bacteroidota;c__Bacteroidia;o__Cytophagales;f__Cytophagaceae;__	0.00749496	0	0.00363478	0.0111315	0.000202106	0.000674761
d__Bacteria;p__Proteobacteria;c__Gammaproteobacteria;o__Salinisphaerales;f__Solimonadaceae;g__Alkanibacter	0.00331508	0	0.00269236	0.00814002	0.00014632	0.000487998

## Sheet: Table_S3
Table S3.Core microbiomes. Core microbiome is defined as ASVs found in at least 95% of soil samples.
Tree, ITS, 95%
ASV	taxonomy	rel_aband_%
3913eeb46ce3691b0f8e4c83972169e9	k__Fungi; p__Ascomycota; c__Dothideomycetes; o__Pleosporales; f__Pleosporales_fam_Incertae_sedis; g__Pteridiospora; s__Pteridiospora_sp	50.53
fcf277e10fe77b4501d0260544c03738	k__Fungi; p__Ascomycota; c__Leotiomycetes; o__Helotiales	10.95
1c3337dcfd1394d90234211113e05ad4	k__Fungi; p__Ascomycota; c__Leotiomycetes; o__Helotiales; f__Dermateaceae; g__Pezicula; s__Pezicula_heterochroma	3.77
419bb485ac1c85c69b173adbe831e540	k__Fungi; p__Ascomycota; c__Eurotiomycetes; o__Chaetothyriales; f__Herpotrichiellaceae; g__Phialophora; s__Phialophora_atrovirens	3.22
dfd8b49e39cf778d431a96416f9d4f1a	k__Fungi; p__Ascomycota; c__Sordariomycetes; o__Hypocreales; f__Nectriaceae; g__Dactylonectria; s__Dactylonectria_macrodidyma	1.46
a4e88bc9addced2e76ba93dcd65a0d6e	k__Fungi; p__Ascomycota; c__Sordariomycetes; o__Hypocreales; f__Bionectriaceae; g__Clonostachys; s__Clonostachys_rosea	1.23
db523e81b51653d9c65a0503494d3e60	k__Fungi; p__Ascomycota; c__Sordariomycetes; o__Hypocreales; f__Nectriaceae; g__Ilyonectria; s__Ilyonectria_robusta	0.985
3f78c5fa45cc6a63454aee23c94849a2	k__Fungi; p__Ascomycota; c__Eurotiomycetes; o__Chaetothyriales; f__Herpotrichiellaceae; g__Exophiala	0.84
2cd16a235a21134d7e8c0d327b788048	k__Fungi; p__Ascomycota; c__Leotiomycetes; o__Helotiales	0.34
f501f455a198bef05b44f63f65319c04	k__Fungi; p__Basidiomycota; c__Tremellomycetes; o__Cystofilobasidiales; f__Mrakiaceae; g__Mrakia; s__Mrakia_blollopis	0.151
22670382c472bd9b2882cd6ccfe854dd	k__Fungi; p__Basidiomycota; c__Tremellomycetes; o__Filobasidiales; f__Piskurozymaceae; g__Solicoccozyma; s__Solicoccozyma_terricola	0.149
e0727f657ca1d67bbd2403a27a3b1e27	k__Fungi; p__Ascomycota; c__Sordariomycetes; o__Hypocreales; f__Nectriaceae; g__Fusarium; s__Fusarium_oxysporum	0.144
4f6832495e45c57e8d1b1ba8d110caf5	k__Fungi; p__Ascomycota; c__Sordariomycetes; o__Hypocreales; f__Nectriaceae; g__Fusarium; s__Fusarium_solani	0.116
ee49906049922c9e374fa2c9c11ebcad	k__Fungi; p__Ascomycota; c__Dothideomycetes; o__Pleosporales; f__Neopyrenochaetaceae; g__Neopyrenochaeta; s__Neopyrenochaeta_acicola	0.1
73c9fd8fc64f01a4f5f0a9c165af7f6a	k__Fungi; p__Basidiomycota; c__Cystobasidiomycetes; o__Sakaguchiales; f__Sakaguchiaceae; g__Sakaguchia; s__Sakaguchia_sp	0.072
1d09a7bedb91ba48a8f8658fb482f95f	k__Fungi; p__Ascomycota; c__Leotiomycetes; o__Helotiales; f__Helotiaceae; g__Tetracladium; s__Tetracladium_sp	0.06
1d9a9f2063168dce590d247a5efd27fd	k__Fungi; p__Basidiomycota; c__Tremellomycetes; o__Tremellales; f__Trimorphomycetaceae; g__Saitozyma; s__Saitozyma_podzolica	0.049
6b696a2c61ec718a46b785721b82c02b	k__Fungi; p__Ascomycota; c__Sordariomycetes; o__Sordariales; f__Chaetomiaceae; g__Humicola	0.042
b1a97a54ef97d8deebdb7ba4b2715bef	k__Fungi; p__Ascomycota; c__Sordariomycetes; o__Sordariales; f__Chaetomiaceae; g__Humicola; s__Humicola_quadrangulata	0.042
Root_stock, ITS, 95%
ASV	taxonomy	rel_aband_%
fcf277e10fe77b4501d0260544c03738	k__Fungi; p__Ascomycota; c__Leotiomycetes; o__Helotiales	6.58
1d09a7bedb91ba48a8f8658fb482f95f	k__Fungi; p__Ascomycota; c__Leotiomycetes; o__Helotiales; f__Helotiaceae; g__Tetracladium; s__Tetracladium_sp	5.7
6159dc678f9fa3a4a094681494379eba	k__Fungi; p__Ascomycota; c__Sordariomycetes; o__Hypocreales; f__Nectriaceae; g__Dactylonectria; s__Dactylonectria_macrodidyma	4.21791
ec4121e6e278abba43314cbf8a01aef1	k__Fungi; p__Ascomycota; c__Leotiomycetes; o__Helotiales; f__Helotiales_fam_Incertae_sedis; g__Mycoarthris; s__Mycoarthris_sp	3.9
db523e81b51653d9c65a0503494d3e60	k__Fungi; p__Ascomycota; c__Sordariomycetes; o__Hypocreales; f__Nectriaceae; g__Ilyonectria; s__Ilyonectria_robusta	3.72676
745dd6d747b78eb75245e35b256798fe	k__Fungi; p__Ascomycota; c__Leotiomycetes; o__Helotiales; f__Hyaloscyphaceae; g__Hyaloscypha; s__Hyaloscypha_aureliella	3.47
d908e408f11cd659c7567e7756998269	k__Fungi; p__Ascomycota; c__Leotiomycetes; o__Helotiales; f__Hyaloscyphaceae; g__Hyaloscypha	2.79
0e932adb48c2da2bf58f2e1df6b2e83b	k__Fungi; p__Ascomycota; c__Dothideomycetes; o__Capnodiales; f__Cladosporiaceae; g__Cladosporium	2.31
d050190fd2641ab29957123522af3c1b	k__Fungi; p__Ascomycota; c__Dothideomycetes; o__Pleosporales; f__Phaeosphaeriaceae; g__Paraphoma; s__Paraphoma_radicina	1.45
d80163151f4a901419c4ee92f1666381	k__Fungi; p__Ascomycota; c__Leotiomycetes; o__Helotiales; f__Hyaloscyphaceae	1.43
255823c173722a106721d377edf57fa8	k__Fungi; p__Ascomycota; c__Sordariomycetes; o__Coniochaetales; f__Coniochaetaceae; g__Coniochaeta; s__Coniochaeta_fasciculata	1.037
4ceb128c6d59cb69b840e123a392b3c5	k__Fungi; p__Ascomycota; c__Leotiomycetes; o__Helotiales; f__Helotiaceae; g__Scytalidium; s__Scytalidium_sp	1.03
e5f03ba1cbb9521baf26235dc4fbf974	k__Fungi; p__Ascomycota; c__Leotiomycetes; o__Helotiales; f__Hyaloscyphaceae; g__Hyaloscypha	0.932
2cd16a235a21134d7e8c0d327b788048	k__Fungi; p__Ascomycota; c__Leotiomycetes; o__Helotiales	0.874
453ed8dd5295e91721e5bbb11e71e862	k__Fungi; p__Ascomycota; c__Sordariomycetes; o__Sordariales; f__Chaetomiaceae; g__Dichotomopilus; s__Dichotomopilus_dolichotrichus	0.661441
ee49906049922c9e374fa2c9c11ebcad	k__Fungi; p__Ascomycota; c__Dothideomycetes; o__Pleosporales; f__Neopyrenochaetaceae; g__Neopyrenochaeta; s__Neopyrenochaeta_acicola	0.57
c8e325ceb2f020e3f1675c16f0d0301a	k__Fungi; p__Ascomycota; c__Sordariomycetes; o__Sordariales; f__Cephalothecaceae; g__Phialemonium; s__Phialemonium_inflatum	0.489824
efe239fd70b39e9c6218e6202cc56a7d	k__Fungi; p__Ascomycota; c__Sordariomycetes; o__Microascales; f__Microascaceae; g__Petriella; s__Petriella_sordida	0.395515
18d144d0853cff81ed22e47cb8be01cb	k__Fungi; p__Ascomycota; c__Sordariomycetes; o__Coniochaetales; f__Coniochaetaceae; g__Coniochaeta	0.364
d7d74dd3aaaaf02987b6367431872724	k__Fungi; p__Ascomycota; c__Sordariomycetes; o__Hypocreales; f__Hypocreaceae; g__Trichoderma	0.322543
ec059e2f7f1b472106c67cbb558c8229	k__Fungi; p__Ascomycota; c__Eurotiomycetes; o__Eurotiales; f__Aspergillaceae; g__Talaromyces; s__Talaromyces_amestolkiae	0.209
058cd443db48447fa321657f1ae63628	k__Fungi; p__Ascomycota; c__Sordariomycetes; o__Hypocreales; f__Hypocreales_fam_Incertae_sedis; g__Sarocladium; s__Sarocladium_kiliense	0.207156
4535e01f08a66cdad2ad39bd4214a933	k__Fungi; p__Ascomycota; c__Dothideomycetes; o__Pleosporales; f__Leptosphaeriaceae; g__Plenodomus; s__Plenodomus_sp	0.178
debc1930ad540af156eb24691fbb72de	k__Fungi; p__Ascomycota; c__Sordariomycetes; o__Coniochaetales; f__Coniochaetaceae; g__Coniochaeta; s__Coniochaeta_deborreae	0.175
ed1b422dcc6359cc60e4502bd23d34ed	k__Fungi; p__Basidiomycota; c__Tremellomycetes; o__Filobasidiales; f__Filobasidiaceae; g__Filobasidium; s__Filobasidium_globisporum	0.169934
0d1ebf90a9d47442c782cfdf588adecb	k__Fungi; p__Basidiomycota; c__Tremellomycetes; o__Filobasidiales; f__Filobasidiaceae; g__Naganishia; s__Naganishia_randhawae	0.163318
e14a777e2873da71cd110389a632dc7d	k__Fungi; p__Ascomycota; c__Leotiomycetes; o__Helotiales	0.162
67e03e35b6155d56506f1b1645df6f4c	k__Fungi; p__Ascomycota	0.157
0cda1969a7d77b7e58b43d1890efcb2d	k__Fungi; p__Ascomycota; c__Sordariomycetes; o__Sordariales; f__Cephalothecaceae; g__Phialemonium; s__Phialemonium_atrogriseum	0.151008
26abf2c90ff3eab4a9fa039e43db94e7	k__Fungi; p__Ascomycota; c__Leotiomycetes; o__Helotiales	0.146
4028a594e8afc3def743e9e9c4d57e3e	k__Fungi; p__Ascomycota; c__Dothideomycetes; o__Pleosporales; f__Pleosporaceae; g__Alternaria	0.141
1bb07c6c2b3b22dd9d1c012b93308a66	k__Fungi; p__Mortierellomycota; c__Mortierellomycetes; o__Mortierellales; f__Mortierellaceae; g__Mortierella	0.137533
7f18409c2b773d2821df351f8470f1f6	k__Fungi; p__Ascomycota; c__Leotiomycetes; o__Helotiales	0.123
4c14cb899aa5ed05fb65d5d31d0e2a44	k__Fungi; p__Ascomycota; c__Leotiomycetes; o__Helotiales; f__Hyaloscyphaceae	0.107
275b7a3156847911bf678ab2f4005c9b	k__Fungi; p__Ascomycota; c__Leotiomycetes; o__Helotiales	0.072
3a29280bce5ae77432e4a741b6d09697	k__Fungi; p__Ascomycota; c__Leotiomycetes; o__Helotiales	0.059
b98dc0d0f0d264df0bc8f73494e53ce2	k__Fungi; p__Ascomycota; c__Leotiomycetes; o__Helotiales	0.057
8f595ba0d2a238214cc13eabb6ed1e15	k__Fungi; p__Basidiomycota; c__Tremellomycetes; o__Filobasidiales; f__Piskurozymaceae; g__Piskurozyma	0.0550325
3913eeb46ce3691b0f8e4c83972169e9	k__Fungi; p__Ascomycota; c__Dothideomycetes; o__Pleosporales; f__Pleosporales_fam_Incertae_sedis; g__Pteridiospora; s__Pteridiospora_sp	0.02
Tree, 16S rRNA, 95%
ASV	taxonomy	rel_aband_%
3056f4afba864883d560774cdbdb4100	d__Bacteria; p__Actinobacteriota; c__Actinobacteria; o__Kineosporiales; f__Kineosporiaceae; g__Kineosporia	3.8587
1bf55abf00bb63303cfdc854f2d017dd	d__Bacteria; p__Actinobacteriota; c__Actinobacteria; o__Streptomycetales; f__Streptomycetaceae; g__Streptomyces	3.95875
68835aee69b300ec6b3eafbe763a517a	d__Bacteria; p__Proteobacteria; c__Gammaproteobacteria; o__Steroidobacterales; f__Steroidobacteraceae; g__Steroidobacter	1.88741
07f83b0ac4f5b6f6f8acb594dff37eef	d__Bacteria; p__Proteobacteria; c__Alphaproteobacteria; o__Rhizobiales; f__Xanthobacteraceae; g__Bradyrhizobium	1.90807
ce3fa967b7bc6c1447138ac26042d8cb	d__Bacteria; p__Bacteroidota; c__Bacteroidia; o__Chitinophagales; f__Chitinophagaceae	1.97294
f301bcdec728199e85a0e2b242786254	d__Bacteria; p__Actinobacteriota; c__Actinobacteria; o__Micromonosporales; f__Micromonosporaceae; g__Actinoplanes	1.16003
080fa05fb2309a4db490b6c04f513a8a	d__Bacteria; p__Actinobacteriota; c__Actinobacteria; o__Corynebacteriales; f__Mycobacteriaceae; g__Mycobacterium	0.698641
e4938b5c495f83a33fa3b1d30ef7e643	d__Bacteria; p__Proteobacteria; c__Alphaproteobacteria; o__Sphingomonadales; f__Sphingomonadaceae; g__Parablastomonas; s__uncultured_bacterium	0.56474
98aaf0091f75268c3c3976347035f3dd	d__Bacteria; p__Actinobacteriota; c__Acidimicrobiia	0.415289
6b179dfabbac52e225a1aa0f6f21def4	d__Bacteria; p__Proteobacteria; c__Alphaproteobacteria; o__Rhizobiales; f__Labraceae; g__Labrys; s__Xanthobacteraceae_bacterium	0.432095
de6eabe30cb7509a06beba02c4888bec	d__Bacteria; p__Proteobacteria; c__Gammaproteobacteria; o__Pseudomonadales; f__Moraxellaceae; g__uncultured; s__metagenome	0.405315
2908c9cf322a3818aea79f3f0795dfbb	d__Bacteria; p__Actinobacteriota; c__Thermoleophilia; o__Gaiellales; f__uncultured; g__uncultured; s__metagenome	0.406886
ea8c3f5017275989ca91f6f865f05165	d__Bacteria; p__Proteobacteria; c__Alphaproteobacteria; o__Sphingomonadales; f__Sphingomonadaceae; g__Sphingomonas	0.483928
151f7a4a04f1c4a0a1ed9fedbf2f3cad	d__Bacteria; p__Proteobacteria; c__Gammaproteobacteria; o__Pseudomonadales; f__Moraxellaceae; g__uncultured; s__metagenome	0.388744
cba107e2052e3337cac9f4a8bc6510a8	d__Bacteria; p__Proteobacteria; c__Alphaproteobacteria; o__Dongiales; f__Dongiaceae; g__Dongia	0.454006
51a7b7e9fac7716254dce941d5b5e62b	d__Bacteria; p__Proteobacteria; c__Alphaproteobacteria; o__Dongiales; f__Dongiaceae; g__Dongia	0.478745
d081c223048965bcb2522a911e6f4845	d__Bacteria; p__Proteobacteria; c__Alphaproteobacteria; o__Rhizobiales; f__Rhizobiaceae; g__Mesorhizobium	0.422514
0e3c96e78f100bc27943cc42e896ee5d	d__Bacteria; p__Proteobacteria; c__Alphaproteobacteria; o__Sphingomonadales; f__Sphingomonadaceae; g__Novosphingobium	0.301414
97dc85abea6eefd7f86e4a73d7162a64	d__Bacteria; p__Actinobacteriota; c__Actinobacteria; o__Corynebacteriales; f__Mycobacteriaceae; g__Mycobacterium	0.300786
ba66ee8f3abd37b2c08b93dce38fdf86	d__Bacteria; p__Proteobacteria; c__Gammaproteobacteria; o__Burkholderiales; f__Comamonadaceae	0.290105
fc83ea3d304ce8d8616ff6b38ff62d91	d__Bacteria; p__Proteobacteria; c__Gammaproteobacteria; o__Steroidobacterales; f__Steroidobacteraceae; g__Steroidobacter; s__bacterium_MI-37	0.307226
0b32604e66c0cf1c235bc02aa95008eb	d__Bacteria; p__Proteobacteria; c__Alphaproteobacteria; o__Rhizobiales; f__Xanthobacteraceae; g__Pseudolabrys	0.241728
3bbe1a244a9ea39cf7710eb1842b5b97	d__Bacteria; p__Bacteroidota; c__Bacteroidia; o__Chitinophagales; f__Chitinophagaceae; g__Puia	0.320812
cfae0c351b9fd972b8dd4be4b1c21503	d__Bacteria; p__Actinobacteriota; c__Actinobacteria; o__Micromonosporales; f__Micromonosporaceae; g__Dactylosporangium	0.254765
b20627c22b34c7edd918f9e717cf8e93	d__Bacteria; p__Actinobacteriota; c__Actinobacteria; o__Streptosporangiales; f__Streptosporangiaceae; g__Nonomuraea	1.34286
e6f2fb0ab1193d4214bea58eeb46357d	d__Bacteria; p__Proteobacteria; c__Alphaproteobacteria; o__Rhizobiales; f__Xanthobacteraceae	0.216597
8a33361b015c375d10ece5d3bb166327	d__Bacteria; p__Proteobacteria; c__Alphaproteobacteria; o__Rhizobiales; f__Xanthobacteraceae; g__uncultured	0.199084
4777e65a8ad61a65993a2762b33ed008	d__Bacteria; p__Actinobacteriota; c__Thermoleophilia; o__Solirubrobacterales; f__Solirubrobacteraceae; g__Conexibacter	0.19288
6d9d985384cad5fc265bdfd2f9b082e9	d__Bacteria; p__Proteobacteria; c__Alphaproteobacteria; o__Caulobacterales; f__Caulobacteraceae; g__Phenylobacterium	0.270472
14b83fd6f85b21750f1d81724529e172	d__Bacteria; p__Proteobacteria; c__Alphaproteobacteria; o__Rhizobiales; f__Xanthobacteraceae	0.216205
8bbf372c396ab8185c53293a25e156ff	d__Bacteria; p__Actinobacteriota; c__Thermoleophilia; o__Solirubrobacterales; f__Solirubrobacteraceae; g__Solirubrobacter	0.196964
5ac0c3078ae859a12fbcd8cc0de51268	d__Bacteria; p__Actinobacteriota; c__Actinobacteria; o__Micromonosporales; f__Micromonosporaceae; g__Actinoplanes	0.251231
12c7c65a21088c0b8a958ef7ce860ac9	d__Bacteria; p__Actinobacteriota; c__Acidimicrobiia; o__Microtrichales	0.205367
017d8f672d89850a38ccc86c32608475	d__Bacteria; p__Proteobacteria; c__Gammaproteobacteria; o__Burkholderiales; f__Comamonadaceae; g__Rhizobacter	0.255786
2b637835f8b1945d12f5ba046d83d16f	d__Bacteria; p__Proteobacteria; c__Alphaproteobacteria; o__Rhizobiales; f__Labraceae; g__Labrys; s__Labrys_soli	0.188561
b99806afff25e0d682082cc248a8bbca	d__Bacteria; p__Actinobacteriota; c__Acidimicrobiia; o__IMCC26256; f__IMCC26256; g__IMCC26256	0.247069
c151d3f7e1fb4d0b1d09b7ea1cc20ec6	d__Bacteria; p__Proteobacteria; c__Gammaproteobacteria	0.14199
91e66b687346a58056cb0e30e45d7108	d__Bacteria; p__Actinobacteriota; c__Actinobacteria; o__Pseudonocardiales; f__Pseudonocardiaceae; g__Pseudonocardia	0.137906
b078989ea757ba52ca8820a698b17929	d__Bacteria; p__Actinobacteriota; c__Actinobacteria; o__Frankiales; f__Nakamurellaceae; g__Nakamurella	0.103744
ec6c4f1a1d614fb4103e316235e9ad29	d__Bacteria; p__Proteobacteria; c__Gammaproteobacteria; o__Burkholderiales; f__Methylophilaceae	0.136964
d9487c15024d6d4d8589c85ad89b392d	d__Bacteria; p__Proteobacteria; c__Alphaproteobacteria; o__Caulobacterales; f__Hyphomonadaceae; g__SWB02	0.14788
311e50a2098fc7efced1ee56fad405fa	d__Bacteria; p__Bacteroidota; c__Bacteroidia; o__Cytophagales; f__Microscillaceae; g__uncultured	0.136885
0e656f5a3cac0257688b131d292421c4	d__Bacteria; p__Proteobacteria; c__Alphaproteobacteria; o__Sphingomonadales; f__Sphingomonadaceae; g__Sphingomonas	0.0894505
52778021bae59c8262f00731a3e92a18	d__Bacteria; p__Proteobacteria; c__Gammaproteobacteria; o__Burkholderiales; f__Nitrosomonadaceae; g__MND1	0.0743719
2723157132451712f790cafc87b06cd4	d__Bacteria; p__Actinobacteriota; c__Actinobacteria; o__Corynebacteriales; f__Mycobacteriaceae; g__Mycobacterium	0.0468064
49fdc91f0c01011dde8cfee6dd1e5fb9	d__Bacteria; p__Bacteroidota; c__Bacteroidia; o__Chitinophagales; f__Chitinophagaceae; g__uncultured; s__Panacibacter_ginsenosidivorans	0.0541101
a4a257314f1f80ada9fa26a69a47b215	d__Bacteria; p__Actinobacteriota; c__Thermoleophilia; o__Gaiellales; f__uncultured; g__uncultured	0.0373823
8ec30be5086f00665934ec02a8088624	d__Bacteria; p__Proteobacteria; c__Alphaproteobacteria; o__Rhizobiales	0.041309
178c25ebcd292ab0d26130ed1045102c	d__Bacteria; p__Chloroflexi; c__KD4-96; o__KD4-96; f__KD4-96; g__KD4-96	0.0358116
0f70fb6a2f708962baad540a74d64b4a	d__Bacteria; p__Chloroflexi; c__KD4-96; o__KD4-96; f__KD4-96; g__KD4-96	0.0314922
606e24ace709a731066e07b8db67e42a	d__Bacteria; p__Proteobacteria; c__Alphaproteobacteria; o__Rhizobiales; f__Methyloligellaceae; g__uncultured	0.032199
b79460feaba63c996c8c8aab28623bdb	d__Bacteria; p__Verrucomicrobiota; c__Verrucomicrobiae; o__Chthoniobacterales; f__Chthoniobacteraceae; g__Candidatus_Udaeobacter; s__uncultured_Verrucomicrobia	0.0285079
Rootstock, 16S rRNA, 95%
ASV	taxonomy	rel_aband_%
9dc633c9cb8d598d1f7389b16a9f9616	d__Bacteria; p__Proteobacteria; c__Alphaproteobacteria; o__Rhizobiales; f__Rhizobiaceae; g__Allorhizobium-Neorhizobium-Pararhizobium-Rhizobium	4.55169
d5267613b407debcb353f777bfd81869	d__Bacteria; p__Proteobacteria; c__Alphaproteobacteria; o__Sphingomonadales; f__Sphingomonadaceae; g__Sphingobium	2.7343
7a087a0e8b825ec669a1f26209da9f7c	d__Bacteria; p__Proteobacteria; c__Alphaproteobacteria; o__Caulobacterales; f__Caulobacteraceae; g__Phenylobacterium	1.89633
03baee3975045b28e9a0c0a620f45b54	d__Bacteria; p__Proteobacteria; c__Gammaproteobacteria; o__Pseudomonadales; f__Pseudomonadaceae; g__Pseudomonas	2.59453
15bd3c3846818f1c148911eda04ecede	d__Bacteria; p__Proteobacteria; c__Alphaproteobacteria; o__Rhizobiales; f__Rhizobiaceae; g__Allorhizobium-Neorhizobium-Pararhizobium-Rhizobium; s__Rhizobium_genosp.	1.69911
e39fa39f0b943b18470ea0754bd2b8f6	d__Bacteria; p__Proteobacteria; c__Alphaproteobacteria; o__Sphingomonadales; f__Sphingomonadaceae; g__Sphingobium	2.07462
1caf0d7ffb32f127324a00105904fcfe	d__Bacteria; p__Proteobacteria; c__Gammaproteobacteria; o__Pseudomonadales; f__Moraxellaceae; g__uncultured; s__metagenome	1.02562
1d573028d5f7de89f56c39df0b6d3593	d__Bacteria; p__Actinobacteriota; c__Actinobacteria; o__Streptomycetales; f__Streptomycetaceae; g__Streptomyces	1.09544
e6f2fb0ab1193d4214bea58eeb46357d	d__Bacteria; p__Proteobacteria; c__Alphaproteobacteria; o__Rhizobiales; f__Xanthobacteraceae	1.10174
c8d4db6043dceab4c9b1bade577d8909	d__Bacteria; p__Proteobacteria; c__Alphaproteobacteria; o__Sphingomonadales; f__Sphingomonadaceae; g__Sphingobium	0.856423
22e8ac7f928914c842657d97e47d1567	d__Bacteria; p__Proteobacteria; c__Alphaproteobacteria; o__Rhizobiales; f__Xanthobacteraceae	0.740498
c72a44b1fa95c76b9b6ee41ae2a8c3d2	d__Bacteria; p__Proteobacteria; c__Alphaproteobacteria; o__Sphingomonadales; f__Sphingomonadaceae	0.761583
dbbdb218582113efd8c9221944e04e2d	d__Bacteria; p__Proteobacteria; c__Gammaproteobacteria; o__Burkholderiales; f__Comamonadaceae	0.696517
7965d534a39e5ce6d14aa7a7202a3aec	d__Bacteria; p__Proteobacteria; c__Alphaproteobacteria; o__Rhizobiales; f__Rhizobiaceae; g__Mesorhizobium	0.605362
84eed327688bc8b1c8324c9194bfd592	d__Bacteria; p__Proteobacteria; c__Alphaproteobacteria; o__Caulobacterales; f__Caulobacteraceae; g__Caulobacter; s__Caulobacter_rhizosphaerae	0.643146
bdf8c25d59d0073c2ee55df57508c716	d__Bacteria; p__Proteobacteria; c__Gammaproteobacteria; o__Burkholderiales; f__Oxalobacteraceae	0.575712
9ad542e0baf3e45530c1978b861e5bd4	d__Bacteria; p__Proteobacteria; c__Gammaproteobacteria; o__Pseudomonadales; f__Pseudomonadaceae; g__Pseudomonas	1.20805
320ea22faa11cb22900f0d58e5803556	d__Bacteria; p__Bacteroidota; c__Bacteroidia; o__Chitinophagales; f__Chitinophagaceae; g__Puia	0.654553
84a493b5ad2c6a0fbc6b6e1bc80b41e6	d__Bacteria; p__Proteobacteria; c__Alphaproteobacteria; o__Rhizobiales; f__Rhizobiaceae; g__Allorhizobium-Neorhizobium-Pararhizobium-Rhizobium	0.637298
8ec22a6dbb4a9d837afb9224811f6e1e	d__Bacteria; p__Proteobacteria; c__Alphaproteobacteria; o__Rhizobiales; f__Rhizobiaceae; g__Allorhizobium-Neorhizobium-Pararhizobium-Rhizobium	0.784521
4ba041770f8fca8aacab7404560d1db2	d__Bacteria; p__Proteobacteria; c__Alphaproteobacteria; o__Caulobacterales; f__Caulobacteraceae; g__Caulobacter	0.566055
f67b54e7f4a34ca73f99825aaf72cc2b	d__Bacteria; p__Proteobacteria; c__Alphaproteobacteria; o__Rhizobiales; f__Xanthobacteraceae	0.402648
5391144e02ee792adaa8fda0b7211d22	d__Bacteria; p__Proteobacteria; c__Alphaproteobacteria; o__Sphingomonadales; f__Sphingomonadaceae; g__Novosphingobium	0.385414
53e48872aa6ecdc1e6a8fb515d2444c4	d__Bacteria; p__Proteobacteria; c__Alphaproteobacteria; o__Sphingomonadales; f__Sphingomonadaceae; g__Novosphingobium	0.369992
d0e96aa6e9d460fd1836b9f4fb1a6f40	d__Bacteria; p__Proteobacteria; c__Gammaproteobacteria; o__Burkholderiales; f__Methylophilaceae	0.280382
662a9cb573741335f8044f350a71142e	d__Bacteria; p__Actinobacteriota; c__Actinobacteria; o__Frankiales; f__Frankiaceae; g__Jatrophihabitans	0.305502
7d1b17b278cdf58c43819aae580286c0	d__Bacteria; p__Proteobacteria; c__Gammaproteobacteria; o__Burkholderiales; f__Burkholderiaceae; g__Burkholderia-Caballeronia-Paraburkholderia	0.286147
26f673ba173b49f27c24b3c19e5d9ac0	d__Bacteria; p__Actinobacteriota; c__Actinobacteria; o__Frankiales; f__Frankiaceae; g__Jatrophihabitans	0.375036
d0517889104f20c210a9f6b99de6c8ad	d__Bacteria; p__Proteobacteria; c__Alphaproteobacteria; o__Rhizobiales; f__Rhizobiaceae; g__Allorhizobium-Neorhizobium-Pararhizobium-Rhizobium	0.337191
83078cc87a24d2c12acc894613ebb6c9	d__Bacteria; p__Proteobacteria; c__Alphaproteobacteria; o__Rhizobiales; f__Rhizobiaceae	0.268295
f0b10c9549977a1073af5f1d800b194a	d__Bacteria; p__Bacteroidota; c__Bacteroidia; o__Cytophagales; f__Cytophagaceae; g__Cytophaga	0.327781
da621b13627c27b792e27ee1eb6b6e73	d__Bacteria; p__Proteobacteria; c__Alphaproteobacteria; o__Caulobacterales; f__Caulobacteraceae; g__Brevundimonas	0.214286
7be11268659bef7ec51ef12836b80daf	d__Bacteria; p__Proteobacteria; c__Alphaproteobacteria; o__Sphingomonadales; f__Sphingomonadaceae; g__Novosphingobium	0.303464
eed7eb0fcd159829fa31e2bf2b54cab8	d__Bacteria; p__Bacteroidota; c__Bacteroidia; o__Chitinophagales; f__Chitinophagaceae	0.259688
50a41d523902adefd11058dda86c355a	d__Bacteria; p__Proteobacteria; c__Gammaproteobacteria; o__Burkholderiales; f__Burkholderiaceae; g__Burkholderia-Caballeronia-Paraburkholderia	0.252687
faba070a05556375668f2e6073f99124	d__Bacteria; p__Proteobacteria; c__Alphaproteobacteria; o__Caulobacterales; f__Caulobacteraceae; g__Caulobacter	0.171993
a436a8b9b0f9cdcfa0b740ed19457e13	d__Bacteria; p__Bacteroidota; c__Bacteroidia; o__Sphingobacteriales; f__Sphingobacteriaceae; g__Mucilaginibacter	0.290265
479a5b3c07715b64014d4777086684b2	d__Bacteria; p__Proteobacteria; c__Gammaproteobacteria; o__Burkholderiales; f__Comamonadaceae	0.211238
cba107e2052e3337cac9f4a8bc6510a8	d__Bacteria; p__Proteobacteria; c__Alphaproteobacteria; o__Dongiales; f__Dongiaceae; g__Dongia	0.200511
609e46fd967821a6f80d8cccdd1a426f	d__Bacteria; p__Proteobacteria; c__Gammaproteobacteria; o__Burkholderiales; f__Comamonadaceae	0.191616
5cf9f6fb0020ad06b94577ab3ce8d492	d__Bacteria; p__Proteobacteria; c__Gammaproteobacteria; o__Xanthomonadales; f__Rhodanobacteraceae; g__Dyella	0.220484
311e50a2098fc7efced1ee56fad405fa	d__Bacteria; p__Bacteroidota; c__Bacteroidia; o__Cytophagales; f__Microscillaceae; g__uncultured	0.171375
72aa18ff7d0829f4682c7705d07360ab	d__Bacteria; p__Proteobacteria; c__Gammaproteobacteria; o__Burkholderiales; f__Burkholderiaceae; g__Burkholderia-Caballeronia-Paraburkholderia; s__Paraburkholderia_phenazinium	0.284067
811b29ae35362eb8e0b7932fca4b9b7c	d__Bacteria; p__Proteobacteria; c__Alphaproteobacteria; o__Caulobacterales; f__Caulobacteraceae; g__Asticcacaulis	0.161512
973486fa5d6c73011fed5bbf048c2518	d__Bacteria; p__Actinobacteriota; c__Actinobacteria; o__Micrococcales; f__Microbacteriaceae	0.164663
cebc817ed0d1fcf3f2583d380f392d1b	d__Bacteria; p__Bacteroidota; c__Bacteroidia; o__Chitinophagales; f__Chitinophagaceae; g__Puia; s__metagenome	0.211815
808ef4896b38b7ec7ea52c20a15a47d6	d__Bacteria; p__Proteobacteria; c__Alphaproteobacteria; o__Rhizobiales; f__Xanthobacteraceae; g__Rhodopseudomonas	0.177326
c8a609f50084103d146885d87730feb1	d__Bacteria; p__Bacteroidota; c__Bacteroidia; o__Chitinophagales; f__Chitinophagaceae; g__Puia	0.184368
933e3c48196ca6718722bd5bcdd6fc92	d__Bacteria; p__Actinobacteriota; c__Actinobacteria; o__Micrococcales; f__Microbacteriaceae; g__Galbitalea	0.182885
7d2838c23c41edea96eb8c03d1c9efe1	d__Bacteria; p__Proteobacteria; c__Gammaproteobacteria; o__Enterobacterales; f__Erwiniaceae; g__Erwinia; s__Erwinia_billingiae	0.640078
c416316a55ade449ba7bc51711caed40	d__Bacteria; p__Proteobacteria; c__Alphaproteobacteria; o__Sphingomonadales; f__Sphingomonadaceae; g__Novosphingobium	0.154614
66a158d70828e648a58c7f161810f6bd	d__Bacteria; p__Myxococcota; c__Polyangia; o__Polyangiales; f__Polyangiaceae; g__Pajaroellobacter	0.157229
827628485117cf50d2c1cc2444d7479a	d__Bacteria; p__Proteobacteria; c__Alphaproteobacteria; o__Rhizobiales; f__Rhizobiaceae; g__Allorhizobium-Neorhizobium-Pararhizobium-Rhizobium	0.323292
07f83b0ac4f5b6f6f8acb594dff37eef	d__Bacteria; p__Proteobacteria; c__Alphaproteobacteria; o__Rhizobiales; f__Xanthobacteraceae; g__Bradyrhizobium	0.157703
841831e84dbb4acd50228a1bd39b42c2	d__Bacteria; p__Proteobacteria; c__Alphaproteobacteria; o__Rhizobiales; f__Xanthobacteraceae; g__Bradyrhizobium	0.149817
2b637835f8b1945d12f5ba046d83d16f	d__Bacteria; p__Proteobacteria; c__Alphaproteobacteria; o__Rhizobiales; f__Labraceae; g__Labrys; s__Labrys_soli	0.123255
d33e24bdf6ba71c371c017998b3743bc	d__Bacteria; p__Bdellovibrionota; c__Bdellovibrionia; o__Bacteriovoracales; f__Bacteriovoracaceae; g__Bacteriovorax	0.138492
102b146c875f1a6963b225273a1eb0cf	d__Bacteria; p__Proteobacteria; c__Alphaproteobacteria; o__Rhizobiales; f__Beijerinckiaceae; g__Bosea	0.152514
aa675cab4ee2a5ef2b1192f651d207da	d__Bacteria; p__Proteobacteria; c__Alphaproteobacteria; o__Sphingomonadales; f__Sphingomonadaceae; g__Sphingomonas	0.11156
df6299a866ec8500bbe726b53a560e7b	d__Bacteria; p__Proteobacteria; c__Gammaproteobacteria; o__Burkholderiales; f__Oxalobacteraceae	0.172281
7132ed97a57f837f7f0c211c063007d4	d__Bacteria; p__Proteobacteria; c__Alphaproteobacteria; o__Sphingomonadales; f__Sphingomonadaceae; g__Sphingomonas	0.18408
1ee9995f8e1690785275759d13f671d8	d__Bacteria; p__Proteobacteria; c__Alphaproteobacteria; o__Sphingomonadales; f__Sphingomonadaceae; g__Novosphingobium	0.188898
7c033aa78253bbca91d40afdc14b7b5f	d__Bacteria; p__Proteobacteria; c__Gammaproteobacteria; o__Pseudomonadales; f__Pseudomonadaceae; g__Pseudomonas	0.184594
5cf20e9cb027b1cd5086f41dc56f6b82	d__Bacteria; p__Bacteroidota; c__Bacteroidia; o__Cytophagales; f__Microscillaceae; g__uncultured; s__uncultured_Sphingobacteriales	0.177532
7bfcc60c680e454fb4fa2d03b41c9d67	d__Bacteria; p__Proteobacteria; c__Alphaproteobacteria; o__Rhizobiales; f__Kaistiaceae; g__Kaistia	0.121937
fb605cda891038198d3fdc051dac5604	d__Bacteria; p__Proteobacteria; c__Gammaproteobacteria; o__Xanthomonadales; f__Rhodanobacteraceae	0.13876
750437def4ba1c15c26e95188013ea99	d__Bacteria; p__Proteobacteria; c__Alphaproteobacteria; o__Rhizobiales; f__Rhizobiaceae; g__Allorhizobium-Neorhizobium-Pararhizobium-Rhizobium; s__Rhizobium_smilacinae	0.113351
1033d5161dd3bf98cfa96ab4420844ee	d__Bacteria; p__Proteobacteria; c__Alphaproteobacteria; o__Dongiales; f__Dongiaceae; g__Dongia	0.126714
92c30e11c7f55c23cac43a1a8faba42d	d__Bacteria; p__Proteobacteria; c__Alphaproteobacteria; o__Rhizobiales; f__Rhizobiaceae	0.150785
ed88dee9f879cfbd6aecde7567c012b0	d__Bacteria; p__Bacteroidota; c__Bacteroidia; o__Cytophagales; f__Spirosomaceae; g__Dyadobacter	0.145081
104babf7ab9819ea16e86c280ef9385f	d__Bacteria; p__Proteobacteria; c__Gammaproteobacteria; o__Burkholderiales; f__Oxalobacteraceae	0.128423
02d8ca4e0a5cefd30a7ed84eb4faacc6	d__Bacteria; p__Proteobacteria; c__Alphaproteobacteria; o__Acetobacterales; f__Acetobacteraceae; g__Acidocella; s__uncultured_bacterium	0.136495
47f993d4221c5ab04fe87be5cb71b79c	d__Bacteria; p__Proteobacteria; c__Alphaproteobacteria; o__Rhizobiales; f__Rhizobiaceae	0.157682
8be8c8998b6e46c89c38702dc295d59f	d__Bacteria; p__Bacteroidota; c__Bacteroidia; o__Chitinophagales; f__Chitinophagaceae	0.0855332
cdca0eec7315f5563969be985fa44c35	d__Bacteria; p__Actinobacteriota; c__Actinobacteria; o__Frankiales; f__Frankiaceae; g__Jatrophihabitans	0.150167
00a959200b62a5c781ade3da9954d7b8	d__Bacteria; p__Proteobacteria; c__Alphaproteobacteria; o__Micropepsales; f__Micropepsaceae; g__uncultured	0.0764733
a371a44e39418785b704f7895cd5676c	d__Bacteria; p__Proteobacteria; c__Gammaproteobacteria; o__Burkholderiales; f__Comamonadaceae	0.083227
f278779d49c8c6e1a830a519df755bfc	d__Bacteria; p__Actinobacteriota; c__Actinobacteria; o__Corynebacteriales; f__Mycobacteriaceae; g__Mycobacterium	0.0888482
d50307cd8a80651977c43597d26fe2f7	d__Bacteria; p__Verrucomicrobiota; c__Verrucomicrobiae; o__Methylacidiphilales; f__Methylacidiphilaceae; g__uncultured; s__uncultured_bacterium	0.0721493
03e61a2501c922f5a1371a8136602d85	d__Bacteria; p__Proteobacteria; c__Alphaproteobacteria; o__Rhizobiales	0.118437
9fb989ad9a14b8b3f4e4dd72454f9de6	d__Bacteria; p__Proteobacteria; c__Alphaproteobacteria; o__Elsterales; f__Elsteraceae; g__uncultured	0.057983
4d68bae8e64f26e4ae8497df57cce0a3	d__Bacteria; p__Bacteroidota; c__Bacteroidia; o__Sphingobacteriales; f__Sphingobacteriaceae; g__Mucilaginibacter; s__Mucilaginibacter_polysacchareus	0.0687313
dc4152a8a3d1a5b6e8d621fff954ba38	d__Bacteria; p__Bacteroidota; c__Bacteroidia; o__Sphingobacteriales; f__env.OPS_17; g__env.OPS_17	0.0544414
208e2ba21be12236e4a658495c4a7306	d__Bacteria; p__Bacteroidota; c__Bacteroidia; o__Cytophagales; f__Microscillaceae; g__uncultured	0.0597744
37f234ae36e2dbb1587da6b5177f0b21	d__Bacteria; p__Proteobacteria; c__Alphaproteobacteria; o__Rhizobiales; f__Beijerinckiaceae; g__Methylobacterium-Methylorubrum	0.0475642
19fc16200a38c53ed734f9c9e2cef257	d__Bacteria; p__Verrucomicrobiota; c__Verrucomicrobiae; o__Opitutales; f__Opitutaceae; g__Lacunisphaera	0.0447021
37750fe91aea6799a4c090c7876b0008	d__Bacteria; p__Acidobacteriota; c__Acidobacteriae; o__Acidobacteriales; f__Acidobacteriaceae_(Subgroup_1); g__Edaphobacter	0.0493556
e0354b4fb7adf4496f1cbfa55b6d7204	d__Bacteria; p__Bacteroidota; c__Bacteroidia; o__Chitinophagales; f__Chitinophagaceae	0.0529589

## Sheet: Table_S4_tree_root
Table S4. Node statistics for tree community co-occurrence network. Network was built at genera level taxonomic resolution.
Taxa	AverageShortestPathLength	BetweennessCentrality	ClosenessCentrality	ClusteringCoefficient	Degree	Eccentricity	NeighborhoodConnectivity	Radiality	Stress	TopologicalCoefficient
d__Bacteria.p__Proteobacteria.c__Gammaproteobacteria.o__Xanthomonadales.f__Xanthomonadaceae.g__Pseudoxanthomonas	2.22727	0.0578796	0.44898	0.346622	43	5	20.9767	0.971459	21546	0.16898
d__Bacteria.p__Bacteroidota.c__Bacteroidia.o__Chitinophagales.f__Chitinophagaceae.g__Taibaiella	2.29798	0.0268385	0.435165	0.458111	34	5	23.5	0.969814	14012	0.197479
d__Bacteria.p__Acidobacteriota.c__Acidobacteriae.o__Acidobacteriales.f__uncultured.g__uncultured	2.40404	0.0301443	0.415966	0.350806	32	6	19.8125	0.967348	11612	0.17983
d__Bacteria.p__Actinobacteriota.c__Actinobacteria.o__Propionibacteriales.f__Nocardioidaceae.g__Aeromicrobium	2.40404	0.0118	0.415966	0.513978	31	5	24.7742	0.967348	8224	0.229391
d__Bacteria.p__Proteobacteria.c__Gammaproteobacteria.o__JG36.TzT.191.f__JG36.TzT.191.g__JG36.TzT.191	2.47475	0.0186744	0.404082	0.44086	31	6	22.2258	0.965704	8876	0.2179
d__Bacteria.p__Proteobacteria.c__Gammaproteobacteria.o__Xanthomonadales.f__Xanthomonadaceae.__	2.51515	0.0160911	0.39759	0.487356	30	6	23.9	0.964764	7730	0.239
d__Bacteria.p__Proteobacteria.c__Alphaproteobacteria.o__Rhizobiales.f__Xanthobacteraceae.g__Rhodoplanes	2.42929	0.0223783	0.411642	0.406404	29	5	22.4483	0.966761	9806	0.207854
d__Bacteria.p__Proteobacteria.c__Alphaproteobacteria.o__Rhizobiales.f__Xanthobacteraceae.g__uncultured	2.4697	0.0208362	0.404908	0.417989	28	5	21.6071	0.965821	9076	0.220481
d__Bacteria.p__Actinobacteriota.c__Actinobacteria.o__Streptosporangiales.f__Thermomonosporaceae.g__Actinocorallia	2.48485	0.0130482	0.402439	0.495726	27	5	23.5556	0.965469	6596	0.237935
k__Fungi.p__Ascomycota.c__Sordariomycetes.o__Hypocreales.f__Nectriaceae.g__Dactylonectria	2.4697	0.0156469	0.404908	0.475783	27	5	23.5926	0.965821	8272	0.23359
d__Bacteria.p__Proteobacteria.c__Alphaproteobacteria.o__Caulobacterales.f__Caulobacteraceae.g__Caulobacter	2.43939	0.0127286	0.409938	0.527066	27	5	23.8519	0.966526	7478	0.22716
k__Fungi.p__Ascomycota.c__Sordariomycetes.__.__.__	2.4596	0.0154692	0.406571	0.478632	27	6	23.4074	0.966056	6718	0.214747
d__Bacteria.p__Proteobacteria.c__Alphaproteobacteria.o__Sphingomonadales.f__Sphingomonadaceae.g__Parablastomonas	2.46465	0.031234	0.405738	0.378917	27	5	19.963	0.965938	12052	0.193815
d__Bacteria.p__Proteobacteria.c__Alphaproteobacteria.o__Rhizobiales.f__Rhizobiaceae.g__Mesorhizobium	2.38889	0.0416932	0.418605	0.39886	27	5	20.1852	0.9677	15676	0.1869
d__Bacteria.p__Actinobacteriota.c__Acidimicrobiia.o__IMCC26256.f__IMCC26256.g__IMCC26256	2.46465	0.0218557	0.405738	0.369231	26	5	20.8077	0.965938	8880	0.202016
d__Bacteria.p__Proteobacteria.c__Alphaproteobacteria.o__Sphingomonadales.f__Sphingomonadaceae.g__Novosphingobium	2.5101	0.030557	0.39839	0.369231	26	5	18.9615	0.964881	11138	0.19919
k__Fungi.p__Basidiomycota.c__Tremellomycetes.o__Tremellales.f__Trimorphomycetaceae.g__Saitozyma	2.49495	0.0494546	0.40081	0.224615	26	6	15.2692	0.965234	14432	0.141382
d__Bacteria.p__Proteobacteria.c__Alphaproteobacteria.o__Rhizobiales.f__Beijerinckiaceae.g__Bosea	2.48485	0.0098312	0.402439	0.52	25	5	23.76	0.965469	4922	0.2376
d__Bacteria.p__Proteobacteria.c__Alphaproteobacteria.o__Rhizobiales.f__Devosiaceae.g__Devosia	2.44949	0.010531	0.408247	0.543333	25	5	23.84	0.966291	5172	0.227048
d__Bacteria.p__Bacteroidota.c__Bacteroidia.o__Cytophagales.f__Microscillaceae.g__Ohtaekwangia	2.38384	0.0421289	0.419492	0.33	25	5	21.36	0.967818	15982	0.185739
d__Bacteria.p__Proteobacteria.c__Alphaproteobacteria.o__Caulobacterales.f__Hyphomonadaceae.g__Hirschia	2.4697	0.0347829	0.404908	0.306667	25	5	14.08	0.965821	10380	0.141818
d__Bacteria.p__Actinobacteriota.c__Actinobacteria.o__Streptosporangiales.f__Streptosporangiaceae.g__Nonomuraea	2.57071	0.010209	0.388998	0.518116	24	6	24.0833	0.963472	5820	0.250868
k__Fungi.p__Ascomycota.c__Sordariomycetes.o__Sordariales.f__Lasiosphaeriaceae.g__Schizothecium	2.5202	0.0128341	0.396794	0.452899	24	5	22.375	0.964646	5320	0.238032
d__Bacteria.p__Proteobacteria.c__Alphaproteobacteria.o__Rhizobiales.f__Xanthobacteraceae.g__Pseudorhodoplanes	2.5404	0.0355017	0.393638	0.246377	24	5	13.5417	0.964177	10478	0.14406
d__Bacteria.p__Proteobacteria.c__Gammaproteobacteria.o__Burkholderiales.f__Methylophilaceae.g__Methylotenera	2.56061	0.00690524	0.390533	0.521739	23	5	23.087	0.963707	3686	0.259404
k__Fungi.p__Basidiomycota.c__Tremellomycetes.o__Cystofilobasidiales.f__Mrakiaceae.g__unidentified	2.63131	0.0252038	0.380038	0.359684	23	6	18.4783	0.962062	9336	0.207621
d__Bacteria.p__Actinobacteriota.c__Actinobacteria.o__Micromonosporales.f__Micromonosporaceae.g__Luedemannella	2.46465	0.047636	0.405738	0.296443	23	5	16.8696	0.965938	13616	0.160663
d__Bacteria.p__Proteobacteria.c__Alphaproteobacteria.o__Rhizobiales.f__Devosiaceae.g__uncultured	2.4899	0.0185816	0.401623	0.4329	22	6	22.3182	0.965351	6250	0.21012
d__Bacteria.p__Bacteroidota.c__Bacteroidia.o__Cytophagales.f__Spirosomaceae.g__Dyadobacter	2.53535	0.00705492	0.394422	0.538095	21	5	23.8571	0.964294	3802	0.251128
d__Bacteria.p__Verrucomicrobiota.c__Chlamydiae.o__Chlamydiales.f__Parachlamydiaceae.__	2.56566	0.00585387	0.389764	0.542857	21	6	24.5238	0.963589	3388	0.250243
d__Bacteria.p__Acidobacteriota.c__Vicinamibacteria.o__Vicinamibacterales.f__Vicinamibacteraceae.g__uncultured	2.4899	0.0272756	0.401623	0.280952	21	5	17.3333	0.965351	9390	0.161994
d__Bacteria.p__Proteobacteria.c__Alphaproteobacteria.o__Caulobacterales.f__Caulobacteraceae.g__Phenylobacterium	2.65152	0.0129954	0.377143	0.426316	20	5	18.8	0.961593	6498	0.229268
d__Bacteria.p__Bacteroidota.c__Bacteroidia.o__Cytophagales.f__Microscillaceae.g__Chryseolinea	2.5303	0.0197593	0.39521	0.442105	20	5	21.9	0.964412	6884	0.225258
k__Fungi.p__Ascomycota.c__Sordariomycetes.o__Microascales.f__Microascaceae.g__Scopulariopsis	2.72727	0.0189112	0.366667	0.378947	20	6	17.85	0.959831	7850	0.223125
d__Bacteria.p__Acidobacteriota.c__Vicinamibacteria.o__Vicinamibacterales.f__uncultured.g__uncultured	2.57576	0.0230931	0.388235	0.331579	20	6	16.6	0.963354	7492	0.174737
d__Bacteria.p__Acidobacteriota.c__Thermoanaerobaculia.o__Thermoanaerobaculales.f__Thermoanaerobaculaceae.g__Subgroup_10	2.56061	0.0214779	0.390533	0.405263	20	5	15	0.963707	6560	0.171839
d__Bacteria.p__Proteobacteria.c__Alphaproteobacteria.o__Rhizobiales.f__Rhizobiaceae.g__Allorhizobium.Neorhizobium.Pararhizobium.Rhizobium	2.51515	0.0469947	0.39759	0.339181	19	5	17.9474	0.964764	14632	0.184482
d__Bacteria.p__Myxococcota.c__Polyangia.o__Haliangiales.f__Haliangiaceae.g__Haliangium	2.66162	0.00642376	0.375712	0.470588	18	6	21.2222	0.961358	3238	0.241162
d__Bacteria.p__Actinobacteriota.c__Acidimicrobiia.o__Microtrichales.__.__	2.65657	0.0160117	0.376426	0.392157	18	6	15.4444	0.961475	4880	0.189986
d__Bacteria.p__Bacteroidota.c__Bacteroidia.o__Sphingobacteriales.f__Sphingobacteriaceae.g__Mucilaginibacter	2.74747	0.0368816	0.363971	0.30719	18	5	12.2222	0.959361	10764	0.173016
d__Bacteria.p__Actinobacteriota.c__Actinobacteria.o__Micromonosporales.f__Micromonosporaceae.g__Dactylosporangium	2.71717	0.0234216	0.36803	0.281046	18	5	12.7778	0.960066	5954	0.161744
d__Bacteria.p__NB1.j.c__NB1.j.o__NB1.j.f__NB1.j.g__NB1.j	2.64141	0.0282457	0.378585	0.308824	17	6	13.5882	0.961828	6280	0.167756
d__Bacteria.p__Proteobacteria.c__Alphaproteobacteria.o__Sphingomonadales.f__Sphingomonadaceae.g__Sphingomonas	2.78283	0.014001	0.359347	0.383333	16	6	15.75	0.958539	5738	0.225
d__Bacteria.p__Proteobacteria.c__Alphaproteobacteria.o__Caulobacterales.f__Caulobacteraceae.g__Asticcacaulis	2.59596	0.0301864	0.385214	0.358333	16	5	18.125	0.962885	8488	0.200694
d__Bacteria.p__Proteobacteria.c__Alphaproteobacteria.o__Rhizobiales.f__Rhodomicrobiaceae.g__Rhodomicrobium	2.69192	0.00894818	0.371482	0.441667	16	5	15.5	0.960653	3506	0.196203
d__Bacteria.p__Actinobacteriota.c__Acidimicrobiia.o__Microtrichales.f__Ilumatobacteraceae.g__CL500.29_marine_group	2.77273	0.0123186	0.360656	0.366667	16	6	13.5625	0.958774	4200	0.188368
k__Fungi.p__Ascomycota.c__Dothideomycetes.o__Pleosporales.f__Amorosiaceae.g__Angustimassarina	2.69192	0.0248341	0.371482	0.2	16	5	13.5625	0.960653	7114	0.160714
d__Bacteria.p__Actinobacteriota.c__Thermoleophilia.o__Solirubrobacterales.f__Solirubrobacteraceae.g__Solirubrobacter	2.60101	0.0258098	0.384466	0.275	16	5	12.8125	0.962767	6428	0.143961
d__Bacteria.p__Proteobacteria.c__Alphaproteobacteria.o__Rhizobiales.f__Xanthobacteraceae.g__Bradyrhizobium	2.76263	0.00418103	0.361974	0.533333	15	6	21.8	0.959009	2296	0.2725
k__Fungi.p__Ascomycota.c__Sordariomycetes.o__Hypocreales.__.__	2.68687	0.00564131	0.37218	0.533333	15	6	22.5333	0.96077	2056	0.264314
k__Fungi.p__Ascomycota.c__Sordariomycetes.o__Glomerellales.f__Plectosphaerellaceae.g__Plectosphaerella	2.67172	0.0129965	0.374291	0.457143	15	6	21.4667	0.961123	4036	0.257831
d__Bacteria.p__Gemmatimonadota.c__Gemmatimonadetes.o__Gemmatimonadales.f__Gemmatimonadaceae.g__Gemmatimonas	2.66162	0.0102142	0.375712	0.390476	15	6	18.8	0.961358	3730	0.221176
d__Bacteria.p__Proteobacteria.c__Alphaproteobacteria.o__Sphingomonadales.f__Sphingomonadaceae.__	2.4899	0.0110697	0.401623	0.390476	15	5	21.5333	0.965351	4486	0.203145
k__Fungi.p__Ascomycota.c__Sordariomycetes.o__Atractosporales.f__Conlariaceae.g__Conlarium	2.52525	0.0161117	0.396	0.32381	15	6	19.3333	0.964529	5256	0.18239
d__Bacteria.p__Actinobacteriota.c__Actinobacteria.o__Frankiales.f__Acidothermaceae.g__Acidothermus	2.73737	0.0165044	0.365314	0.238095	15	6	14.5333	0.959596	4354	0.179424
d__Bacteria.p__Actinobacteriota.c__Actinobacteria.o__Propionibacteriales.f__Nocardioidaceae.g__Kribbella	2.64646	0.0630143	0.377863	0.2	15	5	10.7333	0.96171	14974	0.133333
d__Bacteria.p__Proteobacteria.c__Alphaproteobacteria.o__Rhizobiales.f__Rhizobiaceae.__	2.69192	0.00355544	0.371482	0.659341	14	5	23.8571	0.960653	1812	0.305861
k__Fungi.p__Ascomycota.c__Sareomycetes.o__Sareales.f__unidentified.g__unidentified	2.68687	0.0047249	0.37218	0.549451	14	5	23.3571	0.96077	2528	0.28836
d__Bacteria.p__Actinobacteriota.c__Thermoleophilia.o__Solirubrobacterales.__.__	2.75758	0.00884996	0.362637	0.428571	14	5	15.8571	0.959126	2884	0.208647
d__Bacteria.p__Acidobacteriota.c__Vicinamibacteria.o__Subgroup_17.f__Subgroup_17.g__Subgroup_17	2.69192	0.00809597	0.371482	0.450549	14	6	15.7143	0.960653	2756	0.206767
d__Bacteria.p__Bacteroidota.c__Bacteroidia.o__Chitinophagales.f__Chitinophagaceae.g__Terrimonas	2.64646	0.0239354	0.377863	0.395604	14	5	14.9286	0.96171	6060	0.186257
d__Bacteria.p__Proteobacteria.c__Gammaproteobacteria.o__Steroidobacterales.f__Steroidobacteraceae.g__Steroidobacter	2.83333	0.0191815	0.352941	0.21978	14	6	11.9286	0.957364	4458	0.184152
d__Bacteria.p__Actinobacteriota.c__Actinobacteria.o__Corynebacteriales.f__Nocardiaceae.g__Nocardia	2.65152	0.0275573	0.377143	0.241758	14	4	10.8571	0.961593	5724	0.144762
d__Bacteria.p__Actinobacteriota.c__Actinobacteria.o__Corynebacteriales.f__Mycobacteriaceae.g__Mycobacterium	2.9596	0.00741072	0.337884	0.435897	13	6	13.3077	0.954428	2308	0.232119
d__Bacteria.p__Acidobacteriota.c__Acidobacteriae.o__Acidobacteriales.f__Acidobacteriaceae_.Subgroup_1..g__Edaphobacter	3.00505	0.0159364	0.332773	0.358974	13	6	10.7692	0.953371	4498	0.215385
k__Fungi.p__Ascomycota.c__Sordariomycetes.o__Hypocreales.f__Nectriaceae.g__Fusarium	2.74242	0.0157009	0.364641	0.320513	13	5	13.6154	0.959479	4076	0.186512
k__Fungi.p__Ascomycota.c__Eurotiomycetes.o__Chaetothyriales.f__unidentified.g__unidentified	2.58586	0.0281138	0.386719	0.217949	13	5	16	0.96312	7616	0.171216
d__Bacteria.p__Proteobacteria.c__Gammaproteobacteria.o__Steroidobacterales.f__Steroidobacteraceae.g__uncultured	2.74747	0.005	0.363971	0.393939	12	5	19.1667	0.959361	1812	0.255556
d__Bacteria.p__Actinobacteriota.c__Actinobacteria.o__Micromonosporales.f__Micromonosporaceae.g__Virgisporangium	2.89899	0.00388084	0.344948	0.469697	12	6	15	0.955837	1550	0.241935
d__Bacteria.p__Actinobacteriota.c__Actinobacteria.o__Frankiales.f__Frankiaceae.g__Jatrophihabitans	2.94949	0.0104901	0.339041	0.424242	12	6	10	0.954663	2950	0.210993
d__Bacteria.p__Actinobacteriota.c__Actinobacteria.o__Frankiales.f__Frankiaceae.__	2.76263	0.0151338	0.361974	0.30303	12	6	14.25	0.959009	3794	0.1875
d__Bacteria.p__Proteobacteria.c__Alphaproteobacteria.o__Dongiales.f__Dongiaceae.g__Dongia	2.69697	0.0169595	0.370787	0.257576	12	5	13.25	0.960536	5722	0.172078
k__Fungi.p__Ascomycota.c__Eurotiomycetes.o__Chaetothyriales.__.__	2.77273	0.0237466	0.360656	0.30303	12	5	10.25	0.958774	5134	0.163978
d__Bacteria.p__Actinobacteriota.c__Actinobacteria.o__Micrococcales.f__Microbacteriaceae.__	2.82828	0.00390977	0.353571	0.490909	11	6	22.4545	0.957482	1658	0.311869
k__Fungi.p__Mortierellomycota.c__Mortierellomycetes.o__Mortierellales.f__Mortierellaceae.g__Mortierella	2.76768	0.0089009	0.361314	0.509091	11	5	20.8182	0.958891	2946	0.296104
d__Bacteria.p__Proteobacteria.c__Alphaproteobacteria.o__Rhizobiales.f__Rhizobiales_Incertae_Sedis.g__Nordella	2.81818	0.00256866	0.354839	0.581818	11	6	16.9091	0.957717	1092	0.252374
d__Bacteria.p__Proteobacteria.c__Alphaproteobacteria.o__Micropepsales.f__Micropepsaceae.g__uncultured	2.91414	0.00762362	0.343154	0.490909	11	6	11.6364	0.955485	2796	0.215488
d__Bacteria.p__Chloroflexi.c__Chloroflexia.o__Chloroflexales.f__Roseiflexaceae.g__uncultured	3	0.0165113	0.333333	0.254545	11	5	11.1818	0.953488	5092	0.207547
d__Bacteria.p__Bacteroidota.c__Bacteroidia.o__Chitinophagales.f__Chitinophagaceae.__	2.88889	0.0134139	0.346154	0.290909	11	6	13	0.956072	3494	0.201705
d__Bacteria.p__Actinobacteriota.c__Actinobacteria.o__Streptosporangiales.f__Thermomonosporaceae.g__Actinomadura	2.79293	0.0143694	0.358047	0.145455	11	6	12.0909	0.958304	3732	0.166453
d__Bacteria.p__Bacteroidota.c__Bacteroidia.o__Chitinophagales.f__Chitinophagaceae.g__Niastella	3	0.00501633	0.333333	0.555556	10	6	16	0.953488	1382	0.294444
d__Bacteria.p__Verrucomicrobiota.c__Verrucomicrobiae.o__Chthoniobacterales.f__Chthoniobacteraceae.g__Chthoniobacter	2.76263	0.00208989	0.361974	0.533333	10	6	22.8	0.959009	1006	0.281481
d__Bacteria.p__Actinobacteriota.c__Actinobacteria.o__Streptomycetales.f__Streptomycetaceae.g__Streptomyces	2.89899	0.00300419	0.344948	0.577778	10	6	17.6	0.955837	822	0.279365
d__Bacteria.p__Bacteroidota.c__Bacteroidia.o__Chitinophagales.f__Chitinophagaceae.g__Puia	3.15657	0.00415729	0.3168	0.533333	10	6	10.5	0.949847	1200	0.269231
k__Fungi.p__Ascomycota.c__Sordariomycetes.o__Hypocreales.f__Hypocreaceae.g__Trichoderma	2.88384	0.0094458	0.34676	0.466667	10	6	17.2	0.95619	2954	0.26875
d__Bacteria.p__Proteobacteria.c__Alphaproteobacteria.o__Rhizobiales.f__Rhizobiales_Incertae_Sedis.g__uncultured	2.80303	0.0020627	0.356757	0.622222	10	6	19	0.958069	994	0.263889
d__Bacteria.p__Proteobacteria.c__Gammaproteobacteria.o__Burkholderiales.f__Methylophilaceae.__	2.83333	0.00718772	0.352941	0.4	10	5	13.6	0.957364	2012	0.222951
d__Bacteria.p__Proteobacteria.c__Alphaproteobacteria.o__Rhizobiales.f__Beijerinckiaceae.g__Methylobacterium.Methylorubrum	2.84848	0.0142489	0.351064	0.355556	10	6	14.7	0.957012	4140	0.222727
k__Fungi.p__Ascomycota.c__Sordariomycetes.o__Myrmecridiales.f__Myrmecridiales_fam_Incertae_sedis.g__Atractospora	2.82828	0.00733214	0.353571	0.288889	10	6	14.8	0.957482	3128	0.220896
k__Fungi.p__Ascomycota.c__Sordariomycetes.o__Sordariales.__.__	2.76263	0.0262422	0.361974	0.4	10	6	17.2	0.959009	5978	0.219231
k__Fungi.p__Ascomycota.c__Eurotiomycetes.o__Chaetothyriales.f__Herpotrichiellaceae.g__Exophiala	3.0303	0.0122693	0.33	0.355556	10	5	8.5	0.952784	3286	0.202381
d__Bacteria.p__Myxococcota.c__Polyangia.o__Polyangiales.f__Phaselicystidaceae.g__Phaselicystis	2.70707	0.0211277	0.369403	0.266667	10	6	16.1	0.960301	5110	0.2
d__Bacteria.p__Bacteroidota.c__Bacteroidia.o__Flavobacteriales.f__Flavobacteriaceae.g__Flavobacterium	2.92929	0.003852	0.341379	0.722222	9	6	22.8889	0.955133	1552	0.373406
d__Bacteria.p__Bacteroidota.c__Bacteroidia.o__Chitinophagales.f__Chitinophagaceae.g__Pseudoflavitalea	2.88384	0.0104922	0.34676	0.638889	9	6	24.8889	0.95619	3852	0.369818
d__Bacteria.p__Proteobacteria.c__Alphaproteobacteria.o__Sphingomonadales.f__Sphingomonadaceae.g__Sphingobium	2.94444	0.00213923	0.339623	0.555556	9	5	16.4444	0.95478	616	0.304527
d__Bacteria.p__Proteobacteria.c__Gammaproteobacteria.o__Pseudomonadales.f__Moraxellaceae.g__uncultured	2.95455	0.000933129	0.338462	0.666667	9	5	15.8889	0.954545	392	0.29979
d__Bacteria.p__Proteobacteria.c__Gammaproteobacteria.o__Xanthomonadales.f__Rhodanobacteraceae.__	3.23232	0.00239043	0.309375	0.611111	9	6	10.8889	0.948086	684	0.294294
d__Bacteria.p__Proteobacteria.c__Alphaproteobacteria.o__uncultured.f__uncultured.g__uncultured	3.03535	0.00246575	0.329451	0.472222	9	6	15.4444	0.952666	930	0.289308
d__Bacteria.p__Acidobacteriota.c__Vicinamibacteria.o__Vicinamibacterales.__.__	3.07071	0.00331104	0.325658	0.333333	9	6	12.6667	0.951844	1002	0.269504
k__Fungi.p__Basidiomycota.c__Tremellomycetes.o__Filobasidiales.f__Piskurozymaceae.g__Solicoccozyma	2.87374	0.00239123	0.347979	0.416667	9	5	15.7778	0.956425	978	0.261111
k__Fungi.p__Ascomycota.c__Eurotiomycetes.o__Chaetothyriales.f__Trichomeriaceae.g__Knufia	2.90404	0.00543846	0.344348	0.416667	9	5	11	0.95572	1536	0.22
d__Bacteria.p__Actinobacteriota.c__Actinobacteria.o__Propionibacteriales.f__Nocardioidaceae.g__Nocardioides	2.86869	0.00490912	0.348592	0.277778	9	6	12.8889	0.956542	1372	0.214815
k__Fungi.p__Ascomycota.c__Leotiomycetes.o__Helotiales.f__Hyaloscyphaceae.g__Hyaloscypha	2.90909	0.0137592	0.34375	0.25	9	6	11.8889	0.955603	2648	0.210317
d__Bacteria.p__Actinobacteriota.c__Thermoleophilia.o__Gaiellales.f__Gaiellaceae.g__Gaiella	2.96465	0.00112944	0.337308	0.642857	8	6	21.625	0.954311	452	0.337891
k__Fungi.p__Ascomycota.c__Sordariomycetes.o__Hypocreales.f__Nectriaceae.g__Cylindrocladiella	2.96465	0.0163251	0.337308	0.214286	8	6	16.375	0.954311	4884	0.280702
d__Bacteria.p__Actinobacteriota.c__Acidimicrobiia.__.__.__	2.95455	0.00170204	0.338462	0.464286	8	6	14.75	0.954545	670	0.263393
k__Fungi.p__Ascomycota.c__Dothideomycetes.o__Pleosporales.f__Pleosporales_fam_Incertae_sedis.g__Pteridiospora	2.87374	0.0122351	0.347979	0.5	8	5	14.875	0.956425	2978	0.258772
d__Bacteria.p__Proteobacteria.c__Gammaproteobacteria.__.__.__	2.93939	0.00268228	0.340206	0.321429	8	6	17	0.954898	920	0.255682
d__Bacteria.p__Proteobacteria.c__Gammaproteobacteria.o__Burkholderiales.f__Burkholderiaceae.g__Burkholderia.Caballeronia.Paraburkholderia	2.90909	0.0051546	0.34375	0.464286	8	6	15	0.955603	1896	0.247917
d__Bacteria.p__Proteobacteria.c__Gammaproteobacteria.o__Steroidobacterales.f__Steroidobacteraceae.__	3.43939	0.0412738	0.290749	0.178571	8	6	6	0.94327	9950	0.23913
d__Bacteria.p__Actinobacteriota.c__Actinobacteria.o__Pseudonocardiales.f__Pseudonocardiaceae.g__Amycolatopsis	3.03535	0.0138871	0.329451	0.392857	8	6	10.5	0.952666	4206	0.223404
d__Bacteria.p__Actinobacteriota.c__Acidimicrobiia.o__Microtrichales.f__Iamiaceae.g__Iamia	3.02525	0.0105684	0.330551	0.178571	8	5	8.875	0.952901	2098	0.196023
k__Fungi.p__Ascomycota.c__Sordariomycetes.o__Microascales.f__Halosphaeriaceae.g__Cirrenalia	2.89394	0.0136439	0.34555	0.285714	8	5	10.375	0.955955	2796	0.193396
d__Bacteria.p__Actinobacteriota.c__Thermoleophilia.o__Gaiellales.f__uncultured.g__uncultured	3.04545	0.00158916	0.328358	0.619048	7	6	18.4286	0.952431	482	0.335065
k__Fungi.p__Ascomycota.c__Eurotiomycetes.o__Chaetothyriales.f__Herpotrichiellaceae.g__Phialophora	2.9697	0.0029639	0.336735	0.52381	7	6	16.4286	0.954193	1004	0.288221
d__Bacteria.p__Actinobacteriota.c__Actinobacteria.o__Pseudonocardiales.f__Pseudonocardiaceae.g__Pseudonocardia	2.91414	0.00777526	0.343154	0.285714	7	6	17.4286	0.955485	1776	0.281106
k__Fungi.p__Mortierellomycota.c__Mortierellomycetes.o__Mortierellales.f__Mortierellaceae.g__Podila	2.88889	0.00395829	0.346154	0.47619	7	5	16.1429	0.956072	1228	0.266667
k__Fungi.p__Ascomycota.c__Leotiomycetes.o__Helotiales.f__Dermateaceae.g__Pezicula	3.0404	0.00179795	0.328904	0.380952	7	5	13	0.952549	606	0.265306
d__Bacteria.p__Actinobacteriota.c__Actinobacteria.o__Kineosporiales.f__Kineosporiaceae.g__Kineosporia	3.06566	0.0113533	0.326194	0.238095	7	6	12.5714	0.951961	3288	0.248571
d__Bacteria.p__Proteobacteria.c__Gammaproteobacteria.o__Burkholderiales.__.__	2.89394	0.00781641	0.34555	0.380952	7	5	13.2857	0.955955	2390	0.246032
d__Bacteria.p__Myxococcota.c__Polyangia.o__Polyangiales.f__Sandaracinaceae.g__uncultured	2.83838	0.00569752	0.352313	0.238095	7	6	14.8571	0.957247	1520	0.229911
k__Fungi.p__Ascomycota.c__Dothideomycetes.o__Pleosporales.f__Phaeosphaeriaceae.g__Paraphoma	2.74747	0.015447	0.363971	0.285714	7	5	15.1429	0.959361	3824	0.217391
k__Fungi.p__Ascomycota.c__Eurotiomycetes.o__Eurotiales.f__Aspergillaceae.g__Penicillium	3.10101	0.0156647	0.322476	0.238095	7	5	8.14286	0.951139	3202	0.212355
k__Fungi.p__Ascomycota.c__Dothideomycetes.o__Minutisphaerales.f__Minutisphaeraceae.g__Minutisphaera	3.20202	0.0131043	0.312303	0.466667	6	6	13.5	0.94879	4586	0.325203
d__Bacteria.p__Actinobacteriota.c__Thermoleophilia.o__Solirubrobacterales.f__67.14.g__67.14	3.32323	0.00328179	0.300912	0.533333	6	6	10.6667	0.945971	670	0.323232
d__Bacteria.p__Gemmatimonadota.c__Gemmatimonadetes.o__Gemmatimonadales.f__Gemmatimonadaceae.g__uncultured	3.38889	0.00154146	0.295082	0.333333	6	6	10.5	0.944444	336	0.322917
d__Bacteria.p__Actinobacteriota.c__Actinobacteria.o__Micromonosporales.f__Micromonosporaceae.__	2.9899	0.00342138	0.334459	0.4	6	6	17.8333	0.953723	892	0.321212
k__Fungi.p__Glomeromycota.c__Glomeromycetes.o__Glomerales.f__Claroideoglomeraceae.g__Claroideoglomus	3.10101	0.000418789	0.322476	0.733333	6	5	12.8333	0.951139	162	0.313008
d__Bacteria.p__Chloroflexi.c__KD4.96.o__KD4.96.f__KD4.96.g__KD4.96	3.08081	0.00477866	0.32459	0.4	6	6	13.6667	0.951609	780	0.310606
k__Fungi.p__Basidiomycota.c__Agaricomycetes.o__Sebacinales.f__Serendipitaceae.g__Serendipita	3.13131	0.00204109	0.319355	0.333333	6	6	14	0.950435	722	0.300725
d__Bacteria.p__Actinobacteriota.c__Actinobacteria.o__Micrococcales.f__Cellulomonadaceae.g__Cellulomonas	2.86364	0.00341158	0.349206	0.2	6	6	15.1667	0.95666	1202	0.221393
k__Fungi.p__Ascomycota.c__Dothideomycetes.o__Pleosporales.f__Didymosphaeriaceae.__	3.11111	1.30932e-05	0.321429	0.9	5	6	25.8	0.950904	6	0.496154
d__Bacteria.p__Proteobacteria.c__Alphaproteobacteria.o__Rhizobiales.f__Xanthobacteraceae.g__Pseudolabrys	3.32828	0.000372961	0.300455	0.7	5	6	14	0.945854	196	0.388889
d__Bacteria.p__Proteobacteria.c__Alphaproteobacteria.o__Rhizobiales.f__Hyphomicrobiaceae.g__Hyphomicrobium	3.20202	0.000587027	0.312303	0.7	5	6	15.8	0.94879	382	0.385366
d__Bacteria.p__Actinobacteriota.c__Actinobacteria.o__Kineosporiales.f__Kineosporiaceae.g__Quadrisphaera	3.01515	0.000535865	0.331658	0.6	5	6	21.4	0.953136	160	0.375439
d__Bacteria.p__Chloroflexi.c__TK10.o__TK10.f__TK10.g__TK10	3.25253	0.00740852	0.307453	0.3	5	6	13.6	0.947616	2514	0.348718
d__Bacteria.p__Bacteroidota.c__Bacteroidia.o__Chitinophagales.f__Chitinophagaceae.g__uncultured	3.05051	0.002103	0.327815	0.4	5	6	17.8	0.952314	596	0.332075
d__Bacteria.p__Proteobacteria.c__Alphaproteobacteria.o__Rhizobiales.f__Xanthobacteraceae.__	3.54545	0.00114826	0.282051	0.2	5	7	8	0.940803	242	0.325
d__Bacteria.p__Proteobacteria.c__Alphaproteobacteria.o__Acetobacterales.f__Acetobacteraceae.g__Acidocella	3.22222	0.000863493	0.310345	0.3	5	6	12.8	0.94832	296	0.323077
d__Bacteria.p__Proteobacteria.c__Alphaproteobacteria.o__Caulobacterales.f__Hyphomonadaceae.g__SWB02	3.22222	0.000792259	0.310345	0.5	5	6	13	0.94832	258	0.32
d__Bacteria.p__Bacteroidota.c__Bacteroidia.o__Cytophagales.f__Microscillaceae.g__uncultured	3.09091	0.00042144	0.323529	0.6	5	6	16.2	0.951374	194	0.317647
k__Fungi.p__Ascomycota.c__Leotiomycetes.o__Helotiales.f__Tricladiaceae.g__Tricladium	2.9798	0.00281661	0.335593	0.4	5	6	14.8	0.953958	624	0.304167
k__Fungi.p__Ascomycota.c__Leotiomycetes.o__Helotiales.f__Hyaloscyphaceae.g__Lachnellula	3.16162	0.0211448	0.316294	0.3	5	6	12	0.94973	5286	0.29
k__Fungi.p__Ascomycota.c__Sordariomycetes.o__Hypocreales.f__Nectriaceae.g__Volutella	3.10606	0.00299062	0.321951	0.4	5	5	11.4	0.951022	588	0.287179
k__Fungi.p__Ascomycota.c__Sordariomycetes.o__Hypocreales.f__Nectriaceae.g__Thelonectria	3.02525	0.00348588	0.330551	0.2	5	6	12.4	0.952901	812	0.244
k__Fungi.p__Ascomycota.c__Leotiomycetes.o__Helotiales.f__Leotiaceae.g__Alatospora	2.95455	0.00028305	0.338462	0.666667	4	6	26.75	0.954545	174	0.417969
k__Fungi.p__Basidiomycota.c__Tremellomycetes.o__Tremellales.f__Tremellaceae.g__Tremella	3.37879	6.6301e-05	0.295964	0.5	4	7	16.25	0.944679	24	0.416667
d__Bacteria.p__Actinobacteriota.c__Actinobacteria.o__Frankiales.__.__	3.14141	0.000659422	0.318328	0.333333	4	6	16.25	0.9502	182	0.340426
k__Fungi.p__Ascomycota.c__Dothideomycetes.o__Pleosporales.f__Melanommataceae.g__Alpinaria	3.49495	0.0124022	0.286127	0.166667	4	6	5.5	0.941978	2464	0.333333
d__Bacteria.p__Proteobacteria.c__Gammaproteobacteria.o__Diplorickettsiales.f__Diplorickettsiaceae.g__Aquicella	3.29293	0.012673	0.303681	0	4	6	7.75	0.946676	2092	0.27
k__Fungi.p__Glomeromycota.c__Glomeromycetes.o__Glomerales.f__Glomeraceae.g__Rhizophagus	3.30808	0.00576595	0.30229	0.166667	4	6	7.75	0.946324	1068	0.268519
k__Fungi.p__Ascomycota.c__Leotiomycetes.__.__.__	3.33838	0.0156925	0.299546	0	4	6	6.5	0.945619	2572	0.25
k__Fungi.p__Glomeromycota.c__Glomeromycetes.o__Glomerales.f__Glomeraceae.g__Glomus	3.59091	0	0.278481	1	3	6	11	0.939746	0	0.55
k__Fungi.p__Ascomycota.c__Leotiomycetes.o__Helotiales.f__Tricladiaceae.g__Halenospora	3.58081	8.32352e-05	0.279267	0.666667	3	6	9.66667	0.939981	32	0.483333
k__Fungi.p__Ascomycota.c__Dothideomycetes.o__Pleosporales.f__Melanommataceae.g__Pleotrichocladium	3.49495	9.73363e-05	0.286127	0.666667	3	6	11	0.941978	50	0.478261
k__Fungi.p__Basidiomycota.c__Agaricomycetes.o__Agaricales.f__Entolomataceae.g__Entoloma	3.32323	0.000744036	0.300912	0.666667	3	6	12	0.945971	220	0.444444
k__Fungi.p__Ascomycota.c__Sordariomycetes.o__Microascales.f__Halosphaeriaceae.g__unidentified	3.25253	0.000481087	0.307453	0.333333	3	6	16	0.947616	116	0.435185
k__Fungi.p__Ascomycota.c__Dothideomycetes.o__Pleosporales.f__Didymellaceae.g__Stagonosporopsis	3.38384	0.000350843	0.295522	0.333333	3	5	9.33333	0.944562	50	0.428571
k__Fungi.p__Ascomycota.c__Sordariomycetes.o__Sordariales.f__Chaetomiaceae.g__Humicola	3.25253	0.000256998	0.307453	0.666667	3	6	16	0.947616	50	0.421053
k__Fungi.p__Ascomycota.c__Leotiomycetes.o__Helotiales.f__Tricladiaceae.g__Spirosphaera	3.4596	0.000513905	0.289051	0.333333	3	7	12.3333	0.9428	144	0.4
k__Fungi.p__Basidiomycota.c__Agaricomycetes.o__Cantharellales.f__Cantharellales_fam_Incertae_sedis.g__unidentified	3.33838	0.00150211	0.299546	0.333333	3	6	12.3333	0.945619	280	0.387097
d__Bacteria.p__Proteobacteria.c__Gammaproteobacteria.o__Gammaproteobacteria_Incertae_Sedis.f__Unknown_Family.g__Acidibacter	3.15657	0.0013477	0.3168	0	3	7	18.3333	0.949847	302	0.368794
d__Bacteria.p__Bacteroidota.c__Bacteroidia.o__Chitinophagales.f__Chitinophagaceae.g__Chitinophaga	3.4697	0.0102912	0.28821	0	3	6	8.33333	0.942565	2714	0.349206
k__Fungi.p__Ascomycota.c__Dothideomycetes.__.__.__	3.71717	8.54569e-06	0.269022	0	2	6	10	0.93681	2	0.692308
d__Bacteria.p__Actinobacteriota.c__Actinobacteria.o__Catenulisporales.f__Actinospicaceae.g__Actinospica	3.85859	0	0.259162	1	2	7	10.5	0.933521	0	0.65625
k__Fungi.p__Ascomycota.c__Sordariomycetes.o__Hypocreales.f__Bionectriaceae.g__Clonostachys	3.30808	0	0.30229	1	2	6	19	0.946324	0	0.655172
d__Bacteria.p__Actinobacteriota.c__Thermoleophilia.o__Solirubrobacterales.f__Solirubrobacteraceae.__	3.96465	0	0.252229	1	2	7	4.5	0.931055	0	0.642857
d__Bacteria.p__Verrucomicrobiota.c__Chlamydiae.o__Chlamydiales.f__Parachlamydiaceae.g__Neochlamydia	3.39899	0	0.294205	1	2	7	17.5	0.94421	0	0.625
k__Fungi.p__Basidiomycota.c__Tremellomycetes.o__Trichosporonales.f__Trichosporonaceae.g__Apiotrichum	3.52525	0	0.283668	1	2	6	10	0.941273	0	0.625
d__Bacteria.p__Actinobacteriota.c__Actinobacteria.o__Frankiales.f__Sporichthyaceae.g__uncultured	3.52525	6.65268e-05	0.283668	0	2	6	13	0.941273	56	0.6
d__Bacteria.p__Actinobacteriota.c__MB.A2.108.o__MB.A2.108.f__MB.A2.108.g__MB.A2.108	3.68182	0	0.271605	1	2	7	6.5	0.937632	0	0.590909
k__Fungi.p__Basidiomycota.c__Agaricomycetes.o__Agaricales.f__Mycenaceae.g__unidentified	3.39394	7.22803e-05	0.294643	0	2	7	14.5	0.944327	42	0.5625
k__Fungi.p__Ascomycota.c__Leotiomycetes.o__Helotiales.__.__	3.73232	0.010101	0.26793	0	2	6	9.5	0.936458	2794	0.5
d__Bacteria.p__Actinobacteriota.c__Actinobacteria.o__Micromonosporales.f__Micromonosporaceae.g__Actinoplanes	4.14646	0.010101	0.241169	0	2	7	3	0.926826	2494	0.5
k__Fungi.p__Glomeromycota.c__Glomeromycetes.o__Glomerales.f__Glomeraceae.g__Dominikia	4.42424	0.010101	0.226027	0	2	7	4.5	0.920366	2446	0.5
k__Fungi.p__Ascomycota.c__Leotiomycetes.o__Helotiales.f__Ploettnerulaceae.g__Cadophora	4.31818	0.00192509	0.231579	0	2	7	3	0.922833	384	0.5
k__Fungi.p__Basidiomycota.c__Agaricomycetes.o__Agaricales.f__Cyphellaceae.g__Limnoperdon	4.32323	0.00247838	0.231308	0	2	7	5	0.922716	366	0.5
k__Fungi.p__Basidiomycota.__.__.__.__	3.4697	0.000477979	0.28821	0	2	7	12	0.942565	160	0.5
k__Fungi.p__Ascomycota.c__Dothideomycetes.o__Pleosporales.f__Phaeosphaeriaceae.g__Ophiosphaerella	3.30808	0.000499995	0.30229	0	2	6	19	0.946324	114	0.5
k__Fungi.p__Ascomycota.c__Leotiomycetes.o__Helotiales.f__Helotiaceae.g__Tetracladium	3.64646	0.000181518	0.274238	0	2	7	8.5	0.938454	50	0.5
k__Fungi.p__Ascomycota.c__Dothideomycetes.o__Pleosporales.f__Pleosporales_fam_Incertae_sedis.g__Aaosphaeria	1	0	1	0	1	1	1	1	0	0
k__Fungi.p__Basidiomycota.c__Cystobasidiomycetes.o__Sakaguchiales.f__Sakaguchiaceae.g__Sakaguchia	1	0	1	0	1	1	1	1	0	0
d__Bacteria.p__Actinobacteriota.c__Actinobacteria.o__Streptosporangiales.f__Thermomonosporaceae.__	3.52525	0	0.283668	0	1	6	20	0.941273	0	0
d__Bacteria.p__Proteobacteria.c__Gammaproteobacteria.o__Burkholderiales.f__Oxalobacteraceae.__	3.59091	0	0.278481	0	1	6	16	0.939746	0	0
k__Fungi.p__Ascomycota.c__Leotiomycetes.o__Helotiales.f__Dermateaceae.g__Diplocarpa	3.70202	0	0.270123	0	1	7	10	0.937162	0	0
k__Fungi.p__Basidiomycota.c__Microbotryomycetes.o__Kriegeriales.f__Camptobasidiaceae.g__unidentified	3.75758	0	0.266129	0	1	7	10	0.93587	0	0
d__Bacteria.p__Proteobacteria.c__Gammaproteobacteria.o__Burkholderiales.f__Comamonadaceae.g__Rhizobacter	3.82828	0	0.261214	0	1	7	14	0.934226	0	0
k__Fungi.p__Ascomycota.c__Dothideomycetes.o__Pleosporales.f__Neopyrenochaetaceae.g__Neopyrenochaeta	3.86869	0	0.258486	0	1	6	8	0.933286	0	0
k__Fungi.p__Ascomycota.c__Dothideomycetes.o__Pleosporales.f__Occultibambusaceae.g__Brunneofusispora	3.87879	0	0.257812	0	1	7	9	0.933051	0	0
d__Bacteria.p__Actinobacteriota.c__Actinobacteria.o__Frankiales.f__Frankiaceae.g__Frankia	3.88384	0	0.257477	0	1	7	11	0.932934	0	0
d__Bacteria.p__Actinobacteriota.c__Actinobacteria.o__Catenulisporales.f__Catenulisporaceae.g__Catenulispora	3.9596	0	0.252551	0	1	7	8	0.931172	0	0
k__Fungi.p__Ascomycota.c__Sordariomycetes.o__Sordariomycetes_ord_Incertae_sedis.f__Sordariomycetes_fam_Incertae_sedis.g__Oncopodiella	3.99495	0	0.250316	0	1	6	11	0.93035	0	0
d__Bacteria.p__Actinobacteriota.c__Thermoleophilia.o__Solirubrobacterales.f__Solirubrobacteraceae.g__Conexibacter	4.06061	0	0.246269	0	1	7	7	0.928823	0	0
k__Fungi.p__Ascomycota.c__Sordariomycetes.o__Hypocreales.f__Cordycipitaceae.g__Beauveria	4.19697	0	0.238267	0	1	7	6	0.925652	0	0
d__Bacteria.p__Actinobacteriota.c__Actinobacteria.o__Frankiales.f__Nakamurellaceae.g__Nakamurella	4.28788	0	0.233216	0	1	7	4	0.923538	0	0
d__Bacteria.p__Proteobacteria.c__Gammaproteobacteria.o__Burkholderiales.f__Comamonadaceae.__	4.33333	0	0.230769	0	1	7	4	0.922481	0	0
d__Bacteria.p__Firmicutes.c__Bacilli.o__Entomoplasmatales.f__type_III.g__type_III	4.43434	0	0.225513	0	1	7	8	0.920132	0	0
d__Bacteria.p__Proteobacteria.c__Gammaproteobacteria.o__Pseudomonadales.f__Pseudomonadaceae.g__Pseudomonas	4.46465	0	0.223982	0	1	7	3	0.919427	0	0
k__Fungi.p__Basidiomycota.c__Microbotryomycetes.o__Leucosporidiales.f__Leucosporidiaceae.g__Mastigobasidium	4.72727	0	0.211538	0	1	7	2	0.913319	0	0
d__Bacteria.p__Actinobacteriota.c__Actinobacteria.o__Frankiales.f__Cryptosporangiaceae.g__Cryptosporangium	5.14141	0	0.194499	0	1	8	2	0.903688	0	0
k__Fungi.p__Ascomycota.c__Saccharomycetes.o__Saccharomycetales.f__Phaffomycetaceae.g__Cyberlindnera	5.41919	0	0.184529	0	1	8	2	0.897228	0	0

## Sheet: Table_S5_root_stock
Table S5. Node statistics for rootsstock community co-occurrence network. Network was built at genera level taxonomic resolution.
Taxa	AverageShortestPathLength	BetweennessCentrality	ClosenessCentrality	ClusteringCoefficient	Degree	Eccentricity	Radiality	Stress	TopologicalCoefficient
k__Fungi.p__Ascomycota.c__Leotiomycetes.o__Helotiales.f__Hyaloscyphaceae.__	2.19788	0.0604748	0.454984	0.259797	53	5	0.977398	63620	0.131879
k__Fungi.p__Ascomycota.c__Eurotiomycetes.o__Eurotiales.f__Aspergillaceae.g__Penicillium	2.24028	0.04737	0.446372	0.273725	51	5	0.976598	47616	0.138189
d__Bacteria.p__Bacteroidota.c__Bacteroidia.o__Cytophagales.f__Microscillaceae.g__Ohtaekwangia	2.32155	0.0216165	0.430746	0.409412	51	5	0.975065	28362	0.193044
d__Bacteria.p__Bacteroidota.c__Bacteroidia.o__Cytophagales.f__Microscillaceae.g__Chryseolinea	2.35689	0.0301293	0.424288	0.395294	51	5	0.974398	34284	0.181312
d__Bacteria.p__Proteobacteria.c__Alphaproteobacteria.o__Caulobacterales.f__Hyphomonadaceae.__	2.36396	0.0165779	0.423019	0.443922	51	5	0.974265	22542	0.196931
d__Bacteria.p__Myxococcota.c__Polyangia.o__Polyangiales.f__BIrii41.g__BIrii41	2.27562	0.0163853	0.439441	0.437551	50	5	0.975932	26988	0.186257
d__Bacteria.p__Chloroflexi.c__Chloroflexia.o__Chloroflexales.f__Roseiflexaceae.g__uncultured	2.31802	0.0196857	0.431402	0.431837	50	5	0.975132	29040	0.196686
d__Bacteria.p__Actinobacteriota.c__Acidimicrobiia.o__IMCC26256.f__IMCC26256.g__IMCC26256	2.38869	0.014919	0.418639	0.447347	50	5	0.973798	22670	0.200755
k__Fungi.p__Ascomycota.c__Leotiomycetes.o__Helotiales.f__Ploettnerulaceae.g__Cadophora	2.29682	0.0407795	0.435385	0.283996	47	5	0.975532	52946	0.154772
d__Bacteria.p__Proteobacteria.c__Gammaproteobacteria.o__R7C24.f__R7C24.g__R7C24	2.35689	0.00836249	0.424288	0.506938	47	5	0.974398	17932	0.210301
d__Bacteria.p__Proteobacteria.c__Alphaproteobacteria.o__Caulobacterales.f__Hyphomonadaceae.g__uncultured	2.42049	0.0168336	0.413139	0.485024	46	5	0.973198	24366	0.209617
d__Bacteria.p__Bacteroidota.c__Bacteroidia.o__Chitinophagales.f__Chitinophagaceae.g__Niastella	2.28975	0.0176003	0.436728	0.421212	45	5	0.975665	28552	0.194257
d__Bacteria.p__Proteobacteria.c__Alphaproteobacteria.o__Caulobacterales.f__Hyphomonadaceae.g__SWB02	2.4629	0.00672061	0.406026	0.542283	44	5	0.972398	13982	0.232254
d__Bacteria.p__Actinobacteriota.c__Actinobacteria.o__Frankiales.f__Frankiaceae.g__Frankia	2.32155	0.0184194	0.430746	0.408638	43	5	0.975065	27066	0.198621
d__Bacteria.p__Actinobacteriota.c__Actinobacteria.o__Micromonosporales.f__Micromonosporaceae.__	2.40636	0.0094323	0.415565	0.512735	43	4	0.973465	14390	0.216756
d__Bacteria.p__Actinobacteriota.c__Thermoleophilia.o__Gaiellales.f__uncultured.g__uncultured	2.43816	0.0113855	0.410145	0.447398	43	5	0.972865	19364	0.208245
d__Bacteria.p__Actinobacteriota.c__Actinobacteria.o__Streptomycetales.f__Streptomycetaceae.g__Streptomyces	2.40283	0.009024	0.416176	0.446341	41	5	0.973532	17088	0.215007
d__Bacteria.p__Bacteroidota.c__Bacteroidia.o__Chitinophagales.f__Chitinophagaceae.g__Terrimonas	2.4735	0.00405961	0.404286	0.592308	40	5	0.972198	8374	0.236424
k__Fungi.p__Ascomycota.c__Lecanoromycetes.o__Ostropales.f__unidentified.g__unidentified	2.28975	0.0168165	0.436728	0.466937	39	4	0.975665	23084	0.201834
d__Bacteria.p__Actinobacteriota.c__Actinobacteria.o__Kineosporiales.f__Kineosporiaceae.g__Kineosporia	2.54417	0.0145199	0.393056	0.460189	39	5	0.970865	17468	0.22533
d__Bacteria.p__Proteobacteria.c__Alphaproteobacteria.o__Rhodospirillales.f__Magnetospirillaceae.g__uncultured	2.34982	0.0620529	0.425564	0.219061	38	5	0.974532	43220	0.118036
d__Bacteria.p__Actinobacteriota.c__Actinobacteria.o__Frankiales.f__Sporichthyaceae.g__uncultured	2.4947	0.0120731	0.40085	0.588905	38	5	0.971798	11468	0.236842
d__Bacteria.p__Proteobacteria.c__Gammaproteobacteria.o__Cellvibrionales.f__Cellvibrionaceae.g__Cellvibrio	2.41343	0.0228979	0.414348	0.405405	37	4	0.973332	20950	0.192288
k__Fungi.p__Ascomycota.c__Leotiomycetes.o__Helotiales.f__Myxotrichaceae.g__Amorphotheca	2.41343	0.0301248	0.414348	0.390476	36	4	0.973332	26740	0.192641
k__Fungi.p__Ascomycota.c__Leotiomycetes.o__Helotiales.f__Helotiaceae.g__Meliniomyces	2.37102	0.0302025	0.421759	0.314286	35	5	0.974132	29222	0.15057
k__Fungi.p__Basidiomycota.c__Agaricomycetes.o__Agaricales.f__Tricholomataceae.g__Flagelloscypha	2.41343	0.011368	0.414348	0.452101	35	5	0.973332	15086	0.214907
d__Bacteria.p__Actinobacteriota.c__Actinobacteria.o__Micromonosporales.f__Micromonosporaceae.g__Actinoplanes	2.5477	0.0106943	0.39251	0.512605	35	5	0.970798	12730	0.237539
d__Bacteria.p__Proteobacteria.c__Alphaproteobacteria.o__Rhizobiales.f__Rhizobiales_Incertae_Sedis.g__uncultured	2.58657	0.00916699	0.386612	0.575758	34	5	0.970065	12258	0.2522
k__Fungi.p__Mortierellomycota.c__Mortierellomycetes.o__Mortierellales.f__Mortierellaceae.g__Podila	2.37809	0.0196455	0.420505	0.325758	33	5	0.973998	18922	0.155639
d__Bacteria.p__Cyanobacteria.c__Vampirivibrionia.o__Vampirovibrionales.f__Vampirovibrionaceae.g__Vampirovibrio	2.38163	0.00792631	0.419881	0.460227	33	5	0.973932	13908	0.20525
k__Fungi.p__Basidiomycota.c__Tremellomycetes.o__Filobasidiales.f__Piskurozymaceae.g__Solicoccozyma	2.43463	0.0185969	0.41074	0.354839	32	5	0.972932	20554	0.155291
k__Fungi.p__Ascomycota.c__Sordariomycetes.o__Sordariales.f__Chaetomiaceae.g__Chaetomidium	2.5159	0.00977344	0.397472	0.568548	32	5	0.971398	13750	0.239726
d__Bacteria.p__Proteobacteria.c__Gammaproteobacteria.o__Steroidobacterales.f__Steroidobacteraceae.g__Steroidobacter	2.54064	0.00368926	0.393602	0.641129	32	5	0.970931	6432	0.252216
d__Bacteria.p__Proteobacteria.c__Alphaproteobacteria.o__Elsterales.f__Elsteraceae.g__Aliidongia	2.45936	0.0142123	0.406609	0.329032	31	5	0.972465	15168	0.173361
d__Bacteria.p__Actinobacteriota.c__Actinobacteria.o__Frankiales.f__Cryptosporangiaceae.g__Cryptosporangium	2.4735	0.0206656	0.404286	0.384946	31	5	0.972198	20430	0.197343
d__Bacteria.p__Actinobacteriota.c__Actinobacteria.o__Micrococcales.f__Cellulomonadaceae.g__Cellulomonas	2.51943	0.00351896	0.396914	0.630108	31	5	0.971331	6450	0.255617
d__Bacteria.p__Proteobacteria.c__Alphaproteobacteria.o__Caulobacterales.f__Hyphomonadaceae.g__Hirschia	2.61131	0.0105823	0.38295	0.587097	31	5	0.969598	16688	0.264359
d__Bacteria.p__Proteobacteria.c__Alphaproteobacteria.o__Sphingomonadales.f__Sphingomonadaceae.g__Parablastomonas	2.38163	0.0169739	0.419881	0.367816	30	5	0.973932	17446	0.167446
k__Fungi.p__Basidiomycota.c__Agaricomycetes.o__Agaricales.f__Psathyrellaceae.g__Coprinopsis	2.4523	0.00934868	0.407781	0.501149	30	5	0.972598	11970	0.228387
k__Fungi.p__Ascomycota.c__Saccharomycetes.o__Saccharomycetales.f__Lipomycetaceae.g__Dipodascopsis	2.46643	0.0319762	0.405444	0.31954	30	5	0.972331	28066	0.150743
k__Fungi.p__Ascomycota.c__Sordariomycetes.o__Hypocreales.f__Nectriaceae.g__Dactylonectria	2.53004	0.008039	0.395251	0.367816	30	5	0.971131	10656	0.168506
d__Bacteria.p__Proteobacteria.c__Gammaproteobacteria.o__Burkholderiales.f__Comamonadaceae.g__Rhizobacter	2.61131	0.00715373	0.38295	0.551724	30	5	0.969598	9608	0.252688
d__Bacteria.p__Bacteroidota.c__Bacteroidia.o__Chitinophagales.f__Chitinophagaceae.g__Filimonas	2.4417	0.0158468	0.409551	0.366995	29	5	0.972798	17334	0.185372
d__Bacteria.p__Actinobacteriota.c__Actinobacteria.o__Frankiales.f__Acidothermaceae.g__Acidothermus	2.45583	0.0106706	0.407194	0.359606	29	5	0.972532	12508	0.185372
d__Bacteria.p__Actinobacteriota.c__Actinobacteria.o__Micrococcales.f__Microbacteriaceae.g__Microbacterium	2.5159	0.00490972	0.397472	0.522167	29	5	0.971398	7602	0.232874
d__Bacteria.p__Actinobacteriota.c__Actinobacteria.o__Propionibacteriales.f__Nocardioidaceae.g__Marmoricola	2.52297	0.00501081	0.396359	0.598522	29	5	0.971265	8370	0.260404
d__Bacteria.p__Bacteroidota.c__Bacteroidia.o__Chitinophagales.f__Chitinophagaceae.g__Ferruginibacter	2.56537	0.0107692	0.389807	0.576355	29	5	0.970465	14456	0.252009
d__Bacteria.p__Proteobacteria.c__Alphaproteobacteria.o__Rhizobiales.f__Labraceae.g__Labrys	2.61131	0.0232449	0.38295	0.330049	29	5	0.969598	25990	0.199892
d__Bacteria.p__Proteobacteria.c__Alphaproteobacteria.o__Rhizobiales.f__Xanthobacteraceae.g__Afipia	2.4523	0.00887856	0.407781	0.388889	28	4	0.972598	11442	0.181797
k__Fungi.p__Ascomycota.c__Sordariomycetes.o__Atractosporales.f__Conlariaceae.g__Conlarium	2.65371	0.00657918	0.376831	0.584046	27	5	0.968798	7574	0.277931
d__Bacteria.p__Proteobacteria.c__Gammaproteobacteria.o__Xanthomonadales.f__Xanthomonadaceae.__	2.4947	0.00571104	0.40085	0.421538	26	5	0.971798	8826	0.196833
k__Fungi.p__Basidiomycota.c__Tremellomycetes.o__Tremellales.f__Trimorphomycetaceae.g__Saitozyma	2.56537	0.0140748	0.389807	0.369231	26	5	0.970465	14894	0.176648
k__Fungi.p__Basidiomycota.c__Agaricomycetes.o__Boletales.f__Boletales_fam_Incertae_sedis.g__Hydnomerulius	2.57244	0.0164684	0.388736	0.363077	26	5	0.970331	15712	0.170746
k__Fungi.p__Ascomycota.c__Sordariomycetes.o__Hypocreales.f__Nectriaceae.g__Cylindrocladiella	2.63958	0.0155836	0.378849	0.323077	26	6	0.969065	13500	0.159951
d__Bacteria.p__Myxococcota.c__Polyangia.o__Haliangiales.f__Haliangiaceae.g__Haliangium	2.70671	0.0118223	0.369452	0.609231	26	5	0.967798	12224	0.293645
d__Bacteria.p__Proteobacteria.c__Alphaproteobacteria.o__Rhizobiales.f__Xanthobacteraceae.g__Azorhizobium	2.45936	0.00811641	0.406609	0.346667	25	5	0.972465	10422	0.188354
k__Fungi.p__Ascomycota.c__Sordariomycetes.o__Chaetosphaeriales.f__Chaetosphaeriaceae.g__Chaetosphaeria	2.5477	0.0168516	0.39251	0.313333	25	5	0.970798	15862	0.181007
k__Fungi.p__Ascomycota.c__Sordariomycetes.o__Hypocreales.f__Nectriaceae.g__Nectria	2.56537	0.00716404	0.389807	0.41	25	5	0.970465	8748	0.18058
d__Bacteria.p__Proteobacteria.c__Gammaproteobacteria.o__Gammaproteobacteria_Incertae_Sedis.f__Unknown_Family.g__Acidibacter	2.61837	0.00578925	0.381916	0.58	25	5	0.969465	8172	0.263125
d__Bacteria.p__Proteobacteria.c__Alphaproteobacteria.o__Dongiales.f__Dongiaceae.g__Dongia	2.55124	0.0053499	0.391967	0.547101	24	5	0.970731	7742	0.267032
k__Fungi.p__Ascomycota.c__Leotiomycetes.o__Helotiales.f__Dermateaceae.g__Diplocarpa	2.59011	0.033387	0.386085	0.268116	24	5	0.969998	23198	0.14391
d__Bacteria.p__Myxococcota.c__Polyangia.o__Polyangiales.f__Polyangiaceae.g__Aetherobacter	2.61484	0.0114078	0.382432	0.336957	24	5	0.969531	11964	0.194231
k__Fungi.p__Basidiomycota.c__Agaricomycetes.o__Agaricales.f__Mycenaceae.g__Mycena	2.66784	0.00415011	0.374834	0.40942	24	6	0.968531	5176	0.1875
d__Bacteria.p__Proteobacteria.c__Alphaproteobacteria.o__Caulobacterales.f__Caulobacteraceae.g__Phenylobacterium	2.53004	0.0137344	0.395251	0.442688	23	5	0.971131	12462	0.22192
d__Bacteria.p__Actinobacteriota.c__Actinobacteria.o__Micrococcales.f__Promicromonosporaceae.g__Promicromonospora	2.70671	0.00299717	0.369452	0.711462	23	5	0.967798	3622	0.318336
d__Bacteria.p__Cyanobacteria.c__Vampirivibrionia.o__Vampirovibrionales.f__Vampirovibrionaceae.g__Vampirovibrionaceae	2.5583	0.00701476	0.390884	0.38961	22	5	0.970598	7160	0.168923
k__Fungi.p__Ascomycota.c__Sordariomycetes.o__Hypocreales.f__Nectriaceae.g__Volutella	2.61131	0.00800653	0.38295	0.5671	22	5	0.969598	6972	0.260298
d__Bacteria.p__Bacteroidota.c__Bacteroidia.o__Cytophagales.f__Cytophagaceae.g__Cytophaga	2.63251	0.0108582	0.379866	0.376623	22	5	0.969198	9416	0.217407
k__Fungi.p__Ascomycota.c__Sordariomycetes.o__Microascales.f__Microascaceae.g__Petriella	2.76678	0.0160853	0.36143	0.333333	22	5	0.966664	17274	0.187446
d__Bacteria.p__Proteobacteria.c__Alphaproteobacteria.o__Micropepsales.f__Micropepsaceae.g__uncultured	2.68198	0.00626909	0.372859	0.390476	21	5	0.968265	6210	0.186441
d__Bacteria.p__Bacteroidota.c__Bacteroidia.o__Cytophagales.f__Microscillaceae.g__uncultured	2.70318	0.00399835	0.369935	0.547619	21	5	0.967865	4658	0.287415
k__Fungi.p__Ascomycota.c__Leotiomycetes.o__Helotiales.f__Helotiales_fam_Incertae_sedis.g__Mycoarthris	2.71025	0.00742083	0.36897	0.333333	21	5	0.967731	6008	0.164116
k__Fungi.p__Ascomycota.c__Eurotiomycetes.o__Chaetothyriales.f__Herpotrichiellaceae.g__Cladophialophora	2.71731	0.00931786	0.36801	0.433333	21	5	0.967598	7884	0.214993
k__Fungi.p__Basidiomycota.c__Agaricomycetes.o__Sebacinales.f__Serendipitaceae.g__Serendipita	2.50177	0.00745136	0.399718	0.384211	20	5	0.971665	7270	0.199351
d__Bacteria.p__Bacteroidota.c__Bacteroidia.o__Sphingobacteriales.f__Sphingobacteriaceae.g__Mucilaginibacter	2.5583	0.0248562	0.390884	0.268421	20	5	0.970598	16574	0.154082
k__Fungi.p__Basidiomycota.c__Microbotryomycetes.o__Sporidiobolales.f__Sporidiobolaceae.g__Sporobolomyces	2.57951	0.00401502	0.387671	0.489474	20	5	0.970198	6208	0.218705
d__Bacteria.p__Proteobacteria.c__Alphaproteobacteria.o__Rhizobiales.__.__	2.63251	0.0170378	0.379866	0.321053	20	6	0.969198	11426	0.152016
k__Fungi.p__Ascomycota.c__Dothideomycetes.o__Dothideales.f__Dothideales_fam_Incertae_sedis.g__unidentified	2.69611	0.0188851	0.370904	0.289474	20	6	0.967998	14650	0.163445
k__Fungi.p__Ascomycota.c__Leotiomycetes.o__Helotiales.f__Dermateaceae.g__Davidhawksworthia	2.74912	0.00317455	0.363753	0.457895	20	6	0.966998	3332	0.206542
k__Fungi.p__Ascomycota.c__Sordariomycetes.__.__.__	2.58657	0.00641883	0.386612	0.368421	19	5	0.970065	6852	0.202216
d__Bacteria.p__Acidobacteriota.c__Acidobacteriae.o__Acidobacteriales.f__Acidobacteriaceae_.Subgroup_1..g__Granulicella	2.60777	0.0078568	0.383469	0.385965	19	5	0.969665	6974	0.18325
k__Fungi.p__Ascomycota.c__Sordariomycetes.o__Coniochaetales.f__Coniochaetaceae.g__Coniochaeta	2.62544	0.0061386	0.380888	0.391813	19	5	0.969331	6482	0.185617
k__Fungi.p__Ascomycota.c__Sordariomycetes.o__Sordariales.f__Sordariaceae.__	2.65371	0.00688195	0.376831	0.45614	19	6	0.968798	7312	0.236842
d__Bacteria.p__Bdellovibrionota.c__Bdellovibrionia.o__Bacteriovoracales.f__Bacteriovoracaceae.g__Bacteriovorax	2.57597	0.00243118	0.388203	0.509804	18	5	0.970265	4008	0.227818
d__Bacteria.p__Actinobacteriota.c__Actinobacteria.o__Propionibacteriales.__.__	2.59364	0.00551912	0.385559	0.45098	18	5	0.969931	5726	0.188159
d__Bacteria.p__Proteobacteria.c__Gammaproteobacteria.o__Burkholderiales.f__Alcaligenaceae.__	2.64311	0.0106115	0.378342	0.339869	18	5	0.968998	7632	0.154514
k__Fungi.p__Ascomycota.c__Sordariomycetes.o__Microascales.f__Microascaceae.g__Parascedosporium	2.64664	0.0304288	0.377837	0.150327	18	5	0.968931	18024	0.133421
k__Fungi.p__Ascomycota.c__Eurotiomycetes.o__Chaetothyriales.f__Herpotrichiellaceae.g__Thysanorea	2.64664	0.00616584	0.377837	0.48366	18	5	0.968931	5068	0.194653
d__Bacteria.p__Proteobacteria.c__Gammaproteobacteria.o__Burkholderiales.f__Burkholderiaceae.__	2.68198	0.00547838	0.372859	0.418301	18	5	0.968265	5978	0.193487
k__Fungi.p__Ascomycota.c__Sordariomycetes.o__Pseudodactylariales.f__Pseudodactylariaceae.g__Pseudodactylaria	2.70318	0.00848557	0.369935	0.339869	18	5	0.967865	6768	0.18254
k__Fungi.p__Basidiomycota.c__Agaricomycetes.o__unidentified.f__unidentified.g__unidentified	2.73145	0.0094121	0.366106	0.326797	18	5	0.967331	8920	0.183286
d__Bacteria.p__Bacteroidota.c__Bacteroidia.o__Chitinophagales.f__Chitinophagaceae.__	2.79859	0.00279052	0.357323	0.594771	18	5	0.966064	4054	0.31164
k__Fungi.p__Ascomycota.c__Sordariomycetes.o__Hypocreales.f__Nectriaceae.g__Cylindrodendrum	2.77385	0.00255414	0.36051	0.492647	17	6	0.966531	2562	0.205042
k__Fungi.p__Basidiomycota.c__Tremellomycetes.o__Trichosporonales.f__Trichosporonaceae.g__Apiotrichum	2.80565	0.00393279	0.356423	0.522059	17	6	0.965931	4074	0.222089
k__Fungi.p__Ascomycota.__.__.__.__	2.83039	0.00567304	0.353308	0.441176	17	5	0.965464	7574	0.198529
k__Fungi.p__Ascomycota.c__Dothideomycetes.o__Pleosporales.f__Melanommataceae.g__Pleotrichocladium	2.83746	0.00486719	0.352428	0.382353	17	6	0.965331	3974	0.188914
d__Bacteria.p__Bdellovibrionota.c__Bdellovibrionia.o__Bdellovibrionales.f__Bdellovibrionaceae.g__Bdellovibrio	2.89399	0.0120502	0.345543	0.345588	17	6	0.964264	8508	0.172927
k__Fungi.p__Ascomycota.c__Sordariomycetes.o__Xylariales.f__Bartaliniaceae.g__Truncatella	2.67491	0.0182274	0.373844	0.166667	16	5	0.968398	11734	0.135742
k__Fungi.p__Basidiomycota.c__Agaricomycetes.o__Hymenochaetales.f__unidentified.g__unidentified	2.61131	0.00246575	0.38295	0.52381	15	5	0.969598	3294	0.249744
k__Fungi.p__Ascomycota.c__Sordariomycetes.o__Ophiostomatales.f__Ophiostomataceae.g__Hawksworthiomyces	2.66078	0.00161238	0.37583	0.485714	15	5	0.968665	2192	0.218605
k__Fungi.p__Ascomycota.c__Leotiomycetes.o__Helotiales.f__Helotiaceae.g__Infundichalara	2.78445	0.013799	0.359137	0.342857	15	5	0.966331	11138	0.201961
k__Fungi.p__Ascomycota.c__Dothideomycetes.o__Pleosporales.f__Pleosporales_fam_Incertae_sedis.g__Berkleasmium	2.79505	0.00519645	0.357775	0.438095	15	6	0.966131	3528	0.209901
d__Bacteria.p__Actinobacteriota.c__Actinobacteria.o__Frankiales.f__Frankiaceae.g__Jatrophihabitans	2.87986	0.00434771	0.347239	0.419048	15	6	0.964531	3180	0.193258
d__Bacteria.p__Bacteroidota.c__Bacteroidia.o__Sphingobacteriales.f__KD3.93.g__KD3.93	2.63251	0.00704456	0.379866	0.318681	14	5	0.969198	5036	0.190848
k__Fungi.p__Ascomycota.c__Sordariomycetes.o__Hypocreales.f__Nectriaceae.g__Ilyonectria	2.84099	0.00177371	0.35199	0.494505	14	5	0.965264	1848	0.246356
k__Fungi.p__Ascomycota.c__Sordariomycetes.o__Sordariales.f__Chaetomiaceae.g__Dichotomopilus	2.92226	0.00664656	0.342201	0.527473	14	6	0.963731	9402	0.232773
k__Fungi.p__Ascomycota.c__Sordariomycetes.o__Hypocreales.f__Bionectriaceae.g__Clonostachys	2.66784	0.00603688	0.374834	0.320513	13	6	0.968531	5290	0.192899
k__Fungi.p__Ascomycota.c__Sordariomycetes.o__Ophiostomatales.f__Ophiostomataceae.g__Sporothrix	2.73145	0.00416953	0.366106	0.5	13	5	0.967331	4476	0.236029
k__Fungi.p__Basidiomycota.c__Agaricomycetes.o__Cantharellales.f__Hydnaceae.g__Sistotrema	2.76325	0.00249318	0.361893	0.307692	13	5	0.966731	3048	0.2139
k__Fungi.p__Basidiomycota.c__Agaricomycetes.o__Agaricales.f__Entolomataceae.g__Clitopilus	2.78799	0.00904697	0.358682	0.346154	13	5	0.966264	9418	0.197203
k__Fungi.p__Basidiomycota.c__Agaricomycetes.o__Auriculariales.f__Auriculariales_fam_Incertae_sedis.g__Renatobasidium	2.79152	0.0188976	0.358228	0.192308	13	5	0.966198	13786	0.149321
d__Bacteria.p__Verrucomicrobiota.c__Verrucomicrobiae.o__Opitutales.f__Opitutaceae.__	2.81979	0.00638467	0.354637	0.217949	13	5	0.965664	4792	0.174556
k__Fungi.p__Basidiomycota.c__Tremellomycetes.o__Tremellales.f__Bulleribasidiaceae.g__Vishniacozyma	3.19081	0.0167351	0.3134	0.307692	13	6	0.958664	8270	0.175824
k__Fungi.p__Ascomycota.c__Saccharomycetes.o__Saccharomycetales.f__Trichomonascaceae.g__Sugiyamaella	2.73145	0.0028256	0.366106	0.378788	12	5	0.967331	2978	0.205409
k__Fungi.p__Ascomycota.c__Sordariomycetes.o__Chaetosphaeriales.f__Chaetosphaeriaceae.g__Chloridium	2.74205	0.00138718	0.364691	0.560606	12	5	0.967131	1642	0.242232
k__Fungi.p__Basidiomycota.c__Agaricomycetes.o__Sebacinales.__.__	2.81979	0.0251201	0.354637	0.272727	12	5	0.965664	22790	0.19244
d__Bacteria.p__Myxococcota.c__Polyangia.o__Polyangiales.f__Polyangiaceae.__	2.81979	0.0145218	0.354637	0.242424	12	5	0.965664	7620	0.179412
k__Fungi.p__Basidiomycota.c__Tremellomycetes.o__Filobasidiales.f__Filobasidiaceae.g__Filobasidium	2.90813	0.0226324	0.343864	0.363636	12	5	0.963998	19700	0.189394
k__Fungi.p__Ascomycota.c__Dothideomycetes.o__Dothideales.f__Saccotheciaceae.g__Aureobasidium	2.69258	0.0106035	0.371391	0.418182	11	5	0.968065	8302	0.220455
k__Fungi.p__Basidiomycota.c__Agaricomycetes.o__Auriculariales.f__Auriculariales_fam_Incertae_sedis.g__Oliveonia	2.78445	0.00805438	0.359137	0.436364	11	5	0.966331	7168	0.245791
d__Bacteria.p__Bacteroidota.c__Bacteroidia.o__Flavobacteriales.f__Flavobacteriaceae.__	2.78445	0.00365016	0.359137	0.309091	11	5	0.966331	3904	0.217703
k__Fungi.p__Ascomycota.c__Leotiomycetes.o__Helotiales.f__Myxotrichaceae.g__Oidiodendron	2.80212	0.00139229	0.356873	0.454545	11	5	0.965998	1528	0.254154
k__Fungi.p__Ascomycota.c__Leotiomycetes.o__Helotiales.f__Dermateaceae.g__Pyrenopeziza	2.80565	0.00273697	0.356423	0.327273	11	5	0.965931	2880	0.219554
k__Fungi.p__Ascomycota.c__Sordariomycetes.o__Sordariales.f__Chaetomiaceae.g__Zopfiella	2.81272	0.000304698	0.355528	0.563636	11	5	0.965798	518	0.326599
k__Fungi.p__Basidiomycota.c__Tremellomycetes.o__Cystofilobasidiales.f__Mrakiaceae.g__Itersonilia	2.83392	0.00928402	0.352868	0.436364	11	5	0.965398	8056	0.221818
k__Fungi.p__Mortierellomycota.c__Mortierellomycetes.o__Mortierellales.f__Mortierellaceae.g__Linnemannia	2.86926	0.000994947	0.348522	0.545455	11	6	0.964731	1178	0.251172
k__Fungi.p__Basidiomycota.c__Agaricomycetes.o__Agaricales.f__Strophariaceae.g__Kuehneromyces	2.90459	0.00288033	0.344282	0.254545	11	5	0.964064	1792	0.217602
k__Fungi.p__Ascomycota.c__Leotiomycetes.o__Helotiales.f__Hyaloscyphaceae.g__Hyaloscypha	2.91519	0.00883175	0.34303	0.309091	11	6	0.963864	6188	0.197492
d__Bacteria.p__Proteobacteria.c__Alphaproteobacteria.o__Caulobacterales.f__Caulobacteraceae.g__Asticcacaulis	2.93286	0.0102251	0.340964	0.418182	11	6	0.963531	6198	0.241342
k__Fungi.p__Ascomycota.c__Dothideomycetes.o__Pleosporales.f__Didymellaceae.__	2.947	0.00314696	0.339329	0.436364	11	6	0.963264	2314	0.196172
d__Bacteria.p__Proteobacteria.c__Alphaproteobacteria.o__Caulobacterales.f__Caulobacteraceae.g__uncultured	3	0.00526051	0.333333	0.454545	11	6	0.962264	3412	0.234644
k__Fungi.p__Basidiomycota.c__Tremellomycetes.o__Tremellales.f__Cryptococcaceae.g__Cryptococcus	3.11307	0.0141225	0.321226	0.2	11	6	0.960131	8332	0.164773
k__Fungi.p__Ascomycota.c__Leotiomycetes.o__Thelebolales.f__Pseudeurotiaceae.g__unidentified	3.12014	0.010304	0.320498	0.381818	11	5	0.959997	6300	0.198182
k__Fungi.p__Basidiomycota.c__Tremellomycetes.o__Cystofilobasidiales.f__Cystofilobasidiaceae.g__Cystofilobasidium	3.29329	0.0211261	0.303648	0.272727	11	6	0.95673	12480	0.17759
d__Bacteria.p__Proteobacteria.c__Alphaproteobacteria.o__Micavibrionales.f__uncultured.g__uncultured	2.82332	0.00127947	0.354193	0.422222	10	5	0.965598	1288	0.227184
k__Fungi.p__Ascomycota.c__Leotiomycetes.o__Helotiales.f__Helotiaceae.g__Tetracladium	2.82686	0.000894895	0.35375	0.511111	10	6	0.965531	1062	0.246535
d__Bacteria.p__Proteobacteria.c__Alphaproteobacteria.o__Rhizobiales.f__Beijerinckiaceae.g__Bosea	2.83039	0.000298728	0.353308	0.577778	10	5	0.965464	582	0.341748
d__Bacteria.p__Verrucomicrobiota.c__Verrucomicrobiae.o__Opitutales.f__Opitutaceae.g__IMCC26134	2.87986	0.00291082	0.347239	0.377778	10	5	0.964531	2780	0.288172
k__Fungi.p__Ascomycota.c__Dothideomycetes.o__Venturiales.f__Sympoventuriaceae.g__Pseudosigmoidea	2.90813	0.0219019	0.343864	0.244444	10	5	0.963998	14256	0.184524
d__Bacteria.p__Bacteroidota.c__Bacteroidia.o__Chitinophagales.f__Chitinophagaceae.g__Pseudoflavitalea	2.91873	1.47416e-06	0.342615	0.977778	10	6	0.963798	2	0.455056
d__Bacteria.p__Proteobacteria.c__Alphaproteobacteria.o__Sphingomonadales.f__Sphingomonadaceae.g__Novosphingobium	2.92226	0.0232557	0.342201	0.133333	10	6	0.963731	13524	0.152381
d__Bacteria.p__Bacteroidota.c__Bacteroidia.o__Chitinophagales.f__Chitinophagaceae.g__Puia	2.9364	0.00850077	0.340554	0.311111	10	5	0.963464	4466	0.226744
d__Bacteria.p__Planctomycetota.c__Phycisphaerae.o__Tepidisphaerales.f__WD2101_soil_group.g__WD2101_soil_group	2.96466	0.000706642	0.337306	0.577778	10	6	0.962931	1054	0.372222
k__Fungi.p__Ascomycota.c__Pezizomycotina_cls_Incertae_sedis.o__Pezizomycotina_ord_Incertae_sedis.f__Pezizomycotina_fam_Incertae_sedis.g__Tricellula	3.01767	0.00428902	0.331382	0.444444	10	6	0.961931	2842	0.219697
d__Bacteria.p__Proteobacteria.c__Gammaproteobacteria.o__Burkholderiales.f__Oxalobacteraceae.g__Duganella	2.82686	0.0171279	0.35375	0.111111	9	5	0.965531	10156	0.176123
d__Bacteria.p__Proteobacteria.c__Alphaproteobacteria.o__Elsterales.f__Elsteraceae.__	2.87279	0.00523339	0.348093	0.25	9	5	0.964664	3686	0.201235
k__Fungi.p__Ascomycota.c__Sordariomycetes.o__Glomerellales.f__Plectosphaerellaceae.g__Acrostalagmus	2.87633	0.0127356	0.347666	0.277778	9	5	0.964598	7276	0.263593
k__Fungi.p__Basidiomycota.c__Geminibasidiomycetes.o__Geminibasidiales.f__Geminibasidiaceae.g__Geminibasidium	2.91873	0.00194931	0.342615	0.333333	9	5	0.963798	1798	0.27718
d__Bacteria.p__Verrucomicrobiota.c__Verrucomicrobiae.o__Methylacidiphilales.f__Methylacidiphilaceae.g__uncultured	2.92933	0.00196301	0.341375	0.305556	9	5	0.963598	1382	0.206897
k__Fungi.p__Basidiomycota.c__Agaricomycetes.o__Tremellodendropsidales.f__unidentified.g__unidentified	2.9894	0.00951635	0.334515	0.583333	9	6	0.962464	10916	0.387464
d__Bacteria.p__Bacteroidota.c__Bacteroidia.o__Cytophagales.f__Microscillaceae.__	3.04594	0.000350114	0.328306	0.75	9	5	0.961397	418	0.456456
d__Bacteria.p__Proteobacteria.c__Alphaproteobacteria.__.__.__	3.09187	0.00686143	0.323429	0.444444	9	6	0.960531	3764	0.216573
k__Fungi.p__Basidiomycota.c__Tremellomycetes.o__Filobasidiales.f__Piskurozymaceae.g__Piskurozyma	3.56537	0.0032436	0.280476	0.388889	9	6	0.951597	2988	0.306667
k__Fungi.p__Ascomycota.c__Sordariomycetes.o__Hypocreales.f__Hypocreales_fam_Incertae_sedis.g__Acremonium	2.75972	0.00758837	0.362356	0.357143	8	5	0.966798	5046	0.243243
d__Bacteria.p__Proteobacteria.c__Alphaproteobacteria.o__Rhizobiales.f__Xanthobacteraceae.g__Rhodopseudomonas	2.82332	0.00200364	0.354193	0.178571	8	5	0.965598	1414	0.204208
d__Bacteria.p__Proteobacteria.c__Gammaproteobacteria.o__Legionellales.f__Legionellaceae.g__Legionella	2.86926	0.00027302	0.348522	0.392857	8	6	0.964731	372	0.253989
d__Bacteria.p__Spirochaetota.c__Spirochaetia.o__Spirochaetales.f__Spirochaetaceae.g__Spirochaeta_2	2.9788	0.00727528	0.335706	0.321429	8	6	0.962664	4650	0.224662
k__Fungi.p__Basidiomycota.c__Agaricomycetes.o__Cantharellales.f__Hydnaceae.g__unidentified	2.99293	0.012498	0.33412	0.214286	8	5	0.962397	9316	0.209337
d__Bacteria.p__Proteobacteria.c__Gammaproteobacteria.o__Burkholderiales.f__Methylophilaceae.__	3.0212	0.00815371	0.330994	0.178571	8	5	0.961864	5342	0.241883
d__Bacteria.p__Actinobacteriota.c__Thermoleophilia.o__Solirubrobacterales.f__Solirubrobacteraceae.g__Conexibacter	3.0318	0.00577255	0.329837	0.392857	8	5	0.961664	4304	0.31338
k__Fungi.p__Basidiomycota.c__Microbotryomycetes.__.__.__	3.07067	0.00407386	0.325662	0.571429	8	5	0.960931	3854	0.243952
k__Fungi.p__Basidiomycota.c__Microbotryomycetes.o__Leucosporidiales.f__Leucosporidiaceae.g__Leucosporidium	3.22968	0.0048093	0.309628	0.428571	8	5	0.957931	3326	0.246429
k__Fungi.p__Ascomycota.c__Dothideomycetes.o__Capnodiales.f__Cladosporiaceae.g__Cladosporium	3.29329	0.00856995	0.303648	0.214286	8	6	0.95673	3002	0.2
k__Fungi.p__Ascomycota.c__Leotiomycetes.o__Helotiales.f__Leotiaceae.g__Alatospora	2.89046	0.000928002	0.345966	0.380952	7	5	0.964331	1044	0.239203
k__Fungi.p__Basidiomycota.c__Agaricomycetes.o__Agaricales.f__Hymenogastraceae.g__Gymnopilus	3.03534	0	0.329453	1	7	6	0.961597	0	0.367063
d__Bacteria.p__Proteobacteria.c__Gammaproteobacteria.o__Burkholderiales.f__Burkholderiaceae.g__Burkholderia.Caballeronia.Paraburkholderia	3.08481	0.00758815	0.32417	0.333333	7	6	0.960664	4458	0.23185
k__Fungi.p__Ascomycota.c__Leotiomycetes.o__Helotiales.f__Hyaloscyphaceae.g__Arachnopeziza	3.09541	0.0106418	0.323059	0.142857	7	5	0.960464	5756	0.186636
d__Bacteria.p__Planctomycetota.c__Phycisphaerae.o__Tepidisphaerales.f__Tepidisphaeraceae.g__Tepidisphaeraceae	3.20141	0.00227706	0.312362	0.52381	7	5	0.958464	2196	0.338624
d__Bacteria.p__Proteobacteria.c__Alphaproteobacteria.o__Rhizobiales.f__Xanthobacteraceae.g__Bradyrhizobium	3.22968	0.00195833	0.309628	0.571429	7	5	0.957931	1704	0.314286
k__Fungi.p__Basidiomycota.c__Agaricomycetes.o__Agaricales.f__Agaricales_fam_Incertae_sedis.g__Disporotrichum	3.23675	0.0052906	0.308952	0.52381	7	6	0.957797	4290	0.285714
k__Fungi.p__Ascomycota.c__Leotiomycetes.o__Thelebolales.f__Pseudeurotiaceae.g__Pseudogymnoascus	3.27208	0.000612474	0.305616	0.380952	7	6	0.95713	514	0.290727
k__Fungi.p__Basidiomycota.c__Microbotryomycetes.o__Sporidiobolales.f__Sporidiobolaceae.g__Rhodosporidiobolus	3.5159	0.00243454	0.284422	0.47619	7	6	0.95253	1376	0.295567
k__Fungi.p__Basidiomycota.c__Agaricomycetes.o__Cantharellales.f__Ceratobasidiaceae.g__Ceratobasidium	2.9576	1.47684e-05	0.338112	0.866667	6	6	0.963064	24	0.474359
d__Bacteria.p__Bdellovibrionota.c__Oligoflexia.o__0319.6G20.f__0319.6G20.g__0319.6G20	3.03887	0.000548573	0.32907	0.6	6	5	0.961531	580	0.310945
d__Bacteria.p__Verrucomicrobiota.c__Verrucomicrobiae.o__Opitutales.f__Opitutaceae.g__Opitutus	3.06007	0.00148492	0.32679	0.266667	6	5	0.961131	1232	0.267677
d__Bacteria.p__Verrucomicrobiota.c__Verrucomicrobiae.o__Pedosphaerales.f__Pedosphaeraceae.g__uncultured	3.0742	0.00103215	0.325287	0.2	6	5	0.960864	604	0.228395
k__Fungi.p__Ascomycota.c__Sordariomycetes.o__Sordariales.__.__	3.08481	0.0183537	0.32417	0.133333	6	5	0.960664	11290	0.224537
d__Bacteria.p__Proteobacteria.c__Alphaproteobacteria.o__Acetobacterales.f__Acetobacteraceae.g__Acidocella	3.12014	0.00328228	0.320498	0.333333	6	6	0.959997	2226	0.295322
d__Bacteria.p__Bacteroidota.c__Bacteroidia.o__Chitinophagales.f__Chitinophagaceae.g__Sediminibacterium	3.14841	0.00445446	0.317621	0.266667	6	6	0.959464	2170	0.241135
k__Fungi.p__Basidiomycota.c__Agaricomycetes.o__Agaricales.f__Psathyrellaceae.__	3.19788	0.00799666	0.312707	0.2	6	5	0.958531	7354	0.274359
d__Bacteria.p__Bacteroidota.c__Bacteroidia.o__Cytophagales.f__Hymenobacteraceae.g__Hymenobacter	3.24382	0.00038631	0.308279	0.466667	6	6	0.957664	322	0.389831
k__Fungi.p__Ascomycota.c__Sordariomycetes.o__Hypocreales.f__Nectriaceae.g__Fusarium	3.26148	0.000264747	0.306609	0.8	6	6	0.95733	288	0.309524
d__Bacteria.p__Myxococcota.c__Myxococcia.o__Myxococcales.f__Myxococcaceae.__	3.26502	0.000132022	0.306277	0.733333	6	6	0.957264	140	0.365248
k__Fungi.p__Ascomycota.c__Dothideomycetes.o__Tubeufiales.f__Tubeufiaceae.g__Neohelicosporium	3.28975	0.00437253	0.303974	0.333333	6	5	0.956797	4460	0.327485
k__Fungi.p__Ascomycota.c__Saccharomycetes.o__Saccharomycetales.f__unidentified.g__unidentified	3.32862	0.014343	0.300425	0.2	6	6	0.956064	8006	0.218391
d__Bacteria.p__Proteobacteria.c__Alphaproteobacteria.o__Acetobacterales.f__Acetobacteraceae.__	3.34276	0.00210232	0.299154	0.4	6	6	0.955797	1124	0.316667
k__Fungi.p__Ascomycota.c__Sordariomycetes.o__Sordariales.f__Chaetomiaceae.__	3.58657	0.000312423	0.278818	0.466667	6	6	0.951197	174	0.366667
d__Bacteria.p__Actinobacteriota.c__Actinobacteria.o__Micrococcales.f__Microbacteriaceae.g__Galbitalea	3.71731	0.007043	0.269011	0.2	6	6	0.94873	3132	0.219298
k__Fungi.p__Basidiomycota.c__Cystobasidiomycetes.o__Cystobasidiales.f__Cystobasidiaceae.g__Cystobasidium	3.75972	0.000144031	0.265977	0.8	6	6	0.94793	120	0.409722
d__Bacteria.p__Proteobacteria.c__Gammaproteobacteria.o__Enterobacterales.f__Erwiniaceae.g__Erwinia	3.89399	0.00955594	0.256806	0.2	6	6	0.945396	6488	0.22807
k__Fungi.p__Ascomycota.c__Sordariomycetes.o__Hypocreales.f__Nectriaceae.__	2.98587	0.010518	0.334911	0.2	5	6	0.962531	6724	0.319481
d__Bacteria.p__Proteobacteria.c__Alphaproteobacteria.o__Rhizobiales.f__Rhizobiaceae.g__Mesorhizobium	3.09894	0.00311019	0.322691	0.2	5	6	0.960397	4172	0.310769
d__Bacteria.p__Actinobacteriota.c__Actinobacteria.o__Micrococcales.f__Microbacteriaceae.g__Curtobacterium	3.11307	0.00424973	0.321226	0.3	5	6	0.960131	2308	0.27037
d__Bacteria.p__Proteobacteria.c__Alphaproteobacteria.o__Rhizobiales.f__Rhizobiaceae.g__Allorhizobium.Neorhizobium.Pararhizobium.Rhizobium	3.13428	0.000421263	0.319053	0.5	5	5	0.959731	326	0.304615
d__Bacteria.p__Myxococcota.c__Polyangia.o__Polyangiales.f__Polyangiaceae.g__Pajaroellobacter	3.18728	0.00729916	0.313747	0.4	5	6	0.958731	3930	0.328
d__Bacteria.p__Myxococcota.c__Myxococcia.o__Myxococcales.__.__	3.18728	0.000225423	0.313747	0.4	5	5	0.958731	236	0.296
k__Fungi.p__Ascomycota.c__Sordariomycetes.o__Sordariales.f__Chaetomiaceae.g__Arcopilus	3.19788	0.00790931	0.312707	0.2	5	6	0.958531	7316	0.338462
d__Bacteria.p__Proteobacteria.c__Alphaproteobacteria.o__Caulobacterales.f__Caulobacteraceae.g__Caulobacter	3.20141	0.00330893	0.312362	0.1	5	6	0.958464	2424	0.315556
k__Fungi.p__Basidiomycota.c__Agaricomycetes.o__Atheliales.f__Atheliaceae.g__Athelia	3.20495	0.000779574	0.312018	0.3	5	6	0.958397	492	0.298039
d__Bacteria.p__Proteobacteria.c__Alphaproteobacteria.o__Sphingomonadales.f__Sphingomonadaceae.g__Sphingobium	3.21908	0.00336691	0.310648	0.1	5	5	0.958131	2078	0.228571
k__Fungi.p__Ascomycota.c__Eurotiomycetes.o__Eurotiales.f__Aspergillaceae.g__Paecilomyces	3.22615	0.0030169	0.309967	0.2	5	5	0.957997	1958	0.242553
k__Fungi.p__Basidiomycota.c__Microbotryomycetes.o__Microbotryomycetes_ord_Incertae_sedis.f__Chrysozymaceae.g__Slooffia	3.36396	0.00172794	0.297269	0.4	5	6	0.955397	1374	0.312821
k__Fungi.p__Ascomycota.c__Leotiomycetes.o__Helotiales.f__Sclerotiniaceae.g__Botrytis	3.43463	0.00537246	0.291152	0.1	5	5	0.954064	3614	0.230769
k__Fungi.p__Ascomycota.c__Sordariomycetes.o__Sordariales.f__Helminthosphaeriaceae.g__Spadicoides	3.53004	0.00413503	0.283283	0.3	5	6	0.952263	2702	0.264286
k__Fungi.p__Ascomycota.c__Leotiomycetes.o__Helotiales.f__Helotiaceae.g__Scytalidium	3.66784	0.0103833	0.27264	0.1	5	6	0.949663	5650	0.225
k__Fungi.p__Ascomycota.c__Sordariomycetes.o__Sordariales.f__Cephalothecaceae.g__Phialemonium	3.0318	0.000535983	0.329837	0.333333	4	6	0.961664	546	0.347973
k__Fungi.p__Ascomycota.c__Eurotiomycetes.o__Eurotiales.f__Aspergillaceae.g__Talaromyces	3.07774	0.00254439	0.324914	0.333333	4	5	0.960797	2060	0.316667
k__Fungi.p__Basidiomycota.c__Agaricomycetes.o__Sebacinales.f__Serendipitaceae.__	3.09541	0.00017367	0.323059	0.5	4	5	0.960464	80	0.433036
k__Fungi.p__Ascomycota.c__Sordariomycetes.o__Diaporthales.f__Diaporthaceae.g__Diaporthe	3.12367	0.000768227	0.320136	0.333333	4	6	0.959931	498	0.347222
k__Fungi.p__Ascomycota.c__Leotiomycetes.o__Helotiales.__.__	3.18375	0.00553736	0.314095	0.166667	4	5	0.958797	2578	0.303571
d__Bacteria.p__Acidobacteriota.c__Acidobacteriae.o__Acidobacteriales.f__Acidobacteriaceae_.Subgroup_1..g__Terriglobus	3.20848	0.000775142	0.311674	0.5	4	6	0.958331	470	0.354167
d__Bacteria.p__Proteobacteria.c__Gammaproteobacteria.o__Enterobacterales.__.__	3.25795	0.00678104	0.306941	0.166667	4	5	0.957397	5476	0.298611
k__Fungi.p__Basidiomycota.c__Agaricomycetes.o__Auriculariales.f__Auriculariaceae.__	3.32862	0.00127998	0.300425	0.166667	4	6	0.956064	594	0.291667
d__Bacteria.p__Proteobacteria.c__Alphaproteobacteria.o__Rhizobiales.f__Kaistiaceae.g__Kaistia	3.34982	0.000189185	0.298523	0.5	4	6	0.955664	120	0.348837
d__Bacteria.p__Verrucomicrobiota.c__Verrucomicrobiae.o__Chthoniobacterales.f__Terrimicrobiaceae.g__Terrimicrobium	3.40636	0.000428348	0.293568	0.5	4	6	0.954597	244	0.405556
d__Bacteria.p__Proteobacteria.c__Alphaproteobacteria.o__Sphingomonadales.f__Sphingomonadaceae.g__Sphingomonas	3.40636	0.000463668	0.293568	0.5	4	6	0.954597	138	0.30303
k__Fungi.p__Basidiomycota.c__Agaricomycetes.o__Sebacinales.f__unidentified.g__unidentified	3.45936	0.00191493	0.28907	0.5	4	5	0.953597	2706	0.460526
d__Bacteria.p__Actinobacteriota.c__Actinobacteria.o__Micrococcales.f__Microbacteriaceae.__	3.49117	0.00697824	0.286437	0.333333	4	6	0.952997	4660	0.276316
d__Bacteria.p__Verrucomicrobiota.c__Verrucomicrobiae.o__Chthoniobacterales.f__Chthoniobacteraceae.g__Chthoniobacter	3.55477	0.00206703	0.281312	0.166667	4	6	0.951797	1020	0.295455
k__Fungi.p__Ascomycota.c__Dothideomycetes.__.__.__	3.90459	0.00181502	0.256109	0.333333	4	6	0.945196	994	0.346154
d__Bacteria.p__Proteobacteria.c__Gammaproteobacteria.o__Pseudomonadales.f__Pseudomonadaceae.g__Pseudomonas	4.20495	0.00384567	0.237815	0.333333	4	7	0.939529	2282	0.328125
d__Bacteria.p__Bacteroidota.c__Bacteroidia.o__Sphingobacteriales.f__env.OPS_17.g__env.OPS_17	3.15548	0.000837479	0.316909	0	3	6	0.959331	768	0.402778
k__Fungi.p__Ascomycota.c__Dothideomycetes.o__Pleosporales.f__Phaeosphaeriaceae.g__Neosetophoma	3.17314	0	0.315145	1	3	5	0.958997	0	0.44086
k__Fungi.p__Ascomycota.c__Sordariomycetes.o__Hypocreales.f__Hypocreaceae.g__Kiflimonium	3.17668	0.00158746	0.314794	0.333333	3	6	0.958931	1210	0.362963
d__Bacteria.p__Bdellovibrionota.c__Bdellovibrionia.o__Bacteriovoracales.f__Bacteriovoracaceae.g__Peredibacter	3.31802	0.00618832	0.301384	0	3	6	0.956264	3810	0.407407
d__Bacteria.p__Acidobacteriota.c__Acidobacteriae.o__Acidobacteriales.f__Acidobacteriaceae_.Subgroup_1..g__Edaphobacter	3.38869	0.000293455	0.295099	0	3	5	0.95493	294	0.377778
k__Fungi.p__Ascomycota.c__Leotiomycetes.o__Helotiales.f__Hyaloscyphaceae.g__unidentified	3.43816	0	0.290853	1	3	6	0.953997	0	0.395833
d__Bacteria.p__Actinobacteriota.c__Actinobacteria.o__Corynebacteriales.f__Mycobacteriaceae.g__Mycobacterium	3.47703	0	0.287602	1	3	6	0.953264	0	0.45045
d__Bacteria.p__Proteobacteria.c__Gammaproteobacteria.o__Xanthomonadales.f__Rhodanobacteraceae.__	3.47703	0	0.287602	1	3	6	0.953264	0	0.45045
k__Fungi.p__Basidiomycota.c__Microbotryomycetes.o__Sporidiobolales.f__Sporidiobolaceae.g__Rhodotorula	3.57244	0.000262896	0.279921	0.666667	3	6	0.951463	160	0.412698
k__Fungi.p__Ascomycota.c__Sordariomycetes.o__Glomerellales.f__Plectosphaerellaceae.g__Gibellulopsis	3.61484	0.0075219	0.276637	0	3	6	0.950663	3420	0.333333
d__Bacteria.p__Actinobacteriota.c__Actinobacteria.o__Propionibacteriales.f__Nocardioidaceae.g__Nocardioides	3.63604	0.00413858	0.275024	0	3	6	0.950263	2480	0.333333
d__Bacteria.p__Proteobacteria.c__Gammaproteobacteria.o__Burkholderiales.f__Oxalobacteraceae.__	3.76678	0.000450822	0.265478	0.333333	3	6	0.947797	142	0.388889
k__Fungi.p__Ascomycota.c__Dothideomycetes.o__Pleosporales.f__Pleosporaceae.g__Alternaria	3.77032	0.00706714	0.26523	0.333333	3	6	0.94773	5110	0.462963
d__Bacteria.p__Bacteroidota.c__Bacteroidia.o__Sphingobacteriales.f__Sphingobacteriaceae.g__Pedobacter	3.78799	0.00465639	0.263993	0.333333	3	6	0.947396	4688	0.377778
d__Bacteria.p__Proteobacteria.c__Alphaproteobacteria.o__Rhizobiales.f__Devosiaceae.g__Devosia	3.78799	0.000725334	0.263993	0.333333	3	7	0.947396	212	0.372549
k__Fungi.p__Basidiomycota.c__Tremellomycetes.o__Tremellales.f__Rhynchogastremataceae.g__Papiliotrema	3.79505	0.00190987	0.263501	0.333333	3	6	0.947263	974	0.435897
k__Fungi.p__Ascomycota.c__Dothideomycetes.o__Pleosporales.f__Coniothyriaceae.g__Coniothyrium	3.82332	0.000998384	0.261553	0	3	6	0.94673	410	0.352941
k__Fungi.p__Ascomycota.c__Sordariomycetes.o__Glomerellales.f__Plectosphaerellaceae.g__Plectosphaerella	3.9576	0.00139261	0.252679	0	3	7	0.944196	506	0.333333
d__Bacteria.p__Proteobacteria.c__Gammaproteobacteria.o__Pseudomonadales.f__Moraxellaceae.g__uncultured	4.01413	0.000929873	0.24912	0.333333	3	7	0.94313	308	0.470588
k__Fungi.p__Ascomycota.c__Dothideomycetes.o__Pleosporales.f__Phaeosphaeriaceae.g__Paraphoma	4.03534	0.000587263	0.247811	0.333333	3	7	0.94273	264	0.384615
d__Bacteria.p__Bacteroidota.c__Bacteroidia.o__Flavobacteriales.f__Flavobacteriaceae.g__Flavobacterium	4.05654	0.00190264	0.246516	0.333333	3	7	0.942329	1272	0.416667
d__Bacteria.p__Actinobacteriota.c__Actinobacteria.o__Propionibacteriales.f__Nocardioidaceae.g__Aeromicrobium	4.08481	0.0012461	0.24481	0.333333	3	7	0.941796	680	0.407407
d__Bacteria.p__Bacteroidota.c__Bacteroidia.o__Cytophagales.f__Spirosomaceae.g__Dyadobacter	4.35336	0.000483926	0.229708	0.333333	3	7	0.936729	122	0.407407
d__Bacteria.p__Bacteroidota.c__Bacteroidia.o__Flavobacteriales.f__Weeksellaceae.g__Chryseobacterium	4.42049	0.00095814	0.226219	0.333333	3	7	0.935462	486	0.428571
k__Fungi.p__Basidiomycota.c__Agaricomycetes.o__Cantharellales.f__Ceratobasidiaceae.g__Thanatephorus	3.24735	0	0.307943	1	2	6	0.957597	0	0.639535
k__Fungi.p__Ascomycota.c__Leotiomycetes.o__Helotiales.f__Mollisiaceae.g__Phialocephala	3.29682	0	0.303323	1	2	6	0.956664	0	0.579545
k__Fungi.p__Ascomycota.c__Sordariomycetes.o__Hypocreales.f__Niessliaceae.g__Eucasphaeria	3.32862	0.000985643	0.300425	0	2	6	0.956064	1146	0.513158
d__Bacteria.p__Proteobacteria.c__Gammaproteobacteria.o__Enterobacterales.f__Erwiniaceae.g__Pantoea	3.35336	0.000828585	0.298209	0	2	6	0.955597	444	0.5
k__Fungi.p__Basidiomycota.c__Agaricomycetes.__.__.__	3.4417	0.00239605	0.290554	0	2	6	0.95393	1180	0.5
k__Fungi.p__Ascomycota.c__Leotiomycetes.o__Helotiales.f__Discinellaceae.__	3.4523	0	0.289662	1	2	6	0.95373	0	0.657895
d__Bacteria.p__Bacteroidota.c__Bacteroidia.o__Chitinophagales.f__Chitinophagaceae.g__Taibaiella	3.5053	0.00152032	0.285282	0	2	6	0.95273	632	0.5
d__Bacteria.p__Proteobacteria.c__Alphaproteobacteria.o__Rhizobiales.f__Rhizobiaceae.__	3.53004	0.000144412	0.283283	0	2	6	0.952263	98	0.54
k__Fungi.p__Basidiomycota.c__Agaricomycetes.o__Trechisporales.f__Trechisporales_fam_Incertae_sedis.g__Sertulicium	3.54417	7.92928e-05	0.282154	0	2	6	0.951997	94	0.519231
k__Fungi.p__Ascomycota.c__Sordariomycetes.o__Hypocreales.f__Hypocreaceae.g__Trichoderma	3.55124	5.8784e-05	0.281592	0	2	6	0.951863	72	0.52
d__Bacteria.p__Actinobacteriota.c__Actinobacteria.o__Catenulisporales.f__Actinospicaceae.g__Actinospica	3.61837	0.000442516	0.276367	0	2	6	0.950597	178	0.5
k__Fungi.p__Glomeromycota.c__Glomeromycetes.o__Glomerales.f__Glomeraceae.g__Rhizophagus	3.71378	0.000775267	0.269267	0	2	6	0.948797	380	0.5
k__Fungi.p__Ascomycota.c__Eurotiomycetes.o__Chaetothyriales.f__Herpotrichiellaceae.g__Melanchlenus	3.73498	0.00353591	0.267739	0	2	6	0.948397	1920	0.5
k__Fungi.p__Basidiomycota.c__Microbotryomycetes.o__Sporidiobolales.f__Sporidiobolaceae.g__Sporidiobolus	3.75618	0	0.266228	1	2	6	0.947997	0	0.608696
k__Fungi.p__Basidiomycota.c__Agaricomycetes.o__Auriculariales.f__Auriculariaceae.g__unidentified	3.79505	0	0.263501	1	2	7	0.947263	0	0.653846
d__Bacteria.p__Proteobacteria.c__Alphaproteobacteria.o__Rhizobiales.f__Beijerinckiaceae.g__Methylobacterium.Methylorubrum	3.83746	6.26519e-06	0.260589	0	2	7	0.946463	2	0.607143
d__Bacteria.p__Proteobacteria.c__Alphaproteobacteria.o__Acetobacterales.f__Acetobacteraceae.g__Acidisoma	3.85512	0.000398898	0.259395	0	2	6	0.94613	70	0.5
d__Bacteria.p__Proteobacteria.c__Gammaproteobacteria.o__Burkholderiales.f__Comamonadaceae.__	3.85866	0.000953059	0.259158	0	2	6	0.946063	498	0.5
d__Bacteria.p__Proteobacteria.c__Gammaproteobacteria.o__Burkholderiales.f__Oxalobacteraceae.g__Massilia	3.87633	0.00130282	0.257976	0	2	7	0.94573	960	0.5
d__Bacteria.p__Proteobacteria.c__Alphaproteobacteria.o__Acetobacterales.f__Acetobacteraceae.g__Endobacter	3.87986	4.7514e-05	0.257741	0	2	7	0.945663	28	0.5625
d__Bacteria.p__Proteobacteria.c__Gammaproteobacteria.o__Xanthomonadales.f__Rhodanobacteraceae.g__Dyella	3.90813	0.00151001	0.255877	0	2	6	0.94513	492	0.5
d__Bacteria.p__Proteobacteria.c__Alphaproteobacteria.o__Caulobacterales.f__Caulobacteraceae.g__Brevundimonas	4.04594	0.000128606	0.247162	0	2	6	0.94253	26	0.5
d__Bacteria.p__Proteobacteria.c__Alphaproteobacteria.o__Elsterales.f__Elsteraceae.g__uncultured	4.0742	0.00706714	0.245447	0	2	6	0.941996	4088	0.5
k__Fungi.p__Basidiomycota.c__Tremellomycetes.o__Cystofilobasidiales.f__Mrakiaceae.g__Tausonia	4.08834	6.00071e-05	0.244598	0	2	7	0.941729	60	0.642857
d__Bacteria.p__Bacteroidota.c__Bacteroidia.o__Chitinophagales.f__Chitinophagaceae.g__Aurantisolimonas	4.28622	0	0.233306	1	2	7	0.937996	0	0.625
k__Fungi.p__Basidiomycota.c__Microbotryomycetes.o__Microbotryomycetes_ord_Incertae_sedis.f__Colacogloeaceae.g__Colacogloea	4.33922	0.000394264	0.230456	0	2	7	0.936996	96	0.5
k__Fungi.p__Ascomycota.c__Leotiomycetes.o__Helotiales.f__Hyaloscyphaceae.g__Glutinomyces	4.39929	0.000967575	0.227309	0	2	7	0.935862	210	0.5
d__Bacteria.p__Proteobacteria.c__Gammaproteobacteria.o__Enterobacterales.f__Yersiniaceae.g__Rahnella1	4.87279	0	0.205221	1	2	7	0.926928	0	0.714286
k__Fungi.p__Basidiomycota.c__Agaricomycetes.o__Agaricales.f__Psathyrellaceae.g__Candolleomyces	3.64311	0	0.274491	0	1	6	0.95013	0	0
k__Fungi.p__Basidiomycota.c__Agaricomycetes.o__Cantharellales.__.__	3.64311	0	0.274491	0	1	6	0.95013	0	0
k__Fungi.p__Ascomycota.c__Dothideomycetes.o__Pleosporales.f__Neopyrenochaetaceae.g__Neopyrenochaeta	3.69258	0	0.270813	0	1	7	0.949197	0	0
d__Bacteria.p__Proteobacteria.c__Gammaproteobacteria.o__Burkholderiales.f__Burkholderiaceae.g__Cupriavidus	3.78092	0	0.264486	0	1	6	0.94753	0	0
k__Fungi.p__Basidiomycota.c__Tremellomycetes.o__Filobasidiales.f__Filobasidiaceae.g__Naganishia	4.18375	0	0.23902	0	1	7	0.939929	0	0
k__Fungi.p__Ascomycota.c__Leotiomycetes.o__Helotiales.f__Helotiales_fam_Incertae_sedis.__	4.19435	0	0.238416	0	1	6	0.939729	0	0
k__Fungi.p__Ascomycota.c__Dothideomycetes.o__Pleosporales.f__Leptosphaeriaceae.g__Plenodomus	4.32509	0	0.231209	0	1	7	0.937262	0	0
k__Fungi.p__Basidiomycota.c__Agaricomycetes.o__Cantharellales.f__Ceratobasidiaceae.__	4.32509	0	0.231209	0	1	7	0.937262	0	0
k__Fungi.p__Ascomycota.c__Sordariomycetes.o__Hypocreales.f__Hypocreales_fam_Incertae_sedis.g__Sarocladium	4.61131	0	0.216858	0	1	7	0.931862	0	0
d__Bacteria.p__Verrucomicrobiota.c__Verrucomicrobiae.o__Verrucomicrobiales.f__Rubritaleaceae.g__Luteolibacter	4.76678	0	0.209785	0	1	7	0.928929	0	0
k__Fungi.p__Basidiomycota.c__Agaricomycetes.o__Sebacinales.f__Serendipitaceae.g__unidentified	5.07067	0	0.197213	0	1	7	0.923195	0	0

## Sheet: Table_S6
Table S6. Metabolic pathways differentially represented between rootstock and tree microbioms. The values represent % of the reads in the group. Benjamini-Hochberg corrected P value of Welch’s test, we.eBH < 0.05. Genera level annotation.
Pathway	description	tree_rel_abnd_%	rootstock_rel_abnd_%	we.ep	we.eBH	wi.ep	wi.eBH
PWY0-1338	polymyxin resistance	0.00133816	0.122881	0	0	0	0
AST-PWY	L-arginine degradation II (AST pathway)	0.00808806	0.181158	0	0	0	0
PYRIDOXSYN-PWY	pyridoxal 5'-phosphate biosynthesis I	0.0210847	0.337641	0	0	5.20417e-18	6.43363e-17
PWY-7377	cob(II)yrinate a,c-diamide biosynthesis I (early cobalt insertion)	0.0042437	0.06237	0	0	0	0
PWY0-845	superpathway of pyridoxal 5'-phosphate biosynthesis and salvage	0.0366614	0.298307	0	0	0	0
PWY-7456	mannan degradation	0.00622438	0.0471038	0	0	0	0
GLUCOSE1PMETAB-PWY	glucose and glucose-1-phosphate degradation	0.031203	0.232157	0	0	4.95782e-13	4.01482e-12
CATECHOL-ORTHO-CLEAVAGE-PWY	catechol degradation to &beta;-ketoadipate	0.0301947	0.220911	0	0	0	0
PWY-5384	sucrose degradation IV (sucrose phosphorylase)	0.030255	0.21689	0	0	4.07289e-13	3.34425e-12
PWY-7295	L-arabinose degradation IV	0.00593047	0.0383325	0	0	0	0
PWY-6185	4-methylcatechol degradation (ortho cleavage)	0.032246	0.203044	0	0	0	0
PWY-5417	catechol degradation III (ortho-cleavage pathway)	0.0343681	0.214144	0	0	0	0
PWY-5431	aromatic compounds degradation via &beta;-ketoadipate	0.0343681	0.214144	0	0	0	0
SUCSYN-PWY	sucrose biosynthesis I (from photosynthesis)	0.0060359	0.0361397	0	0	3.29597e-17	4.07075e-16
PWY-7347	sucrose biosynthesis III	0.00202661	0.0115906	0	0	1.59595e-16	1.96414e-15
PWY-621	sucrose degradation III (sucrose invertase)	0.0509627	0.27334	0	0	0	0
PWY-6182	superpathway of salicylate degradation	0.0386968	0.200006	0	0	0	0
KETOGLUCONMET-PWY	ketogluconate metabolism	0.0247454	0.126473	0	0	0	0
PWY-7098	vanillin and vanillate degradation II	0.0284444	0.10418	0	0	0	0
PWY-6338	superpathway of vanillin and vanillate degradation	0.0258823	0.0945521	0	0	0	0
PWY-7097	vanillin and vanillate degradation I	0.0258823	0.0945521	0	0	0	0
P184-PWY	protocatechuate degradation I (meta-cleavage pathway)	0.0314677	0.104681	0	0	0	0
GALACTARDEG-PWY	D-galactarate degradation I	0.0134794	0.040849	0	0	0	0
GLUCARGALACTSUPER-PWY	superpathway of D-glucarate and D-galactarate degradation	0.0134794	0.040849	0	0	0	0
GLUCARDEG-PWY	D-glucarate degradation I	0.0151147	0.0417366	0	0	1.11022e-16	1.36968e-15
PWY-6339	syringate degradation	0.0561089	0.146741	0	0	0	0
PWY0-1533	methylphosphonate degradation I	0.167182	0.392107	0	0	1.37199e-14	1.36447e-13
GALLATE-DEGRADATION-I-PWY	gallate degradation II	0.0503098	0.10986	0	0	1.52309e-15	1.66562e-14
GALLATE-DEGRADATION-II-PWY	gallate degradation I	0.0503098	0.10986	0	0	1.42247e-15	1.5642e-14
PWY1G-0	mycothiol biosynthesis	0.176614	0.0223772	1.78606e-43	7.35847e-41	1.45568e-18	5.95463e-17
PWY0-1415	superpathway of heme biosynthesis from uroporphyrinogen-III	0.296185	0.0786699	1.61589e-40	2.48732e-38	2.00457e-18	6.06124e-17
P163-PWY	L-lysine fermentation to acetate and butanoate	0.0700136	0.00312215	1.51662e-39	1.75913e-37	1.08486e-18	5.95463e-17
PWY-5840	superpathway of menaquinol-7 biosynthesis	0.204504	0.0594149	1.54317e-38	1.59342e-36	1.63297e-18	5.95463e-17
PWY-5898	superpathway of menaquinol-12 biosynthesis	0.200195	0.0621194	3.71457e-36	1.88045e-34	1.74572e-18	5.95463e-17
PWY-5899	superpathway of menaquinol-13 biosynthesis	0.200195	0.0621194	4.04226e-36	1.96045e-34	1.75893e-18	5.95463e-17
PWY-5897	superpathway of menaquinol-11 biosynthesis	0.200195	0.0621194	4.15212e-36	2.05973e-34	1.74989e-18	5.95568e-17
PWY-5863	superpathway of phylloquinol biosynthesis	0.132389	0.0371421	6.15354e-36	2.74799e-34	1.79238e-18	5.95463e-17
PWY-5838	superpathway of menaquinol-8 biosynthesis I	0.209337	0.0669644	6.48827e-36	2.83561e-34	1.77289e-18	5.95463e-17
PWY-5861	superpathway of demethylmenaquinol-8 biosynthesis	0.161814	0.0470098	1.60712e-35	5.861e-34	1.8044e-18	5.95518e-17
PWY-5837	1,4-dihydroxy-2-naphthoate biosynthesis I	0.120038	0.033028	1.771e-35	6.76881e-34	1.82637e-18	5.9565e-17
PWY-6317	galactose degradation I (Leloir pathway)	0.329485	0.116439	1.45637e-33	4.32655e-32	1.68456e-18	5.95463e-17
PWY-7255	ergothioneine biosynthesis I (bacteria)	0.175347	0.0303235	1.48946e-33	4.49089e-32	4.82964e-18	1.16465e-16
RHAMCAT-PWY	L-rhamnose degradation I	0.160502	0.0280263	3.80906e-33	1.08003e-31	1.15516e-18	5.95463e-17
ALL-CHORISMATE-PWY	superpathway of chorismate metabolism	0.170999	0.0689797	1.93771e-32	5.32617e-31	2.04784e-18	6.24021e-17
PWY-6383	mono-trans, poly-cis decaprenyl phosphate biosynthesis	0.194564	0.0327043	2.41541e-30	6.02457e-29	7.8189e-18	1.67005e-16
HOMOSER-METSYN-PWY	L-methionine biosynthesis I	0.306071	0.145718	1.82568e-29	4.16245e-28	1.91244e-17	3.21492e-16
PWY-5971	palmitate biosynthesis II (bacteria and plants)	0.426802	0.0964213	8.4508e-29	1.78424e-27	1.02846e-16	1.05758e-15
MET-SAM-PWY	superpathway of S-adenosyl-L-methionine biosynthesis	0.405821	0.240113	6.75453e-28	1.37726e-26	1.85161e-17	3.15142e-16
PWY-5347	superpathway of L-methionine biosynthesis (transsulfuration)	0.414343	0.250472	1.61891e-27	3.04332e-26	5.7963e-17	6.90655e-16
PWY-6545	pyrimidine deoxyribonucleotides de novo biosynthesis III	0.292279	0.0786386	1.92195e-27	3.76743e-26	7.30745e-17	8.27819e-16
PWY-6263	superpathway of menaquinol-8 biosynthesis II	0.224438	0.0668182	2.71281e-26	4.79806e-25	8.37848e-18	1.7406e-16
PWY-7007	methyl ketone biosynthesis	0.166562	0.034824	3.99743e-26	6.80801e-25	6.95478e-17	7.93142e-16
PWY-6478	GDP-D-glycero-&alpha;-D-manno-heptose biosynthesis	0.133139	0.0463728	8.71564e-25	1.39635e-23	3.01256e-18	8.05145e-17
PWY-1882	superpathway of C1 compounds oxidation to CO2	0.0163514	0.00452138	4.22513e-24	5.66751e-23	4.61226e-15	1.88061e-14
PWY-1622	formaldehyde assimilation I (serine pathway)	0.0356943	0.00457359	8.31224e-24	1.10366e-22	9.27534e-16	5.03895e-15
PWY4FS-7	phosphatidylglycerol biosynthesis I (plastidic)	0.616828	0.494397	3.27919e-23	4.20536e-22	4.18216e-17	5.39395e-16
PWY4FS-8	phosphatidylglycerol biosynthesis II (non-plastidic)	0.616828	0.494397	3.80394e-23	4.73518e-22	4.2482e-17	5.46272e-16
P108-PWY	pyruvate fermentation to propanoate I	0.586956	0.413899	3.86322e-23	4.73886e-22	2.6051e-16	2.05354e-15
ANAEROFRUCAT-PWY	homolactic fermentation	0.508018	0.379911	4.19082e-23	5.21057e-22	1.9897e-17	3.25263e-16
P4-PWY	superpathway of L-lysine, L-threonine and L-methionine biosynthesis I	0.473942	0.363632	5.86677e-23	6.6791e-22	2.08937e-16	1.77937e-15
REDCITCYC	TCA cycle VIII (helicobacter)	0.681218	0.525253	5.93116e-23	6.98466e-22	2.72808e-17	4.05515e-16
PWY-5896	superpathway of menaquinol-10 biosynthesis	0.150678	0.0462475	2.46814e-22	2.61809e-21	2.97442e-17	4.2317e-16
PWY-5850	superpathway of menaquinol-6 biosynthesis I	0.150678	0.0462475	2.49919e-22	2.66787e-21	2.97193e-17	4.24235e-16
PWY-5845	superpathway of menaquinol-9 biosynthesis	0.150678	0.0462475	2.61537e-22	2.81055e-21	3.05837e-17	4.28321e-16
PWY-5862	superpathway of demethylmenaquinol-9 biosynthesis	0.111773	0.031942	3.9574e-22	4.03759e-21	3.09871e-17	4.34432e-16
PWY-5860	superpathway of demethylmenaquinol-6 biosynthesis I	0.111773	0.031942	4.47916e-22	4.50568e-21	3.22302e-17	4.4448e-16
METH-ACETATE-PWY	methanogenesis from acetate	0.00391105	0.000198398	1.85314e-21	1.11705e-20	3.64031e-18	9.19162e-17
PWY-6969	TCA cycle V (2-oxoglutarate:ferredoxin oxidoreductase)	0.714455	0.553529	1.68365e-21	1.62609e-20	1.01722e-16	1.06553e-15
PWY0-781	aspartate superpathway	0.453072	0.363162	1.78999e-21	1.70419e-20	3.81272e-16	2.62381e-15
UDPNAGSYN-PWY	UDP-N-acetyl-D-glucosamine biosynthesis I	0.492268	0.432068	2.75069e-21	2.49864e-20	3.93414e-16	2.69501e-15
PWY-6397	mycolyl-arabinogalactan-peptidoglycan complex biosynthesis	0.0258783	0.00328922	7.60367e-21	5.82601e-20	6.33492e-16	3.76561e-15
GLYCOLYSIS	glycolysis I (from glucose 6-phosphate)	0.5528	0.405212	7.39006e-21	6.38388e-20	9.30876e-17	9.93697e-16
PWY-7094	fatty acid salvage	0.816701	0.640417	9.26039e-21	7.45556e-20	3.15997e-17	4.41074e-16
P161-PWY	acetylene degradation	0.228026	0.0810611	1.50996e-20	1.12424e-19	1.02558e-17	2.0039e-16
PWY-5741	ethylmalonyl-CoA pathway	0.0785357	0.0320047	2.02438e-20	1.38544e-19	5.93486e-16	3.57343e-15
ANAGLYCOLYSIS-PWY	glycolysis III (from glucose)	0.585501	0.455678	2.04982e-20	1.58981e-19	2.76311e-16	2.12781e-15
GLYCOLYSIS-E-D	superpathway of glycolysis and Entner-Doudoroff	0.504413	0.419736	2.81324e-20	2.07499e-19	5.21816e-16	3.28557e-15
GLYCOLYSIS-TCA-GLYOX-BYPASS	superpathway of glycolysis, pyruvate dehydrogenase, TCA, and glyoxylate bypass	0.480916	0.43966	3.00413e-20	2.15968e-19	2.10118e-16	1.78275e-15
P124-PWY	Bifidobacterium shunt	0.393774	0.239957	3.62056e-20	2.45785e-19	2.64711e-16	2.04967e-15
PWY-7221	guanosine ribonucleotides de novo biosynthesis	0.577259	0.494167	3.66147e-20	2.61994e-19	8.84636e-16	4.90008e-15
PWY-5659	GDP-mannose biosynthesis	0.650579	0.562979	3.69646e-20	2.63906e-19	3.49806e-16	2.48768e-15
ARGORNPROST-PWY	arginine, ornithine and proline interconversion	0.106132	0.0291958	4.24089e-20	2.66737e-19	2.32655e-16	1.85357e-15
PWY-5188	tetrapyrrole biosynthesis I (from glutamate)	0.559349	0.491024	4.28986e-20	3.00433e-19	2.49676e-16	1.9989e-15
PHOSLIPSYN-PWY	superpathway of phospholipid biosynthesis I (bacteria)	0.645325	0.601751	5.30778e-20	3.62003e-19	6.79077e-16	4.00148e-15
OANTIGEN-PWY	O-antigen building blocks biosynthesis (E. coli)	0.507478	0.454445	5.43895e-20	3.71038e-19	1.49148e-15	7.45217e-15
PYRIDNUCSAL-PWY	NAD salvage pathway I	0.402263	0.372392	5.89836e-20	3.97268e-19	9.85244e-16	5.34519e-15
PWY-5121	superpathway of geranylgeranyl diphosphate biosynthesis II (via MEP)	0.493187	0.402528	6.89142e-20	4.59446e-19	1.69248e-16	1.5363e-15
PWY-7219	adenosine ribonucleotides de novo biosynthesis	0.627341	0.551713	9.81209e-20	6.31248e-19	8.14873e-16	4.60089e-15
PWY-7392	taxadiene biosynthesis (engineered)	0.409965	0.280169	1.02833e-19	6.5669e-19	4.89307e-16	3.11531e-15
TCA	TCA cycle I (prokaryotic)	0.728454	0.594483	1.74479e-19	1.08158e-18	5.87805e-16	3.59104e-15
PWY-6609	adenine and adenosine salvage III	0.358511	0.233096	2.17995e-19	1.23879e-18	2.40696e-16	1.93723e-15
PWY-5189	tetrapyrrole biosynthesis II (from glycine)	0.540737	0.460126	2.96938e-19	1.74947e-18	3.59249e-16	2.52635e-15
P164-PWY	purine nucleobases degradation I (anaerobic)	0.185216	0.0592791	3.48331e-19	1.86373e-18	2.46537e-15	1.11882e-14
PWY-5392	reductive TCA cycle II	0.0236021	0.000981546	4.68186e-19	2.26344e-18	1.55361e-16	1.41209e-15
PEPTIDOGLYCANSYN-PWY	peptidoglycan biosynthesis I (meso-diaminopimelate containing)	0.514585	0.459625	4.68894e-19	2.64488e-18	1.1897e-15	6.20671e-15
PWY-6387	UDP-N-acetylmuramoyl-pentapeptide biosynthesis I (meso-diaminopimelate containing)	0.517945	0.463749	4.87419e-19	2.73286e-18	1.20577e-15	6.25299e-15
PYRIDNUCSYN-PWY	NAD biosynthesis I (from aspartate)	0.457374	0.399959	5.40635e-19	2.98213e-18	6.48774e-16	3.87289e-15
PWY-5484	glycolysis II (from fructose 6-phosphate)	0.511384	0.386855	5.45727e-19	3.04255e-18	9.09718e-16	5.01606e-15
PWY-7228	superpathway of guanosine nucleotides de novo biosynthesis I	0.599776	0.528155	5.66257e-19	3.14452e-18	2.74677e-15	1.24077e-14
TRPSYN-PWY	L-tryptophan biosynthesis	0.54577	0.483474	8.24001e-19	4.35662e-18	9.79041e-16	5.30598e-15
PWY-7229	superpathway of adenosine nucleotides de novo biosynthesis I	0.631195	0.568733	8.46443e-19	4.50048e-18	2.61953e-15	1.19094e-14
PWY-6125	superpathway of guanosine nucleotides de novo biosynthesis II	0.579359	0.513975	1.0034e-18	5.26143e-18	3.19451e-15	1.40138e-14
PWY-6897	thiamin salvage II	0.502965	0.450791	1.18673e-18	6.07205e-18	2.63071e-15	1.19318e-14
PWY-7208	superpathway of pyrimidine nucleobases salvage	0.618867	0.552819	1.39611e-18	6.99684e-18	9.21744e-16	5.05249e-15
PWY-7197	pyrimidine deoxyribonucleotide phosphorylation	0.484616	0.436297	1.42044e-18	7.10706e-18	2.01104e-15	9.57854e-15
PWY-6126	superpathway of adenosine nucleotides de novo biosynthesis II	0.604276	0.546492	1.54311e-18	7.64541e-18	3.26052e-15	1.42704e-14
PWY-3781	aerobic respiration I (cytochrome c)	1.78224	1.39935	1.71246e-18	8.36686e-18	3.52656e-16	2.48943e-15
PWY-5918	superpathay of heme biosynthesis from glutamate	0.433114	0.406726	2.12871e-18	1.01962e-17	4.76096e-16	3.07504e-15
PWY-6353	purine nucleotides degradation II (aerobic)	0.467473	0.352312	2.42616e-18	1.11246e-17	1.3154e-15	6.70929e-15
BRANCHED-CHAIN-AA-SYN-PWY	superpathway of branched amino acid biosynthesis	0.823316	0.719567	2.4654e-18	1.17049e-17	1.05319e-14	3.88902e-14
PWY-5676	acetyl-CoA fermentation to butanoate II	0.0955672	0.0546638	2.87688e-18	1.28144e-17	2.06929e-15	9.70076e-15
ARGSYNBSUB-PWY	L-arginine biosynthesis II (acetyl cycle)	0.514679	0.487661	2.96396e-18	1.37185e-17	9.93603e-15	3.68091e-14
PANTO-PWY	phosphopantothenate biosynthesis I	0.510024	0.467091	3.13996e-18	1.4662e-17	4.43256e-15	1.84028e-14
CENTFERM-PWY	pyruvate fermentation to butanoate	0.00291832	0.00010442	4.25149e-18	1.61148e-17	5.3399e-15	2.12635e-14
PWY-7560	methylerythritol phosphate pathway II	0.463333	0.420394	5.33917e-18	2.38382e-17	5.83696e-15	2.33148e-14
COA-PWY	coenzyme A biosynthesis I	0.495588	0.445225	6.59301e-18	2.89966e-17	4.41607e-15	1.83184e-14
NONMEVIPP-PWY	methylerythritol phosphate pathway I	0.463333	0.420394	7.6323e-18	3.2953e-17	6.17224e-15	2.44781e-14
GLYCOCAT-PWY	glycogen degradation I (bacterial)	0.393834	0.359799	7.82799e-18	3.37692e-17	3.01491e-16	2.23806e-15
P23-PWY	reductive TCA cycle I	0.324363	0.133845	9.29034e-18	3.77914e-17	1.46705e-16	1.35206e-15
PWY-6386	UDP-N-acetylmuramoyl-pentapeptide biosynthesis II (lysine-containing)	0.500835	0.457025	1.07117e-17	4.54246e-17	3.70169e-15	1.58357e-14
PWY-6385	peptidoglycan biosynthesis III (mycobacteria)	0.498935	0.457254	1.13837e-17	4.80152e-17	4.55438e-15	1.88382e-14
PWY-6590	superpathway of Clostridium acetobutylicum acidogenic fermentation	0.00372696	0.000135746	1.41628e-17	5.2033e-17	5.68379e-15	2.23746e-14
PWY0-162	superpathway of pyrimidine ribonucleotides de novo biosynthesis	0.580976	0.532948	1.40969e-17	5.8624e-17	1.02042e-14	3.78574e-14
PANTOSYN-PWY	pantothenate and coenzyme A biosynthesis I	0.480238	0.449914	1.44117e-17	5.98696e-17	9.21227e-15	3.46412e-14
PWY-5505	L-glutamate and L-glutamine biosynthesis	0.188695	0.123466	1.68786e-17	6.78218e-17	1.67373e-15	8.14028e-15
FAO-PWY	fatty acid &beta;-oxidation I	0.73232	0.608935	1.98508e-17	7.99904e-17	2.26939e-16	1.87654e-15
PWY-6608	guanosine nucleotides degradation III	0.434341	0.418953	2.0339e-17	8.09338e-17	6.40438e-15	2.50917e-14
METHYLGALLATE-DEGRADATION-PWY	methylgallate degradation	0.0604213	0.125742	6.93889e-18	8.22813e-17	2.3823e-14	2.28598e-13
PWY-7220	adenosine deoxyribonucleotides de novo biosynthesis II	0.590606	0.543161	2.18794e-17	8.81934e-17	1.35602e-14	4.86121e-14
PWY-7222	guanosine deoxyribonucleotides de novo biosynthesis II	0.590606	0.543161	2.30254e-17	9.2219e-17	1.39886e-14	5.00046e-14
HSERMETANA-PWY	L-methionine biosynthesis III	0.494053	0.422869	2.31874e-17	9.25726e-17	1.08695e-14	4.0056e-14
PWY-5686	UMP biosynthesis	0.582085	0.536916	3.14683e-17	1.23345e-16	1.43431e-14	5.09855e-14
PWY-6123	inosine-5'-phosphate biosynthesis I	0.499237	0.457996	3.68643e-17	1.42316e-16	1.17918e-14	4.28827e-14
PWY-841	superpathway of purine nucleotides de novo biosynthesis I	0.578249	0.537324	4.95289e-17	1.88221e-16	3.21004e-14	1.06843e-13
PWY-5695	urate biosynthesis/inosine 5'-phosphate degradation	0.708054	0.653605	6.67029e-17	2.49483e-16	1.59045e-14	5.61057e-14
PWY-2942	L-lysine biosynthesis III	0.653004	0.593167	7.06709e-17	2.6656e-16	1.6024e-14	5.65337e-14
PENTOSE-P-PWY	pentose phosphate pathway	0.613105	0.564243	8.93824e-17	3.32942e-16	2.45175e-15	1.12496e-14
PWY-5097	L-lysine biosynthesis VI	0.609797	0.561758	1.13908e-16	4.16989e-16	2.24237e-14	7.66121e-14
P241-PWY	coenzyme B biosynthesis	0.00294667	8.35359e-05	1.83104e-16	5.30139e-16	9.70497e-16	5.2192e-15
P105-PWY	TCA cycle IV (2-oxoglutarate decarboxylase)	0.619952	0.556631	1.50195e-16	5.36254e-16	1.31365e-13	3.95853e-13
PWY-5103	L-isoleucine biosynthesis III	0.706606	0.651089	1.52384e-16	5.4875e-16	1.08651e-13	3.3253e-13
PWY-6174	mevalonate pathway II (archaea)	0.00629307	0.00015663	2.36358e-16	6.60095e-16	7.04461e-18	1.51342e-16
VALSYN-PWY	L-valine biosynthesis	1.01849	0.876427	2.23973e-16	7.82247e-16	9.85818e-14	3.03605e-13
ILEUSYN-PWY	L-isoleucine biosynthesis I (from threonine)	1.01849	0.876427	2.30442e-16	8.009e-16	9.79856e-14	3.02002e-13
PWY-5101	L-isoleucine biosynthesis II	1.01383	0.89634	2.38034e-16	8.29599e-16	1.5027e-13	4.46351e-13
LACTOSECAT-PWY	lactose and galactose degradation I	1.59733e-06	0.00138878	7.80626e-17	8.73976e-16	0	0
GLUTORN-PWY	L-ornithine biosynthesis	0.521799	0.545541	2.66527e-16	9.26604e-16	3.18709e-14	1.06049e-13
RIBOSYN2-PWY	flavin biosynthesis I (bacteria and plants)	0.514722	0.49637	3.28583e-16	1.12085e-15	3.06503e-14	1.02262e-13
COMPLETE-ARO-PWY	superpathway of aromatic amino acid biosynthesis	0.560028	0.558155	3.31559e-16	1.12852e-15	4.5017e-14	1.4631e-13
DTDPRHAMSYN-PWY	dTDP-L-rhamnose biosynthesis I	0.570896	0.514403	4.98059e-16	1.65266e-15	2.79764e-14	9.3808e-14
ENTBACSYN-PWY	enterobactin biosynthesis	0.143088	0.0476676	6.855e-16	2.21338e-15	1.13612e-13	3.45221e-13
ARO-PWY	chorismate biosynthesis I	0.533838	0.536248	7.23045e-16	2.36955e-15	7.2911e-14	2.29773e-13
THRESYN-PWY	superpathway of L-threonine biosynthesis	0.581652	0.536488	1.03669e-15	3.3195e-15	4.85479e-14	1.57144e-13
TYRFUMCAT-PWY	L-tyrosine degradation I	0.119608	0.392556	3.27863e-16	3.724e-15	1.4792e-14	1.46581e-13
PWY-7371	1,4-dihydroxy-6-naphthoate biosynthesis II	0.125322	0.0441383	1.6106e-15	4.98514e-15	2.82122e-16	2.13209e-15
PWY-6737	starch degradation V	0.378133	0.370367	1.64214e-15	5.14413e-15	4.53183e-15	1.87076e-14
PWY-3001	superpathway of L-isoleucine biosynthesis I	0.650613	0.605301	1.81432e-15	5.66905e-15	1.81883e-13	5.32643e-13
PWY-5181	toluene degradation III (aerobic) (via p-cresol)	0.092234	0.263911	5.70724e-16	6.38271e-15	8.51132e-13	6.6138e-12
PWY-7400	L-arginine biosynthesis IV (archaebacteria)	0.479409	0.484142	2.56173e-15	7.8048e-15	2.51004e-13	7.17341e-13
ARGSYN-PWY	L-arginine biosynthesis I (via L-ornithine)	0.480373	0.486356	2.62665e-15	7.97276e-15	2.7548e-13	7.83334e-13
PWY-6404	superpathway of mycolyl-arabinogalactan-peptidoglycan complex biosynthesis	0.0527545	0.00978414	2.77521e-15	8.20052e-15	3.98827e-13	1.09747e-12
COLANSYN-PWY	colanic acid building blocks biosynthesis	0.400775	0.348741	2.85632e-15	8.63902e-15	1.56042e-12	3.92669e-12
PWY-5656	mannosylglycerate biosynthesis I	0.00130182	0.00015663	3.52929e-15	9.73435e-15	2.13774e-12	5.26365e-12
PWY-5420	catechol degradation II (meta-cleavage pathway)	0.0880858	0.0456628	3.66738e-15	1.06592e-14	2.68314e-15	1.20026e-14
CALVIN-PWY	Calvin-Benson-Bassham cycle	0.58739	0.559492	3.63996e-15	1.08733e-14	1.33369e-12	3.39073e-12
PWY-6163	chorismate biosynthesis from 3-dehydroquinate	0.525906	0.528093	3.72356e-15	1.10892e-14	1.94365e-13	5.67227e-13
PWY-5180	toluene degradation I (aerobic) (via o-cresol)	0.139748	0.115342	4.35967e-15	1.27252e-14	1.62346e-13	4.78193e-13
PWY-5182	toluene degradation II (aerobic) (via 4-methylcatechol)	0.139748	0.115342	4.47974e-15	1.30142e-14	1.60816e-13	4.76023e-13
PWY-7211	superpathway of pyrimidine deoxyribonucleotides de novo biosynthesis	0.522519	0.513338	4.61123e-15	1.35546e-14	6.0183e-13	1.62257e-12
PWY0-166	superpathway of pyrimidine deoxyribonucleotides de novo biosynthesis (E. coli)	0.461838	0.470004	4.7386e-15	1.39076e-14	6.51499e-13	1.7398e-12
GLUCONEO-PWY	gluconeogenesis I	0.53123	0.499419	5.32126e-15	1.55723e-14	6.35275e-13	1.70523e-12
PWY-7234	inosine-5'-phosphate biosynthesis III	0.472043	0.453829	5.92228e-15	1.72076e-14	4.14069e-13	1.14822e-12
POLYISOPRENSYN-PWY	polyisoprenoid biosynthesis (E. coli)	0.511651	0.476363	6.3408e-15	1.83265e-14	1.55866e-13	4.61281e-13
PWY-7323	superpathway of GDP-mannose-derived O-antigen building blocks biosynthesis	0.494076	0.493906	8.77626e-15	2.49853e-14	2.06309e-12	5.10842e-12
PWY-6210	2-aminophenol degradation	0.0380487	0.011977	1.28571e-14	3.55768e-14	2.38789e-16	1.8298e-15
HEMESYN2-PWY	heme biosynthesis II (anaerobic)	0.520594	0.503982	1.27675e-14	3.58203e-14	4.23611e-13	1.17285e-12
PWY0-1297	superpathway of purine deoxyribonucleosides degradation	0.216682	0.159553	1.40577e-14	3.88888e-14	1.1537e-14	4.16164e-14
DAPLYSINESYN-PWY	L-lysine biosynthesis I	0.5456	0.562029	1.61937e-14	4.49544e-14	1.21922e-12	3.12225e-12
P381-PWY	adenosylcobalamin biosynthesis II (late cobalt incorporation)	0.0162408	0.00952309	1.93509e-14	5.17846e-14	6.80953e-15	2.62292e-14
PWY-7274	D-cycloserine biosynthesis	0	0.00178558	6.31439e-15	6.20852e-14	0	0
PWY-5345	superpathway of L-methionine biosynthesis (by sulfhydrylation)	0.524386	0.507459	2.56153e-14	6.99763e-14	8.49646e-13	2.22647e-12
PWY-7539	6-hydroxymethyl-dihydropterin diphosphate biosynthesis III (Chlamydia)	0.51639	0.529241	2.96192e-14	8.03047e-14	6.69048e-13	1.78903e-12
PWY0-1319	CDP-diacylglycerol biosynthesis II	0.65267	0.64521	3.32097e-14	8.98108e-14	2.82492e-12	6.87976e-12
PWY-5667	CDP-diacylglycerol biosynthesis I	0.65267	0.64521	3.37249e-14	9.12617e-14	2.87728e-12	6.99375e-12
PWY-5419	catechol degradation to 2-oxopent-4-enoate II	0.0767995	0.0361188	3.70582e-14	9.93581e-14	1.22017e-14	4.38759e-14
PWY-7374	1,4-dihydroxy-6-naphthoate biosynthesis I	0.118986	0.0424884	4.71856e-14	1.26286e-13	2.17573e-15	1.01268e-14
PWY-7184	pyrimidine deoxyribonucleotides de novo biosynthesis I	0.489947	0.496224	7.9209e-14	2.07468e-13	4.22409e-12	1.01078e-11
PWY-6396	superpathway of 2,3-butanediol biosynthesis	0.0446489	0.122662	2.04056e-14	2.14498e-13	4.68375e-16	5.50604e-15
PWY-181	photorespiration	0.213337	0.157966	9.77575e-14	2.55994e-13	9.58903e-14	2.90305e-13
PWY-6147	6-hydroxymethyl-dihydropterin diphosphate biosynthesis I	0.492452	0.519917	1.05133e-13	2.7405e-13	1.98193e-12	4.91248e-12
P122-PWY	heterolactic fermentation	0.0707532	0.159011	3.35652e-14	3.45507e-13	0	0
PWY-5415	catechol degradation I (meta-cleavage pathway)	0.11544	0.071089	3.09788e-13	7.88729e-13	5.49956e-13	1.47588e-12
PWY-4722	creatinine degradation II	0	0.000219282	9.81958e-14	8.64771e-13	0	0
PWY-5654	2-amino-3-carboxymuconate semialdehyde degradation to 2-oxopentenoate	0.0503134	0.0214269	3.52683e-13	8.97248e-13	3.89222e-16	2.61391e-15
PWY0-1298	superpathway of pyrimidine deoxyribonucleosides degradation	0.130787	0.102331	4.01358e-13	1.014e-12	2.19796e-12	5.41852e-12
PWY-6505	L-tryptophan degradation XII (Geobacillus)	0.0565182	0.0254576	5.452e-13	1.36792e-12	1.69019e-14	5.82928e-14
PWY-6901	superpathway of glucose and xylose degradation	0.133845	0.294391	1.65113e-13	1.61633e-12	0	0
NONOXIPENT-PWY	pentose phosphate pathway (non-oxidative branch)	0.724316	0.709554	7.35817e-13	1.84871e-12	1.17023e-12	2.99129e-12
PWY-5430	meta cleavage pathway of aromatic compounds	0.0475253	0.0293106	8.46451e-13	2.09185e-12	2.50288e-11	5.70124e-11
PWY-5913	TCA cycle VI (obligate autotrophs)	0.523539	0.47675	8.6888e-13	2.16897e-12	8.03606e-13	2.12183e-12
HISTSYN-PWY	L-histidine biosynthesis	0.479075	0.484947	1.03194e-12	2.56235e-12	1.3971e-11	3.23694e-11
PWY-6628	superpathway of L-phenylalanine biosynthesis	0.250005	0.508932	4.52338e-13	4.33339e-12	1.78268e-12	1.30387e-11
TRNA-CHARGING-PWY	tRNA charging	0.439175	0.451208	2.15946e-12	5.27658e-12	4.45456e-12	1.06399e-11
P42-PWY	incomplete reductive TCA cycle	0.391676	0.37399	2.2236e-12	5.43858e-12	4.57093e-14	1.47556e-13
PWY-5910	superpathway of geranylgeranyldiphosphate biosynthesis I (via mevalonate)	0.0163838	0.00509569	2.28221e-12	5.55586e-12	3.2289e-13	8.98567e-13
PWY-922	mevalonate pathway I	0.0115938	0.0035816	2.87821e-12	6.96292e-12	3.71929e-13	1.02106e-12
PWY-7373	superpathway of demethylmenaquinol-6 biosynthesis II	3.35439e-05	0.00138878	8.85767e-13	7.16747e-12	0	0
PWY0-1241	ADP-L-glycero-&beta;-D-manno-heptose biosynthesis	0.185628	0.215105	5.55986e-12	1.32747e-11	2.63726e-11	6.0033e-11
PWY-6572	chondroitin sulfate degradation I (bacterial)	7.98663e-07	0.000219282	1.80405e-12	1.40789e-11	1.38778e-17	1.70751e-16
GLYCOGENSYNTH-PWY	glycogen biosynthesis I (from ADP-D-Glucose)	0.388427	0.342424	9.31532e-12	2.20409e-11	6.49353e-11	1.44601e-10
PWY-7196	superpathway of pyrimidine ribonucleosides salvage	0.261293	0.198659	9.49122e-12	2.24842e-11	1.01426e-12	2.6152e-12
PWY-6630	superpathway of L-tyrosine biosynthesis	0.249602	0.473607	3.45729e-12	3.09878e-11	3.92282e-12	2.70431e-11
PWY-5100	pyruvate fermentation to acetate and lactate II	0.110206	0.0813013	1.49325e-11	3.4822e-11	2.00345e-12	4.97548e-12
SER-GLYSYN-PWY	superpathway of L-serine and glycine biosynthesis I	0.626498	0.675293	1.53659e-11	3.58629e-11	3.3873e-11	7.6495e-11
PWY-5022	4-aminobutanoate degradation V	0.303366	0.346695	1.8774e-11	4.36222e-11	5.75021e-11	1.28655e-10
GLYOXYLATE-BYPASS	glyoxylate cycle	0.419397	0.40849	2.12024e-11	4.9047e-11	2.49805e-10	5.44459e-10
PWY-3661	glycine betaine degradation I	0.0418372	0.0872219	7.00642e-12	6.12904e-11	5.12222e-12	3.48125e-11
THISYN-PWY	superpathway of thiamin diphosphate biosynthesis I	0.324668	0.262522	3.22011e-11	7.39622e-11	1.71419e-12	4.2918e-12
PWY-6277	superpathway of 5-aminoimidazole ribonucleotide biosynthesis	0.594454	0.612955	4.12813e-11	9.41549e-11	1.6522e-09	3.45376e-09
PWY-6122	5-aminoimidazole ribonucleotide biosynthesis II	0.594454	0.612955	4.56765e-11	1.0379e-10	1.68554e-09	3.51946e-09
PWY-5507	adenosylcobalamin biosynthesis I (early cobalt insertion)	0.00327013	0.00477199	6.12565e-11	1.28248e-10	3.79619e-13	1.04112e-12
SO4ASSIM-PWY	sulfate reduction I (assimilatory)	0.520528	0.560317	8.21617e-11	1.8454e-10	1.41968e-09	2.97138e-09
PWY-5531	chlorophyllide a biosynthesis II (anaerobic)	0.026266	0.0349702	2.59317e-11	2.05205e-10	2.07182e-12	1.48106e-11
PWY-5427	naphthalene degradation (aerobic)	0.00122036	0.00413502	2.91435e-11	2.24441e-10	2.98419e-13	2.47612e-12
PWY-7159	chlorophyllide a biosynthesis III (aerobic, light independent)	0.026266	0.0349702	2.93955e-11	2.29198e-10	2.12724e-12	1.51827e-11
PWY-5028	L-histidine degradation II	0.112437	0.25422	3.09947e-11	2.42787e-10	1.10876e-09	6.75816e-09
DHGLUCONATE-PYR-CAT-PWY	glucose degradation (oxidative)	0.000458832	0.0171875	4.56753e-11	3.0466e-10	0	0
P461-PWY	hexitol fermentation to lactate, formate, ethanol and acetate	0.00386273	0.00867729	4.42657e-11	3.3706e-10	3.86739e-14	3.63693e-13
PWY-7527	L-methionine salvage cycle III	0.000772307	0.00010442	1.64596e-10	3.6168e-10	1.02111e-06	1.90221e-06
ASPASN-PWY	superpathway of L-aspartate and L-asparagine biosynthesis	0.0805276	0.247736	4.89158e-11	3.7005e-10	8.15808e-12	5.43701e-11
P101-PWY	ectoine biosynthesis	0.128973	0.0874725	1.66292e-10	3.71007e-10	8.89731e-11	1.97324e-10
METHGLYUT-PWY	superpathway of methylglyoxal degradation	0.00312477	0.00771662	4.95246e-11	3.76429e-10	5.98623e-12	4.04196e-11
PWY490-3	nitrate reduction VI (assimilatory)	0.0963607	0.0536091	1.8028e-10	4.0168e-10	7.68262e-12	1.80846e-11
PWY-7644	heparin degradation	7.98663e-07	0.000125304	9.18068e-11	5.76919e-10	1.73472e-18	2.04202e-17
PWY-6121	5-aminoimidazole ribonucleotide biosynthesis I	0.587578	0.625214	3.18557e-10	7.00469e-10	7.39587e-09	1.49492e-08
PWY-7328	superpathway of UDP-glucose-derived O-antigen building blocks biosynthesis	0.187628	0.366848	9.90133e-11	7.18804e-10	4.85444e-10	3.0435e-09
PWY-4361	S-methyl-5-thio-&alpha;-D-ribose 1-phosphate degradation	0.000465621	6.26519e-05	5.84373e-10	1.24299e-09	1.11383e-06	2.07051e-06
ARGDEG-PWY	superpathway of L-arginine, putrescine, and 4-aminobutanoate degradation	0.000969577	0.0156316	2.38319e-10	1.62304e-09	1.52356e-13	1.32962e-12
PWY-6956	naphthalene degradation to acetyl-CoA	0.00236484	0.00670375	2.8659e-10	1.99005e-09	1.86351e-12	1.35294e-11
ORNARGDEG-PWY	superpathway of L-arginine and L-ornithine degradation	0.000969577	0.0156316	4.1283e-10	2.71758e-09	1.47375e-13	1.29464e-12
ECASYN-PWY	enterobacterial common antigen biosynthesis	0.000509946	0.00706922	4.23193e-10	2.78804e-09	3.05259e-13	2.50179e-12
PWY-7002	4-hydroxyacetophenone degradation	3.99332e-06	0.00123215	5.23374e-10	3.27534e-09	1.27875e-09	7.48957e-09
LIPASYN-PWY	phospholipases	0.010627	0.0016916	1.59893e-09	3.42739e-09	3.17641e-10	6.87113e-10
PWY-7200	superpathway of pyrimidine deoxyribonucleoside salvage	0.370327	0.360405	1.83264e-09	3.89205e-09	4.45073e-09	9.08524e-09
KDO-NAGLIPASYN-PWY	superpathway of (Kdo)2-lipid A biosynthesis	0.00187087	0.0271178	7.88917e-10	5.0126e-09	1.37779e-13	1.21891e-12
PWY-7391	isoprene biosynthesis II (engineered)	0.00639689	0.000845801	2.56108e-09	5.42065e-09	2.13527e-10	4.66031e-10
PWY-6906	chitin derivatives degradation	0.00417901	0.00106508	2.73884e-09	5.66674e-09	6.19096e-11	1.37452e-10
PWY0-1261	anhydromuropeptides recycling	0.44989	0.442072	2.80429e-09	5.86787e-09	1.78282e-08	3.55134e-08
PWY0-1586	peptidoglycan maturation (meso-diaminopimelate containing)	0.49091	0.483109	3.42055e-09	7.19241e-09	3.3074e-11	7.481e-11
PWY0-862	(5Z)-dodec-5-enoate biosynthesis	0.451129	0.746549	1.0993e-09	7.37718e-09	3.34456e-08	1.81331e-07
P621-PWY	nylon-6 oligomer degradation	0.0298872	0.00961707	6.0074e-09	1.23823e-08	3.66528e-09	7.52957e-09
PWY-5647	2-nitrobenzoate degradation I	0.0445426	0.0220535	6.17682e-09	1.2726e-08	4.77771e-12	1.14024e-11
PWY-5104	L-isoleucine biosynthesis IV	0.300399	0.269675	6.43332e-09	1.31251e-08	4.11313e-07	7.81982e-07
PWY-6728	methylaspartate cycle	0.013721	0.00418723	7.97721e-09	1.58985e-08	2.73376e-08	5.41895e-08
PWY-5178	toluene degradation IV (aerobic) (via catechol)	0.0495451	0.036808	7.87457e-09	1.60381e-08	1.4569e-07	2.82375e-07
PWY-7332	superpathway of UDP-N-acetylglucosamine-derived O-antigen building blocks biosynthesis	0.0887083	0.056867	8.10328e-09	1.65087e-08	7.99907e-09	1.61626e-08
PWY-6876	isopropanol biosynthesis	0.0574822	0.0296239	8.52445e-09	1.73035e-08	8.11997e-10	1.72704e-09
PWY-6588	pyruvate fermentation to acetone	0.0601785	0.0296239	9.202e-09	1.86332e-08	7.20709e-10	1.53709e-09
PWY-5655	L-tryptophan degradation IX	0.0610454	0.035179	1.13355e-08	2.2805e-08	1.72236e-11	3.95651e-11
PWY-5941	glycogen degradation II (eukaryotic)	0.0983122	0.0749734	1.26185e-08	2.52378e-08	3.09245e-08	6.12197e-08
PWY-1361	benzoyl-CoA degradation I (aerobic)	0.00152465	0.0108701	4.26168e-09	2.57396e-08	1.52309e-15	1.66651e-14
SULFATE-CYS-PWY	superpathway of sulfate assimilation and cysteine biosynthesis	0.55551	0.629276	1.4967e-08	2.9718e-08	1.9218e-07	3.70252e-07
FERMENTATION-PWY	mixed acid fermentation	0.328715	0.28398	1.93601e-08	3.83087e-08	1.29472e-09	2.7207e-09
PWY-6282	palmitoleate biosynthesis I (from (5Z)-dodec-5-enoate)	0.475114	0.771276	6.52704e-09	4.13651e-08	1.32529e-07	6.89852e-07
DENOVOPURINE2-PWY	superpathway of purine nucleotides de novo biosynthesis II	0.188062	0.154541	2.33723e-08	4.60904e-08	5.83821e-10	1.2542e-09
GLYCOL-GLYOXDEG-PWY	superpathway of glycol metabolism and degradation	0.000155739	0.0031848	8.15748e-09	4.6617e-08	2.23814e-14	2.14627e-13
PWY-5304	superpathway of sulfur oxidation (Acidianus ambivalens)	0.0878945	0.0303548	3.73258e-08	7.28491e-08	6.87144e-08	1.34763e-07
PWY-7013	L-1,2-propanediol degradation	0.0235306	0.00429165	4.02797e-08	7.85659e-08	4.9565e-09	1.01269e-08
PWY-5266	p-cymene degradation	0.0926525	0	4.30252e-08	8.28225e-08	1.25127e-11	2.86352e-11
PWY-7187	pyrimidine deoxyribonucleotides de novo biosynthesis II	0.156789	0.134733	4.37037e-08	8.50279e-08	1.05933e-09	2.23604e-09
PWY-7664	oleate biosynthesis IV (anaerobic)	0.494241	0.790489	1.70017e-08	1.02275e-07	3.84898e-07	1.92628e-06
PWY-6519	8-amino-7-oxononanoate biosynthesis I	0.255419	0.518194	1.75252e-08	1.06145e-07	5.45324e-06	2.4851e-05
PWY-5273	p-cumate degradation	0.0926525	0	6.16984e-08	1.16577e-07	1.21894e-11	2.78795e-11
PWYG-321	mycolate biosynthesis	0.520084	0.831119	2.15917e-08	1.26964e-07	4.518e-07	2.24701e-06
FUC-RHAMCAT-PWY	superpathway of fucose and rhamnose degradation	0.000276337	0.00493906	2.49503e-08	1.39396e-07	2.78423e-15	2.94749e-14
PWY0-42	2-methylcitrate cycle I	0.0553042	0.15096	2.70612e-08	1.61009e-07	2.79601e-06	1.30995e-05
PWY-6470	peptidoglycan biosynthesis V (&beta;-lactam resistance)	0.0195054	0.00553425	9.58371e-08	1.79611e-07	8.11176e-09	1.63784e-08
PWY0-1479	tRNA processing	0.143144	0.264746	3.43846e-08	2.01296e-07	6.66061e-09	3.81123e-08
RUMP-PWY	formaldehyde oxidation I	0.0183133	0.0318898	6.56671e-08	3.71171e-07	4.83627e-09	2.81794e-08
PWY-1861	formaldehyde assimilation II (RuMP Cycle)	0.0242666	0.0416739	8.96143e-08	4.95227e-07	6.27601e-09	3.60611e-08
P125-PWY	superpathway of (R,R)-butanediol biosynthesis	0.0460066	0.0786803	9.07054e-08	5.00219e-07	7.84976e-10	4.83941e-09
CHLOROPHYLL-SYN	chlorophyllide a biosynthesis I (aerobic, light-dependent)	0.00208291	0.00135746	1.06873e-07	5.50488e-07	1.83344e-12	1.3377e-11
FOLSYN-PWY	superpathway of tetrahydrofolate biosynthesis and salvage	0.44886	0.519489	3.2067e-07	6.11514e-07	2.96187e-06	5.42604e-06
PWY-5705	allantoin degradation to glyoxylate III	0.0734682	0.113316	1.18073e-07	6.41002e-07	1.21579e-07	6.34789e-07
PWY-6151	S-adenosyl-L-methionine cycle I	0.191651	0.269173	1.35906e-07	7.30442e-07	2.98102e-06	1.39248e-05
PWY-2221	Entner-Doudoroff pathway III (semi-phosphorylative)	0.0224756	9.39778e-05	6.02738e-07	1.05679e-06	1.77875e-16	1.56189e-15
ORNDEG-PWY	superpathway of ornithine degradation	0.0276629	0.117817	2.07727e-07	1.09424e-06	3.98986e-16	4.73248e-15
PWY-7198	pyrimidine deoxyribonucleotides de novo biosynthesis IV	0.000357801	0	6.15376e-07	1.11502e-06	9.25826e-09	1.78776e-08
PWY-7616	methanol oxidation to carbon dioxide	0.117041	0.0475632	6.85734e-07	1.29677e-06	1.56105e-06	2.89622e-06
PRPP-PWY	superpathway of histidine, purine, and pyrimidine biosynthesis	0.199565	0.189668	7.30434e-07	1.37682e-06	8.51121e-09	1.71631e-08
PWY-7210	pyrimidine deoxyribonucleotides biosynthesis from CTP	0.000513141	0	1.01649e-06	1.79608e-06	1.76159e-09	3.55272e-09
PWY-6612	superpathway of tetrahydrofolate biosynthesis	0.416096	0.476311	9.90289e-07	1.84522e-06	5.91481e-06	1.07243e-05
HISDEG-PWY	L-histidine degradation I	0.373839	0.41558	1.19652e-06	2.22868e-06	5.3916e-07	1.02032e-06
PWY0-1277	3-phenylpropanoate and 3-(3-hydroxyphenyl)propanoate degradation	0.0788073	0.0483673	1.31188e-06	2.4421e-06	3.24401e-06	5.93513e-06
PWY-4984	urea cycle	0.291232	0.285828	1.42762e-06	2.64885e-06	3.39676e-06	6.21743e-06
NAD-BIOSYNTHESIS-II	NAD salvage pathway II	0.107594	0.0541626	1.69501e-06	3.1415e-06	1.79872e-07	3.47528e-07
PWY-5989	stearate biosynthesis II (bacteria and plants)	0.499714	0.771568	6.27512e-07	3.14383e-06	4.98663e-06	2.28056e-05
HEXITOLDEGSUPER-PWY	superpathway of hexitol degradation (bacteria)	0.0186456	0.0252696	7.01008e-07	3.5404e-06	9.79935e-09	5.51423e-08
PWY-6892	thiazole biosynthesis I (E. coli)	0.138926	0.0965152	1.94504e-06	3.58877e-06	1.4811e-07	2.86932e-07
PWY-7398	coumarins biosynthesis (engineered)	4.99165e-05	4.17679e-05	7.43206e-07	3.61156e-06	1.2087e-09	7.21155e-09
PWY0-41	allantoin degradation IV (anaerobic)	0.00183054	0.0118621	1.15035e-06	5.56725e-06	2.51476e-08	1.37524e-07
PWY-6992	1,5-anhydrofructose degradation	0.0180394	0.0301669	1.26898e-06	6.26798e-06	2.13109e-07	1.08956e-06
PWY-6944	androstenedione degradation	0.0253304	0.0139818	5.18315e-06	9.4399e-06	6.18669e-07	1.16765e-06
PWY-5529	superpathway of bacteriochlorophyll a biosynthesis	0.00347259	0.00249563	2.5236e-06	1.08936e-05	1.28875e-12	9.66263e-12
PWY-3941	&beta;-alanine biosynthesis II	0.00090209	0.000135746	6.57774e-06	1.18121e-05	5.63572e-06	1.0134e-05
PWY-6562	norspermidine biosynthesis	0.0416894	0.0544654	2.95772e-06	1.42021e-05	1.11922e-06	5.44055e-06
PWY-7111	pyruvate fermentation to isobutanol (engineered)	1.10821	1.17644	9.15847e-06	1.6588e-05	5.1254e-05	9.02415e-05
P341-PWY	glycolysis V (Pyrococcus)	0.000143759	0.000125304	7.13049e-06	3.29744e-05	1.49725e-08	8.21263e-08
PWY-6471	peptidoglycan biosynthesis IV (Enterococcus faecium)	0.0227567	0.00630696	1.95045e-05	3.48971e-05	1.17997e-06	2.20109e-06
PWY-5154	L-arginine biosynthesis III (via N-acetyl-L-citrulline)	0.434455	0.520982	2.63557e-05	4.70162e-05	4.02904e-05	7.11314e-05
1CMET2-PWY	N10-formyl-tetrahydrofolate biosynthesis	0.465945	0.570258	2.65701e-05	4.7408e-05	0.000157875	0.000272108
ARG+POLYAMINE-SYN	superpathway of arginine and polyamine biosynthesis	0.192088	0.27901	2.94511e-05	5.25032e-05	2.5197e-05	4.50525e-05
AEROBACTINSYN-PWY	aerobactin biosynthesis	0.000365388	0.00121127	1.19044e-05	5.34419e-05	4.91972e-11	3.17415e-10
PWY-2941	L-lysine biosynthesis II	0.0005974	0.000125304	4.02887e-05	6.82322e-05	0.000369373	0.000626399
PWY-7237	myo-, chiro- and scillo-inositol degradation	0.241933	0.484748	2.23457e-05	0.000103246	2.57317e-06	1.21322e-05
TCA-GLYOX-BYPASS	superpathway of glyoxylate bypass and TCA	0.430223	0.481751	6.22809e-05	0.000109498	0.000422993	0.00071673
CRNFORCAT-PWY	creatinine degradation I	0.0044238	0.000595193	6.7834e-05	0.000114409	7.5986e-12	1.78656e-11
PWY-5747	2-methylcitrate cycle II	0.0678564	0.166706	3.69847e-05	0.000167695	0.00136779	0.00553726
CODH-PWY	reductive acetyl coenzyme A pathway	0.0135002	0.00635917	0.000133778	0.000233524	0.000114961	0.000199145
P281-PWY	3-phenylpropanoate degradation	0.110206	0.0942076	0.000137549	0.000240448	9.15584e-05	0.000159416
PWY-1501	mandelate degradation I	0.0116757	0.00711099	0.000223878	0.000387487	9.82424e-05	0.000170595
PWY-5183	superpathway of aerobic toluene degradation	0.0282435	0.0105568	0.000242834	0.0004202	4.8842e-05	8.614e-05
P162-PWY	L-glutamate degradation V (via hydroxyglutarate)	9.58396e-05	0	0.000260589	0.00043547	8.70851e-05	0.000144775
PWY-7316	dTDP-N-acetylviosamine biosynthesis	7.98663e-07	2.0884e-05	0.000112649	0.000460214	2.70473e-06	1.2245e-05
PWY-5920	superpathway of heme biosynthesis from glycine	0.329536	0.351519	0.000363686	0.000623721	0.000885331	0.00147964
PWY-6942	dTDP-D-desosamine biosynthesis	7.98663e-07	2.0884e-05	0.000158214	0.000652221	5.44063e-06	2.39073e-05
NADSYN-PWY	NAD biosynthesis II (from tryptophan)	0.0916502	0.0677998	0.000487563	0.000832681	5.48836e-05	9.64395e-05
SALVADEHYPOX-PWY	adenosine nucleotides degradation II	0.579536	0.637692	0.000514142	0.000876908	0.000591688	0.000996201
VALDEG-PWY	L-valine degradation I	0.00116964	0.000438563	0.000567793	0.000965193	0.0014367	0.00236951
PWY-5177	glutaryl-CoA degradation	4.79198e-05	0	0.000704063	0.00115994	4.69711e-05	7.95778e-05
PPGPPMET-PWY	ppGpp biosynthesis	0.2095	0.343479	0.000295152	0.00125983	0.000752318	0.00312475
BIOTIN-BIOSYNTHESIS-PWY	biotin biosynthesis I	0.269245	0.465211	0.000301174	0.00128666	0.0038077	0.0148203
FASYN-INITIAL-PWY	superpathway of fatty acid biosynthesis initiation (E. coli)	0.439449	0.664726	0.000310467	0.0013168	0.00160262	0.00643007
FUCCAT-PWY	fucose degradation	0.00194035	0.00296552	0.000320156	0.00136393	9.06206e-05	0.000397386
THREOCAT-PWY	superpathway of L-threonine metabolism	7.5873e-06	0.00202574	0.000373969	0.00150067	0.000213517	0.00088598
PWY-6507	4-deoxy-L-threo-hex-4-enopyranuronate degradation	0.163957	0.21476	0.000428017	0.00179716	0.000207525	0.00089295
PROTOCATECHUATE-ORTHO-CLEAVAGE-PWY	protocatechuate degradation II (ortho-cleavage pathway)	0.374293	0.51338	0.00152473	0.00255959	0.00287593	0.00470821
PWY-5651	L-tryptophan degradation to 2-amino-3-carboxymuconate semialdehyde	0.0632338	0.0454853	0.00157109	0.00263565	0.000332724	0.000566821
POLYAMSYN-PWY	superpathway of polyamine biosynthesis I	0.122043	0.200225	0.0016623	0.00278504	0.000696096	0.00116943
GALACTUROCAT-PWY	D-galacturonate degradation I	0.176856	0.219188	0.000694667	0.00284543	0.000687175	0.00286403
PWY-6977	superpathway of erythromycin biosynthesis	3.99332e-07	1.0442e-05	0.000873814	0.00332396	2.887e-05	0.000122652
PWY-6919	neopentalenoketolactone and pentalenate biosynthesis	0.00068725	0	0.002099	0.0034105	4.85847e-06	8.75363e-06
GOLPDLCAT-PWY	superpathway of glycerol degradation to 1,3-propanediol	0.00116725	0.00109641	0.000870663	0.0035293	0.000586107	0.0024205
PWY-6749	CMP-legionaminate biosynthesis I	0.0379892	0.0232334	0.00236516	0.00393797	0.000961835	0.0016062
PWY-6975	superpathway of erythromycin biosynthesis (without sugar biosynthesis)	3.99332e-07	1.0442e-05	0.00119413	0.00460139	6.53005e-05	0.000276505
PWY-7106	erythromycin D biosynthesis	3.99332e-07	1.0442e-05	0.00121515	0.00466169	8.30556e-05	0.000339378
GLUCUROCAT-PWY	superpathway of &beta;-D-glucuronide and D-glucuronate degradation	0.15247	0.214729	0.00122428	0.00491419	0.00271024	0.0106531
PWY-7110	superpathway of megalomicin A biosynthesis	3.99332e-07	1.0442e-05	0.00171525	0.00596307	0.000136195	0.000525759
PWY-7446	sulfoglycolysis	0.000387751	0.00174381	0.00158057	0.00630157	0.000172438	0.000739431
COBALSYN-PWY	adenosylcobalamin salvage from cobinamide I	0.303476	0.373447	0.00478542	0.00789301	0.0143678	0.0229271
PWY-3801	sucrose degradation II (sucrose synthase)	0	0	0.00233804	0.00875919	0.008809	0.0323366
3-HYDROXYPHENYLACETATE-DEGRADATION-PWY	4-hydroxyphenylacetate degradation	0.0294854	0.0264809	0.00790072	0.0129261	0.00261662	0.00428941
PWY-722	nicotinate degradation I	0.00797106	0.00705878	0.00364252	0.0142726	0.00165945	0.00664883
PWY-6895	superpathway of thiamin diphosphate biosynthesis II	0.0108894	0.0197667	0.00952908	0.015543	0.00214592	0.00353289
PWY-6957	mandelate degradation to acetyl-CoA	0.0188972	0.0113609	0.00978897	0.0159456	0.00640986	0.0103342
PWY-5499	vitamin B6 degradation	0.000320663	0	0.0106791	0.0170921	0.000248322	0.000420392
PWY5F9-12	biphenyl degradation	0.000925251	6.26519e-05	0.0121458	0.0192576	2.74809e-05	4.85968e-05
PWY-7431	aromatic biogenic amine degradation (bacteria)	0.337096	0.571354	0.00501163	0.0194228	0.0126976	0.0480263
CENTBENZCOA-PWY	benzoyl-CoA degradation II (anaerobic)	6.26951e-05	0	0.0129122	0.0199983	0.00504974	0.00800015
PWY-6891	thiazole biosynthesis II (Bacillus)	0.00226541	0.00409326	0.0128462	0.0208026	0.00300255	0.00490512
PWY0-1061	superpathway of L-alanine biosynthesis	0.282096	0.356844	0.0151481	0.0244752	0.0211645	0.0335862
PWY-7254	TCA cycle VII (acetate-producers)	0.239797	0.490418	0.0066905	0.0256931	0.0358126	0.131957
PWY-1541	superpathway of taurine degradation	0.000453241	0	0.0216195	0.0340451	0.00415296	0.00671092
PWY-5677	succinate fermentation to butanoate	0.00116365	0.00110685	0.00917063	0.0349204	0.00138415	0.00558532
LEU-DEG2-PWY	L-leucine degradation I	0.320112	0.413732	0.0228163	0.0365494	0.0313453	0.0495027
POLYAMINSYN3-PWY	superpathway of polyamine biosynthesis II	0.113641	0.199066	0.0251683	0.0402751	0.0089671	0.0143954
PWY-7242	D-fructuronate degradation	0.282167	0.368216	0.0116498	0.0440737	0.00644402	0.0248036

## Sheet: Table_S7
Table S1. Fungal taxa differentially represented between rootstocks microbioms. The values represent % of the reads in the group. Benjamini-Hochberg corrected P value of Kruskal-Wallace test, kw.eBH < 0.05. Genera level annotation.
Taxa	G210_rel_abnd_%	G214_rel_abnd_%	G969_rel_abnd_%	G890_rel_abnd_%	G935_rel_abnd_%	G41_rel_abnd_%	Bud118_rel_abnd_%	Pajam2_rel_abnd_%	Supporter4_rel_abnd_%	M26_rel_abnd_%	glm.eBH	glm.ep	kw.eBH	kw.ep
k__Fungi;p__Ascomycota;c__Leotiomycetes;o__Helotiales;f__Helotiales_fam_Incertae_sedis;g__Mycoarthris	0.432269	0.541464	0.0374749	1.52953	1.92848	4.2301	17.1541	0.853735	1.38845	3.9576	7.11e-19	3.41e-20	1.36e-10	2.73e-12
k__Fungi;p__Ascomycota;c__Sordariomycetes;o__Hypocreales;f__Nectriaceae;g__Dactylonectria	3.13252	0.371089	0.510819	2.24934	3.09182	5.83134	10.6159	2.53543	5.12452	6.09611	8.59e-13	1.42e-13	2.38e-09	1.62e-10
k__Fungi;p__Ascomycota;c__Leotiomycetes;o__Helotiales;f__Helotiaceae;g__Tetracladium	6.07692	1.65321	0.334151	14.117	9.4951	9.90815	9.46527	6.30496	4.30656	5.96846	1.99e-15	1.54e-16	8.96e-07	2.26e-07
k__Fungi;p__Ascomycota;c__Sordariomycetes;o__Hypocreales;f__Nectriaceae;g__Ilyonectria	2.67276	0.481391	1.42538	2.91134	0.660206	6.72112	7.54903	2.05509	5.832	4.15173	1.9e-17	8.59e-19	1.19e-09	6.36e-11
k__Fungi;p__Ascomycota;c__Leotiomycetes;o__Helotiales;__;__	2.24954	9.66527	7.35088	5.67263	5.17541	5.81127	5.50016	31.8821	21.6068	16.2751	1.2e-28	5.48e-31	4.27e-11	3.73e-13
k__Fungi;p__Ascomycota;c__Leotiomycetes;o__Helotiales;f__Helotiaceae;g__Scytalidium	8.25168	2.96466	3.14522	0.574295	1.52766	2.35414	4.43648	1.11308	3.97456	0.559605	1.56e-05	6.68e-06	0.000251382	0.000120723
k__Fungi;p__Ascomycota;c__Dothideomycetes;o__Capnodiales;f__Cladosporiaceae;g__Cladosporium	9.45626	3.39521	1.25764	2.90193	0.55267	0.906985	4.35648	1.83745	2.41439	1.62434	9.39e-15	8.45e-16	2.29e-08	2.92e-09
k__Fungi;p__Ascomycota;c__Leotiomycetes;o__Helotiales;f__Hyaloscyphaceae;g__Hyaloscypha	10.6065	9.20945	7.96297	14.0784	24.3227	24.3976	3.96605	6.65046	7.94684	7.48324	3.04e-09	6.9e-10	2.45e-06	7.23e-07
k__Fungi;p__Ascomycota;c__Dothideomycetes;o__Pleosporales;f__Didymellaceae;__	1.84578	5.51865	1.00647	2.49297	0.753404	0.828269	3.26414	2.86114	9.17292	6.66339	2.66e-10	4.88e-11	7.68e-07	1.89e-07
k__Fungi;p__Ascomycota;c__Leotiomycetes;o__Helotiales;f__Dermateaceae;g__Davidhawksworthia	0.0563392	0.000913	0.0347981	4.18396	0.00782	1.47011	2.52212	0.337286	3.99154	3.49011	4.29e-15	4.14e-16	3.33e-09	2.49e-10
k__Fungi;p__Ascomycota;c__Sordariomycetes;o__Xylariales;f__Bartaliniaceae;g__Truncatella	0.517448	0.00609	0.00134	0.147394	0.168799	0.145003	2.02314	0.0468141	0.472803	0.375629	1.29e-11	2.33e-12	4.24e-09	3.53e-10
k__Fungi;p__Basidiomycota;c__Tremellomycetes;o__Cystofilobasidiales;f__Cystofilobasidiaceae;g__Cystofilobasidium	8.13833	0.327151	0.0200758	0.346172	0.0215072	0.0809466	0.0942737	0.00697	0.185076	0.163177	8.37e-12	1.52e-12	5.46e-09	4.86e-10
k__Fungi;p__Ascomycota;c__Sordariomycetes;o__Ophiostomatales;f__Ophiostomataceae;g__Sporothrix	7.78084	0.0139019	0.0058	0.0243627	0.00587	0.102139	0.111468	0.188003	0.351836	0.0807218	1.75e-07	7.19e-08	7.99e-07	2.05e-07
k__Fungi;p__Ascomycota;c__Leotiomycetes;o__Helotiales;f__Hyaloscyphaceae;__	2.40984	10.4252	19.3313	3.41786	3.90649	3.5889	1.27223	2.02297	1.36365	1.95218	4.24e-15	3.48e-16	8.04e-08	1.3e-08
k__Fungi;p__Ascomycota;c__Leotiomycetes;o__Helotiales;f__Mollisiaceae;g__Phialocephala	2.36256	3.30835	4.21548	2.41058	3.28539	4.31312	1.05011	3.50857	2.70097	2.72696	2.28e-06	8.43e-07	6.26e-05	2.62e-05
k__Fungi;p__Ascomycota;c__Leotiomycetes;o__Helotiales;f__Hyaloscyphaceae;g__Glutinomyces	2.03156	0.146427	0.460406	0.0852694	0.0338901	0.257499	0.142463	0.00896	0.625253	0.0141139	2.75e-05	1.39e-05	4.26e-05	1.73e-05
k__Fungi;p__Ascomycota;c__Sordariomycetes;o__Coniochaetales;f__Coniochaetaceae;g__Coniochaeta	0.908804	8.3801	5.74348	0.570641	1.63781	0.184042	0.38575	1.07486	0.471277	0.616556	2.14e-18	7.75e-20	1.53e-08	1.79e-09
k__Fungi;p__Basidiomycota;c__Agaricomycetes;o__Sebacinales;__;__	1.43732	7.41773	1.72831	1.65533	4.8893	1.16863	0.774074	2.643	1.47928	2.06509	1.76e-08	4.51e-09	8.03e-06	2.67e-06
k__Fungi;p__Ascomycota;c__Dothideomycetes;o__Pleosporales;f__Phaeosphaeriaceae;g__Paraphoma	1.45744	7.24959	3.12157	2.92629	2.03341	0.243955	1.1645	0.852241	1.37128	0.656051	3.19e-08	8.51e-09	3.62e-05	1.42e-05
k__Fungi;p__Ascomycota;c__Leotiomycetes;o__Helotiales;f__Ploettnerulaceae;g__Cadophora	0.00134	6.18371	1.74615	0.0174968	0.565053	0.0387205	0.0183635	0.00299	0.546834	0.00495	3.59e-15	3.36e-16	2.48e-09	1.79e-10
k__Fungi;p__Basidiomycota;c__Agaricomycetes;o__Cantharellales;f__Hydnaceae;g__Sistotrema	0.911487	2.06651	7.94959	0.203318	0.149899	0.576028	0.192407	0.227472	2.23828	0.405961	2.78e-07	1.01e-07	9.57e-07	2.44e-07
k__Fungi;p__Ascomycota;c__Sordariomycetes;o__Sordariales;f__Chaetomiaceae;g__Dichotomopilus	0.0905451	0.295086	0.794557	3.61199	0.640002	0.100227	0.0390663	0.123385	0.0910118	0.186948	1.28e-26	1.07e-28	5.4e-11	6.48e-13
k__Fungi;p__Ascomycota;c__Dothideomycetes;o__Pleosporales;f__Neopyrenochaetaceae;g__Neopyrenochaeta	0.807528	0.378395	1.04394	2.14181	0.756662	0.700475	0.985196	1.46668	1.11504	0.778371	0.00367096	0.00231953	0.00529362	0.00337983
k__Fungi;p__Basidiomycota;c__Agaricomycetes;o__Agaricales;f__Entolomataceae;g__Clitopilus	0.0127434	0.168243	1.76355	0.0466213	5.09525	0.0473251	0.0619914	0.00834	0.954765	2.65342	4.04e-05	2.01e-05	0.000240363	0.000119403
k__Fungi;p__Basidiomycota;c__Agaricomycetes;o__Agaricales;f__Stephanosporaceae;g__Lindtneria	0.435622	0	0	0	4.77264	0	0	0	0	0	8.05e-06	4.19e-06	0.00265821	0.0017678
k__Fungi;p__Basidiomycota;c__Agaricomycetes;o__Agaricales;f__Stephanosporaceae;__	0.429922	0	0	0.54351	3.64645	0	0	0.022909	0	0	8.3e-06	4.04e-06	0.00128747	0.000780865
k__Fungi;p__Basidiomycota;c__Agaricomycetes;o__Auriculariales;f__Auriculariales_fam_Incertae_sedis;g__Oliveonia	0.603634	0.710214	1.59759	0.106974	3.17329	0.751784	0.744014	0.00697	0.0169812	0.0177043	4.38e-08	1.28e-08	1.7e-06	4.8e-07
k__Fungi;p__Ascomycota;c__Sordariomycetes;o__Hypocreales;f__Hypocreaceae;g__Trichoderma	0.423885	0.166721	13.4169	0.693229	1.00953	0.371749	0.724598	0.401655	0.191754	0.534473	1.09e-05	4.57e-06	0.00307062	0.00187131
k__Fungi;p__Basidiomycota;c__Agaricomycetes;o__Trechisporales;f__Trechisporales_fam_Incertae_sedis;g__Sertulicium	1.50238	0.0102488	0.0223065	0.0693229	0.0013	6.04725	0.000702	0.0390947	2.2648	0	7.1e-10	1.81e-10	1.08e-07	2.04e-08
k__Fungi;p__Ascomycota;c__Sordariomycetes;o__Hypocreales;f__Nectriaceae;g__Nectria	0.375259	0.0526649	0.0655811	0.412172	0.551366	4.07394	1.95179	4.7591	3.02228	3.709	2.59e-14	3.06e-15	2.2e-10	6.11e-12
k__Fungi;p__Ascomycota;c__Leotiomycetes;o__Helotiales;f__Discinellaceae;__	0.929932	0.370176	0.282846	0.0394233	0.724727	2.33024	0	0.00212	0.013356	0	1.99e-14	2.2e-15	4.09e-09	3.71e-10
k__Fungi;p__Basidiomycota;c__Agaricomycetes;o__Sebacinales;f__Serendipitaceae;g__Serendipita	0.280019	0.0701183	0.00357	0.159797	0.263952	0.152333	0.506575	2.18495	0.347066	0.935358	3.24e-14	3.74e-15	9.65e-09	9.81e-10
k__Fungi;p__Ascomycota;c__Leotiomycetes;__;__;__	0.00771	0.0601739	0.144546	0.686364	0.181834	0.132415	0.270891	0.0875274	0.924046	0.00421	2.39e-06	1.21e-06	7.63e-06	2.57e-06
k__Fungi;p__Ascomycota;c__Sordariomycetes;o__Hypocreales;f__Nectriaceae;g__Fusarium	1.26495	1.23077	0.241802	0.665877	0.246355	0.191531	0.452654	1.51984	0.754425	3.60005	3.47e-10	8.75e-11	1.27e-07	2.26e-08
k__Fungi;p__Ascomycota;c__Eurotiomycetes;o__Eurotiales;f__Aspergillaceae;g__Talaromyces	1.56509	0.32847	0.35155	0.847268	0.262649	0.19424	0.673133	0.295203	0.65311	0.414876	1.08e-06	3.87e-07	6.48e-06	2.14e-06
k__Fungi;p__Ascomycota;c__Dothideomycetes;o__Pleosporales;f__Pleosporales_fam_Incertae_sedis;g__Berkleasmium	0.0399069	0.109794	0.397948	0.851255	0.0384523	0.0768037	1.34065	1.79537	0.586711	3.6799	1.47e-12	2.2e-13	4.85e-10	1.97e-11
k__Fungi;p__Ascomycota;c__Sordariomycetes;o__Sordariales;f__Cephalothecaceae;g__Phialemonium	0.277336	0.0393718	0.158376	1.7828	0.768394	0.196311	0.0485405	1.83484	0.459829	0.841265	1.82e-11	2.84e-12	1.94e-07	3.77e-08
k__Fungi;p__Ascomycota;c__Eurotiomycetes;o__Eurotiales;f__Aspergillaceae;g__Penicillium	0.302488	0.188944	0.0352443	1.47527	0.10167	0.272159	0.160125	0.976248	0.436933	0.799295	6.96e-11	1.58e-11	2.48e-10	7.52e-12
k__Fungi;p__Basidiomycota;c__Agaricomycetes;o__Agaricales;f__Mycenaceae;g__Mycena	0	0.000203	0	0.184824	0.00652	0.854242	1.35492	0.714537	0.416326	0.0664841	3.65e-08	1.28e-08	1.05e-06	2.86e-07
k__Fungi;p__Basidiomycota;c__Tremellomycetes;o__Tremellales;f__Cryptococcaceae;g__Cryptococcus	1.00539	1.07674	0.212804	0.52258	0.0736459	0.219894	0.248784	0.346997	0.389042	2.12811	4.67e-10	1.27e-10	1.32e-07	2.38e-08
k__Fungi;p__Ascomycota;c__Sordariomycetes;o__Hypocreales;f__Hypocreales_fam_Incertae_sedis;g__Sarocladium	0.0975875	0.318932	0.64555	0.147948	0.245052	0.030116	1.52932	0.432532	0.377594	0.030085	9.53e-09	2.42e-09	4.22e-07	9.49e-08
k__Fungi;p__Ascomycota;c__Sordariomycetes;o__Hypocreales;f__Nectriaceae;g__Cylindrocladiella	0.00201	0.00315	0	0.000443	0.00196	0.000637	0.121644	0.299809	0.355843	0.348515	1.17e-16	9.07e-18	3.55e-10	1.31e-11
k__Fungi;p__Ascomycota;c__Eurotiomycetes;o__Eurotiales;f__Aspergillaceae;g__Paecilomyces	0.154262	0.217154	0.0245371	0.158579	0.144033	0.441223	0.143165	0.292837	0.297458	0.137301	4.85e-09	1.56e-09	2.17e-08	2.81e-09
k__Fungi;p__Ascomycota;c__Dothideomycetes;o__Pleosporales;f__Melanommataceae;g__Pleotrichocladium	0.0392362	0.124508	0.0107071	0.114948	0.0404075	0.0834961	0.930339	0.157375	0.296313	0.515902	1.24e-10	2.86e-11	1.07e-09	5.63e-11
k__Fungi;p__Ascomycota;c__Pezizomycotina_cls_Incertae_sedis;o__Pezizomycotina_ord_Incertae_sedis;f__Pezizomycotina_fam_Incertae_sedis;g__Tricellula	0.102282	0.113346	0.054874	0.0370977	0.0189003	0.0384018	0.110298	0.141812	0.281812	0.244518	2.72e-06	1.36e-06	3.28e-08	4.53e-09
k__Fungi;p__Basidiomycota;c__Agaricomycetes;o__Sebacinales;f__Serendipitaceae;__	0.0449372	0.12603	0.00669	0.0600208	0.236579	0.0086	0.0154394	0.113674	0.260443	0.0905026	0.00272806	0.00175941	0.000730712	0.000398267
k__Fungi;p__Mortierellomycota;c__Mortierellomycetes;o__Mortierellales;f__Mortierellaceae;g__Mortierella	0.516778	1.04457	0.301138	0.402095	0.381264	0.272159	0.164336	0.253742	0.24079	0.102017	0.382004	0.361538	0.011371	0.00786242
k__Fungi;p__Basidiomycota;c__Tremellomycetes;o__Filobasidiales;f__Piskurozymaceae;g__Solicoccozyma	0.199199	0.0319642	0.0111532	0.155146	0.0951531	0.1262	0.14106	0.841658	0.234685	0.741972	1.49e-11	3.33e-12	7.93e-11	1.27e-12
k__Fungi;p__Ascomycota;c__Dothideomycetes;o__Pleosporales;f__Pleosporaceae;g__Alternaria	0.28572	0.428726	0.209681	0.261456	0.0938496	0.0533802	0.368557	0.142434	0.222664	0.496712	3.54e-06	1.88e-06	7.93e-07	2.05e-07
k__Fungi;p__Basidiomycota;c__Agaricomycetes;o__Cantharellales;__;__	0.0382301	0.243334	0.0704885	0.0283493	0.0104277	0.0240609	0.0529851	0.12849	0.218085	0.00718	3.27e-05	1.76e-05	2.63e-05	1.02e-05
k__Fungi;p__Ascomycota;c__Saccharomycetes;o__Saccharomycetales;f__Lipomycetaceae;g__Dipodascopsis	0.0368887	0.00436	0	0.0330004	0.00456	0.0205553	0.0182465	0.532261	0.18355	0.0740363	1.73e-11	3.13e-12	1.39e-10	3.21e-12
k__Fungi;p__Ascomycota;c__Leotiomycetes;o__Helotiales;f__Sclerotiniaceae;g__Botrytis	1.13114	0.0229331	0.096364	0.318487	0.019552	0.172729	1.51937	0.0305039	0.175536	0.023028	7.11e-08	2.67e-08	1.79e-08	2.2e-09
k__Fungi;p__Ascomycota;c__Dothideomycetes;o__Pleosporales;f__Leptosphaeriaceae;g__Plenodomus	0.181761	0.706866	0.1441	0.120152	0.323911	0.242521	0.663893	0.110312	0.173056	0.433447	5.94e-07	2.71e-07	4.42e-08	6.45e-09
k__Fungi;p__Ascomycota;c__Leotiomycetes;o__Helotiales;f__Myxotrichaceae;g__Amorphotheca	1.19687	0.0791495	0.00803	1.12522	0.118615	0.227384	0.137551	0.617548	0.167332	0.261727	1.18e-13	1.5e-14	2.27e-10	6.69e-12
k__Fungi;p__Ascomycota;c__Eurotiomycetes;o__Chaetothyriales;f__Herpotrichiellaceae;g__Cladophialophora	0.0989289	0.0127857	0.0245371	0.103431	0.0241141	0.0952876	0.0548566	0.0501757	0.161226	0.0621509	2.19e-07	8.95e-08	2.29e-07	4.93e-08
k__Fungi;p__Basidiomycota;c__Agaricomycetes;o__Agaricales;f__Hymenogastraceae;g__Gymnopilus	0	0.00649	0.0330136	0.0150606	0.0260693	0	0	0.000747	0.15493	0	0.00108148	0.000850107	5.34e-05	2.53e-05
k__Fungi;p__Ascomycota;c__Eurotiomycetes;o__Chaetothyriales;f__Herpotrichiellaceae;g__Exophiala	0.15728	0.137598	0.207896	0.118048	0.227455	0.0575231	0.183752	0.102593	0.154167	0.265565	0.000306094	0.000189493	3.34e-05	1.34e-05
k__Fungi;p__Basidiomycota;c__Tremellomycetes;o__Filobasidiales;f__Filobasidiaceae;g__Naganishia	0.148896	0.236535	0.0843185	0.200217	0.158371	0.0430228	0.0608218	0.163974	0.153213	0.659393	3.21e-06	1.62e-06	2.96e-07	6.32e-08
k__Fungi;p__Basidiomycota;c__Tremellomycetes;o__Trichosporonales;f__Trichosporonaceae;g__Apiotrichum	0.00201	0.00426	0	0.0291245	0.0130347	0.66526	0.15182	0.102717	0.148443	0.0142377	4.27e-11	7.98e-12	2.21e-09	1.62e-10
k__Fungi;p__Basidiomycota;c__Tremellomycetes;o__Tremellales;f__Bulleribasidiaceae;g__Vishniacozyma	0.664333	0.637153	0.267678	0.415273	0.0775563	0.0776004	0.365983	0.130108	0.142528	0.163672	0.000133064	9.37e-05	1.93e-07	3.83e-08
k__Fungi;p__Basidiomycota;c__Tremellomycetes;o__Tremellales;f__Trimorphomycetaceae;g__Saitozyma	0.153591	0.0314568	0.0129378	0.552258	0.0501835	0.299407	0.120591	0.378248	0.139475	0.169243	9.14e-09	2.82e-09	2.16e-09	1.46e-10
k__Fungi;p__Ascomycota;c__Leotiomycetes;o__Helotiales;f__Helotiales_fam_Incertae_sedis;__	0.0727714	0.0624063	0.0124916	0.679498	0.151202	0.0172091	0.132287	0.0341145	0.130126	0.876179	1.8e-05	8.29e-06	3.24e-05	1.27e-05
k__Fungi;p__Ascomycota;__;__;__;__	0.169353	0.658564	0.607629	1.45711	0.505745	0.157113	0.0283055	0.36007	0.129744	0.233623	6.54e-15	6.08e-16	1.1e-08	1.2e-09
k__Fungi;p__Ascomycota;c__Leotiomycetes;o__Helotiales;f__Dermateaceae;g__Diplocarpa	0	0.000203	0	0.000997	0	0	0.020118	0.113674	0.114671	0.0207995	1.16e-07	4.13e-08	7.9e-07	2.19e-07
k__Fungi;p__Ascomycota;c__Dothideomycetes;o__Dothideales;f__Dothideales_fam_Incertae_sedis;g__unidentified	0.0395716	0.0852379	0.0182913	0.330558	0.0664768	0.0517867	0.293231	0.530518	0.110283	0.162186	5.3e-09	1.44e-09	6.62e-09	6.43e-10
k__Fungi;p__Basidiomycota;c__Agaricomycetes;__;__;__	0.0144201	0.0139019	0.0856569	0.0109632	0.110795	0.0347369	0.00433	0.103215	0.107611	0.117492	6.79e-05	3.65e-05	3.25e-05	1.3e-05
k__Fungi;p__Ascomycota;c__Sordariomycetes;__;__;__	0.0677411	0.00436	0.0120455	0.174193	0.0260693	0.0470064	0.0716995	0.0844148	0.100933	0.0753982	1.12e-05	5.21e-06	7.81e-05	3.42e-05
k__Fungi;p__Basidiomycota;c__Agaricomycetes;o__Cantharellales;f__Ceratobasidiaceae;g__Thanatephorus	0.0845087	0.00233	0.000892	0.0105203	0.0547456	0.0229455	0.211005	0.0926321	0.10017	0.064627	0.0434733	0.0350276	0.0406416	0.0320962
k__Fungi;p__Ascomycota;c__Leotiomycetes;o__Helotiales;f__Myxotrichaceae;g__Oidiodendron	0.012408	0.000507	0.0156145	0.18416	0.00782	0.00669	0.0048	0.00623	0.091775	0.0282279	0.000741434	0.00044631	0.000156275	7.38e-05
k__Metazoa;p__Platyhelminthes;c__Trematoda;o__Plagiorchiida;f__Heterophyidae;g__Tetracladium	0.179078	0.025267	0.0472898	0.943058	0.194217	0.0626221	0.00585	0.207551	0.0910118	0.0550939	0.00652674	0.00460522	0.00573552	0.00375951
k__Fungi;p__Basidiomycota;c__Tremellomycetes;o__Tremellales;f__Rhynchogastremataceae;g__Papiliotrema	0.106307	0.117912	0.0437207	0.373414	0.0925461	0.115205	0.209952	0.180782	0.0856694	0.0749029	0.00163918	0.00112122	2.03e-05	7.81e-06
k__Fungi;p__Basidiomycota;c__Tremellomycetes;o__Filobasidiales;f__Piskurozymaceae;g__Piskurozyma	0.234411	0.456632	0.0798572	0.221922	0.0795115	0.158228	0.0711147	0.0306284	0.0814718	0.0467989	2.19e-06	1.09e-06	9.65e-07	2.54e-07
k__Fungi;p__Ascomycota;c__Sordariomycetes;o__Glomerellales;f__Plectosphaerellaceae;g__Acrostalagmus	0.126428	0.0117709	0.00446	0.0438528	0.0482283	0.000319	0.115444	1.06539	0.080327	0.000867	5.17e-14	6.98e-15	2.34e-11	8.11e-14
k__Fungi;p__Ascomycota;c__Leotiomycetes;o__Helotiales;f__Hyaloscyphaceae;g__Arachnopeziza	0.788413	0.0208021	0.00937	0.0934642	0.107536	0.529659	0.198606	0.0245276	0.0786098	0.0209233	5.3e-08	1.72e-08	1.26e-08	1.39e-09
k__Fungi;p__Basidiomycota;c__Agaricomycetes;o__Agaricales;f__Psathyrellaceae;g__Coprinopsis	0.0382301	0.00071	0	0.20509	0.0332384	0.0384018	0.0247966	0.120895	0.0723133	0.178281	1.09e-08	3.14e-09	1.71e-06	4.97e-07
k__Fungi;p__Ascomycota;c__Dothideomycetes;o__Pleosporales;__;__	0.0157616	0.902406	0.096364	0.2052	0.221589	0.0438195	0.0391833	0.0885235	0.0688789	0.166767	0.000112523	6.14e-05	0.000580433	0.000305012
k__Fungi;p__Basidiomycota;c__Tremellomycetes;o__Filobasidiales;f__Filobasidiaceae;g__Filobasidium	0.227369	0.606711	0.123132	0.113508	0.0384523	0.0608693	0.128895	0.0545334	0.0686881	0.0532368	5.27e-05	2.87e-05	1.39e-05	5e-06
k__Fungi;p__Basidiomycota;c__Microbotryomycetes;o__Sporidiobolales;f__Sporidiobolaceae;g__Rhodotorula	0.115026	0.129785	0.0294446	0.0810613	0.0482283	0.066287	0.0508798	0.256481	0.0677341	0.122321	0.000134646	7.46e-05	2.72e-05	1.08e-05
k__Fungi;p__Mortierellomycota;c__Mortierellomycetes;o__Mortierellales;f__Mortierellaceae;g__Linnemannia	0.0503028	0.0146122	0.0383672	0.622135	0.0905909	0.210812	0.117082	0.290969	0.0625825	0.0995404	1.71e-08	5.53e-09	1.08e-08	1.17e-09
k__Fungi;p__Ascomycota;c__Sordariomycetes;o__Ophiostomatales;f__Ophiostomataceae;g__Hawksworthiomyces	0.170023	0.287171	1.84341	0.205865	0.0860288	0.155201	0.148545	0.113051	0.0608653	0.192271	8.22e-05	4.23e-05	7.4e-05	3.15e-05
k__Fungi;p__Basidiomycota;c__Tremellomycetes;o__Cystofilobasidiales;f__Mrakiaceae;g__Mrakia	0.223345	0.113245	0.00669	0.0250271	0.00782	0.00542	0.00889	0.0141936	0.0606745	0.03838	0.00025775	0.000176916	9.58e-07	2.6e-07
k__Fungi;p__Ascomycota;c__Sordariomycetes;o__Hypocreales;f__Bionectriaceae;g__Clonostachys	0.0680765	0.0315583	0.261878	0.120263	0.0912427	0.0325061	0.187378	0.444111	0.0597205	0.088274	3.7e-06	1.64e-06	1.68e-06	4.75e-07
k__Fungi;p__Ascomycota;c__Dothideomycetes;o__Venturiales;f__Sympoventuriaceae;g__Pseudosigmoidea	0.0298463	0.158806	0.0472898	0.278399	0.019552	0.0552923	0.0257323	0.0586421	0.0570493	0.0403609	1.24e-05	5.95e-06	1.68e-06	4.95e-07
k__Fungi;p__Ascomycota;c__Laboulbeniomycetes;o__Pyxidiophorales;f__unidentified;g__unidentified	0	0	0	0	0	0	0.00304	0.034239	0.0568585	0.211709	2.7e-06	1.18e-06	2.21e-05	9.81e-06
k__Fungi;p__Basidiomycota;c__Microbotryomycetes;o__Leucosporidiales;f__Leucosporidiaceae;g__Leucosporidium	0.467145	0.399705	0.00848	0.285486	0.0228107	0.0117914	0.0862032	0.0061	0.0560953	0.0148568	2.73e-08	8.55e-09	1.03e-08	1.12e-09
k__Fungi;p__Ascomycota;c__Dothideomycetes;o__Tubeufiales;f__Tubeufiaceae;g__Neohelicosporium	0.0737775	0.0260787	0.00803	0.122035	0.28937	0.141497	0.0173108	0.0623773	0.0541873	0.0545987	1.25e-05	7.07e-06	2.7e-05	1.06e-05
k__Fungi;p__Basidiomycota;c__Agaricomycetes;o__Sebacinales;f__unidentified;g__unidentified	0.270294	0.134453	0.0753959	0.407189	0.617843	0.207944	0.186559	0.104709	0.0522793	0.119845	0.000406665	0.000235775	0.00620981	0.00406031
k__Fungi;p__Ascomycota;c__Sordariomycetes;o__Pseudodactylariales;f__Pseudodactylariaceae;g__Pseudodactylaria	0.0888683	0.00781	0.010261	0.134659	0.0423627	0.22579	0.161763	0.181529	0.0520885	0.0219138	6.91e-08	2.23e-08	5.01e-08	7.61e-09
k__Fungi;p__Ascomycota;c__Leotiomycetes;o__Helotiales;f__Leotiaceae;g__Alatospora	0.053321	0	0	0.120817	0.00456	0.0140223	0.00175	0.000249	0.0492265	0.0106474	0.000235598	0.00013752	9.81e-05	4.7e-05
k__Fungi;p__Mortierellomycota;c__Mortierellomycetes;o__Mortierellales;f__Mortierellaceae;g__Podila	0.0325292	0.000609	0	0.0834976	0.00326	0.0180058	0.0552075	0.320851	0.0488449	0.0552177	2.8e-10	7.13e-11	2.87e-09	2.22e-10
k__Fungi;p__Ascomycota;c__Sordariomycetes;o__Glomerellales;f__Plectosphaerellaceae;g__Gibellulopsis	0.0620401	0.063624	0.096364	0.0544838	0.0136864	0.0100387	0.381891	1.32872	0.0477001	0.00409	6.27e-10	1.74e-10	5.26e-10	2.26e-11
k__Fungi;p__Basidiomycota;c__Agaricomycetes;o__Tremellodendropsidales;f__unidentified;g__unidentified	0.27633	0.000203	0.0660272	0.0180505	0.654992	0.0170498	0.00234	0.0301303	0.0477001	0.106102	8.07e-06	3.89e-06	5.1e-06	1.67e-06
k__Fungi;p__Ascomycota;c__Leotiomycetes;o__Thelebolales;f__Pseudeurotiaceae;g__unidentified	0.442665	0.0910219	0.19362	0.678501	0	0.0452536	0.0488913	0.0399663	0.0446473	0.426637	0.000141768	8.43e-05	0.00016225	7.63e-05
k__Fungi;p__Mucoromycota;c__Umbelopsidomycetes;o__Umbelopsidales;f__Umbelopsidaceae;g__Umbelopsis	0.00302	0.00101	0.00223	0.0125136	0	0.00351	0.00491	0.0514208	0.0421669	0.142254	1.02e-08	3.06e-09	3.02e-09	2.4e-10
k__Fungi;p__Ascomycota;c__Sordariomycetes;o__Microascales;f__Microascaceae;g__Petriella	0.113349	0.505644	1.19429	1.40229	0.464686	0.0817433	0.016843	0.238055	0.0412129	0.0654936	6.68e-24	7.85e-26	5.01e-11	5.31e-13
k__Fungi;p__Basidiomycota;c__Tremellomycetes;o__Cystofilobasidiales;f__Mrakiaceae;g__Itersonilia	0.0975875	0.671756	0.184698	0.182277	0.0130347	0.130662	0.0550905	0.0372272	0.0387325	0.0674745	1.69e-11	3.13e-12	1.22e-07	2.3e-08
k__Fungi;p__Ascomycota;c__Sordariomycetes;o__Hypocreales;f__Hypocreales_fam_Incertae_sedis;g__Acremonium	0.0794785	0.046272	0.00803	0.580607	0.0351936	0.0109947	0.0283055	0.211659	0.0379693	0.00644	3.56e-08	1.12e-08	9.93e-09	1.07e-09
k__Fungi;p__Basidiomycota;c__Microbotryomycetes;o__Sporidiobolales;f__Sporidiobolaceae;g__Sporidiobolus	0.0486261	0.101169	0.0593353	0.0829439	0.0762528	0.0519461	0.020118	0.228094	0.0372061	0.00285	3.07e-06	1.62e-06	7.38e-08	1.24e-08
k__Fungi;p__Mucoromycota;c__Umbelopsidomycetes;__;__;__	0	0.00934	0	0.0207083	0.0423627	0.000637	0.0014	0.0146917	0.0351073	0.00421	5.72e-05	3.34e-05	3.13e-06	1.06e-06
k__Fungi;p__Ascomycota;c__Lecanoromycetes;o__Ostropales;f__unidentified;g__unidentified	0.0808199	0	0.000892	0.0746384	0.0136864	0.00112	0.00129	0.0582686	0.0347257	0.0347896	7.52e-07	3.06e-07	7.72e-07	2.13e-07
k__Fungi;p__Basidiomycota;c__Cystobasidiomycetes;o__Cystobasidiales;f__Cystobasidiaceae;g__Occultifur	0.040913	0.0072	0.00357	0.0833869	0.0117312	0.0348963	0.0356743	0.0876519	0.0326269	0.038999	4.89e-07	2.07e-07	1.51e-07	3.11e-08
k__Fungi;p__Basidiomycota;c__Agaricomycetes;o__Auriculariales;f__Auriculariaceae;g__unidentified	0.0134141	0	0	0.0407521	1.05841	0.0736168	0.00105	0.00573	0.0318637	0.000743	0.000389265	0.000243117	0.00489737	0.00334462
k__Fungi;p__Basidiomycota;c__Microbotryomycetes;o__Sporidiobolales;f__Sporidiobolaceae;g__Sporobolomyces	0.128105	0.584894	0.24091	0.0912494	0.2066	0.0321874	0.0502949	0.0317489	0.0316729	0.00743	5.53e-07	2.11e-07	3.42e-07	7.66e-08
k__Fungi;p__Ascomycota;c__Eurotiomycetes;o__Chaetothyriales;f__Herpotrichiellaceae;g__Thysanorea	0	0.000304	0	0.0295675	0.00456	0	0	0.102593	0.0314821	0.0965691	4.48e-05	2.72e-05	1.63e-06	5.03e-07
k__Fungi;p__Basidiomycota;c__Tremellomycetes;o__Trichosporonales;f__Trichosporonaceae;g__Cutaneotrichosporon	0.00302	0.000203	0.00268	0.00365	0	0.00319	0.000468	0.00149	0.0299557	0.0167139	4.83e-05	2.57e-05	1.85e-05	7.23e-06
k__Fungi;p__Ascomycota;c__Sordariomycetes;o__Sordariales;f__Chaetomiaceae;g__Arcopilus	0.0355473	0.00984	0.02766	0.036544	0.00391	0.00606	0.00971	0.340149	0.0297649	0.197719	7.46e-08	2.97e-08	2.58e-08	3.55e-09
k__Fungi;p__Basidiomycota;c__Microbotryomycetes;o__Kriegeriales;f__unidentified;g__unidentified	0.00134	0.000406	0	0.00554	0	0.00717	0.0196501	0	0.0280477	0.00929	0.0344706	0.0282548	0.0286538	0.0225953
k__Fungi;p__Basidiomycota;c__Cystobasidiomycetes;o__Cystobasidiales;f__Cystobasidiaceae;g__Cystobasidium	0.0724361	0.0326745	0.02766	0.115058	0.00521	0.0173685	0.0140358	0.0104585	0.0278569	0.0127521	0.000433523	0.000303813	4.46e-06	1.46e-06
k__Fungi;p__Ascomycota;c__Dothideomycetes;o__Dothideales;f__Saccotheciaceae;g__Aureobasidium	0.0469493	0.295187	0.0629043	0.166663	0.0371488	0.0226268	0.0293582	0.045818	0.0274753	0.0225328	4.47e-05	2.62e-05	1.43e-05	5.14e-06
k__Fungi;p__Ascomycota;c__Dothideomycetes;o__Pleosporales;f__Torulaceae;g__Dendryphion	0.00168	0.0326745	0.00402	0.0168324	0.00847	0.00143	0.0173108	0.0310019	0.0255672	0.00916	0.0203816	0.0164139	0.00652582	0.00443983
k__Fungi;p__Ascomycota;c__Leotiomycetes;o__Helotiales;f__Helotiaceae;g__Crocicreas	0	0	0	0.00299	0	0	0	0.00847	0.0253764	0	0.0205566	0.0165184	0.0110928	0.00835336
k__Fungi;p__Ascomycota;c__Sordariomycetes;o__Chaetosphaeriales;f__Chaetosphaeriaceae;g__Chloridium	0.0164323	0.00101	0.00223	0.0337756	0.00717	0.0124288	0.0145037	0.0250256	0.0244224	0.103378	1.11e-06	4.78e-07	3.35e-07	7.73e-08
k__Fungi;p__Ascomycota;c__Sordariomycetes;o__Hypocreales;f__Nectriaceae;g__Cylindrodendrum	0.0298463	0.000203	0	0.168435	0	0.166514	0.565409	0.00112	0.0242316	0.0181996	1.62e-08	5.35e-09	4.18e-08	6.77e-09
k__Fungi;p__Basidiomycota;c__GS27;o__unidentified;f__unidentified;g__unidentified	0.0855148	0	0	0.0626786	0.0136864	0.056089	0.0121644	0.0245276	0.0234684	0.00607	6.71e-05	3.58e-05	2.17e-05	8.62e-06
k__Fungi;p__Ascomycota;c__Dothideomycetes;o__Pleosporales;f__Pleosporales_fam_Incertae_sedis;g__Pteridiospora	0.0184444	0.0146122	0.0401517	0.0179398	0.0482283	0.0130662	0.0236269	0.0311264	0.0223236	0.0167139	0.0040991	0.00292772	0.0045459	0.00304777
k__Fungi;p__Basidiomycota;c__Agaricomycetes;o__Sebacinales;f__Serendipitaceae;g__unidentified	0.107983	0.0273979	0	0.0031	0.0123829	0.00207	0.0878407	0.000747	0.021942	0.00384	0.00324308	0.00218596	0.00228939	0.00140927
k__Fungi;p__Basidiomycota;c__Microbotryomycetes;o__Microbotryomycetes_ord_Incertae_sedis;f__Chrysozymaceae;g__Slooffia	0.0912158	0.0280067	0.00223	0.0419703	0.0130347	0.115684	0.0607048	0.0423319	0.0215604	0.0242661	0.000390633	0.000239512	0.000938322	0.000562707
k__Fungi;p__Ascomycota;c__Sordariomycetes;o__Sordariales;f__Chaetomiaceae;g__Zopfiella	0.169353	0.0268905	0.00402	0.033997	0.153809	0.015775	0.10176	0.0735828	0.0213696	0.20589	3.58e-05	2.06e-05	7.85e-07	2.03e-07
k__Fungi;p__Ascomycota;c__Orbiliomycetes;o__Orbiliales;f__Orbiliaceae;g__Dactylellina	0.00369	0.148355	0	0.0219264	0.0808149	0.0442976	0.0173108	0.0261462	0.0207972	0.0122568	7.34e-06	3.58e-06	3.93e-07	9.05e-08
k__Fungi;p__Ascomycota;c__Dothideomycetes;o__Pleosporales;f__Pleosporales_fam_Incertae_sedis;g__Aaosphaeria	0.00402	0	0	0.00133	0	0	0.000702	0.0470631	0.0198432	0.00173	3.55e-05	2.11e-05	5.75e-06	1.98e-06
k__Fungi;p__Ascomycota;c__Dothideomycetes;o__Tubeufiales;f__Tubeufiaceae;g__Helicosporium	0.00402	0.0108577	0	0.00288	0.00326	0.00127	0.00175	0.0176798	0.0198432	0.0173329	0.00576538	0.00426703	0.000928636	0.000528835
k__Fungi;p__Ascomycota;c__Leotiomycetes;o__Helotiales;f__Dermateaceae;g__Coleophoma	0.0194504	0.0420101	0.0397056	0.00941	0.0234624	0.0390392	0.0453824	0.0145672	0.0198432	0.0404847	0.000273806	0.000155817	5.87e-05	2.51e-05
k__Fungi;p__Ascomycota;c__Saccharomycetes;o__Saccharomycetales;f__Debaryomycetaceae;g__Debaryomyces	0.0127434	0.00487	0.00134	0.00299	0	0.000319	0.0083	0.000996	0.0192708	0.00867	0.0340696	0.0286866	0.00946753	0.00689733
k__Fungi;p__Ascomycota;c__Dothideomycetes;o__Pleosporales;f__Phaeosphaeriaceae;g__Neosetophoma	0.00738	0.159111	0.0356904	0.0183828	0.0013	0.00112	0.0614066	0.0161857	0.0185076	0.0120092	0.0021709	0.00168367	0.000312297	0.000159974
k__Fungi;p__Ascomycota;c__Leotiomycetes;o__Helotiales;f__Calloriaceae;g__Polyphilus	0.00905	0.000609	0	0.0252486	0	0.00637	0.00386	0.0305039	0.0183168	0.0314469	7.94e-07	3.27e-07	8.41e-08	1.59e-08
k__Fungi;p__Ascomycota;c__Sordariomycetes;o__Atractosporales;f__Conlariaceae;g__Conlarium	0.157616	0.00203	0	0.0774069	0.0371488	0.010676	0.00877	0.0808041	0.018126	0.0186948	3.48e-05	1.95e-05	9.44e-06	3.35e-06
k__Fungi;p__Ascomycota;c__Leotiomycetes;o__Helotiales;f__Tympanidaceae;__	0.0248161	0.0066	0.0111532	0.00808	0	0.00494	0.000351	0.00137	0.018126	0.00111	0.0113944	0.0085121	0.0035509	0.00238207
k__Fungi;p__Ascomycota;c__Saccharomycetes;o__Saccharomycetales;f__Debaryomycetaceae;g__Schwanniomyces	0	0.0216139	0.000892	0.0177183	0.0423627	0.00127	0.00456	0.0612567	0.0179352	0.0340468	4.67e-06	2.28e-06	5.11e-07	1.27e-07
k__Fungi;p__Basidiomycota;c__Agaricomycetes;o__Auriculariales;f__Auriculariales_fam_Incertae_sedis;g__Renatobasidium	0.0492968	0	0	0.103763	0	0	0.00491	0.000374	0.0177444	0.0502654	0.0130317	0.0106902	0.00705407	0.00507883
k__Fungi;p__Ascomycota;c__Leotiomycetes;o__Helotiales;f__Hyaloscyphaceae;g__Hyphodiscus	0	0.000304	0	0	0	0	0.00491	0.0150652	0.0175536	0.143863	0.000862523	0.000562261	0.00121531	0.000746521
k__Fungi;p__Ascomycota;c__Saccharomycetes;o__Saccharomycetales;f__unidentified;g__unidentified	0.0969168	0.00994	0.0388133	0.675511	0.0104277	0.00892	0.00363	0.0460671	0.017172	0.00532	2.12e-06	1.05e-06	5.39e-08	8.52e-09
k__Fungi;p__Basidiomycota;c__Microbotryomycetes;__;__;__	0.0811552	0.122276	0.0330136	0.0373192	0.0117312	0.0114728	0.00807	0.00984	0.0167904	0.00693	0.00148242	0.000936149	0.000848412	0.00047363
k__Fungi;p__Basidiomycota;c__Agaricomycetes;o__Cantharellales;f__Ceratobasidiaceae;__	0.0382301	0.150993	0.22128	0.00399	0.435358	0.0414294	0.542951	0.11193	0.0127836	0.379095	0.00725248	0.00540241	0.00757022	0.00517878
k__Fungi;p__Basidiomycota;c__Microbotryomycetes;o__Microbotryomycetes_ord_Incertae_sedis;f__Colacogloeaceae;g__Colacogloea	0.0687472	0.0627107	0.0165068	0.0170539	0.0182485	0.0245389	0.0536869	0.00759	0.0125928	0.00508	0.0094707	0.00728913	0.0007201	0.000398016
k__Fungi;p__Mucoromycota;c__Umbelopsidomycetes;o__GS23;f__unidentified;g__unidentified	0.000671	0.000812	0	0.0140639	0	0.00112	0	0.00759	0.0125928	0.000248	0.0657355	0.0565495	0.0422272	0.034562
k__Fungi;p__Glomeromycota;c__Glomeromycetes;o__Glomerales;f__Glomeraceae;g__Rhizoglomus	0.00201	0.00254	0.0200758	0.0591349	0.029328	0.178306	0.0189483	0.0222865	0.012402	0.0820837	0.000373117	0.000215461	0.000650523	0.000351825
k__Fungi;p__Glomeromycota;c__Glomeromycetes;o__Glomerales;f__Glomeraceae;g__Rhizophagus	0.0516442	0.00071	0.000892	0.160794	1.18876	0.0986338	0.0162581	0.0119525	0.0122112	0.300478	3.19e-05	1.63e-05	6.12e-05	2.69e-05
k__Fungi;p__Basidiomycota;c__Tremellomycetes;__;__;__	0.0100606	0	0	0.0214835	0.00391	0.0262917	0.00526	0.00548	0.0120204	0.00235	0.000302413	0.000181005	2.7e-05	1.13e-05
k__Fungi;p__Basidiomycota;c__Agaricomycetes;o__Agaricales;f__Tricholomataceae;g__Flagelloscypha	0.664333	0	0	0.060353	0.0117312	0.145481	0.049944	0.0522923	0.011448	0.274231	6.92e-08	2.52e-08	8.94e-08	1.56e-08
k__Fungi;p__Ascomycota;c__Dothideomycetes;__;__;__	0.115361	0.102387	0.00446	0.0632323	0.422323	0.0532208	0.016609	0.012077	0.0112572	0.00545	9.13e-06	4.77e-06	8.25e-07	2.12e-07
k__Fungi;p__Ascomycota;c__Sordariomycetes;o__Sordariales;f__Chaetomiaceae;__	0.0710947	0.0606813	0.0513049	0.119488	0.0619147	0.0487592	0.00819	0.177669	0.0106848	0.0576938	0.000125691	7.21e-05	4.68e-05	1.93e-05
k__Fungi;p__Basidiomycota;c__Cystobasidiomycetes;o__Cystobasidiomycetes_ord_Incertae_sedis;f__Symmetrosporaceae;g__Symmetrospora	0.0167676	0.0217154	0.0245371	0.0353259	0	0.00669	0.0363761	0.00535	0.0101124	0.0253803	0.000576453	0.000371442	3.38e-06	1.14e-06
k__Fungi;p__Ascomycota;c__Dothideomycetes;o__Pleosporales;f__Phaeosphaeriaceae;g__Pseudoophiobolus	0	0.00183	0.00223	0	0	0.00143	0	0.0184268	0.00973	0	0.0386406	0.0327875	0.0189386	0.0146012
k__Fungi;p__Ascomycota;c__Saccharomycetes;o__Saccharomycetales;f__Phaffomycetaceae;g__Barnettozyma	0	0	0	0	0	0.000319	0.00129	0.00735	0.00916	0.0047	0.0119443	0.00923673	0.00327053	0.00219513
k__Fungi;p__Basidiomycota;c__Tremellomycetes;o__Filobasidiales;f__Piskurozymaceae;g__unidentified	0.0110666	0.000507	0.00312	0.0152821	0	0.00335	0.00175	0.00423	0.00897	0.000743	0.053883	0.0461024	0.0240681	0.0185322
k__Fungi;p__Basidiomycota;c__Agaricomycetes;o__Hymenochaetales;f__unidentified;g__unidentified	0.319926	0.000101	0	0.0722022	0.00391	0	0	0.105207	0.00859	0.532987	6.04e-09	1.69e-09	2.71e-07	6.05e-08
k__Fungi;p__Basidiomycota;c__Agaricomycetes;o__Atheliales;f__Atheliaceae;g__Athelia	1.39305	0.00599	0.308722	0.0691015	0.215724	0	0.00316	0	0.0082	0	5.62e-11	1.23e-11	3.42e-09	3.07e-10
k__Fungi;p__Basidiomycota;c__Agaricomycetes;o__Cantharellales;f__Ceratobasidiaceae;g__Ceratobasidium	0.030517	0	0.00223	0.0738633	0.0319349	0.369677	0.0649155	0.879881	0.00782	0.137301	5.57e-05	3.1e-05	9.3e-05	4.29e-05
k__Fungi;p__Basidiomycota;c__Microbotryomycetes;o__Microbotryomycetes_ord_Incertae_sedis;f__Microbotryomycetes_fam_Incertae_sedis;g__Curvibasidium	0.0694179	0.0960956	0.0191836	0.0125136	0.0013	0.00398	0.0581316	0.00722	0.00782	0.00334	1.76e-05	8.93e-06	1.39e-06	4.01e-07
k__Fungi;p__Basidiomycota;c__Tremellomycetes;o__Cystofilobasidiales;f__Mrakiaceae;g__Tausonia	0.0405776	0.1997	0.00669	0.0591349	0.0013	0.543681	0.023276	0.00174	0.00744	0.0235232	6.11e-06	2.78e-06	1.15e-05	4.15e-06
k__Fungi;p__Ascomycota;c__Orbiliomycetes;o__Orbiliales;f__Orbiliaceae;g__Monacrosporium	0.00235	0.000406	0.0111532	0.0606853	0.0671285	0.0159344	0.00164	0.0479346	0.00725	0.0106474	0.00061824	0.00036937	0.000329693	0.000171529
k__Fungi;p__Ascomycota;c__Sordariomycetes;o__Hypocreales;f__Nectriaceae;g__Volutella	0.059022	0	0.00669	0.0176076	0.0228107	0.0051	0.0764951	0.055903	0.00649	0.0073	0.0040787	0.00282775	0.00126092	0.000736088
k__Fungi;p__Basidiomycota;c__Agaricomycetes;o__Agaricales;f__Agaricales_fam_Incertae_sedis;g__Disporotrichum	0.011402	0.0939646	0.0771805	0.146508	0.0143381	0.00685	0.00222	0.00847	0.00649	0.00396	4.85e-05	2.6e-05	8.34e-07	2.16e-07
k__Fungi;p__Ascomycota;c__Sordariomycetes;o__Sordariales;f__Lasiosphaeriaceae;g__Cercophora	0.00101	0.00142	0	0.0041	0.00456	0.00207	0.0270189	0.00598	0.00649	0.00631	0.037366	0.0310904	0.0324574	0.0254643
k__Fungi;p__Ascomycota;c__Dothideomycetes;o__Pleosporales;f__Didymosphaeriaceae;g__Paraphaeosphaeria	0.000671	0.191988	0	0.0104095	0.00391	0	0.016843	0.00212	0.00649	0.0052	0.0070515	0.00520207	0.00251071	0.0016062
k__Fungi;p__Ascomycota;c__Sordariomycetes;o__Sordariales;f__Chaetomiaceae;g__Chaetomidium	0.152585	0.00203	0	0.195123	0.0254176	0.00382	0.000468	0.0359821	0.00611	0.0739125	7.91e-11	1.84e-11	4.47e-10	1.82e-11
k__Fungi;p__Basidiomycota;c__Agaricomycetes;o__Agaricales;f__Strophariaceae;g__Kuehneromyces	0.139507	0	0	0.0509402	0.0013	0.0490779	0.000585	0.00174	0.00611	0.0133711	4.59e-06	2.11e-06	4.63e-06	1.55e-06
k__Fungi;p__Ascomycota;c__Dothideomycetes;o__Tubeufiales;f__Tubeufiaceae;g__Acanthostigma	0	0.0103503	0	0.0188257	0.0117312	0.00143	0.000936	0.0316244	0.00591	0.0099	0.00931529	0.00708609	0.00139518	0.000835378
k__Fungi;p__Rozellomycota;c__Rozellomycotina_cls_Incertae_sedis;o__GS05;f__unidentified;g__unidentified	0.00537	0	0	0.000554	0	0.00271	0.000819	0.0164347	0.00572	0.00607	0.00414133	0.00292966	0.000828879	0.000492554
k__Fungi;p__Basidiomycota;c__Agaricomycetes;o__Cantharellales;f__Ceratobasidiaceae;g__Rhizoctonia	0.0875269	0.106649	0	0	0.323911	0.00813	0	0	0.00496	0	0.000595715	0.000390462	0.00287067	0.00199918
k__Fungi;p__Ascomycota;c__Taphrinomycetes;o__Taphrinales;f__Taphrinaceae;g__Taphrina	0.00168	0.000406	0.00491	0.00975	0.00261	0.000637	0.00257	0.00125	0.00477	0.00644	0.035857	0.0295878	0.0169653	0.0129938
k__Fungi;p__Ascomycota;c__Sordariomycetes;o__Xylariales;f__Nothodactylariaceae;g__Nothodactylaria	0	0.0165402	0	0.00997	0.0013	0.0086	0	0	0.00439	0	0.0617726	0.0524274	0.0313493	0.0250784
k__Fungi;p__Ascomycota;c__Leotiomycetes;o__Helotiales;f__Helotiaceae;g__Infundichalara	0.166335	0.102082	0.616997	0.0594671	0.039104	0.0337809	0.00363	0.00971	0.00401	0.00334	2.29e-09	6.38e-10	5.17e-09	4.58e-10
k__Fungi;p__Basidiomycota;c__Tremellomycetes;o__Tremellales;f__Tremellaceae;g__Tremella	0.0211272	0.0605798	0	0.00952	0.00652	0.0141816	0.0192992	0.00461	0.00401	0.00136	0.00289681	0.00219281	0.000102855	4.86e-05
k__Fungi;p__Ascomycota;c__Sordariomycetes;o__Sordariales;__;__	0.00436	0	0	0.0191579	0.0664768	0.0242203	0.0320484	0.0245276	0.00382	0.00359	0.0139478	0.0106443	0.0103406	0.00747184
k__Fungi;p__Basidiomycota;c__Agaricomycetes;o__Polyporales;f__unidentified;g__unidentified	0.00402	0.00244	0	0.00421	0.0234624	0	0	0.00125	0.00382	0	0.00344031	0.00234911	0.00125352	0.000738902
k__Fungi;p__Ascomycota;c__Sordariomycetes;o__Glomerellales;f__Plectosphaerellaceae;g__Plectosphaerella	0.0385655	0.164387	0.0281062	0.0380944	0.00652	0.0460503	0.0555583	0.0449465	0.00363	0.0411038	1.02e-07	3.84e-08	2.42e-07	5.06e-08
k__Fungi;p__Ascomycota;c__Sordariomycetes;o__Chaetosphaeriales;f__Chaetosphaeriaceae;g__Chaetosphaeria	0	0.0362261	0.223957	0.00199	0	0	0	0	0.00363	0.0162187	9.72e-06	5.2e-06	0.000199433	0.000105094
k__Fungi;p__Basidiomycota;c__Microbotryomycetes;o__Microbotryomycetes_ord_Incertae_sedis;f__Chrysozymaceae;g__Hamamotoa	0.0496321	0.0399806	0.00937	0.00819	0.00652	0.0111541	0.00678	0.00149	0.00305	0.000619	0.00283853	0.00196975	0.000623171	0.000345341
k__Fungi;p__Ascomycota;c__Leotiomycetes;o__Helotiales;f__Dermateaceae;g__Pyrenopeziza	0	0.0849335	0.203881	0.0102988	0.0215072	0.076485	0.00456	0.000996	0.00305	0.0132473	1.25e-07	4.3e-08	1.52e-06	4.52e-07
k__Fungi;p__Ascomycota;c__Dothideomycetes;o__Tubeufiales;f__Tubeufiaceae;g__unidentified	0	0.00355	0	0.0356581	0.0156416	0.00112	0	0.00759	0.00286	0.0021	0.00507693	0.00364047	0.000889331	0.000520527
k__Fungi;p__Mortierellomycota;c__Mortierellomycetes;o__Mortierellales;f__Mortierellaceae;g__Gryganskiella	0.0288403	0.00325	0.00178	0.0303426	0.00261	0.0689958	0.000234	0.00349	0.00286	0.0105236	2.29e-05	1.2e-05	2.64e-06	8.17e-07
k__Fungi;p__Basidiomycota;c__Cystobasidiomycetes;o__Sakaguchiales;f__Sakaguchiaceae;g__Sakaguchia	0.00436	0.0105533	0.00134	0.0105203	0	0.00175	0.000351	0.00722	0.00267	0.000743	0.0203023	0.0164641	0.00772429	0.00558127
k__Fungi;p__Ascomycota;c__Sordariomycetes;o__Hypocreales;f__Hypocreaceae;g__Kiflimonium	0.27566	0.00173	0.01383	0.0407521	0.0013	0.00366	0.230889	0.01133	0.00248	0.00322	0.000384607	0.000258557	2.7e-05	1.08e-05
k__Fungi;p__Ascomycota;c__Sordariomycetes;o__Sordariales;f__Helminthosphaeriaceae;g__Spadicoides	0.00201	0.0422131	0	0.000664	0.14664	0	0	0	0.00248	0	1.59e-07	5.98e-08	5.69e-06	2.01e-06
k__Fungi;p__Basidiomycota;c__Cystobasidiomycetes;__;__;__	0.00235	0.00203	0.00134	0.00177	0.0234624	0.00303	0.00211	0.000249	0.00229	0	0.0358293	0.0298461	0.0184348	0.0144298
k__Fungi;p__Basidiomycota;c__Agaricomycetes;o__Agaricales;f__Psathyrellaceae;g__Candolleomyces	0.00503	0	0	0.0914708	0.0123829	0.031072	0	0.00224	0.0021	0.279431	0.00604575	0.00471844	0.0114099	0.00816426
k__Fungi;p__Basidiomycota;c__Microbotryomycetes;o__Sporidiobolales;f__Sporidiobolaceae;g__unidentified	0.0499675	0.0133945	0	0.0021	0	0.000319	0.0128661	0.00187	0.0021	0.00149	0.0560643	0.0489723	0.0376598	0.0307049
k__Fungi;p__Ascomycota;c__Sordariomycetes;o__Hypocreales;f__Nectriaceae;g__Calonectria	0.00268	0.0142063	0	0.016168	0	0.0117914	0.0382475	0.0713417	0.00191	0.022409	9.94e-05	5.48e-05	3.91e-05	1.69e-05
k__Fungi;p__Ascomycota;c__Taphrinomycetes;o__Taphrinales;f__Protomycetaceae;g__Protomyces	0.0134141	0.00457	0.00981	0.0162787	0.00326	0	0.00257	0.00237	0.00191	0.00446	0.066728	0.057321	0.0382533	0.0309408
k__Fungi;p__Ascomycota;c__Dothideomycetes;o__Mycosphaerellales;f__Mycosphaerellaceae;g__Ramularia	0.0177737	0.0221213	0.0115994	0.0031	0	0.00239	0.0147376	0.000996	0.00191	0.00186	0.00099169	0.000654052	8.19e-05	3.85e-05
k__Fungi;p__Ascomycota;c__Sordariomycetes;o__Hypocreales;f__Ophiocordycipitaceae;g__Drechmeria	0.0100606	0	0	0.0159465	0.0013	0.00351	0.00409	0.0197964	0.00172	0.0297136	0.00226035	0.00163299	0.000398483	0.000222877
k__Fungi;p__Ascomycota;c__Sordariomycetes;o__Diaporthales;f__Diaporthaceae;g__Diaporthe	0.00201	0.0107562	0.00134	0.0595779	0	0	0.0105268	0.00286	0.00172	0	0.0843948	0.072662	0.0470957	0.038421
k__Fungi;p__Basidiomycota;c__Microbotryomycetes;o__Sporidiobolales;f__Sporidiobolaceae;g__Rhodosporidiobolus	0.0274989	0.0555061	0.000892	0.00487	0	0	0.00328	0.000996	0.00172	0.000248	0.0161006	0.0130005	0.013945	0.0104273
k__Fungi;p__Basidiomycota;c__Tremellomycetes;o__Cystofilobasidiales;f__Mrakiaceae;g__Krasilnikovozyma	0.0254868	0.00538	0.00981	0.00144	0	0	0	0.000747	0.00172	0.000619	0.0179103	0.0143943	0.0121304	0.00930172
k__Fungi;p__Ascomycota;c__Leotiomycetes;o__Helotiales;f__Hyaloscyphaceae;g__Lachnum	0	0	0	0	0	0	0	0	0.00172	0.023028	0.00147971	0.00105677	0.00155483	0.000966158
k__Fungi;p__Ascomycota;c__Sordariomycetes;o__Sordariales;f__Sordariaceae;__	0.00168	0	0	0.00111	0	0.0180058	0	0.305288	0.00134	0.151539	5.15e-12	8.49e-13	4.51e-08	7.08e-09
k__Fungi;p__Basidiomycota;c__Agaricomycetes;o__unidentified;f__unidentified;g__unidentified	0.00436	0	0	0.0109632	0	0.00494	0.0695941	0.0192984	0.00134	0.00978	0.0559824	0.0476205	0.0164193	0.0123833
k__Fungi;p__Basidiomycota;c__Cystobasidiomycetes;o__Cystobasidiomycetes_ord_Incertae_sedis;f__Microsporomycetaceae;g__unidentified	0.000671	0	0	0.00498	0.0013	0.0108354	0.000351	0.00635	0.00134	0.000495	0.0230121	0.0191425	0.00681573	0.0048408
k__Fungi;p__Ascomycota;c__Sordariomycetes;o__Sordariomycetes_ord_Incertae_sedis;f__Sordariomycetes_fam_Incertae_sedis;g__Oncopodiella	0.0130787	0	0	0.00155	0	0.00207	0.00234	0.0343635	0.00114	0.015971	0.00363684	0.00253254	0.00227202	0.00144362
k__Fungi;p__Ascomycota;c__Saccharomycetes;o__Saccharomycetales;f__Pichiaceae;g__Pichia	0	0.0161343	0.00758	0.0176076	0.00652	0.00207	0	0.010334	0.00114	0.000495	0.0116388	0.00872783	0.00416559	0.00280871
k__Rhizaria;p__Cercozoa;c__unidentified;o__unidentified;f__unidentified;g__unidentified	0	0.000609	0	0.0021	0	0.00112	0.00573	0.00735	0.00114	0.00532	0.0742986	0.0640684	0.0320732	0.0256231
k__Fungi;p__Basidiomycota;c__Agaricomycetes;o__Agaricales;f__Psathyrellaceae;__	0.0271635	0.000304	0	0.22912	0.177271	0.0506713	0.000234	0.000498	0.00114	0.590928	1.54e-08	4.91e-09	4.44e-07	1.08e-07
k__Fungi;p__Basidiomycota;c__Tremellomycetes;o__Cystofilobasidiales;f__Mrakiaceae;g__Udeniomyces	0.0207918	0.0186712	0	0.00963	0	0.00287	0.00246	0.000498	0.00114	0.00099	0.00411256	0.00293879	0.000837718	0.00049002
k__Fungi;p__Ascomycota;c__Leotiomycetes;o__Helotiales;f__Helotiales_fam_Incertae_sedis;g__Chalara	0.00537	0.0101474	0.00714	0.00288	0.0312832	0	0.000936	0.000498	0.00114	0.000248	0.00271851	0.00191296	0.00117423	0.000702421
k__Fungi;p__Ascomycota;c__Eurotiomycetes;o__Chaetothyriales;f__Herpotrichiellaceae;g__Melanchlenus	0.0969168	0.0176564	0.0397056	0.0119599	0.0149899	0.020874	0.0361422	0.00448	0.000954	0.000248	3.67e-05	2e-05	9.54e-06	3.6e-06
k__Fungi;p__Ascomycota;c__Sordariomycetes;o__Sordariales;f__Podosporaceae;__	0.0057	0	0	0.000554	0.0123829	0.0043	0	0.000872	0.000954	0.0942168	0.000259053	0.000155671	0.000647004	0.000376354
k__Fungi;p__Ascomycota;c__Sordariomycetes;o__Glomerellales;f__Plectosphaerellaceae;g__Verticillium	0	0	0.0107071	0.000664	0.0013	0.000797	0.0636289	0.000747	0.000954	0.000495	0.017085	0.0137854	0.0212333	0.0165902
k__Fungi;p__Basidiomycota;c__Tremellomycetes;o__Cystofilobasidiales;f__unidentified;g__unidentified	0.00101	0.00244	0.00134	0.0052	0.0175968	0.0114728	0.00105	0	0.000954	0	0.00176892	0.00116435	0.000544902	0.000301502
k__Fungi;p__Ascomycota;c__Sordariomycetes;o__Hypocreales;f__Ophiocordycipitaceae;g__Tolypocladium	0	0	0	0	0	0	0.00152	0.0122015	0.000763	0	0.0229812	0.0191744	0.0126734	0.00964623
k__Fungi;p__Ascomycota;c__Sordariomycetes;o__Hypocreales;f__Clavicipitaceae;g__Metacordyceps	0	0	0	0.00775	0	0.000797	0	0.00486	0.000763	0	0.087606	0.0758976	0.0379423	0.0305457
k__Fungi;p__Basidiomycota;c__Exobasidiomycetes;o__Entylomatales;f__Entylomataceae;g__Tilletiopsis	0.0117373	0.00528	0.00535	0.00631	0	0.000956	0.00339	0.00411	0.000763	0.000743	0.0265125	0.0215494	0.00873507	0.00632384
k__Fungi;p__Basidiomycota;c__Cystobasidiomycetes;o__Cystobasidiomycetes_ord_Incertae_sedis;f__Microsporomycetaceae;g__Lichenozyma	0	0.0121768	0.00223	0.00377	0.0117312	0.00191	0.000234	0.000623	0.000763	0	0.010984	0.00856841	0.00404142	0.00281269
k__Fungi;p__Ascomycota;c__Sordariomycetes;o__Hypocreales;f__Ophiocordycipitaceae;g__Hirsutella	0.00235	0	0	0.00941	0	0.000478	0.000468	0.0205434	0.000572	0.00285	0.057828	0.0491462	0.0378014	0.0306155
k__Fungi;p__Ascomycota;c__Dothideomycetes;o__Tubeufiales;f__Tubeufiaceae;__	0	0	0	0.0145069	0.0013	0.000478	0	0.00884	0.000572	0	0.0720964	0.0608061	0.0396104	0.0319841
k__Fungi;p__Ascomycota;c__Sordariomycetes;o__Sordariales;f__Chaetomiaceae;g__Trichocladium	0.00537	0.00203	0	0.00465	0.0175968	0	0	0.00336	0.000572	0.000495	0.060469	0.0528087	0.0393196	0.032407
k__Fungi;p__Ascomycota;c__Saccharomycetes;o__Saccharomycetales;f__Trichomonascaceae;g__Sugiyamaella	0.00939	0.00873	0.0968102	0.0186042	0.141426	0.000956	0.000585	0.00187	0.000572	0.000248	3.43e-07	1.49e-07	2.2e-07	5.09e-08
k__Fungi;p__Ascomycota;c__Sordariomycetes;o__Microascales;f__Microascaceae;g__Parascedosporium	0	0.0423145	0.034352	0.000443	0	0	0.00222	0.0400908	0.000382	0.000371	2.33e-09	6.22e-10	5.57e-08	9e-09
k__Fungi;p__Ascomycota;c__Orbiliomycetes;o__Orbiliales;f__Orbiliaceae;g__Dactylaria	0.00335	0.0341966	0.00178	0.00277	0.00326	0.00382	0	0.021664	0.000382	0.00198	8.02e-05	4.41e-05	2.33e-05	9.25e-06
k__Fungi;p__Ascomycota;c__Dothideomycetes;o__Pleosporales;f__Nigrogranaceae;g__unidentified	0	0	0	0	0	0	0.000234	0.0200454	0.000382	0.000371	0.00161625	0.00110558	0.00101771	0.00060354
k__Fungi;p__Ascomycota;c__Dothideomycetes;o__Pleosporales;f__Torulaceae;g__Torula	0.00469	0.0691036	0.0236449	0.00487	0.0104277	0.00175	0.00234	0.00946	0.000382	0	0.000647012	0.000419913	0.00101093	0.000617098
k__Fungi;p__Ascomycota;c__Leotiomycetes;o__Thelebolales;f__Pseudeurotiaceae;g__Leuconeurospora	0.00134	0	0	0.00631	0	0.00223	0.0014	0.00697	0.000382	0.0225328	0.000719953	0.000462937	7.19e-05	3.32e-05
k__Fungi;p__Ascomycota;c__Dothideomycetes;o__Mycosphaerellales;f__Extremaceae;__	0.00168	0.00822	0.00268	0.00377	0	0	0.00269	0	0.000382	0.000619	0.0201658	0.0159574	0.0102743	0.00744055
k__Fungi;p__Ascomycota;c__Sordariomycetes;o__Microascales;f__Microascaceae;g__Scopulariopsis	0.012408	0.00183	0	0.00122	0	0	0.00152	0.0529149	0	0.010895	3.71e-06	1.64e-06	2.3e-06	6.98e-07
k__Fungi;p__Ascomycota;c__Sordariomycetes;o__Hypocreales;f__Nectriaceae;g__Stephanonectria	0	0	0	0	0	0	0	0.0463161	0	0	1.59e-05	7.67e-06	0.000189024	9.48e-05
k__Fungi;p__Ascomycota;c__Sordariomycetes;o__Hypocreales;f__Cordycipitaceae;__	0	0	0	0	0	0	0	0.0372272	0	0.000248	0.0139978	0.0111831	0.0143883	0.011232
k__Fungi;p__Basidiomycota;c__Geminibasidiomycetes;o__Geminibasidiales;f__Geminibasidiaceae;g__Geminibasidium	0.0160969	0.000203	0	0.199442	0.0110795	0.00239	0.0014	0.0346125	0	0.00136	2.76e-06	1.24e-06	2.24e-06	6.79e-07
k__Fungi;p__Basidiomycota;c__Agaricomycetes;o__Auriculariales;f__Auriculariaceae;__	0.00704	0	0	0.247392	0.377354	0.0594352	0.00152	0.0158122	0	0	0.000520626	0.000322407	0.000584793	0.000334186
k__Fungi;p__Ascomycota;c__Sordariomycetes;o__Sordariales;f__Chaetomiaceae;g__Chaetomium	0.00738	0.00132	0.00312	0.0954575	0.058656	0	0.000234	0.0143181	0	0.000371	2.24e-06	9.42e-07	3e-06	9.68e-07
k__Fungi;p__Ascomycota;c__Eurotiomycetes;o__Eurotiales;f__Aspergillaceae;g__Aspergillus	0.00738	0	0	0.00365	0	0.000478	0.000234	0.00859	0	0.00173	0.0587206	0.0507458	0.0233519	0.0184332
k__Fungi;p__Ascomycota;c__Orbiliomycetes;o__Orbiliales;f__Orbiliaceae;g__Arthrobotrys	0	0.0066	0	0.000221	0	0	0.00374	0.00548	0	0.000867	0.00890433	0.00665267	0.00444083	0.00302474
k__Fungi;p__Ascomycota;c__Dothideomycetes;o__Dothideales;f__Zalariaceae;g__Zalaria	0	0.00193	0.00223	0.0150606	0	0.000797	0.000819	0.00237	0	0	0.0549194	0.0459494	0.0248184	0.0191852
k__Fungi;p__Chytridiomycota;c__Rhizophydiomycetes;o__Rhizophydiales;f__unidentified;g__unidentified	0.00268	0	0	0.000997	0.0013	0	0.000585	0.00237	0	0.0143616	0.0138684	0.0106092	0.00733088	0.00519879
k__Fungi;p__Ascomycota;c__Sordariomycetes;o__Hypocreales;f__Clavicipitaceae;g__Metapochonia	0.00101	0.0215124	0.0499665	0.00377	0	0	0.000585	0.00112	0	0.00545	0.00027394	0.000184585	0.0002808	0.000149642
k__Fungi;p__Basidiomycota;c__Atractiellomycetes;o__Atractiellales;f__Hoehnelomycetaceae;g__Atractiella	0	0.0548973	0.00669	0.000997	0	0	0	0.000747	0	0	0.00247522	0.00167916	0.00701647	0.00494406
k__Fungi;p__Ascomycota;c__Leotiomycetes;o__Helotiales;f__Hyaloscyphaceae;g__unidentified	0.00469	0.013496	0.0901182	0.00631	0.00196	0.0175278	0.0174278	0.000623	0	0.000248	0.00186298	0.00135188	0.00142479	0.000878833
k__Fungi;p__Ascomycota;c__Sordariomycetes;o__Sordariales;f__Sordariales_fam_Incertae_sedis;g__Clathrosporium	0.00134	0.013496	0.000892	0.0439636	0.00196	0.0162531	0.00117	0.000623	0	0.00409	0.0520814	0.0436681	0.0387928	0.0312074
k__Fungi;p__Basidiomycota;c__Agaricomycetes;o__Agaricales;f__Squamanitaceae;g__Squamanita	0.0191151	0	0	0.015725	0	0	0.000351	0.000623	0	0.0031	0.00365639	0.00266042	0.000761427	0.000439168
k__Fungi;p__Ascomycota;c__Saccharomycetes;o__Saccharomycetales;f__Lipomycetaceae;g__Lipomyces	0	0.00304	0	0.00199	0	0.00717	0.000936	0.000498	0	0	0.0769024	0.068722	0.0316047	0.025948
k__Fungi;p__Basidiomycota;__;__;__;__	0	0	0	0.0174968	0	0.00112	0.0014	0.000498	0	0.00248	0.00955212	0.00705469	0.00162734	0.000985436
k__Fungi;p__Basidiomycota;c__Microbotryomycetes;o__Kriegeriales;f__Kriegeriaceae;g__Yamadamyces	0.00436	0.0593621	0.00223	0.00299	0.0254176	0.000637	0.000468	0.000249	0	0	0.000406906	0.000259929	0.00114532	0.000687447
k__Fungi;p__Ascomycota;c__Leotiomycetes;o__Helotiales;f__Helotiaceae;g__Bryoglossum	0.00838	0	0	0.140639	0.0215072	0.893122	0.000234	0	0	0	0.000185276	0.000105457	0.000429405	0.000238745
k__Fungi;p__Basidiomycota;c__Agaricomycetes;o__Agaricales;__;__	0	0.0558105	0.00134	0	0	0.015775	0	0	0	0	0.00987528	0.00734713	0.011795	0.00890308
k__Fungi;p__Ascomycota;c__Leotiomycetes;o__Helotiales;f__Helotiaceae;g__Meliniomyces	0	0.219285	0.61209	0.0959004	0.0299797	0.0130662	0.0014	0	0	0	4.52e-12	8.84e-13	7.84e-10	4.18e-11
k__Fungi;p__Ascomycota;c__Sordariomycetes;o__Hypocreales;f__Nectriaceae;__	0.00335	0.124407	0.00357	0.00365	0.00587	0.00733	0.00912	0	0	0.000867	0.000204415	0.000122467	0.00144765	0.00087501
k__Fungi;p__Basidiomycota;c__Pucciniomycetes;o__Pachnocybales;f__Pachnocybaceae;__	0	0.0409954	0	0	0	0.0051	0.0014	0	0	0	9.86e-05	5.76e-05	0.000388357	0.000219155
k__Fungi;p__Ascomycota;c__Dothideomycetes;o__Pleosporales;f__Didymellaceae;g__Neoascochyta	0.115026	0.0101474	0	0.00321	0	0.00319	0.000468	0	0	0	0.0390689	0.0336952	0.0338307	0.0278807
k__Fungi;p__Basidiomycota;c__Agaricomycetes;o__Boletales;f__Boletales_fam_Incertae_sedis;g__Hydnomerulius	0	0.0228316	0.0785188	0.00742	0.0013	0.000319	0	0	0	0	0.000373796	0.000261812	0.000124824	6.8e-05
k__Fungi;p__Basidiomycota;c__Agaricomycetes;o__Hymenochaetales;f__Tubulicrinaceae;g__Tubulicrinis	0	0.0884851	0.147669	0.940289	0	0	0	0	0	0	0.000162584	9.12e-05	0.00104177	0.000629295
k__Fungi;p__Basidiomycota;c__Agaricomycetes;o__Polyporales;f__Fomitopsidaceae;g__unidentified	0.00402	0.000812	0.000892	0.0173861	0.00847	0	0	0	0	0.000248	0.00629121	0.00458597	0.00132557	0.000808877
k__Fungi;p__Basidiomycota;c__Tremellomycetes;o__unidentified;f__unidentified;g__unidentified	0	0.0234404	0	0	0.00652	0	0	0	0	0	6.01e-05	3.48e-05	0.000264734	0.000142463
k__Fungi;p__Ascomycota;c__Leotiomycetes;o__Helotiales;f__Discinellaceae;g__Lemonniera	0	0	0	0.125689	0	0	0.00468	0	0	0	0.0171395	0.0145845	0.0320374	0.0258448
k__Fungi;p__Ascomycota;c__Leotiomycetes;o__Helotiales;f__Leptodontidiaceae;g__Leptodontidium	0.00201	0.157589	0	0.0366548	0	0	0	0	0	0	0.000543682	0.000335546	0.000190957	9.54e-05
k__Fungi;p__Basidiomycota;c__Agaricomycetes;o__Cantharellales;f__Botryobasidiaceae;g__Botryobasidium	0	0	0	0.0137317	0	0	0.030177	0	0	0	0.0623983	0.052871	0.0301405	0.023926
k__Fungi;p__Ascomycota;c__Dothideomycetes;o__Tubeufiales;f__Tubeufiaceae;g__Acanthostigmina	0	0.00832	0	0.00122	0	0	0	0	0	0	0.0160013	0.0128015	0.0129675	0.00986619

## Sheet: Table_S8
Table S1. Bacterial taxa differentially represented between rootstocks microbioms. The values represent % of the reads in the group. Benjamini-Hochberg corrected P value of Kruskal-Wallace test, kw.eBH < 0.05. Genera level annotation.
Taxa	Bud118_rel_abnd_%	G210_rel_abnd_%	G214_rel_abnd_%	G969_rel_abnd_%	G890_rel_abnd_%	G935_rel_abnd_%	G41_rel_abnd_%	M26_rel_abnd_%	Pajam2_rel_abnd_%	Supporter4_rel_abnd_%	glm.eBH	glm.ep	kw.eBH	kw.ep
d__Bacteria;p__Proteobacteria;c__Alphaproteobacteria;o__Rhizobiales;f__Rhizobiaceae;g__Allorhizobium-Neorhizobium-Pararhizobium-Rhizobium	19.4318	8.08051	10.7173	8.52183	11.3048	15.5775	17.089	11.1458	10.8467	12.4039	4.48e-14	4.5e-15	1.58e-08	1.63e-09
d__Bacteria;p__Proteobacteria;c__Alphaproteobacteria;o__Sphingomonadales;f__Sphingomonadaceae;g__Sphingobium	9.12205	5.06459	9.08591	16.216	6.38761	8.36973	6.78056	9.14915	5.4174	10.0344	3.75e-18	1.62e-19	2.83e-09	1.58e-10
d__Bacteria;p__Proteobacteria;c__Gammaproteobacteria;o__Pseudomonadales;f__Pseudomonadaceae;g__Pseudomonas	7.04003	19.8446	7.06102	5.41112	3.3415	5.2024	2.31148	3.8239	1.25284	18.4023	6.26e-21	1.61e-22	7.02e-10	1.91e-11
d__Bacteria;p__Actinobacteriota;c__Actinobacteria;o__Streptomycetales;f__Streptomycetaceae;g__Streptomyces	6.60029	8.48892	0.647392	1.5543	4.30111	4.00911	8.66955	10.3593	10.6986	4.03764	1.2e-14	1.1e-15	1.28e-07	2.2e-08
d__Bacteria;p__Bacteroidota;c__Bacteroidia;o__Flavobacteriales;f__Flavobacteriaceae;g__Flavobacterium	4.19353	2.7206	4.77986	2.69083	4.12609	2.86766	2.92954	2.52627	1.81092	3.00294	3.35e-08	7.99e-09	1.98e-05	7.29e-06
d__Bacteria;p__Proteobacteria;c__Alphaproteobacteria;o__Rhizobiales;f__Xanthobacteraceae;__	2.96228	2.09241	1.99459	2.57612	2.24899	3.5507	2.59498	3.20749	2.51542	2.41811	2.63e-12	3.55e-13	1.03e-07	1.71e-08
d__Bacteria;p__Proteobacteria;c__Gammaproteobacteria;o__Enterobacterales;f__Erwiniaceae;g__Erwinia	0.398046	3.87094	0.254239	0.275713	0.183151	0.199781	0.0797897	0.0798422	0.01111	1.77139	2.94e-12	4.92e-13	1.43e-09	5.96e-11
d__Bacteria;p__Proteobacteria;c__Alphaproteobacteria;o__Caulobacterales;f__Caulobacteraceae;g__Phenylobacterium	1.47045	3.20647	0.611571	0.669813	4.99559	3.73158	4.61119	4.83968	3.92836	3.89644	4.48e-25	3.11e-27	3.71e-10	3.17e-12
d__Bacteria;p__Proteobacteria;c__Gammaproteobacteria;o__Burkholderiales;f__Burkholderiaceae;g__Burkholderia-Caballeronia-Paraburkholderia	1.94318	2.746	2.09274	5.62422	2.26699	1.39145	4.09108	2.03249	1.34461	2.42773	5.11e-16	3.51e-17	8.13e-09	6.67e-10
d__Bacteria;p__Proteobacteria;c__Gammaproteobacteria;o__Burkholderiales;f__Comamonadaceae;__	2.24653	2.36532	2.18972	3.35696	2.3387	3.81473	1.89938	2.33899	2.37038	2.91739	4.92e-11	7.72e-12	9.69e-07	2.4e-07
d__Bacteria;p__Bacteroidota;c__Bacteroidia;o__Chitinophagales;f__Chitinophagaceae;__	1.47167	1.82974	1.45263	1.53273	2.92241	2.906	2.2663	2.60022	3.2779	1.46481	0.0459216	0.0346844	0.0354461	0.0268789
d__Bacteria;p__Proteobacteria;c__Alphaproteobacteria;o__Caulobacterales;f__Caulobacteraceae;g__Caulobacter	2.75012	1.65583	3.54944	4.21882	2.05411	3.25967	2.285	2.01481	1.39468	1.86865	4.94e-17	2.62e-18	4.13e-09	2.75e-10
d__Bacteria;p__Proteobacteria;c__Alphaproteobacteria;o__Sphingomonadales;f__Sphingomonadaceae;g__Novosphingobium	2.68704	1.63428	5.52482	3.42062	2.31938	1.59069	2.01205	2.88393	1.45921	1.76359	3.2e-28	7.55e-31	1.62e-10	3.1e-13
d__Bacteria;p__Proteobacteria;c__Alphaproteobacteria;o__Rhizobiales;f__Rhizobiaceae;__	1.52177	1.60974	2.41046	2.08731	1.78365	2.10472	1.06634	1.62413	1.42558	1.60913	1.88e-10	3.23e-11	9.2e-07	2.25e-07
d__Bacteria;p__Bacteroidota;c__Bacteroidia;o__Sphingobacteriales;f__Sphingobacteriaceae;g__Mucilaginibacter	0.938141	1.05922	3.41082	3.24752	1.28539	1.40225	2.00859	1.02229	0.543627	1.28382	1.51e-21	3.3e-23	7.45e-10	2.14e-11
d__Bacteria;p__Proteobacteria;c__Alphaproteobacteria;o__Sphingomonadales;f__Sphingomonadaceae;__	1.26073	0.73787	2.5651	1.7874	1.6161	1.05344	1.85645	0.924155	1.54946	1.40188	3.72e-16	2.73e-17	1.31e-08	1.27e-09
d__Bacteria;p__Proteobacteria;c__Gammaproteobacteria;o__Burkholderiales;f__Oxalobacteraceae;__	2.07317	1.45355	2.44337	3.83788	1.42762	2.68084	1.18508	1.24073	1.38524	3.20734	5.04e-13	5.99e-14	6.6e-08	9.9e-09
d__Bacteria;p__Actinobacteriota;c__Actinobacteria;o__Frankiales;f__Frankiaceae;g__Jatrophihabitans	0.540554	0.942502	2.02546	0.900275	2.11676	1.76239	1.69064	0.669279	0.707081	0.71329	2.61e-18	1.2e-19	2.04e-09	1.05e-10
d__Bacteria;p__Proteobacteria;c__Alphaproteobacteria;o__Sphingomonadales;f__Sphingomonadaceae;g__Sphingomonas	1.44158	1.011	1.87694	1.10601	1.20914	0.703012	1.69999	1.2398	0.668576	0.77414	9.44e-24	1.04e-25	3.72e-10	3.5e-12
d__Bacteria;p__Actinobacteriota;c__Actinobacteria;o__Micrococcales;f__Microbacteriaceae;__	0.61998	1.08653	1.79773	0.57142	1.1013	0.748908	0.811051	0.767416	1.1215	0.247818	5.58e-14	6.24e-15	1.08e-06	2.73e-07
d__Bacteria;p__Bacteroidota;c__Bacteroidia;o__Chitinophagales;f__Chitinophagaceae;g__Puia	0.51474	0.736163	0.740583	0.779256	1.55585	2.02157	1.35192	1.59343	1.45708	0.657121	9.65e-09	2.16e-09	3.97e-06	1.2e-06
d__Bacteria;p__Actinobacteriota;c__Actinobacteria;o__Frankiales;f__Frankiaceae;g__Frankia	0.679091	0.969175	0.0302873	0.00631403	0.711142	0.611761	1.14267	1.88319	2.59821	1.39564	2.72e-17	1.99e-18	1.41e-09	5.87e-11
d__Bacteria;p__Proteobacteria;c__Gammaproteobacteria;o__Pseudomonadales;f__Moraxellaceae;g__uncultured	0.964871	0.902387	0.368107	0.882912	0.856303	0.968667	0.862109	1.59964	1.8511	1.45648	1.89e-10	3.38e-11	6.93e-07	1.62e-07
d__Bacteria;p__Proteobacteria;c__Gammaproteobacteria;o__Xanthomonadales;f__Rhodanobacteraceae;__	0.532458	0.270993	0.304912	0.501439	0.705143	0.741889	0.73905	1.12027	0.837661	0.851892	6.98e-08	1.77e-08	1.3e-05	4.55e-06
d__Bacteria;p__Proteobacteria;c__Gammaproteobacteria;o__Burkholderiales;f__Methylophilaceae;__	0.458073	0.234719	0.473822	0.740846	0.261663	0.31695	0.469911	0.356422	0.236353	0.617075	1.63e-16	1.02e-17	3.17e-09	1.87e-10
d__Bacteria;p__Proteobacteria;c__Alphaproteobacteria;o__Caulobacterales;f__Caulobacteraceae;g__Asticcacaulis	0.500077	0.721867	0.950265	0.877124	1.20354	0.886055	0.896725	0.617653	0.941303	0.613435	7.14e-07	2.27e-07	5.09e-05	2.13e-05
d__Bacteria;p__Proteobacteria;c__Alphaproteobacteria;o__Dongiales;f__Dongiaceae;g__Dongia	0.400795	0.412892	0.224243	0.14838	0.603437	0.609061	0.38614	0.854855	0.910256	0.608754	6.34e-12	1.05e-12	7.46e-08	1.2e-08
d__Bacteria;p__Bacteroidota;c__Bacteroidia;o__Chitinophagales;f__Chitinophagaceae;g__Ferruginibacter	0.669621	0.995207	0.848627	0.23625	1.41442	0.860137	1.04696	0.76354	1.46362	0.565847	4.04e-09	9.29e-10	9.07e-05	3.94e-05
d__Bacteria;p__Proteobacteria;c__Alphaproteobacteria;o__Rhizobiales;f__Rhizobiaceae;g__Mesorhizobium	0.422637	0.353145	1.04229	0.790306	0.662088	0.567485	0.516642	0.760594	0.665837	0.473533	2.37e-14	2.52e-15	4.37e-08	6.22e-09
d__Bacteria;p__Verrucomicrobiota;c__Verrucomicrobiae;o__Methylacidiphilales;f__Methylacidiphilaceae;g__uncultured	0.353292	0.250722	0.90862	1.31753	0.918819	0.388223	0.726242	0.453318	0.439528	0.463132	8.88e-21	2.55e-22	5.95e-10	1.38e-11
d__Bacteria;p__Bacteroidota;c__Bacteroidia;o__Cytophagales;f__Microscillaceae;g__uncultured	1.14969	0.539853	0.702433	0.306757	0.770193	1.37957	0.899668	0.721216	1.06777	0.458971	8.04e-14	8.81e-15	3.08e-08	3.92e-09
d__Bacteria;p__Bacteroidota;c__Bacteroidia;o__Cytophagales;f__Cytophagaceae;g__Cytophaga	0.307622	0.202071	0.0838726	0.0731375	0.538922	0.278073	0.71378	0.353941	0.847249	0.417885	7.42e-10	1.72e-10	4.83e-09	3.42e-10
d__Bacteria;p__Proteobacteria;c__Alphaproteobacteria;o__Rhizobiales;f__Xanthobacteraceae;g__Bradyrhizobium	0.249428	0.417159	0.680591	0.440403	0.751664	0.909273	0.428372	0.724161	0.831877	0.375758	2.62e-06	9.04e-07	4.8e-05	2e-05
d__Bacteria;p__Actinobacteriota;c__Actinobacteria;o__Corynebacteriales;f__Mycobacteriaceae;g__Mycobacterium	0.482206	0.25371	0.901048	0.282553	0.963874	0.463815	0.555758	1.07283	1.12561	0.362496	6.42e-15	6.81e-16	1.75e-08	1.91e-09
d__Bacteria;p__Bacteroidota;c__Bacteroidia;o__Cytophagales;f__Spirosomaceae;g__Dyadobacter	0.590806	0.393047	1.16985	0.180476	0.560516	0.240817	0.531008	0.323865	0.346996	0.264721	2.84e-12	4.09e-13	1.35e-07	2.39e-08
d__Bacteria;p__Proteobacteria;c__Alphaproteobacteria;o__Rhizobiales;f__Kaistiaceae;g__Kaistia	0.266687	0.116079	0.62089	0.297812	0.364302	0.174403	0.393064	0.389754	0.258116	0.221034	6.6e-19	2.93e-20	9e-10	3.08e-11
d__Bacteria;p__Bacteroidota;c__Bacteroidia;o__Cytophagales;f__Microscillaceae;g__Ohtaekwangia	0.917826	0.721227	0.016891	0.046829	0.330578	0.464355	0.389775	0.78571	0.783785	0.181248	5.09e-11	9.38e-12	4.77e-08	6.66e-09
d__Bacteria;p__Proteobacteria;c__Alphaproteobacteria;o__Caulobacterales;f__Caulobacteraceae;__	0.341378	0.472638	0.670981	0.585626	0.496666	0.258635	0.36139	0.411924	0.2709	0.32323	1.32e-08	2.97e-09	8.51e-06	2.83e-06
d__Bacteria;p__Proteobacteria;c__Gammaproteobacteria;o__Steroidobacterales;f__Steroidobacteraceae;g__Steroidobacter	0.628228	0.464316	0.175026	0.0394627	1.17422	1.18411	0.333351	0.935627	0.760956	0.45221	2.93e-10	6.37e-11	1.13e-07	1.94e-08
d__Bacteria;p__Actinobacteriota;c__Actinobacteria;o__Micrococcales;f__Microbacteriaceae;g__Galbitalea	0.422484	0.346103	1.07724	0.513541	0.449746	0.2095	0.305312	0.295339	0.234983	0.0951747	1.02e-16	6.8e-18	1e-08	9.08e-10
d__Bacteria;p__Proteobacteria;c__Alphaproteobacteria;o__Acetobacterales;f__Acetobacteraceae;g__Acidocella	0.165114	0.162809	0.201527	0.39831	0.405091	0.4136	0.297178	0.445721	0.190543	0.154204	0.000207183	9.41e-05	0.000854664	0.000451273
d__Bacteria;p__Proteobacteria;c__Alphaproteobacteria;o__Rhizobiales;f__Labraceae;g__Labrys	0.131969	0.121627	0.0681465	0.0668235	0.272327	0.20626	0.243004	0.310222	0.244571	0.108957	1.26e-10	2.39e-11	1.14e-07	2.12e-08
d__Bacteria;p__Proteobacteria;c__Gammaproteobacteria;o__Gammaproteobacteria_Incertae_Sedis;f__Unknown_Family;g__Acidibacter	0.0976021	0.208686	0.110374	0.135752	0.305518	0.267814	0.214446	0.445876	0.519885	0.137821	0.000169969	8.31e-05	2.56e-05	1.02e-05
d__Bacteria;p__Bacteroidota;c__Bacteroidia;o__Chitinophagales;f__Chitinophagaceae;g__Niastella	0.310219	0.825783	0.0011649	0.00947104	0.501998	0.191142	0.200253	1.40693	2.95616	0.413204	1.79e-15	1.8e-16	3.51e-09	2.1e-10
d__Bacteria;p__Bacteroidota;c__Bacteroidia;o__Chitinophagales;f__Chitinophagaceae;g__Terrimonas	0.186345	0.380458	0.0774657	0.0463029	0.344174	0.172783	0.182772	0.305416	0.536474	0.0616295	4.62e-09	1.19e-09	2.28e-07	4.62e-08
d__Bacteria;p__Proteobacteria;c__Alphaproteobacteria;o__Sphingomonadales;f__Sphingomonadaceae;g__Parablastomonas	0.02841	0.131229	0.0113577	0.00789254	0.221007	0.00215979	0.0835974	0.536881	0.232396	0.267321	1.37e-11	2.6e-12	4.3e-10	5.74e-12
d__Bacteria;p__Bacteroidota;c__Bacteroidia;o__Chitinophagales;f__Chitinophagaceae;g__Edaphobaculum	0.815947	0.162383	0.465085	0.226253	0.349239	0.248376	0.866609	0.294719	0.246093	0.190869	1.1e-13	1.19e-14	5.98e-08	8.8e-09
d__Bacteria;p__Myxococcota;c__Polyangia;o__Polyangiales;f__Polyangiaceae;g__Aetherobacter	0.757753	0.145952	0.179394	0.0157851	0.505597	0.132287	0.625163	0.293168	0.27851	0.109477	7.85e-09	2.1e-09	1e-08	9.34e-10
d__Bacteria;p__Bacteroidota;c__Bacteroidia;o__Sphingobacteriales;f__Sphingobacteriaceae;g__Pedobacter	0.730259	0.545614	0.772618	0.229936	0.870299	0.221919	0.283677	0.292548	0.176542	0.342993	0.000244105	0.000139492	6.93e-05	2.93e-05
d__Bacteria;p__Proteobacteria;c__Gammaproteobacteria;o__Xanthomonadales;f__Rhodanobacteraceae;g__Dyella	0.269284	0.231305	0.0690201	0.498282	0.226739	0.0356366	0.211503	0.268983	0.130732	0.284484	9.68e-08	3.12e-08	6.12e-06	1.96e-06
d__Bacteria;p__Myxococcota;c__Polyangia;o__Polyangiales;f__BIrii41;g__BIrii41	0.158699	0.139978	0.0256277	0.0268346	0.279658	0.0642538	0.0803089	0.261386	1.55874	0.0556486	7.8e-09	1.99e-09	5.02e-08	7.43e-09
d__Bacteria;p__Proteobacteria;c__Gammaproteobacteria;o__Burkholderiales;f__Comamonadaceae;g__Rhizobacter	0.24958	0.517662	0.132798	0.0905011	0.664621	0.823421	0.392198	0.255185	0.626419	0.478734	5.62e-15	5.63e-16	9.21e-09	8.18e-10
d__Bacteria;p__Proteobacteria;c__Alphaproteobacteria;o__Rhizobiales;f__Xanthobacteraceae;g__Rhodopseudomonas	0.385979	0.242614	0.685542	0.544059	0.231671	0.31695	0.302889	0.246968	0.135907	0.262641	4.75e-15	4.15e-16	2.24e-08	2.57e-09
d__Bacteria;p__Bdellovibrionota;c__Bdellovibrionia;o__Bdellovibrionales;f__Bdellovibrionaceae;g__Bdellovibrio	0.235681	0.230024	0.314231	0.524591	0.364702	0.550207	0.389083	0.244643	0.311535	0.287344	1.26e-11	2.06e-12	3.77e-08	5.5e-09
d__Bacteria;p__Myxococcota;c__Polyangia;o__Haliangiales;f__Haliangiaceae;g__Haliangium	0.0866047	0.169638	0.076592	0.0768207	0.167155	0.225698	0.0832513	0.240302	0.266943	0.0863333	0.00184911	0.00106755	0.00104445	0.000571493
d__Bacteria;p__Verrucomicrobiota;c__Verrucomicrobiae;o__Verrucomicrobiales;f__Rubritaleaceae;g__Luteolibacter	0.201161	0.125468	0.426061	0.202049	0.328045	0.20572	0.360525	0.23193	0.239853	0.199711	0.00336919	0.00249287	2.09e-07	4.11e-08
d__Bacteria;p__Planctomycetota;c__Phycisphaerae;o__Tepidisphaerales;f__WD2101_soil_group;g__WD2101_soil_group	0.0948527	0.127602	0.145321	0.109969	0.256198	0.170084	0.257369	0.227279	0.240919	0.148223	0.000920479	0.000509254	0.00179686	0.00102709
d__Bacteria;p__Proteobacteria;c__Alphaproteobacteria;o__Caulobacterales;f__Caulobacteraceae;g__Brevundimonas	0.480526	0.290411	0.517797	0.136278	0.342441	0.330448	0.312755	0.224644	0.127384	0.167726	2.85e-09	6.28e-10	1.57e-06	4.17e-07
d__Bacteria;p__Bacteroidota;c__Bacteroidia;o__Cytophagales;f__Hymenobacteraceae;g__Hymenobacter	0.0229113	0.0891931	0.0955216	0.0121019	0.225139	0.150106	0.0138464	0.209295	0.0415482	0.0917942	4.74e-06	2.2e-06	9.24e-07	2.29e-07
d__Bacteria;p__Actinobacteriota;c__Actinobacteria;o__Propionibacteriales;f__Nocardioidaceae;g__Marmoricola	0.232321	0.128455	0.0870761	0.0326225	0.139296	0.0869316	0.166503	0.200458	0.213524	0.0933544	0.000183825	0.00012753	1.42e-06	4e-07
d__Bacteria;p__Actinobacteriota;c__Actinobacteria;o__Micromonosporales;f__Micromonosporaceae;g__Actinoplanes	0.0789676	0.498884	0.00902795	0	0.137963	0.246756	0.0418853	0.196737	0.213524	0.0343253	3.56e-08	1.1e-08	8.91e-09	7.93e-10
d__Bacteria;p__Bacteroidota;c__Bacteroidia;o__Sphingobacteriales;f__env.OPS_17;g__env.OPS_17	0.17214	0.176252	0.371602	0.448296	0.206478	0.296431	0.29787	0.194257	0.254312	0.228575	2.26e-10	4.05e-11	6.59e-07	1.57e-07
d__Bacteria;p__Bacteroidota;c__Bacteroidia;o__Chitinophagales;f__Chitinophagaceae;g__Filimonas	1.33466	0.149793	0.0489257	0.0247299	0.147027	0.183582	0.230369	0.193637	0.258269	0.146663	1.42e-09	3.56e-10	4.52e-08	6.33e-09
d__Bacteria;p__Proteobacteria;c__Alphaproteobacteria;o__Caulobacterales;f__Hyphomonadaceae;g__SWB02	0.0360471	0.211247	0.00320347	0.00157851	0.13543	0.116629	0.0546931	0.188831	0.252181	0.0507078	1.53e-12	2.47e-13	7.51e-10	2.14e-11
d__Bacteria;p__Proteobacteria;c__Alphaproteobacteria;o__Rhizobiales;f__Hyphomicrobiaceae;g__Hyphomicrobium	0.0533069	0.073403	0.0527116	0.0336748	0.13503	0.0944909	0.0811743	0.188521	0.2327	0.0808725	6.4e-06	2.38e-06	2.72e-05	1.08e-05
d__Bacteria;p__Proteobacteria;c__Gammaproteobacteria;o__R7C24;f__R7C24;g__R7C24	0.0581947	0.10733	0.0789218	0.0426197	0.177419	0.114469	0.104194	0.187901	0.32021	0.116498	0.000241427	0.000132334	5.7e-05	2.44e-05
d__Bacteria;p__Bdellovibrionota;c__Oligoflexia;o__0319-6G20;f__0319-6G20;g__0319-6G20	0.107225	0.132723	0.529737	0.687177	0.186616	0.161444	0.312062	0.182629	0.199827	0.150303	3.82e-16	2.79e-17	6.06e-08	9.12e-09
d__Bacteria;p__Proteobacteria;c__Alphaproteobacteria;__;__;__	0.209562	0.215941	0.274042	0.430932	0.521593	0.449777	0.305658	0.178288	0.236201	0.32401	5.74e-11	9.62e-12	1.53e-06	4.09e-07
d__Bacteria;p__Acidobacteriota;c__Acidobacteriae;o__Acidobacteriales;f__Acidobacteriaceae_(Subgroup_1);g__Granulicella	0.0809532	0.0859924	0.472366	0.685072	0.246734	0.187902	0.246811	0.176893	0.0873578	0.110517	7.4e-15	7.25e-16	2.64e-08	3.17e-09
d__Bacteria;p__Bacteroidota;c__Bacteroidia;o__Cytophagales;f__Spirosomaceae;g__Larkinella	0.013594	0.0413959	0.0122314	0.00315701	0.0607836	0.0183582	0.0102117	0.170537	0.054941	0.00338052	1.15e-06	4.42e-07	8.41e-08	1.41e-08
d__Bacteria;p__Bacteroidota;c__Bacteroidia;o__Chitinophagales;f__Chitinophagaceae;g__Pseudoflavitalea	0.0826334	0.363601	0.0838726	0.0883964	0.294721	0.199781	0.235734	0.167591	0.316406	0.0470673	0.000627603	0.000329832	0.00374455	0.00226255
d__Bacteria;p__Bacteroidota;c__Bacteroidia;o__Cytophagales;f__Microscillaceae;g__Chryseolinea	0.129525	0.466023	0.00698938	0.00473552	0.27046	0.490813	0.0842897	0.161855	0.372412	0.0626697	7.99e-15	9.91e-16	3.74e-10	4.02e-12
d__Bacteria;p__Actinobacteriota;c__Actinobacteria;o__Micrococcales;f__Cellulomonadaceae;g__Cellulomonas	0.135024	0.171771	0.0605746	0.0210468	0.13663	0.0982705	0.14331	0.16108	0.202719	0.114418	3.33e-06	1.51e-06	2.17e-07	4.59e-08
d__Bacteria;p__Proteobacteria;c__Alphaproteobacteria;o__Rhizobiales;f__Beijerinckiaceae;g__Methylobacterium-Methylorubrum	0.123874	0.0851389	0.244628	0.216782	0.249133	0.160365	0.0855013	0.157204	0.354301	0.090754	0.000492812	0.00029908	1.01e-06	2.6e-07
d__Bacteria;p__Cyanobacteria;c__Vampirivibrionia;o__Vampirovibrionales;f__Vampirovibrionaceae;g__Vampirovibrio	0.0226058	0.0121627	0.000582448	0	0.053319	0.00863917	0.0205965	0.155033	0.154931	0.0179428	1.21e-06	4.84e-07	5.46e-08	8.25e-09
d__Bacteria;p__Proteobacteria;c__Gammaproteobacteria;o__Burkholderiales;f__Alcaligenaceae;__	0.263633	0.0584663	0.0291224	0.0794515	0.0926417	0.0566945	0.12756	0.154103	0.0911626	0.19581	1.48e-05	6.66e-06	1.03e-06	2.6e-07
d__Bacteria;p__Proteobacteria;c__Alphaproteobacteria;o__Rhizobiales;__;__	0.208645	0.242827	0.756892	0.591414	0.476005	0.534009	0.79807	0.149142	0.318841	0.160445	1.51e-22	2.9e-24	6.22e-10	1.49e-11
d__Bacteria;p__Verrucomicrobiota;c__Verrucomicrobiae;o__Pedosphaerales;f__Pedosphaeraceae;g__uncultured	0.0400184	0.0369149	0.226281	0.218886	0.123034	0.0917912	0.0839436	0.146662	0.11597	0.0652701	1.04e-10	1.87e-11	4.32e-07	9.81e-08
d__Bacteria;p__Proteobacteria;c__Alphaproteobacteria;o__Rhizobiales;f__Beijerinckiaceae;g__Bosea	0.315718	0.261391	0.118819	0.074716	0.225273	0.241897	0.27485	0.144801	0.631746	0.372377	8.83e-06	3.83e-06	4.12e-07	9.58e-08
d__Bacteria;p__Myxococcota;c__Polyangia;o__Polyangiales;f__Polyangiaceae;g__Pajaroellobacter	0.239958	0.175826	0.184636	0.467764	0.214209	0.389303	0.447238	0.144181	0.183847	0.177087	3.94e-12	5.72e-13	9.88e-08	1.68e-08
d__Bacteria;p__Proteobacteria;c__Alphaproteobacteria;o__Caulobacterales;f__Caulobacteraceae;g__uncultured	0.0983658	0.169211	0.21405	0.279922	0.369101	0.173323	0.120117	0.142786	0.160562	0.0873735	1.81e-08	4.77e-09	4.03e-06	1.3e-06
d__Bacteria;p__Actinobacteriota;c__Actinobacteria;o__Micrococcales;f__Microbacteriaceae;g__Microbacterium	0.0959219	0.0859924	0.0323259	0.0115757	0.0973071	0.0286172	0.0650779	0.142476	0.191457	0.0296446	3.71e-05	1.85e-05	1.12e-06	3.01e-07
d__Bacteria;p__Proteobacteria;c__Alphaproteobacteria;o__Micropepsales;f__Micropepsaceae;g__uncultured	0.0701086	0.112452	0.193955	0.368844	0.225273	0.182502	0.137079	0.14046	0.204849	0.121699	2.28e-13	2.85e-14	1.75e-06	4.86e-07
d__Bacteria;p__Acidobacteriota;c__Acidobacteriae;o__Acidobacteriales;f__Acidobacteriaceae_(Subgroup_1);g__Edaphobacter	0.0626242	0.0428895	0.0378592	0.0257823	0.0799785	0.0734329	0.114752	0.138755	0.0834008	0.0785321	0.000472499	0.000286755	0.000220285	0.000110627
d__Bacteria;p__Bdellovibrionota;c__Bdellovibrionia;o__Bacteriovoracales;f__Bacteriovoracaceae;g__Bacteriovorax	0.104781	0.102209	0.408588	0.72243	0.23487	0.118249	0.156464	0.131158	0.0764	0.319069	6.12e-21	1.79e-22	7.02e-10	1.92e-11
d__Bacteria;p__Proteobacteria;c__Alphaproteobacteria;o__Rhizobiales;f__Xanthobacteraceae;g__Azorhizobium	0.162976	0.0337141	0.00902795	0	0.0763794	0.0431958	0.100559	0.130383	0.0975546	0.0249639	1.42e-09	3.5e-10	3.47e-09	2.22e-10
d__Bacteria;p__Chloroflexi;c__Chloroflexia;o__Chloroflexales;f__Roseiflexaceae;g__uncultured	0.084619	0.167931	0.00436836	0	0.0657156	0.0858517	0.0379044	0.127282	0.290229	0.0249639	4.21e-09	1.16e-09	7.16e-09	5.95e-10
d__Bacteria;p__Bacteroidota;c__Bacteroidia;o__Chitinophagales;f__Chitinophagaceae;g__Taibaiella	0.164503	0.111171	0.235309	0.175214	0.135963	0.280773	0.214272	0.122011	0.0715299	0.328171	9.89e-11	1.65e-11	4.96e-07	1.11e-07
d__Bacteria;p__Acidobacteriota;c__Acidobacteriae;o__Acidobacteriales;f__Acidobacteriaceae_(Subgroup_1);g__Terriglobus	0.0904232	0.0714825	0.104258	0.113653	0.104772	0.0691134	0.12479	0.121081	0.0388088	0.0717711	2.45e-05	1.21e-05	1.65e-05	6.07e-06
d__Bacteria;p__Verrucomicrobiota;c__Verrucomicrobiae;o__Chthoniobacterales;f__Chthoniobacteraceae;g__Chthoniobacter	0.122499	0.10413	0.180268	0.13049	0.224473	0.10799	0.102809	0.119066	0.158431	0.0572088	0.00170766	0.00113901	1.49e-05	5.66e-06
d__Bacteria;p__Proteobacteria;c__Alphaproteobacteria;o__Rhizobiales;f__Beijerinckiaceae;__	0.0484192	0.0324339	0.112704	0.0452505	0.0790454	0.0399562	0.0458661	0.113174	0.072443	0.0626697	0.00535813	0.00388206	9.5e-06	3.39e-06
d__Bacteria;p__Proteobacteria;c__Alphaproteobacteria;o__Elsterales;f__Elsteraceae;g__uncultured	0.134413	0.0708424	0.172114	0.115757	0.144761	0.20518	0.227946	0.108058	0.135907	0.125339	0.00143893	0.00098984	6.43e-06	2.18e-06
d__Bacteria;p__Bacteroidota;c__Bacteroidia;o__Chitinophagales;f__Chitinophagaceae;g__Aurantisolimonas	0.15488	0.189482	0.647974	0.17995	0.402558	0.138227	0.326601	0.102787	0.212916	0.12638	2.42e-14	2.45e-15	1.59e-07	2.94e-08
d__Bacteria;p__Actinobacteriota;c__Thermoleophilia;o__Solirubrobacterales;f__Solirubrobacteraceae;g__Conexibacter	0.0348252	0.0480107	0.131633	0.0420935	0.102639	0.0593943	0.0775396	0.101392	0.222656	0.0371857	0.0010938	0.000716071	3.07e-06	9.48e-07
d__Bacteria;p__Proteobacteria;c__Alphaproteobacteria;o__Caulobacterales;f__Hyphomonadaceae;g__Hirschia	0.103712	0.194176	0.1095	0.0126281	0.21221	0.173323	0.135867	0.101392	0.261769	0.083993	3.44e-09	8.93e-10	1.67e-05	6.49e-06
d__Bacteria;p__Proteobacteria;c__Alphaproteobacteria;o__Micavibrionales;f__uncultured;g__uncultured	0.213228	0.103916	0.0477608	0.0557739	0.160757	0.10259	0.0901744	0.0987563	0.173955	0.121439	0.00449093	0.00298073	0.00316562	0.00191287
d__Bacteria;p__Planctomycetota;c__Phycisphaerae;o__Tepidisphaerales;__;__	0.0349779	0.0518515	0.00931918	0.00894487	0.144628	0.123108	0.0780589	0.0965859	0.0788351	0.0813926	3.22e-07	1.23e-07	6.35e-07	1.58e-07
d__Bacteria;p__Bacteroidota;c__Bacteroidia;o__Cytophagales;f__Microscillaceae;__	0.178403	0.145739	0.1095	0.0378842	0.121967	0.269974	0.0816935	0.0934852	0.155387	0.0657902	3.03e-05	1.37e-05	3.21e-05	1.3e-05
d__Bacteria;p__Proteobacteria;c__Alphaproteobacteria;o__Acetobacterales;f__Acetobacteraceae;__	0.125248	0.180947	0.305494	0.309914	0.354571	0.182502	0.366236	0.0913147	0.194653	0.084253	2.27e-08	5.49e-09	1.23e-06	3.16e-07
d__Bacteria;p__Proteobacteria;c__Alphaproteobacteria;o__Rhizobiales;f__Devosiaceae;g__Devosia	0.224836	0.0913269	0.179685	0.102603	0.152492	0.0782925	0.078232	0.0911597	0.118709	0.0429066	3.46e-08	8.98e-09	1.39e-05	5.05e-06
d__Bacteria;p__Actinobacteriota;c__Actinobacteria;o__Micrococcales;f__Microbacteriaceae;g__Curtobacterium	0.131969	0.107971	0.115616	0.0178897	0.030925	0.010259	0.00882706	0.0908496	0.035004	0.0267841	7.56e-07	2.76e-07	1.44e-07	2.76e-08
d__Bacteria;p__Chloroflexi;c__Chloroflexia;o__Chloroflexales;f__Roseiflexaceae;__	0.0429205	0.0793776	0.00349469	0.00105234	0.0689148	0.0998904	0.0308082	0.0902295	0.151278	0.0338052	1.87e-10	3.99e-11	3.3e-08	4.5e-09
d__Bacteria;p__Actinobacteriota;c__Thermoleophilia;o__Solirubrobacterales;f__67-14;g__67-14	0.0326868	0.0693487	0.00465959	0.00105234	0.0818446	0.0356366	0.0366929	0.0900744	0.131037	0.0358855	1.95e-10	4.41e-11	9.66e-08	1.81e-08
d__Bacteria;p__Actinobacteriota;c__Actinobacteria;o__Kineosporiales;f__Kineosporiaceae;g__Kineosporia	0.0806477	0.623712	0.00524204	0.00315701	0.0862434	0.364465	0.0489815	0.0892993	0.0730518	0.0293845	3.27e-12	5.83e-13	5.85e-10	1.41e-11
d__Bacteria;p__Proteobacteria;c__Gammaproteobacteria;o__Xanthomonadales;f__Xanthomonadaceae;__	0.0809532	0.0608135	0.00757183	0	0.0234603	0.0458956	0.0205965	0.0883691	0.103186	0.0605894	4.57e-07	1.62e-07	1.02e-06	2.66e-07
d__Bacteria;p__Actinobacteriota;c__Actinobacteria;o__Propionibacteriales;f__Nocardioidaceae;g__Nocardioides	0.0742326	0.076817	0.222787	0.0941843	0.153559	0.0701932	0.155599	0.0858885	0.154931	0.0377058	1.65e-07	4.77e-08	9.96e-06	3.53e-06
d__Bacteria;p__Proteobacteria;c__Alphaproteobacteria;o__Rhizobiales;f__Xanthobacteraceae;g__Pseudorhodoplanes	0.0213839	0.0631607	0.016891	0.00263085	0.0567847	0.030777	0.0276927	0.0840281	0.135755	0.0231436	4.46e-07	1.74e-07	1.17e-08	1.27e-09
d__Bacteria;p__Verrucomicrobiota;c__Verrucomicrobiae;o__Opitutales;f__Opitutaceae;__	0.0485719	0.00853523	0.279284	0.168374	0.0478538	0.0194381	0.0789243	0.083253	0.0153713	0.0462871	2.82e-07	9.54e-08	1.66e-08	1.89e-09
d__Bacteria;p__Actinobacteriota;c__Acidimicrobiia;o__IMCC26256;f__IMCC26256;g__IMCC26256	0.043226	0.0584663	0.00524204	0.00473552	0.089176	0.0799123	0.0444814	0.0830979	0.219916	0.0208032	2.45e-08	7.39e-09	7.79e-09	6.99e-10
d__Bacteria;p__Actinobacteriota;c__Actinobacteria;o__Pseudonocardiales;f__Pseudonocardiaceae;g__Amycolatopsis	0.0786621	0.0147233	0	0.00105234	0.0447879	0.00431958	0.0256158	0.0812375	0.0995331	0.0616295	0.000160667	9.33e-05	1.47e-05	5.54e-06
d__Bacteria;p__Actinobacteriota;c__Thermoleophilia;o__Gaiellales;f__uncultured;g__uncultured	0.0500994	0.0614536	0.0247541	0.00631403	0.186483	0.0215979	0.0720011	0.0801523	0.377282	0.0345853	2.19e-08	6.32e-09	2.75e-09	1.83e-10
d__Bacteria;p__Actinobacteriota;c__Actinobacteria;o__Propionibacteriales;f__Nocardioidaceae;g__Aeromicrobium	0.222851	0.134857	0.298505	0.192052	0.225139	0.0928711	0.202157	0.078602	0.0948151	0.0481074	5.18e-05	2.75e-05	2.05e-08	2.31e-09
d__Bacteria;p__Verrucomicrobiota;c__Verrucomicrobiae;o__Opitutales;f__Opitutaceae;g__Lacunisphaera	0.0745381	0.035848	0.204731	0.124176	0.0942413	0.10637	0.103328	0.0779818	0.0722908	0.0530482	0.00333162	0.00257648	7.01e-07	1.71e-07
d__Bacteria;p__Bacteroidota;c__Bacteroidia;o__Flavobacteriales;f__Weeksellaceae;g__Chryseobacterium	0.22224	0.216795	0.228902	0.106812	0.439882	0.0869316	0.0977899	0.0773617	0.126471	0.240537	0.00024099	0.000126257	1.96e-05	7.25e-06
d__Bacteria;p__Actinobacteriota;c__Actinobacteria;o__Micrococcales;f__Micrococcaceae;g__Glutamicibacter	0	0.00128028	0.000582448	0.00210468	0.000266595	0.00323969	0	0.0761214	0.00913147	0.0327651	3.17e-06	1.33e-06	2.43e-06	7.4e-07
d__Bacteria;p__Proteobacteria;c__Alphaproteobacteria;o__Reyranellales;f__Reyranellaceae;g__Reyranella	0.0444479	0.046517	0.0495081	0.0231514	0.0819779	0.0572345	0.0392891	0.0759664	0.146256	0.0244438	0.00211742	0.00136719	0.00191396	0.00116241
d__Bacteria;p__Proteobacteria;c__Alphaproteobacteria;o__Acetobacterales;f__Acetobacteraceae;g__Acidisoma	0.11196	0.0606001	0.119111	0.0505122	0.107304	0.0712731	0.116483	0.0717805	0.0715299	0.0569488	0.00815149	0.00542267	0.00788616	0.00518276
d__Bacteria;p__Proteobacteria;c__Alphaproteobacteria;o__Caulobacterales;f__Hyphomonadaceae;g__uncultured	0.0391019	0.16473	0.00174735	0	0.115169	0.10529	0.0444814	0.0710053	0.191609	0.025744	1.99e-15	1.93e-16	1.13e-09	4.46e-11
d__Bacteria;p__Actinobacteriota;c__Actinobacteria;o__Frankiales;f__Cryptosporangiaceae;g__Cryptosporangium	0.128609	0.11864	0.00611571	0.00157851	0.0518527	0.00593943	0.0188657	0.0706953	0.0377434	0.0210633	0.000183372	9.88e-05	9.53e-05	4.35e-05
d__Bacteria;p__Verrucomicrobiota;c__Verrucomicrobiae;o__Pedosphaerales;f__Pedosphaeraceae;__	0.0181763	0.0217648	0.0771744	0.0536692	0.0514528	0.0269974	0.0666356	0.0700751	0.0260247	0.0392661	0.00128647	0.000870205	2.23e-05	8.6e-06
d__Bacteria;p__Myxococcota;c__Polyangia;o__Polyangiales;f__Phaselicystidaceae;g__Phaselicystis	0.0714832	0.046517	0.0381504	0.00578786	0.0693147	0.0372564	0.0340967	0.0666644	0.119927	0.0241837	0.000644813	0.000374528	1.58e-05	6.31e-06
d__Bacteria;p__Proteobacteria;c__Alphaproteobacteria;o__Rhodospirillales;f__Magnetospirillaceae;g__uncultured	0.0841608	0.113519	0.304038	0.797672	0.113303	0.352586	0.35239	0.064804	0.031808	0.178648	9.06e-20	3.71e-21	6.48e-10	1.61e-11
d__Bacteria;p__Verrucomicrobiota;c__Verrucomicrobiae;o__Opitutales;f__Opitutaceae;g__Opitutus	0.0552926	0.0228317	0.191334	0.247826	0.0445213	0.030777	0.0706165	0.064649	0.0354606	0.0379659	7.62e-08	2.39e-08	5.12e-09	3.87e-10
d__Bacteria;p__Proteobacteria;c__Alphaproteobacteria;o__Caulobacterales;f__Hyphomonadaceae;__	0.0326868	0.234079	0.00232979	0	0.137696	0.0593943	0.0379044	0.0640288	0.142908	0.0314649	3.64e-15	3.72e-16	9.73e-10	3.68e-11
d__Bacteria;p__Proteobacteria;c__Gammaproteobacteria;o__Cellvibrionales;f__Cellvibrionaceae;g__Cellvibrio	0.0971439	0.0128028	0.300543	0.38042	0.00906423	0.0383363	0.0515777	0.0635637	0.0375912	0.0860733	1.68e-11	3.45e-12	3.34e-10	3.05e-12
d__Bacteria;p__Proteobacteria;c__Gammaproteobacteria;o__Steroidobacterales;f__Steroidobacteraceae;__	0.00336032	0.0232585	0	0	0.0118635	0	0.00121156	0.0627886	0.0272422	0.00572088	1.04e-06	3.57e-07	2.42e-07	5.26e-08
d__Bacteria;p__Proteobacteria;c__Alphaproteobacteria;o__Rhizobiales;f__Xanthobacteraceae;g__Pseudolabrys	0.0400184	0.0919671	0.143574	0.0989198	0.158357	0.120408	0.0898283	0.0624785	0.163149	0.0426466	3.69e-05	1.58e-05	8.75e-05	3.93e-05
d__Bacteria;p__Verrucomicrobiota;c__Chlamydiae;o__Chlamydiales;f__Parachlamydiaceae;g__Neochlamydia	0.00488774	0.00853523	0.0119402	0.00368318	0.0221274	0.0399562	0.0171349	0.0624785	0.0662032	0.00806124	0.00183727	0.0012084	1.15e-05	4.28e-06
d__Bacteria;p__Verrucomicrobiota;c__Verrucomicrobiae;o__Opitutales;f__Opitutaceae;g__IMCC26134	0.0265771	0.00469437	0.103093	0.0994459	0.0150626	0.00377964	0.0263081	0.0620134	0.00760956	0.0270442	3.76e-06	1.62e-06	2.91e-08	4.05e-09
d__Bacteria;p__Actinobacteriota;c__Actinobacteria;o__Frankiales;f__Sporichthyaceae;g__uncultured	0.0444479	0.118	0.0101928	0	0.155425	0.130127	0.0837705	0.0618584	0.16254	0.0504478	7.1e-10	1.83e-10	8.53e-09	7.64e-10
d__Bacteria;p__Proteobacteria;c__Gammaproteobacteria;o__Legionellales;f__Legionellaceae;g__Legionella	0.107378	0.0228317	0.0355294	0.0163112	0.124633	0.0842319	0.0578086	0.0612382	0.12921	0.0733313	0.000211801	0.000125896	1.34e-05	4.98e-06
d__Bacteria;p__Bacteroidota;c__Bacteroidia;o__Chitinophagales;f__37-13;g__37-13	0.0294792	0.0170705	0.142409	0.0789254	0.0622499	0.0480554	0.161137	0.0609282	0.0397219	0.0634498	0.000102357	5.44e-05	7.32e-08	1.18e-08
d__Bacteria;p__Proteobacteria;c__Alphaproteobacteria;o__Rhizobiales;f__Xanthobacteraceae;g__Afipia	0.0879794	0.0219782	0.42344	0.483549	0.0583843	0.0664136	0.0295966	0.0590678	0.0480924	0.090754	3.73e-11	6.96e-12	2.07e-09	1.06e-10
d__Bacteria;p__Bdellovibrionota;c__Oligoflexia;o__Oligoflexales;f__Oligoflexales;g__Oligoflexus	0.106308	0.122694	0.343936	0.0394627	0.0945079	0.0491353	0.0533085	0.0587577	0.0799004	0.039006	0.000440695	0.000264318	0.000317595	0.000155896
d__Bacteria;p__Actinobacteriota;c__Actinobacteria;o__Corynebacteriales;f__Nocardiaceae;g__Rhodococcus	0.124485	0.0844987	0.0952303	0.0305178	0.0838441	0.030777	0.0299428	0.0584476	0.0613331	0.0221034	2.2e-05	1.01e-05	1.57e-05	6.04e-06
d__Bacteria;p__Proteobacteria;c__Alphaproteobacteria;o__Rhizobiales;f__Rhizobiales_Incertae_Sedis;g__uncultured	0.0730107	0.2695	0.0396065	0.0173636	0.392428	0.325589	0.0733857	0.0575174	0.3091	0.0421265	2.42e-08	7.55e-09	6.85e-10	1.83e-11
d__Bacteria;p__Myxococcota;c__Myxococcia;o__Myxococcales;f__Myxococcaceae;__	0.0297847	0.0275261	0.210264	0.0852394	0.164889	0.0437358	0.0704434	0.0562772	0.171976	0.0491476	0.000664311	0.000392197	2.13e-05	8.29e-06
d__Bacteria;p__Bacteroidota;c__Bacteroidia;o__Cytophagales;f__Spirosomaceae;g__Spirosoma	0.0403239	0.0303001	0.0882409	0.0242038	0.152892	0.021058	0.0427506	0.0536416	0.0774653	0.013002	8.73e-06	4e-06	6.91e-07	1.68e-07
d__Bacteria;p__Bdellovibrionota;c__Bdellovibrionia;o__Bacteriovoracales;f__Bacteriovoracaceae;g__Peredibacter	0.0766765	0.0477973	0.081834	0.0231514	0.172354	0.0372564	0.0699241	0.0519362	0.0400263	0.0288645	9.72e-05	4.93e-05	1.27e-07	2.45e-08
d__Bacteria;p__Verrucomicrobiota;c__Chlamydiae;o__Chlamydiales;f__Parachlamydiaceae;g__Candidatus_Protochlamydia	0.00885903	0.0055479	0.00203857	0	0.00839774	0.0172783	0.0214619	0.051161	0.0168932	0.00832128	0.000136938	6.91e-05	3.13e-05	1.36e-05
d__Bacteria;p__Bacteroidota;c__Bacteroidia;o__Chitinophagales;f__Chitinophagaceae;g__Dinghuibacter	0.00336032	0.0294465	0	0	0.0135963	0.00809922	0.00155772	0.0497657	0.0468749	0.0660502	0.000194687	0.000123575	1e-06	2.66e-07
d__Bacteria;p__Proteobacteria;c__Gammaproteobacteria;o__Xanthomonadales;f__Xanthomonadaceae;g__Stenotrophomonas	0.541928	0.0798044	0.200654	0.181528	0.0655823	0.0367165	0.0183464	0.0493006	0.0368303	0.0741114	1.02e-09	2.37e-10	1.2e-07	2.16e-08
d__Bacteria;p__Firmicutes;c__Bacilli;o__Bacillales;f__Bacillaceae;g__Bacillus	0.00595694	0.00512114	0.000582448	0	0.0297253	0.00215979	0.0145387	0.0488355	0.123275	0.0275643	6.74e-07	2.43e-07	7.6e-09	7.51e-10
d__Bacteria;p__Actinobacteriota;c__Thermoleophilia;o__Solirubrobacterales;f__Solirubrobacteraceae;__	0.01894	0.0232585	0.0495081	0.0178897	0.0837108	0.0874716	0.0657702	0.0480604	0.153865	0.0189829	0.000114801	6.11e-05	2.05e-06	6.15e-07
d__Bacteria;p__Proteobacteria;c__Alphaproteobacteria;o__Rhizobiales;f__Xanthobacteraceae;g__uncultured	0.0152742	0.0379818	0.00407714	0	0.0607836	0.0291572	0.0136733	0.0468201	0.128602	0.013002	4.4e-06	1.94e-06	5.76e-08	1.03e-08
d__Bacteria;p__Spirochaetota;c__Spirochaetia;o__Spirochaetales;f__Spirochaetaceae;g__Spirochaeta_2	0.0149687	0.01515	0.0270839	0.077873	0.0537189	0.161444	0.0270004	0.04651	0.0251116	0.0340653	0.000346172	0.000205835	1.16e-05	4.33e-06
d__Bacteria;p__Bacteroidota;c__Bacteroidia;o__Chitinophagales;f__Chitinophagaceae;g__Sediminibacterium	0.0265771	0.0452367	0.113577	0.0541954	0.197413	0.182502	0.269485	0.0446496	0.0741171	0.103236	2.23e-05	1.09e-05	1.17e-08	1.22e-09
d__Bacteria;p__Proteobacteria;c__Gammaproteobacteria;o__Enterobacterales;f__Yersiniaceae;g__Rahnella1	0.0672065	0.0648677	0.00902795	0.0347272	0.0693147	0.0350966	0.00103848	0.0443396	0.00228287	0.109217	1.55e-06	5.44e-07	7.63e-06	2.55e-06
d__Bacteria;p__Actinobacteriota;c__Actinobacteria;o__Micrococcales;f__Microbacteriaceae;g__Subtercola	0.052696	0.0102423	0.113577	0.0931319	0.0189282	0.0345567	0.0559047	0.0441845	0.00334821	0.0106616	1.8e-06	7.56e-07	2.64e-08	3.51e-09
d__Bacteria;p__Actinobacteriota;c__Actinobacteria;o__Micromonosporales;f__Micromonosporaceae;__	0.0566673	0.122694	0.000582448	0	0.047054	0.0372564	0.0117694	0.0440295	0.0800526	0.0273042	9.41e-09	2.41e-09	3.33e-08	4.67e-09
d__Bacteria;p__Proteobacteria;c__Gammaproteobacteria;o__Burkholderiales;f__Oxalobacteraceae;g__Massilia	0.0103865	0.0341409	0.0314522	0.037358	0.0617167	0.151185	0.0295966	0.0438745	0.0470271	0.114938	2.84e-05	1.28e-05	2.42e-05	9.25e-06
d__Bacteria;p__Verrucomicrobiota;c__Chlamydiae;o__Chlamydiales;f__Parachlamydiaceae;__	0.0125248	0.00405423	0.0215506	0.0926057	0.0658489	0.0475154	0.019558	0.0435644	0.0479402	0.0135221	3.47e-06	1.36e-06	1.48e-05	5.85e-06
d__Bacteria;p__Planctomycetota;c__Phycisphaerae;o__Tepidisphaerales;f__Tepidisphaeraceae;g__Tepidisphaeraceae	0.0543761	0.0729762	0.0582448	0.034201	0.115036	0.0658737	0.0417122	0.041549	0.0730518	0.0267841	0.00247157	0.00150591	0.000935249	0.00053027
d__Bacteria;p__Verrucomicrobiota;c__Verrucomicrobiae;o__Chthoniobacterales;f__Terrimicrobiaceae;g__Terrimicrobium	0.0365053	0.017924	0.02854	0.00526169	0.172354	0.0221379	0.0493277	0.041549	0.0464183	0.0184629	2.6e-05	1.31e-05	2.55e-07	6.22e-08
d__Bacteria;p__Proteobacteria;c__Alphaproteobacteria;o__Elsterales;f__Elsteraceae;g__Elsteraceae	0.032534	0.0185641	0.0366943	0.0794515	0.0383897	0.0491353	0.0678472	0.0413939	0.02709	0.0431667	0.0103255	0.0081171	2.7e-05	1.08e-05
d__Bacteria;p__Proteobacteria;c__Alphaproteobacteria;o__Sphingomonadales;f__Sphingomonadaceae;g__uncultured	0.0258134	0.0335008	0.0128139	0.00315701	0.0477205	0.0534549	0.0102117	0.0413939	0.0251116	0.0153424	0.00203572	0.00130098	0.000128837	6.17e-05
d__Bacteria;p__Chloroflexi;c__KD4-96;o__KD4-96;f__KD4-96;g__KD4-96	0.0138995	0.0215514	0	0	0.0262596	0.00269974	0.00900014	0.0406188	0.138037	0.0124819	2.49e-07	7.77e-08	1.42e-08	1.75e-09
d__Bacteria;p__Proteobacteria;c__Alphaproteobacteria;o__Rhizobiales;f__Devosiaceae;g__Arsenicitalea	0.0413931	0.0160036	0.0832901	0.0357795	0.0215942	0.0356366	0.0373852	0.0387584	0.0164367	0.0179428	0.0125392	0.00875488	0.00187109	0.00106889
d__Bacteria;p__Proteobacteria;c__Gammaproteobacteria;__;__;__	0.00809532	0.0279529	0.0407714	0.0126281	0.0765127	0.0442757	0.0235388	0.037053	0.0808136	0.0241837	0.00126823	0.000779565	0.000723613	0.000390982
d__Bacteria;p__Bacteroidota;c__Bacteroidia;o__Cytophagales;f__Microscillaceae;g__OLB12	0.0177181	0.00277395	0.00232979	0	0.0179952	0.0188982	0.0417122	0.036898	0.0258725	0.0226235	8.51e-05	4.13e-05	1.13e-05	4.11e-06
d__Bacteria;p__Proteobacteria;c__Alphaproteobacteria;o__Elsterales;f__Elsteraceae;g__Aliidongia	0.00794258	0.00853523	0.14998	0.632455	0.0274593	0.0156585	0.05002	0.0362778	0.0109578	0.0280843	3.14e-08	9.61e-09	6.76e-09	5.4e-10
d__Bacteria;p__Actinobacteriota;c__Actinobacteria;o__Micrococcales;f__Microbacteriaceae;g__Frondihabitans	0.000152742	0.0113092	0.00349469	0.00526169	0.00319914	0	0	0.0358127	0.000760956	0.00312048	0.0127388	0.00994533	0.00484074	0.00315951
d__Bacteria;p__Myxococcota;c__Myxococcia;o__Myxococcales;__;__	0.000916452	0.0102423	0.122605	0.0673496	0.0806449	0.0296971	0.078232	0.0353476	0.0391132	0.0343253	2.32e-07	7.63e-08	4.83e-07	1.13e-07
d__Bacteria;p__Proteobacteria;c__Alphaproteobacteria;o__Elsterales;f__Elsteraceae;__	0.043226	0.00938875	0.117946	0.24309	0.0314582	0.0410361	0.0292504	0.0347275	0.0126319	0.0247038	2.29e-05	1.06e-05	1.26e-06	3.27e-07
d__Bacteria;p__Actinobacteriota;c__Actinobacteria;o__Frankiales;f__Nakamurellaceae;g__Nakamurella	0.0229113	0.0247522	0.0611571	0.00420935	0.0537189	0.0134987	0.0180003	0.0347275	0.0713777	0.0104016	0.000302474	0.000173281	6.02e-06	2.2e-06
d__Bacteria;p__Myxococcota;c__Myxococcia;o__Myxococcales;f__Myxococcaceae;g__Archangium	0	0	0	0	0	0	0	0.0345725	0.0529626	0	0.00584472	0.00398363	0.0066984	0.00454856
d__Bacteria;p__Proteobacteria;c__Alphaproteobacteria;o__Rickettsiales;f__SM2D12;g__SM2D12	0.0430732	0.0714825	0.0693114	0.0957628	0.115302	0.10313	0.0988284	0.0342624	0.0762478	0.109997	0.00330194	0.00244093	9.08e-05	4.09e-05
d__Bacteria;p__Cyanobacteria;c__Vampirivibrionia;o__Obscuribacterales;f__Obscuribacteraceae;g__Candidatus_Obscuribacter	0.00626242	0.0160036	0.0101928	0.0126281	0.0151959	0.0566945	0.0366929	0.0342624	0.0456574	0.0345853	0.000132319	7.93e-05	5.18e-06	2.02e-06
d__Bacteria;p__Verrucomicrobiota;c__Verrucomicrobiae;o__Verrucomicrobiales;f__Verrucomicrobiaceae;g__Prosthecobacter	0.0132885	0.0145099	0.0343645	0.0110495	0.0671819	0.010259	0.0114233	0.0341074	0.0302861	0.0218434	0.0045374	0.00297084	0.000205694	0.000103296
d__Bacteria;p__Proteobacteria;c__Gammaproteobacteria;o__Xanthomonadales;f__Rhodanobacteraceae;g__Dokdonella	0.00809532	0.0145099	0.00262102	0.00157851	0.0293254	0.030777	0.00969245	0.0333322	0.0480924	0.00936145	0.000729566	0.000460262	0.000140459	6.93e-05
d__Bacteria;p__Actinobacteriota;c__Actinobacteria;o__Micrococcales;f__Microbacteriaceae;g__Cryobacterium	0.0389492	0.0480107	0.0707675	0.00105234	0.0141295	0.00593943	0.00225003	0.0328671	0.0156757	0.00416064	3.18e-05	1.39e-05	4.59e-06	1.51e-06
d__Bacteria;p__Actinobacteriota;c__Acidimicrobiia;o__Microtrichales;f__Ilumatobacteraceae;g__CL500-29_marine_group	0.0181763	0.0300867	0.0151437	0.00105234	0.0347906	0.0377964	0.0235388	0.0327121	0.0610287	0.0101416	0.00687539	0.00559123	0.00113326	0.000654201
d__Bacteria;p__Actinobacteriota;c__Actinobacteria;o__Frankiales;f__Sporichthyaceae;g__Longivirga	0.0245915	0.0345677	0.00931918	0.00526169	0.042122	0.0280773	0.0252696	0.032247	0.0473315	0.00884137	0.00157279	0.00100441	0.00345907	0.00225102
d__Bacteria;p__Proteobacteria;c__Alphaproteobacteria;o__uncultured;f__uncultured;g__uncultured	0.0174126	0.0215514	0.0084455	0.0068402	0.0307917	0.0588543	0.0401545	0.0303866	0.0584414	0.0241837	0.00356485	0.0025052	0.000466945	0.000263474
d__Bacteria;p__Proteobacteria;c__Alphaproteobacteria;o__Rhizobiales;f__Methyloligellaceae;g__uncultured	0.0187873	0.0170705	0	0	0.0257264	0.00377964	0.00951938	0.0293013	0.079596	0.00936145	2.64e-05	1.36e-05	2.21e-07	4.87e-08
d__Bacteria;p__Myxococcota;c__Polyangia;o__Polyangiales;f__Sandaracinaceae;g__Sandaracinus	0.00840081	0.00512114	0.000582448	0.00105234	0.0126633	0.0145786	0.00294235	0.0288362	0.0348518	0.00598092	0.0169872	0.0131248	0.00247892	0.00151509
d__Bacteria;p__Proteobacteria;c__Alphaproteobacteria;o__Micavibrionales;__;__	0.0433787	0.0497177	0.0352381	0.0862917	0.063183	0.0637139	0.0865398	0.0286812	0.0436789	0.083993	1.25e-06	4.51e-07	1.26e-05	4.62e-06
d__Bacteria;p__Planctomycetota;c__vadinHA49;o__vadinHA49;f__vadinHA49;g__vadinHA49	0.00870629	0.00469437	0.0136875	0.00263085	0.0195947	0.00269974	0.0150579	0.0286812	0.00943586	0.0104016	0.0226906	0.0175381	0.00333095	0.00210236
d__Bacteria;p__Proteobacteria;c__Gammaproteobacteria;o__Xanthomonadales;f__Rhodanobacteraceae;g__Luteibacter	0.0947	0.0586797	0.0783393	0.0247299	0.095441	0.129588	0.0176541	0.0280611	0	0.0600693	4.75e-05	2.23e-05	0.000222292	0.000106015
d__Bacteria;p__Proteobacteria;c__Gammaproteobacteria;o__Xanthomonadales;f__Rhodanobacteraceae;g__Rhodanobacter	0.0065679	0.0076817	0	0	0.0143961	0.000539948	0.0171349	0.0268208	0.0173498	0.0226235	0.00271017	0.00176298	0.000971073	0.000562239
d__Bacteria;p__Proteobacteria;c__Alphaproteobacteria;o__Acetobacterales;f__Acetobacteraceae;g__Endobacter	0.0381855	0.05996	0.264432	0.134699	0.152359	0.383903	0.123925	0.0263557	0.102881	0.0312048	0.000366558	0.0002433	5.6e-05	2.36e-05
d__Bacteria;p__Bacteroidota;c__Bacteroidia;o__Sphingobacteriales;f__KD3-93;g__KD3-93	0.0155797	0.0117359	0.0920269	0.132595	0.0178619	0.0259175	0.0360005	0.0260456	0.0165888	0.0197631	5.16e-05	2.48e-05	7.96e-07	2.03e-07
d__Bacteria;p__Proteobacteria;c__Alphaproteobacteria;o__Rhizobiales;f__Devosiaceae;g__uncultured	0.0439897	0.0753234	0.0323259	0.0084187	0.0542521	0.0647938	0.0249235	0.0257356	0.0398741	0.00910141	8.94e-06	3.71e-06	1.11e-05	4.07e-06
d__Bacteria;p__Chloroflexi;c__Chloroflexia;o__Thermomicrobiales;f__JG30-KF-CM45;g__JG30-KF-CM45	0.00717887	0.0219782	0.0157261	0.00157851	0.0219941	0.0140386	0.00969245	0.0251154	0.0721387	0.00468072	5.73e-05	2.65e-05	3.32e-05	1.5e-05
d__Bacteria;p__Actinobacteriota;c__Actinobacteria;o__Micrococcales;f__Demequinaceae;g__Demequina	0.0259661	0.0445966	0.000582448	0	0.0171954	0.010259	0.00692318	0.0244953	0.0770088	0.0101416	1.66e-07	5.39e-08	5.07e-09	4.47e-10
d__Bacteria;p__Proteobacteria;c__Alphaproteobacteria;o__Rhizobiales;f__Beijerinckiaceae;g__Methylovirgula	0.06629	0.0251789	0.0451398	0.0484075	0.0333244	0.0491353	0.0993477	0.0243403	0.0235896	0.0156024	0.00638184	0.00507255	0.000156135	7.22e-05
d__Bacteria;p__Planctomycetota;c__Phycisphaerae;o__Phycisphaerales;f__Phycisphaeraceae;g__SM1A02	0.0123721	0.0104557	0.0218418	0.00368318	0.0186616	0.0361765	0.0306351	0.0243403	0.0216112	0.0111817	0.0878574	0.0750294	0.0248738	0.0189443
d__Bacteria;p__Proteobacteria;c__Alphaproteobacteria;o__Rhizobiales;f__A0839;g__A0839	0.00549871	0.0183507	0	0	0.0213276	0.0167384	0.0076155	0.0241852	0.0386566	0.00572088	0.00250864	0.00158792	0.000554332	0.000303711
d__Bacteria;p__Dependentiae;c__Babeliae;o__Babeliales;f__Vermiphilaceae;g__Vermiphilaceae	0.0113029	0.0213381	0.0110665	0.0499861	0.040789	0.0194381	0.0121156	0.0240302	0.0395697	0.013002	0.0161036	0.0114796	0.00203525	0.00122056
d__Bacteria;p__Acidobacteriota;c__Thermoanaerobaculia;o__Thermoanaerobaculales;f__Thermoanaerobaculaceae;g__Subgroup_10	0.0190927	0.0136564	0	0	0.025993	0.021058	0.00536547	0.0240302	0.0531147	0.0026004	0.000600512	0.000358785	3.58e-05	1.52e-05
d__Bacteria;p__Proteobacteria;c__Alphaproteobacteria;o__Rhizobiales;f__Devosiaceae;__	0.0106919	0.0211247	0.0273751	0.0289393	0.0363902	0.0286172	0.017308	0.0237201	0.0263291	0.00702108	0.0401833	0.0310785	0.0123091	0.00882356
d__Bacteria;p__Gemmatimonadota;c__Gemmatimonadetes;o__Gemmatimonadales;f__Gemmatimonadaceae;g__uncultured	0.00351306	0.00896199	0	0	0.00719806	0	0.00328851	0.0237201	0.0158279	0.00182028	0.0157671	0.0123505	0.00265556	0.00164544
d__Bacteria;p__Proteobacteria;c__Alphaproteobacteria;o__Rhizobiales;f__Hyphomicrobiaceae;__	0.0204674	0.0230451	0.000582448	0	0.0274593	0.00593943	0.0143656	0.0235651	0.0560064	0.0111817	9.67e-05	4.94e-05	3.09e-05	1.4e-05
d__Bacteria;p__Actinobacteriota;c__Actinobacteria;o__Frankiales;f__uncultured;g__uncultured	0.00519323	0.00213381	0	0	0.00453211	0	0.00294235	0.0234101	0.0138494	0	0.00315828	0.00202741	0.000167406	8.13e-05
d__Bacteria;p__Proteobacteria;c__Gammaproteobacteria;o__Burkholderiales;f__Comamonadaceae;g__Pelomonas	0.00641516	0.0119493	0.0544589	0.0499861	0.0102639	0.0232178	0.00450007	0.0223248	0.0165888	0.0148223	0.00632672	0.00494152	0.00028101	0.000141783
d__Bacteria;p__Actinobacteriota;c__Actinobacteria;o__Micrococcales;f__Micrococcaceae;g__Arthrobacter	0.00076371	0.0672149	0	0	0.0103972	0	0.00138464	0.0217047	0.0016741	0.00364056	0.00140627	0.000998509	0.000202133	0.000101691
d__Bacteria;p__Myxococcota;c__Polyangia;o__Polyangiales;f__Polyangiaceae;g__Labilithrix	0.00351306	0.00320071	0.00291224	0.00315701	0.00773125	0.0610141	0.00017308	0.0206195	0.0155235	0.00286044	0.021126	0.0160809	0.00625776	0.00414092
d__Bacteria;p__Bacteroidota;c__Bacteroidia;o__Cytophagales;f__Cytophagaceae;__	0.00106919	0.00277395	0.00262102	0	0.00386563	0.0113389	0.00865398	0.0206195	0.0136972	0.00312048	0.085407	0.0724503	0.0452653	0.0360688
d__Bacteria;p__Proteobacteria;c__Gammaproteobacteria;o__Burkholderiales;f__Burkholderiaceae;g__Cupriavidus	0.0186345	0.00938875	0.112704	0.0478814	0.0307917	0.115549	0.0076155	0.0204644	0.0141538	0.0247038	0.00198403	0.0011754	0.000438717	0.000221804
d__Bacteria;p__Acidobacteriota;c__Acidobacteriae;o__Acidobacteriales;f__Acidobacteriaceae_(Subgroup_1);__	0.0160379	0.0204845	0.148233	0.208363	0.0935748	0.0701932	0.139502	0.0203094	0.0315036	0.0473273	8.61e-09	2.34e-09	1.09e-09	4.3e-11
d__Bacteria;p__Proteobacteria;c__Alphaproteobacteria;o__Rhizobiales;f__Beijerinckiaceae;g__1174-901-12	0.0145105	0.0136564	0.073971	0.0363057	0.0353238	0.041576	0.0351351	0.0198443	0.0321124	0.0145622	0.0152547	0.0112757	0.000175231	8.37e-05
d__Bacteria;p__Bacteroidota;c__Bacteroidia;o__Flavobacteriales;f__Flavobacteriaceae;__	0.133649	0.0900466	0.00436836	0.00999721	0.10997	0.0199781	0.043443	0.0198443	0.0607243	0.0975151	1.79e-07	5.68e-08	4.03e-08	5.68e-09
d__Bacteria;p__Proteobacteria;c__Alphaproteobacteria;o__Rhizobiales;f__Rhizobiales_Incertae_Sedis;g__Nordella	0.00320758	0.0162169	0	0	0.00906423	0.0161984	0.00519239	0.0198443	0.0418526	0.00364056	0.00166327	0.00110295	3.33e-05	1.37e-05
d__Bacteria;p__Actinobacteriota;c__Acidimicrobiia;o__Microtrichales;__;__	0.00931726	0.00874861	0.00174735	0	0.0149293	0.00863917	0.00640394	0.0198443	0.0269379	0.00468072	0.0158603	0.0118739	0.00760189	0.00532307
d__Bacteria;p__Proteobacteria;c__Alphaproteobacteria;o__Rhizobiales;f__Xanthobacteraceae;g__Ancylobacter	0.0397129	0.0066148	0.0189296	0.00473552	0.0342574	0.0113389	0.0237119	0.0193792	0.0222199	0.00754116	1.72e-05	7.8e-06	3.71e-06	1.22e-06
d__Bacteria;p__Myxococcota;c__Myxococcia;o__Myxococcales;f__Myxococcaceae;g__P3OB-42	0.00870629	0.0164303	0.00786305	0.00105234	0.0321247	0.0383363	0.00709626	0.0187591	0.06529	0.0104016	0.010607	0.00781739	0.000992253	0.000571525
d__Bacteria;p__Proteobacteria;c__Gammaproteobacteria;o__Burkholderiales;f__Oxalobacteraceae;g__Herbaspirillum	0.00931726	0.0921805	0.121441	0.0484075	0.0771792	0.0858517	0.156464	0.018604	0.0251116	0.0540884	0.00272118	0.0017219	0.00138272	0.0007648
d__Bacteria;p__Actinobacteriota;c__Thermoleophilia;o__Solirubrobacterales;f__Solirubrobacteraceae;g__Solirubrobacter	0.0261189	0.0219782	0.01427	0.00315701	0.0551851	0.0145786	0.0128079	0.018604	0.0704645	0.0122219	0.00364193	0.00239842	0.00161136	0.000968085
d__Bacteria;p__Proteobacteria;c__Alphaproteobacteria;o__Rhizobiales;f__Rhizobiales_Incertae_Sedis;g__Bauldia	0.0180235	0.0181374	0.00203857	0	0.0275926	0.031317	0.0150579	0.0179839	0.0470271	0.00546084	0.00110393	0.000675288	0.000224765	0.000113129
d__Bacteria;p__Acidobacteriota;c__Acidobacteriae;o__Acidobacteriales;f__Acidobacteriaceae_(Subgroup_1);g__Acidipila	0.0238277	0.024112	0.0859112	0.10576	0.0541188	0.0388763	0.0540008	0.0178288	0.0560064	0.0249639	0.000127758	6.61e-05	1.44e-06	3.98e-07
d__Bacteria;p__Acidobacteriota;c__Acidobacteriae;o__Acidobacteriales;f__Acidobacteriaceae_(Subgroup_1);g__Acidicapsa	0.0137468	0.0211247	0.0349469	0.0126281	0.0330578	0.0269974	0.0290774	0.0176738	0.0120231	0.0153424	0.0207516	0.0150377	0.00668794	0.00436353
d__Bacteria;p__Myxococcota;c__Polyangia;o__Polyangiales;f__Sandaracinaceae;g__uncultured	0.00824807	0.0305134	0.00232979	0	0.0871765	0.0275374	0.028212	0.0175188	0.12571	0.0213233	3.96e-06	1.74e-06	2.51e-08	3.24e-09
d__Bacteria;p__Proteobacteria;c__Gammaproteobacteria;o__Xanthomonadales;f__Xanthomonadaceae;g__Arenimonas	0.0401711	0.0495043	0	0	0.0186616	0.0140386	0.00501931	0.0173637	0.0560064	0.00546084	9.74e-05	5.12e-05	4.08e-07	9.38e-08
d__Bacteria;p__Actinobacteriota;c__Actinobacteria;o__Micrococcales;f__Microbacteriaceae;g__Gryllotalpicola	0.00855355	0.0253923	0.218127	0.077873	0.0462542	0.0280773	0.0512315	0.0172087	0.0738128	0.0169026	3.77e-05	1.91e-05	2.61e-06	7.71e-07
d__Bacteria;p__Proteobacteria;c__Alphaproteobacteria;o__Acetobacterales;f__Acetobacteraceae;g__Roseococcus	0.0380327	0.0142965	0.0495081	0.0236776	0.0389229	0.0199781	0.0315005	0.0167436	0.0178064	0.013262	0.00502691	0.0035043	1.34e-05	5.03e-06
d__Bacteria;p__Cyanobacteria;c__Sericytochromatia;o__Sericytochromatia;f__Sericytochromatia;g__Sericytochromatia	0	0.00490776	0.00611571	0	0.00359903	0	0	0.0167436	0.00319602	0.0013002	0.0232214	0.0183462	0.0041449	0.00271505
d__Bacteria;p__Verrucomicrobiota;c__Verrucomicrobiae;o__Chthoniobacterales;f__Xiphinematobacteraceae;g__Candidatus_Xiphinematobacter	0.0271881	0.033074	0.0314522	0.00894487	0.0665154	0.0253776	0.0399814	0.0159684	0.0401785	0.00702108	0.000227016	0.000126059	1.56e-05	6.06e-06
d__Bacteria;p__Proteobacteria;c__Alphaproteobacteria;o__Rhizobiales;f__Xanthobacteraceae;g__Tardiphaga	0	0.0155768	0.172987	0.0357795	0.0105305	0.000539948	0	0.0156584	0.0193283	0.0267841	1.28e-07	4.01e-08	7.73e-07	2.04e-07
d__Bacteria;p__Proteobacteria;c__Alphaproteobacteria;o__Elsterales;f__Elsteraceae;g__Lacibacterium	0.126776	0.033074	0.0165998	0.00420935	0.0159957	0.0329368	0.012981	0.0155033	0.0117187	0.0109217	0.0025258	0.0015746	0.000272475	0.000135041
d__Bacteria;p__Dependentiae;c__Babeliae;o__Babeliales;f__Babeliaceae;g__Babeliaceae	0.00168016	0.000426761	0	0	0.00186616	0.0010799	0.00553855	0.0155033	0.0366781	0.0106616	0.0001323	6.96e-05	4.72e-06	1.66e-06
d__Bacteria;p__Proteobacteria;c__Gammaproteobacteria;o__Xanthomonadales;f__Xanthomonadaceae;g__Pseudoxanthomonas	0.00213839	0	0.00145612	0.00105234	0.000666487	0	0.000692318	0.0153483	0.00334821	0	0.0698466	0.0601909	0.0409391	0.0333077
d__Bacteria;p__Bacteroidota;c__Bacteroidia;o__Chitinophagales;f__Chitinophagaceae;g__uncultured	0.0171071	0.0275261	0.00291224	0	0.0357237	0.00539948	0.0164426	0.0153483	0.0544845	0.0122219	0.000267235	0.000161114	7.33e-05	3.42e-05
d__Bacteria;p__Proteobacteria;c__Alphaproteobacteria;o__Rhizobiales;f__Rhizobiaceae;g__Shinella	0.00901177	0.0130162	0.0101928	0.00420935	0	0.00269974	0.00138464	0.0151933	0.00243506	0	0.0246587	0.0196649	0.0140011	0.0104237
d__Bacteria;p__Proteobacteria;c__Alphaproteobacteria;o__Rhizobiales;f__Hyphomicrobiaceae;g__uncultured	0.00610968	0.0119493	0	0	0.00546519	0.00485953	0.00138464	0.0150382	0.0362215	0.0039006	0.001396	0.000827358	0.000162829	7.91e-05
d__Bacteria;p__Proteobacteria;c__Alphaproteobacteria;o__Rhizobiales;f__Beijerinckiaceae;g__Roseiarcus	0.00931726	0.0157902	0.00524204	0.00631403	0.0881096	0.0151185	0.0488084	0.0148832	0.0340908	0.00962149	0.000504551	0.000271913	2.81e-06	8.33e-07
d__Bacteria;p__Bacteroidota;c__Bacteroidia;o__Cytophagales;f__Amoebophilaceae;g__Candidatus_Amoebophilus	0.023675	0.00789508	0.00902795	0.00105234	0.0190615	0.0350966	0.0225003	0.0147282	0.0112622	0.0265241	0.0198524	0.0153181	0.00071953	0.000402113
d__Bacteria;p__Chloroflexi;c__TK10;o__TK10;f__TK10;g__TK10	0.00610968	0.00917537	0.000582448	0.00157851	0.01253	0.0183582	0.00207695	0.0145731	0.0283076	0.0052008	0.012409	0.00951462	0.00245672	0.00151087
d__Bacteria;p__Verrucomicrobiota;c__Verrucomicrobiae;o__Verrucomicrobiales;f__Verrucomicrobiaceae;g__Verrucomicrobium	0.0418513	0.0279529	0.0128139	0	0.0697146	0.00701932	0.0299428	0.0142631	0.0403307	0.0169026	3.88e-05	1.88e-05	3.68e-06	1.21e-06
d__Bacteria;p__Proteobacteria;c__Alphaproteobacteria;o__Ferrovibrionales;f__Ferrovibrionaceae;g__Ferrovibrio	0.0253552	0.0104557	0.00815428	0	0.00879763	0.0199781	0.0135002	0.013798	0.00882709	0.00364056	0.020313	0.0152769	0.00182634	0.00108841
d__Bacteria;p__Proteobacteria;c__Gammaproteobacteria;o__JG36-TzT-191;f__JG36-TzT-191;g__JG36-TzT-191	0.0134413	0.00810847	0	0	0.0117302	0.0010799	0.00225003	0.0136429	0.0280032	0.00208032	0.0134792	0.0096706	0.00243496	0.00154336
d__Bacteria;p__Actinobacteriota;c__Actinobacteria;o__PeM15;f__PeM15;g__PeM15	0.00717887	0.0253923	0.00640693	0	0.0378565	0.0232178	0.0115963	0.0130228	0.0401785	0.00286044	0.000615241	0.000380084	2.6e-05	1.08e-05
d__Bacteria;p__Proteobacteria;c__Alphaproteobacteria;o__Sphingomonadales;f__Sphingomonadaceae;g__Plot4-2H12	0.00580419	0.00682818	0.00320347	0	0.0163956	0.00539948	0.00951938	0.0128678	0.0194805	0.00208032	0.0340569	0.0270372	0.0279141	0.0221394
d__Bacteria;p__Dependentiae;c__Babeliae;o__Babeliales;f__Babeliales;g__Babeliales	0	0.00384085	0	0	0.000266595	0	0	0.0128678	0.00958805	0.006501	0.000886155	0.000642058	1.73e-05	7.13e-06
d__Bacteria;p__Actinobacteriota;c__Actinobacteria;o__Corynebacteriales;f__Nocardiaceae;g__Nocardia	0.0329923	0.0136564	0.00728061	0.00263085	0.038523	0.00647938	0.0112502	0.0127127	0.0276988	0.00338052	0.0270769	0.0213512	0.0030299	0.00185465
d__Bacteria;p__Bacteroidota;c__Bacteroidia;o__Cytophagales;__;__	0.0111502	0.00448099	0.00698938	0	0.0114636	0.00863917	0.0247504	0.0127127	0.0138494	0.0241837	0.00338787	0.00224837	4.08e-05	1.81e-05
d__Bacteria;p__Acidobacteriota;c__Vicinamibacteria;o__Vicinamibacterales;f__uncultured;g__uncultured	0.00381855	0.0145099	0	0	0.0126633	0.0010799	0.000865398	0.0127127	0.0622462	0.0026004	4.63e-05	2.13e-05	2.51e-06	7.88e-07
d__Bacteria;p__Actinobacteriota;c__Actinobacteria;o__Frankiales;f__Frankiales;g__Frankiales	0.00351306	0.000640142	0	0	0.00479871	0.00161984	0.00484623	0.0125577	0.00197849	0	0.0145871	0.0109401	0.00195454	0.00117847
d__Bacteria;p__Proteobacteria;c__Alphaproteobacteria;o__Rhodospirillales;f__uncultured;g__uncultured	0.029021	0.0211247	0.039024	0.0547216	0.0502531	0.0350966	0.0531354	0.0124027	0.023894	0.0473273	0.0024878	0.00159455	5.27e-05	2.27e-05
d__Bacteria;p__Planctomycetota;c__Phycisphaerae;o__Tepidisphaerales;f__Tepidisphaeraceae;g__Tepidisphaera	0.0117611	0.00384085	0.00640693	0.00736637	0.0301252	0.0377964	0.0107309	0.0124027	0.0162845	0.019503	0.0239003	0.0180715	0.014278	0.0103386
d__Bacteria;p__Proteobacteria;c__Gammaproteobacteria;o__Burkholderiales;f__Nitrosomonadaceae;g__IS-44	0.010081	0.00938875	0.00611571	0.00105234	0.0181285	0.0172783	0.00363467	0.0122476	0.0365259	0.00598092	0.0713831	0.0589045	0.0321499	0.0250182
d__Bacteria;p__Actinobacteriota;c__Actinobacteria;__;__;__	0.0207729	0.00576128	0.0157261	0.00473552	0.0343907	0.00431958	0.015231	0.0120926	0.00730518	0.00572088	0.00540459	0.00369875	0.000951047	0.000531412
d__Bacteria;p__Proteobacteria;c__Alphaproteobacteria;o__Rhizobiales;f__Methylopilaceae;g__Hansschlegelia	0.0120666	0.00320071	0.0084455	0.00105234	0.0262596	0.00593943	0.000519239	0.0120926	0.00532669	0.00806124	0.0033777	0.00218828	0.000611692	0.000337548
d__Bacteria;p__Proteobacteria;c__Gammaproteobacteria;o__Burkholderiales;f__Nitrosomonadaceae;__	0.00366581	0.01515	0.000582448	0	0.00719806	0.00215979	0	0.0120926	0.0436789	0.00442068	0.000477428	0.000310499	2.34e-05	9.86e-06
d__Bacteria;p__Cyanobacteria;c__Vampirivibrionia;o__Vampirovibrionales;f__Vampirovibrionaceae;g__Vampirovibrionaceae	0.00259661	0.0189909	0.0850375	0.33096	0.0226606	0.0232178	0.0353082	0.0117825	0.0153713	0.0215833	2.11e-09	4.95e-10	1.01e-08	9.83e-10
d__Bacteria;p__Verrucomicrobiota;c__Verrucomicrobiae;o__Verrucomicrobiales;f__Verrucomicrobiaceae;__	0.00137468	0.00405423	0.0317434	0.0252561	0.013463	0.00485953	0.00467315	0.0116275	0.00334821	0.00442068	0.0092231	0.00705101	0.000904953	0.000504691
d__Bacteria;p__Proteobacteria;c__Gammaproteobacteria;o__Enterobacterales;__;__	0.0696503	0.578688	0.016891	0.00789254	0.0347906	0.0264575	0.0813474	0.0116275	0.00334821	0.122219	8.02e-08	2.32e-08	1.99e-07	3.81e-08
d__Bacteria;p__Proteobacteria;c__Gammaproteobacteria;o__Burkholderiales;f__TRA3-20;g__TRA3-20	0.0111502	0.00192043	0.0107753	0.00420935	0.0202612	0.00647938	0.0110771	0.0116275	0.00760956	0.0039006	0.0496495	0.0416189	0.0206407	0.015465
d__Bacteria;p__Proteobacteria;c__Gammaproteobacteria;o__Salinisphaerales;f__Solimonadaceae;g__Hydrocarboniphaga	0.0413931	0.00746832	0.04281	0.0115757	0.0257264	0.00539948	0.0143656	0.0111624	0.00776175	0.00910141	0.00109218	0.000647393	0.000124067	5.71e-05
d__Bacteria;p__Verrucomicrobiota;c__Verrucomicrobiae;o__Chthoniobacterales;f__01D2Z36;g__01D2Z36	0.00794258	0.00405423	0	0	0.0170621	0.00485953	0.00311543	0.0111624	0.0108056	0.00494076	0.0140502	0.0103617	0.00736283	0.00506702
d__Bacteria;p__Verrucomicrobiota;c__Verrucomicrobiae;o__Verrucomicrobiales;f__Verrucomicrobiaceae;g__uncultured	0.00565145	0.00256057	0.0180559	0.00105234	0.0255931	0.00647938	0.00900014	0.0110074	0.0120231	0.00598092	0.00399218	0.00262679	0.00220461	0.00137484
d__Bacteria;p__Proteobacteria;c__Alphaproteobacteria;o__Rhizobiales;f__Rhizobiaceae;g__Aureimonas	0.0149687	0.00576128	0.00407714	0.00105234	0.0374566	0	0.00640394	0.0110074	0.00258725	0.00104016	0.010218	0.00766386	0.00385396	0.00252791
d__Bacteria;p__Acidobacteriota;c__Acidobacteriae;o__Bryobacterales;f__Bryobacteraceae;g__Bryobacter	0.0065679	0.00874861	0.0084455	0.00210468	0.0234603	0.010259	0.00813474	0.0106973	0.0283076	0.00364056	0.042235	0.0336284	0.0465717	0.0376268
d__Bacteria;p__Bacteroidota;c__Bacteroidia;o__Chitinophagales;f__Chitinophagaceae;g__Rurimicrobium	0.00595694	0.00810847	0.00145612	0.00263085	0.00853104	0.010799	0.0297697	0.0105423	0.00974024	0.0104016	0.0549742	0.0458684	0.0117241	0.00827493
d__Bacteria;p__Actinobacteriota;c__Actinobacteria;o__Micrococcales;f__Promicromonosporaceae;g__Promicromonospora	0.0363526	0.0377684	0.00990162	0.084187	0.065449	0.0302371	0.00415391	0.0102322	0.165888	0.0124819	0.00218258	0.00142173	6.65e-06	2.18e-06
d__Bacteria;p__Acidobacteriota;c__Vicinamibacteria;o__Vicinamibacterales;f__Vicinamibacteraceae;g__Vicinamibacteraceae	0.00137468	0.00533452	0	0.00105234	0.00599838	0.00485953	0.00328851	0.0102322	0.0412438	0.00052008	0.00361557	0.00259838	0.000182259	9.01e-05
d__Bacteria;p__Proteobacteria;c__Gammaproteobacteria;o__Burkholderiales;f__Nitrosomonadaceae;g__Ellin6067	0.010081	0.0480107	0.000582448	0	0.0289255	0.020518	0.0100386	0.0102322	0.0805092	0.00832128	3.52e-05	1.76e-05	9.21e-08	1.68e-08
d__Bacteria;p__Proteobacteria;c__Alphaproteobacteria;o__Acetobacterales;f__Acetobacteraceae;g__Gluconacetobacter	0.0252024	0.00469437	0.0486344	0.00105234	0.0567847	0.0480554	0.0427506	0.0100772	0.194957	0.0135221	9.35e-06	4.41e-06	7.51e-08	1.27e-08
d__Bacteria;p__Verrucomicrobiota;c__Verrucomicrobiae;o__Chthoniobacterales;f__Chthoniobacteraceae;g__Candidatus_Udaeobacter	0.004735	0.00384085	0	0	0.00946412	0.0113389	0.00311543	0.00992214	0.0222199	0.0013002	0.00578353	0.00391967	0.00127855	0.000763468
d__Bacteria;p__Actinobacteriota;c__Actinobacteria;o__Streptomycetales;f__Streptomycetaceae;g__Streptacidiphilus	0.00977548	0.00234719	0.113286	0.0268346	0.00213276	0.0010799	0.0147118	0.00961208	0.0182629	0.0249639	0.00685411	0.005071	0.00308757	0.00213254
d__Bacteria;p__Proteobacteria;c__Gammaproteobacteria;o__Pseudomonadales;f__Moraxellaceae;g__Alkanindiges	0.000916452	0.00362747	0.0445573	0.00947104	0.0171954	0.00161984	0.000519239	0.00930201	0.00243506	0.0039006	0.000512343	0.000304715	0.000104908	4.86e-05
d__Bacteria;p__Bacteroidota;c__Bacteroidia;o__Chitinophagales;f__Saprospiraceae;g__uncultured	0.0134413	0.0219782	0	0	0.0158624	0.00323969	0.00484623	0.00930201	0.0462661	0.00156024	0.000493946	0.000277233	3.64e-05	1.57e-05
d__Bacteria;p__Planctomycetota;c__Planctomycetes;o__Gemmatales;f__Gemmataceae;g__uncultured	0.00274936	0.00170705	0	0	0.0141295	0.00917912	0.00744242	0.00899194	0.031047	0.00286044	0.0136482	0.00989071	0.00124818	0.000732721
d__Bacteria;p__Chloroflexi;c__Ktedonobacteria;o__Ktedonobacterales;f__JG30-KF-AS9;g__JG30-KF-AS9	0	0	0.000873673	0	0.00559849	0	0.00155772	0.00899194	0.0220677	0.00052008	0.0474646	0.0395398	0.0121787	0.00893
d__Bacteria;p__Proteobacteria;c__Alphaproteobacteria;o__Rhizobiales;f__Hyphomicrobiaceae;g__Hyphomicrobiaceae	0.00198565	0.00853523	0.000582448	0	0.0053319	0.00539948	0.000692318	0.00852684	0.016741	0.0013002	0.0134525	0.0097302	0.00348771	0.00230075
d__Bacteria;p__Actinobacteriota;c__Actinobacteria;o__Micrococcales;f__Microbacteriaceae;g__Agromyces	0.00168016	0.0172838	0.000873673	0.00105234	0.00573179	0.00377964	0.000346159	0.00821677	0.0382	0.00676104	0.00107571	0.000636286	0.000161228	7.88e-05
d__Bacteria;p__Myxococcota;c__Polyangia;o__mle1-27;f__mle1-27;g__mle1-27	0.000916452	0.00298733	0.000582448	0	0.0053319	0.0199781	0.00276927	0.00821677	0.0132406	0.00442068	0.0336681	0.0262079	0.0157117	0.0117088
d__Bacteria;p__Actinobacteriota;c__Actinobacteria;o__Kineosporiales;f__Kineosporiaceae;g__Angustibacter	0.00259661	0.0076817	0.000582448	0	0.0186616	0.00701932	0.00138464	0.00821677	0.0267857	0.00312048	0.00592084	0.00401014	0.000744043	0.000415441
d__Bacteria;p__Actinobacteriota;c__Actinobacteria;o__Kineosporiales;f__Kineosporiaceae;__	0.00504048	0.0155768	0	0	0.0179952	0.00215979	0.00553855	0.00775167	0.0599634	0.0013002	0.000637405	0.000362393	1.43e-05	5.56e-06
d__Bacteria;p__Actinobacteriota;c__Actinobacteria;o__Propionibacteriales;f__Nocardioidaceae;g__Kribbella	0.000458226	0.00426761	0	0.00105234	0.0693147	0.0010799	0.00225003	0.00759664	0.0439833	0.00598092	0.000368158	0.000194752	6.88e-05	3.02e-05
d__Bacteria;p__Actinobacteriota;c__Thermoleophilia;o__Gaiellales;f__Gaiellaceae;g__Gaiella	0.00259661	0.00789508	0.000582448	0	0.0103972	0.00269974	0.000692318	0.00759664	0.028612	0.0013002	0.00347683	0.00240087	0.000723064	0.000422436
d__Bacteria;p__Proteobacteria;c__Alphaproteobacteria;o__Sphingomonadales;f__Sphingomonadaceae;g__Altererythrobacter	0.00168016	0.00576128	0.00262102	0	0.0118635	0.00215979	0.00726934	0.00759664	0.016741	0.00286044	0.0409657	0.0333765	0.044686	0.036948
d__Bacteria;p__Proteobacteria;c__Alphaproteobacteria;o__Acetobacterales;f__Acetobacteraceae;g__Roseomonas	0.0537652	0.0102423	0.00378592	0.00526169	0.0139962	0.00755927	0.00484623	0.00744161	0.0123275	0.00208032	0.00119587	0.000710913	0.000387249	0.000194968
d__Bacteria;p__Actinobacteriota;c__Actinobacteria;o__Corynebacteriales;f__Nocardiaceae;__	0.052085	0.00896199	0.0326171	0.0226253	0.0303918	0.00269974	0.0114233	0.00728657	0.0016741	0.00598092	3.48e-06	1.41e-06	2.29e-07	4.63e-08
d__Bacteria;p__Proteobacteria;c__Gammaproteobacteria;o__Diplorickettsiales;f__Diplorickettsiaceae;g__uncultured	0.00488774	0.00192043	0.0288312	0.0257823	0.0235936	0.0140386	0.017308	0.00713154	0.0051745	0.0124819	0.0028174	0.00205362	9.23e-05	4.36e-05
d__Bacteria;p__Bacteroidota;c__Bacteroidia;o__Cytophagales;f__Spirosomaceae;g__Emticicia	0.000458226	0.0153634	0	0	0.0213276	0.00539948	0.0122886	0.00713154	0.0284598	0.00442068	7.21e-05	3.59e-05	2.74e-05	1.23e-05
d__Bacteria;p__Chloroflexi;c__Ktedonobacteria;o__C0119;f__C0119;g__C0119	0.00213839	0.0130162	0	0	0.00413222	0.00269974	0	0.00697651	0.0302861	0.0026004	0.000381137	0.000210778	1.65e-05	6.49e-06
d__Bacteria;p__Proteobacteria;c__Alphaproteobacteria;o__Rhodospirillales;f__Rhodospirillaceae;g__uncultured	0.000305484	0.00149366	0	0	0.000399892	0	0.000346159	0.00682147	0.00623984	0.00234036	0.0876029	0.0763695	0.0462505	0.0379027
d__Bacteria;p__Bacteroidota;c__Bacteroidia;o__Cytophagales;f__uncultured;g__uncultured	0.00687339	0.0288064	0.00524204	0	0.0211943	0.00377964	0.00519239	0.00666644	0.0473315	0.00572088	0.00922728	0.00649572	0.000809425	0.000453958
d__Bacteria;p__Actinobacteriota;c__Actinobacteria;o__Micrococcales;f__Microbacteriaceae;g__Frigoribacterium	0.0216894	0.00298733	0.00145612	0.00105234	0.00293254	0.00377964	0.00121156	0.00635637	0.00334821	0.0013002	0.0250719	0.0197293	0.0136976	0.00974123
d__Bacteria;p__Actinobacteriota;c__Actinobacteria;o__Pseudonocardiales;f__Pseudonocardiaceae;g__Pseudonocardia	0.0126776	0.00170705	0	0	0.0233271	0	0.00657702	0.00635637	0.0299817	0.0119618	0.0024409	0.00155097	0.000526299	0.000290622
d__Bacteria;p__Acidobacteriota;c__Vicinamibacteria;o__Subgroup_17;f__Subgroup_17;g__Subgroup_17	0.00213839	0.0055479	0	0	0.00226606	0.0010799	0.000865398	0.00604631	0.0162845	0	0.0187184	0.0140423	0.00314416	0.00200053
d__Bacteria;p__Myxococcota;c__Polyangia;o__Polyangiales;f__Polyangiaceae;__	0.00351306	0.0138697	0.0232979	0.0568263	0.0505197	0.0750528	0.0439622	0.00589127	0.055702	0.006501	1.18e-05	5.42e-06	1.43e-06	4.06e-07
d__Bacteria;p__Proteobacteria;c__Alphaproteobacteria;o__Azospirillales;f__Inquilinaceae;g__Inquilinus	0.00351306	0.00618804	0.00495081	0.00999721	0.0201279	0.0340167	0.0107309	0.00589127	0.00395697	0.00624096	0.0327031	0.0251432	0.0227484	0.0169016
d__Bacteria;p__Bacteroidota;c__Bacteroidia;o__Sphingobacteriales;f__Sphingobacteriaceae;__	0.0164961	0.0010669	0.00465959	0.00947104	0.00173287	0.00431958	0.00432699	0.00589127	0.00547888	0.00104016	0.0381903	0.0311011	0.020564	0.0154058
d__Bacteria;p__Proteobacteria;c__Alphaproteobacteria;o__Rhodobacterales;f__Rhodobacteraceae;g__Amaricoccus	0.00442952	0.00256057	0	0	0.0113303	0.00161984	0	0.00589127	0.0264813	0.00156024	0.00333576	0.0022287	0.000390565	0.000210835
d__Bacteria;p__Actinobacteriota;c__Actinobacteria;o__Corynebacteriales;f__Nocardiaceae;g__Williamsia	0.0193982	0.00704156	0.172114	0.0173636	0.0363902	0.00971907	0.00969245	0.00573624	0.0235896	0.00104016	3.09e-05	1.54e-05	9.7e-07	2.51e-07
d__Bacteria;p__Actinobacteriota;c__Actinobacteria;o__Frankiales;__;__	0.00259661	0.00938875	0.0317434	0.0068402	0.0297253	0.0113389	0.00726934	0.0055812	0.0149147	0.00442068	0.0130245	0.00907503	0.00233255	0.00143496
d__Bacteria;p__Patescibacteria;c__Saccharimonadia;o__Saccharimonadales;__;__	0.00412403	0.0480107	0.0110665	0.0147327	0.0438549	0.0356366	0.00623086	0.00542617	0.00593546	0.00832128	0.000381702	0.000213635	7.71e-06	2.73e-06
d__Bacteria;p__Bacteroidota;c__Bacteroidia;o__Cytophagales;f__Spirosomaceae;g__uncultured	0.0303956	0.0213381	0.0160173	0	0.0225273	0.0124188	0.010904	0.00542617	0.0141538	0.00338052	0.094792	0.0816991	0.0413953	0.0330641
d__Bacteria;p__Acidobacteriota;c__Vicinamibacteria;o__Vicinamibacterales;__;__	0.00152742	0.00405423	0	0	0.00706476	0	0.00103848	0.00542617	0.0508319	0.00442068	0.00302252	0.00209984	0.000185046	8.96e-05
d__Bacteria;p__Proteobacteria;c__Gammaproteobacteria;o__Burkholderiales;f__Oxalobacteraceae;g__Duganella	0.023675	0.0921805	0.326171	0.0815562	0.0511862	0.00701932	0.00207695	0.00527114	0.00365259	0.0104016	9.94e-07	4.09e-07	1.28e-07	2.28e-08
d__Bacteria;p__Proteobacteria;c__Alphaproteobacteria;o__Acetobacterales;f__Acetobacteraceae;g__uncultured	0.00840081	0.00960213	0.0317434	0.0152589	0.0521193	0.0248376	0.0271735	0.00527114	0.031047	0.0026004	0.00035656	0.000197685	3.1e-05	1.31e-05
d__Bacteria;p__Proteobacteria;c__Gammaproteobacteria;o__CCD24;f__CCD24;g__CCD24	0.00244387	0.00426761	0	0	0.00653157	0.00269974	0.00225003	0.00527114	0.0301339	0.00104016	0.0191957	0.0140182	0.00702302	0.0046781
d__Bacteria;p__Proteobacteria;c__Gammaproteobacteria;o__Salinisphaerales;f__Solimonadaceae;__	0.00152742	0	0.0157261	0.00473552	0.0191948	0.00863917	0.0157502	0.0051161	0.00304382	0.0039006	0.000906915	0.000562223	5.87e-05	2.56e-05
d__Bacteria;p__Acidobacteriota;c__Blastocatellia;o__Blastocatellales;f__Blastocatellaceae;g__Aridibacter	0.00106919	0.00640142	0	0	0.00773125	0.00269974	0.000346159	0.00496107	0.00943586	0.00104016	0.0366781	0.0292288	0.0289527	0.0230668
d__Bacteria;p__Actinobacteriota;c__Actinobacteria;o__Catenulisporales;f__Actinospicaceae;g__Actinospica	0.00840081	0.00682818	0.0224243	0.452505	0.00853104	0.00161984	0.00103848	0.00480604	0.00852271	0.00988153	0.000663192	0.000384997	0.00470901	0.00310066
d__Bacteria;p__Bacteroidota;c__Bacteroidia;o__Sphingobacteriales;f__AKYH767;g__AKYH767	0.000305484	0.00810847	0.0011649	0	0.00373233	0.00593943	0.00207695	0.00480604	0.0138494	0.00104016	0.106122	0.0915927	0.0480627	0.0387112
d__Bacteria;p__Abditibacteriota;c__Abditibacteria;o__Abditibacteriales;f__Abditibacteriaceae;g__Abditibacterium	0.00565145	0.00192043	0.0131051	0.00631403	0.0222607	0.0010799	0.00276927	0.004651	0.00684861	0.00546084	0.0930383	0.0790915	0.0376947	0.0298276
d__Bacteria;p__Proteobacteria;c__Gammaproteobacteria;o__Salinisphaerales;f__Solimonadaceae;g__Solimonas	0.000305484	0.000640142	0	0	0.000266595	0.000539948	0.00346159	0.004651	0	0.0013002	0.0741214	0.0625939	0.0440123	0.0360082
d__Bacteria;p__Actinobacteriota;c__Thermoleophilia;o__Solirubrobacterales;f__Solirubrobacteraceae;g__Patulibacter	0.00397129	0.000853523	0.0238804	0.00105234	0.00586509	0.00161984	0.000346159	0.00434094	0.00806614	0.00156024	0.0170307	0.0123294	0.00799701	0.00548399
d__Bacteria;p__Actinobacteriota;c__Actinobacteria;o__Micrococcales;f__Microbacteriaceae;g__Pseudoclavibacter	0.0169544	0.010669	0	0.00105234	0.00146627	0	0.000519239	0.00434094	0.00152191	0	0.0113255	0.0085202	0.00656187	0.00447522
d__Bacteria;p__Acidobacteriota;c__Acidobacteriae;o__Acidobacteriales;f__Acidobacteriaceae_(Subgroup_1);g__Terracidiphilus	0.000916452	0	0.0154349	0.0273608	0.00759795	0.00701932	0.00121156	0.0041859	0.0035004	0.00026004	0.0173824	0.0140794	0.0105376	0.00762359
d__Bacteria;p__Proteobacteria;c__Gammaproteobacteria;o__Burkholderiales;f__Nitrosomonadaceae;g__MND1	0.00152742	0.00234719	0	0	0.000933082	0	0	0.0041859	0.00943586	0	0.0694549	0.0576589	0.0319444	0.0255562
d__Bacteria;p__Acidobacteriota;c__Acidobacteriae;o__Solibacterales;f__Solibacteraceae;g__Candidatus_Solibacter	0.00122194	0.000853523	0.00815428	0.00420935	0.0051986	0	0.000346159	0.00403087	0.0112622	0.00182028	0.0756096	0.0652735	0.0194061	0.0146835
d__Bacteria;p__Bacteroidota;c__Bacteroidia;o__Chitinophagales;f__Chitinophagaceae;g__Parasediminibacterium	0.00717887	0.0206979	0.0122314	0	0.0542521	0.0118789	0.0273466	0.00403087	0.0348518	0.00624096	0.00278274	0.00192948	0.000111414	5.82e-05
d__Bacteria;p__Actinobacteriota;c__Actinobacteria;o__Micrococcales;f__Microbacteriaceae;g__Amnibacterium	0.00336032	0.00469437	0.0154349	0	0.0126633	0.00269974	0.00138464	0.00403087	0.0378956	0.0026004	0.00286853	0.00186463	8.9e-05	4.19e-05
d__Bacteria;p__Bacteroidota;c__Bacteroidia;o__Chitinophagales;f__Chitinophagaceae;g__Parafilimonas	0.00122194	0.00640142	0	0	0.0050653	0	0.000692318	0.00403087	0.0234375	0.00156024	0.0390848	0.031368	0.011611	0.00834811
d__Bacteria;p__Proteobacteria;c__Gammaproteobacteria;o__Enterobacterales;f__Yersiniaceae;g__Serratia	0.043226	0.114159	0.00145612	0.0136804	0.0135963	0.0010799	0.0115963	0.0037208	0.00623984	0.0449869	4.01e-06	1.73e-06	1.29e-07	2.36e-08
d__Bacteria;p__Acidobacteriota;c__Acidobacteriae;o__Subgroup_2;f__Subgroup_2;g__Subgroup_2	0.0029021	0.000640142	0	0	0.0158624	0.00269974	0.00501931	0.0037208	0.00928367	0	0.00670134	0.00447405	0.00297913	0.00186148
d__Bacteria;p__Actinobacteriota;c__Thermoleophilia;o__Solirubrobacterales;__;__	0.00198565	0.000426761	0	0	0.00346573	0	0.000692318	0.0037208	0.0226765	0.00182028	0.0322052	0.0247638	0.010282	0.00721842
d__Bacteria;p__Proteobacteria;c__Alphaproteobacteria;o__Rhizobiales;f__Beijerinckiaceae;g__Microvirga	0.00076371	0.00128028	0.000582448	0	0.01253	0.00323969	0.00415391	0.00356577	0.0171976	0.00156024	0.0477432	0.0383221	0.0150262	0.0110027
d__Bacteria;p__Verrucomicrobiota;c__Verrucomicrobiae;o__Pedosphaerales;f__Pedosphaeraceae;g__Pedosphaera	0	0	0.00553326	0.0231514	0.00613168	0.00269974	0.00605778	0.00341074	0.00273944	0.0026004	0.0165219	0.0128461	0.00616287	0.00427229
d__Bacteria;p__Actinobacteriota;c__Thermoleophilia;o__Solirubrobacterales;f__Solirubrobacteraceae;g__uncultured	0.0114556	0.0115226	0.00232979	0.00105234	0.0239935	0.0134987	0.00726934	0.00341074	0.00928367	0.00234036	0.022102	0.01704	0.00229167	0.00140461
d__Bacteria;p__Actinobacteriota;c__Actinobacteria;o__Propionibacteriales;__;__	0.00137468	0.0413959	0.0629044	0.0515646	0.011197	0.00863917	0.0135002	0.0032557	0.0051745	0.0124819	3.41e-05	1.84e-05	1.2e-07	2.27e-08
d__Bacteria;p__Verrucomicrobiota;c__Chlamydiae;o__Chlamydiales;__;__	0.00106919	0.00320071	0.00262102	0.0315701	0.000666487	0.00269974	0.00536547	0.0032557	0.00547888	0.00234036	0.0335723	0.0271999	0.0251811	0.0196161
d__Bacteria;p__Proteobacteria;c__Gammaproteobacteria;o__Pseudomonadales;f__Moraxellaceae;g__Acinetobacter	0.00122194	0.00362747	0	0.00157851	0.000666487	0.0010799	0	0.00310067	0.00121753	0.0478474	7.79e-05	3.59e-05	0.000304591	0.000155514
d__Bacteria;p__Bacteroidota;c__Bacteroidia;o__Cytophagales;f__Spirosomaceae;g__Arcicella	0.00106919	0.00448099	0.0279575	0	0.00786455	0.0253776	0.00467315	0.00294564	0.00395697	0.00572088	0.0150853	0.0108472	0.00566237	0.00375031
d__Bacteria;p__Proteobacteria;c__Gammaproteobacteria;o__Burkholderiales;f__Chitinimonadaceae;g__Chitinimonas	0.00198565	0.00426761	0	0	0.00119968	0	0.00467315	0.00294564	0.00197849	0.0104016	0.0728802	0.0613243	0.0432863	0.0353929
d__Bacteria;p__Actinobacteriota;c__Actinobacteria;o__Micrococcales;f__Microbacteriaceae;g__Diaminobutyricimonas	0.000610968	0	0.00786305	0.00263085	0.00053319	0.00161984	0.00138464	0.0027906	0.0245028	0.0013002	0.00359561	0.00249219	0.000846041	0.000493639
d__Bacteria;p__Deferribacterota;c__Deferribacteres;o__Deferribacterales;f__Deferribacteraceae;g__Calditerrivibrio	0.0119139	0.0010669	0.000873673	0	0.004932	0.00863917	0.00121156	0.00263557	0.00258725	0.00234036	0.083309	0.0723595	0.0348847	0.0274651
d__Bacteria;p__Proteobacteria;c__Alphaproteobacteria;o__Acetobacterales;f__Acetobacteraceae;g__Acidiphilium	0.0166489	0.0258191	0.0556238	0.0689281	0.0381231	0.0464355	0.0765012	0.00248054	0.00426135	0.00728112	1.35e-05	5.99e-06	7.36e-07	1.84e-07
d__Bacteria;p__Proteobacteria;c__Gammaproteobacteria;o__WD260;f__WD260;g__WD260	0.00824807	0.00917537	0.0990162	0.0489337	0.04932	0.0615541	0.0176541	0.00248054	0.00974024	0.0039006	2.86e-09	7.54e-10	1.38e-09	6.5e-11
d__Bacteria;p__Actinobacteriota;c__Actinobacteria;o__Frankiales;f__Geodermatophilaceae;g__Modestobacter	0.00198565	0.000426761	0.0011649	0.00105234	0.00399892	0	0.000865398	0.00248054	0.0199371	0	0.0963792	0.0831285	0.041805	0.0334367
d__Bacteria;p__Planctomycetota;c__OM190;o__OM190;f__OM190;g__OM190	0.00076371	0.000426761	0	0	0.00546519	0	0	0.0023255	0.00943586	0	0.115671	0.102426	0.0393032	0.0315739
d__Bacteria;p__Bacteroidota;c__Bacteroidia;o__Chitinophagales;f__Chitinophagaceae;g__Heliimonas	0.00076371	0.00277395	0.0247541	0.0163112	0.0050653	0.000539948	0.00432699	0.00217047	0.000760956	0.00078012	0.000958184	0.000606804	0.000187175	9.36e-05
d__Bacteria;p__Bacteroidota;c__Bacteroidia;o__Cytophagales;f__Cytophagaceae;g__Siphonobacter	0.00412403	0.00405423	0.0177647	0.00105234	0.0231938	0.010259	0.0140194	0.00217047	0.00958805	0.00546084	0.0323229	0.0251115	0.0083819	0.00578087
d__Bacteria;p__Proteobacteria;c__Gammaproteobacteria;o__Salinisphaerales;f__Solimonadaceae;g__Alkanibacter	0.000305484	0.0010669	0.0180559	0.00947104	0.00373233	0.00269974	0.000865398	0.00201544	0.00289163	0.00104016	0.0141372	0.0105631	0.00780153	0.00545165
d__Bacteria;p__Actinobacteriota;c__Thermoleophilia;o__Gaiellales;__;__	0.00213839	0.00234719	0	0	0.0237269	0.0010799	0.00363467	0.0018604	0.0366781	0.0013002	0.000737903	0.000396587	9.73e-05	4.4e-05
d__Bacteria;p__Proteobacteria;c__Gammaproteobacteria;o__Enterobacterales;f__Erwiniaceae;g__Pantoea	0.00870629	0.0416092	0.0136875	0.00420935	0.00146627	0.00161984	0.000346159	0.00170537	0.00121753	0.0244438	0.000177049	9.18e-05	8.76e-05	4.01e-05
d__Bacteria;p__Bacteroidota;c__Bacteroidia;o__Chitinophagales;__;__	0.000458226	0	0.00990162	0.00105234	0.000666487	0.0010799	0.000865398	0.00170537	0.000304382	0.00104016	0.0290607	0.0236138	0.0112108	0.00821584
d__Bacteria;p__Proteobacteria;c__Gammaproteobacteria;o__Burkholderiales;f__Nitrosomonadaceae;g__mle1-7	0.00198565	0.00490776	0	0	0.0123967	0	0.00259619	0.00170537	0.0311992	0.00156024	0.00130092	0.000776422	0.000147182	7.08e-05
d__Bacteria;p__Verrucomicrobiota;c__Verrucomicrobiae;o__Chthoniobacterales;f__Chthoniobacteraceae;__	0	0.00576128	0.0372767	0.00947104	0.00639828	0.0010799	0.0176541	0.00155033	0.00578327	0.00078012	0.000270521	0.000144871	2.65e-05	1.13e-05
d__Bacteria;p__Proteobacteria;c__Alphaproteobacteria;o__Rhodobacterales;f__Rhodobacteraceae;g__Falsirhodobacter	0.0158852	0.000853523	0.00174735	0	0.00133297	0	0	0.00155033	0.00273944	0.0013002	0.0401794	0.0319042	0.0324216	0.0250773
d__Bacteria;p__Proteobacteria;c__Alphaproteobacteria;o__Acetobacterales;f__Acetobacteraceae;g__Rhodovastum	0.00412403	0.00149366	0.00582448	0.0173636	0.0282591	0.0156585	0.0193849	0.0013953	0.00547888	0.0039006	0.0028271	0.00186974	0.000258427	0.000135876
d__Bacteria;p__Proteobacteria;c__Alphaproteobacteria;o__Elsterales;f__uncultured;g__uncultured	0.000305484	0	0.0291224	0.0084187	0.0141295	0.00377964	0.00155772	0.0013953	0.00943586	0.0013002	0.000197935	0.000118553	9.52e-06	3.52e-06
d__Bacteria;p__Bacteroidota;c__Bacteroidia;o__Chitinophagales;f__Chitinophagaceae;g__Parasegetibacter	0.00962274	0.0066148	0.00436836	0	0.000666487	0.00809922	0.000519239	0.0013953	0.00273944	0.00494076	0.0225727	0.0174938	0.0112536	0.007952
d__Bacteria;p__Verrucomicrobiota;c__Verrucomicrobiae;o__Chthoniobacterales;f__Chthoniobacteraceae;g__LD29	0.00168016	0.00128028	0.000582448	0	0.0191948	0.00269974	0.0017308	0.0013953	0.00121753	0.00312048	0.06464	0.0530885	0.0322441	0.0248611
d__Bacteria;p__Proteobacteria;c__Alphaproteobacteria;o__Azospirillales;f__Azospirillaceae;g__Skermanella	0.000305484	0.000426761	0.00291224	0	0.00479871	0	0	0.0013953	0.00958805	0	0.0845708	0.0728304	0.0452655	0.0372914
d__Bacteria;p__Proteobacteria;c__Gammaproteobacteria;o__Salinisphaerales;f__Solimonadaceae;g__Nevskia	0.000916452	0.000853523	0.0084455	0.0147327	0.00586509	0.00269974	0.00865398	0.00124027	0.00319602	0.0026004	0.00694073	0.00489718	0.00252102	0.0015927
d__Bacteria;p__Proteobacteria;c__Alphaproteobacteria;o__Rhizobiales;f__Devosiaceae;g__Pelagibacterium	0.0171071	0.00832185	0.000582448	0.00105234	0.00413222	0	0.000865398	0.00124027	0.00228287	0.0013002	0.0519422	0.0428226	0.0287445	0.0222377
d__Bacteria;p__Proteobacteria;c__Alphaproteobacteria;o__Micavibrionales;f__Micavibrionaceae;g__uncultured	0.00137468	0.00170705	0	0	0	0	0.00830782	0.00124027	0	0.00052008	0.015481	0.0115545	0.00793937	0.00553668
d__Bacteria;p__Proteobacteria;c__Gammaproteobacteria;o__Burkholderiales;__;__	0.00122194	0.00298733	0.0151437	0.00789254	0.0127966	0.0167384	0.00328851	0.00108523	0.020698	0.0187229	0.00162492	0.0010194	0.000244456	0.000126334
d__Bacteria;p__Actinobacteriota;c__Actinobacteria;o__Micrococcales;f__Microbacteriaceae;g__Leifsonia	0.00076371	0	0	0	0.00399892	0.00161984	0.00103848	0.00108523	0.0184151	0	0.0728491	0.0622477	0.0291996	0.0226574
d__Bacteria;p__Actinobacteriota;c__Actinobacteria;o__Micrococcales;f__Microbacteriaceae;g__Rathayibacter	0.00534597	0.0055479	0.00145612	0	0.000799785	0	0	0.00108523	0.000456574	0	0.0244334	0.0189196	0.0121662	0.0091279
d__Bacteria;p__Bdellovibrionota;c__Oligoflexia;o__Oligoflexales;f__uncultured;g__uncultured	0.00076371	0.00384085	0.039024	0.0363057	0.014796	0.0151185	0.0105579	0.000930201	0.0105012	0.00702108	0.00164984	0.00108367	0.000188657	9.8e-05
d__Bacteria;p__Proteobacteria;c__Alphaproteobacteria;o__Rhodobacterales;f__Rhodobacteraceae;__	0.0018329	0.00576128	0	0	0.00759795	0	0.000346159	0.000930201	0.0170454	0.0013002	0.0436984	0.035883	0.0163161	0.0121708
d__Bacteria;p__Proteobacteria;c__Alphaproteobacteria;o__Rhizobiales;f__Beijerinckiaceae;g__Camelimonas	0	0	0.000873673	0	0.00053319	0	0.000519239	0.000930201	0.00639203	0.00312048	0.0638633	0.0530613	0.043686	0.0355957
d__Bacteria;p__Proteobacteria;c__Gammaproteobacteria;o__Burkholderiales;f__Burkholderiaceae;__	0.00366581	0.00682818	0.0401889	0.166269	0.0351905	0.0280773	0.0315005	0.000775167	0.0109578	0.00546084	5.97e-05	3.16e-05	8.85e-06	3.15e-06
d__Bacteria;p__Actinobacteriota;c__Actinobacteria;o__Micrococcales;f__Cellulomonadaceae;g__Oerskovia	0	0.000213381	0.000291224	0	0.00213276	0	0.00276927	0.000775167	0.0187195	0	0.0139272	0.0100417	0.00309424	0.00193282
d__Bacteria;p__Proteobacteria;c__Gammaproteobacteria;o__Burkholderiales;f__Oxalobacteraceae;g__Herminiimonas	0.0120666	0.000426761	0.0366943	0.031044	0.00133297	0.000539948	0	0.000620134	0	0.0039006	0.000115277	6.45e-05	3.04e-05	1.31e-05
d__Bacteria;p__Bacteroidota;c__Bacteroidia;o__Chitinophagales;f__uncultured;g__uncultured	0.00168016	0	0.0119402	0.00473552	0.00626498	0.00161984	0.00155772	0.000620134	0	0	0.0124694	0.00940429	0.00430953	0.00286108
d__Bacteria;p__Actinobacteriota;c__Actinobacteria;o__Frankiales;f__Geodermatophilaceae;__	0.000458226	0	0	0	0.00133297	0.00431958	0	0.000620134	0.0108056	0	0.0709081	0.058957	0.0391521	0.0310694
d__Bacteria;p__Proteobacteria;c__Alphaproteobacteria;o__Azospirillales;f__Azospirillaceae;g__Nitrospirillum	0	0.0010669	0.00815428	0	0	0.00269974	0.0188657	0.000620134	0.00213068	0.00234036	0.0241309	0.0195294	0.0162752	0.0125966
d__Bacteria;p__Proteobacteria;c__Gammaproteobacteria;o__Burkholderiales;f__Alcaligenaceae;g__Pigmentiphaga	0.0394074	0.0066148	0.0227155	0.00210468	0.00466541	0	0.00605778	0.0004651	0.000760956	0.00624096	9.22e-07	3.1e-07	4.08e-07	9.41e-08
d__Bacteria;p__Bacteroidota;c__Bacteroidia;o__Chitinophagales;f__Chitinophagaceae;g__Chitinophagaceae	0	0	0.00873673	0.00947104	0.00053319	0.0010799	0.00103848	0.000310067	0	0.00052008	0.0302361	0.0250755	0.0211355	0.0169359
d__Bacteria;p__Bacteroidota;c__Bacteroidia;o__Chitinophagales;f__Chitinophagaceae;g__Arachidicoccus	0	0	0.00669816	0.00473552	0.00266595	0.0010799	0.000346159	0.000310067	0.000456574	0	0.0412385	0.0351368	0.0220888	0.0176896
d__Bacteria;p__Proteobacteria;__;__;__;__	0.00168016	0.000640142	0.0442661	0.00105234	0.00173287	0	0.00103848	0.000310067	0	0.00078012	0.000212392	0.00010558	0.000711969	0.000389105
d__Bacteria;p__Actinobacteriota;c__Actinobacteria;o__Frankiales;f__Sporichthyaceae;g__Candidatus_Planktophila	0	0.00682818	0.0011649	0	0.00226606	0.0259175	0.000346159	0.000310067	0.00426135	0.00104016	0.0192471	0.0147441	0.00762938	0.00525818
d__Bacteria;p__Verrucomicrobiota;c__Chlamydiae;o__Chlamydiales;f__Parachlamydiaceae;g__uncultured	0.00213839	0.00448099	0.00262102	0	0.0115969	0.0145786	0.0275196	0.000310067	0.00791394	0.00468072	0.087464	0.0752867	0.0443178	0.035652
d__Bacteria;p__Bacteroidota;c__Bacteroidia;o__Cytophagales;f__Spirosomaceae;__	0	0.000426761	0	0	0.0103972	0	0.000865398	0.000310067	0.00745737	0.0013002	0.0360645	0.0291159	0.0115261	0.00850273
d__Bacteria;p__Firmicutes;c__Bacilli;o__Alicyclobacillales;f__Alicyclobacillaceae;g__Tumebacillus	0.000305484	0	0	0	0.00639828	0	0.00103848	0.000310067	0.0146104	0.00052008	0.0461056	0.0371973	0.0226003	0.0173961
d__Bacteria;p__Actinobacteriota;c__Actinobacteria;o__Micrococcales;f__Cellulomonadaceae;__	0.0116084	0.00618804	0.0125226	0.00631403	0.000399892	0.00323969	0.00103848	0.000155033	0	0.00364056	0.00123197	0.000773384	0.00050479	0.000290178
d__Bacteria;p__Elusimicrobiota;c__Elusimicrobia;o__Lineage_IV;f__Lineage_IV;g__Lineage_IV	0.000305484	0	0.0186384	0.0368318	0.000266595	0.010259	0.0133271	0	0.000304382	0	1.11e-07	3.76e-08	1.09e-07	2.09e-08
d__Bacteria;p__Actinobacteriota;c__Actinobacteria;o__Streptomycetales;f__Streptomycetaceae;__	0.000305484	0.000426761	0.0495081	0.0126281	0	0	0.00432699	0	0	0.0104016	0.00421082	0.00315316	0.00329958	0.00236335
d__Bacteria;p__Verrucomicrobiota;c__Verrucomicrobiae;o__Chthoniobacterales;__;__	0	0	0.0119402	0.00894487	0.000266595	0	0	0	0	0	0.00364506	0.0025798	0.00419347	0.00301935
d__Bacteria;p__Proteobacteria;c__Alphaproteobacteria;o__Elsterales;__;__	0.000305484	0.000426761	0.0113577	0.0084187	0.00946412	0	0.00121156	0	0.00593546	0.00182028	0.0530413	0.0449011	0.0212819	0.016289
d__Bacteria;p__Proteobacteria;c__Alphaproteobacteria;o__Acetobacterales;f__Acetobacteraceae;g__Acetobacteraceae	0.00229113	0.000426761	0	0.00789254	0.00239935	0.00215979	0.00467315	0	0.00228287	0.00156024	0.0662795	0.0565228	0.0426953	0.0356035
d__Bacteria;p__Actinobacteriota;c__Actinobacteria;o__Propionibacteriales;f__Nocardioidaceae;__	0.00672065	0	0.0215506	0.00526169	0	0.00269974	0.000692318	0	0.00563108	0.00156024	0.0274999	0.0227636	0.0132233	0.0100565
d__Bacteria;p__Actinobacteriota;c__Actinobacteria;o__Micrococcales;f__Microbacteriaceae;g__Microbacteriaceae	0.0192455	0.0149366	0.00262102	0.00263085	0.000266595	0.000539948	0.00017308	0	0	0	0.00166587	0.00113711	0.000542295	0.000299019
d__Bacteria;p__Myxococcota;c__Myxococcia;o__Myxococcales;f__Myxococcaceae;g__Myxococcus	0	0.000640142	0.019512	0.00210468	0.00239935	0.00269974	0.000519239	0	0.0070008	0	0.00419195	0.00274493	0.00348789	0.00223602
d__Bacteria;p__Proteobacteria;c__Alphaproteobacteria;o__Tistrellales;f__Geminicoccaceae;g__Candidatus_Alysiosphaera	0.000305484	0	0	0	0.00399892	0	0	0	0.00897928	0.00104016	0.0509084	0.0433367	0.0137856	0.0102944
d__Bacteria;p__Actinobacteriota;c__Actinobacteria;o__Micrococcales;f__Microbacteriaceae;g__Glaciihabitans	0.00122194	0.0789508	0.0157261	0	0.00173287	0	0	0	0.000913147	0	3.09e-05	1.37e-05	0.00029473	0.000150388
d__Bacteria;p__Actinobacteriota;c__Actinobacteria;o__Streptosporangiales;f__Nocardiopsaceae;g__Nocardiopsis	0.00458226	0.00213381	0	0	0.00053319	0	0	0	0.021459	0.0039006	0.00360138	0.00234216	0.000803233	0.000464139
d__Bacteria;p__Proteobacteria;c__Gammaproteobacteria;o__Burkholderiales;f__Oxalobacteraceae;g__Oxalicibacterium	0.0203147	0.00234719	0	0	0.000266595	0	0	0	0.000760956	0	0.00434125	0.00293715	0.00766353	0.00558296
d__Bacteria;p__Actinobacteriota;c__Actinobacteria;o__Micrococcales;f__Micrococcaceae;g__Paeniglutamicibacter	0	0.0166437	0.000582448	0	0	0	0	0	0	0	0.00719009	0.00561421	0.00347819	0.0023013

## Sheet: Table_S9
Table S9. Sequencing data processing statistics
SampleID	Type	Rootstock	ITS, Reads, high quality	ITS, Depth after deblur	ITS, final depth	ITS samples in analysis	16S rRNA, Reads, high quality	16S rRNA, Depth after deblur	16S rRNA, final depth	16S rRNA samples in analysis
1AR	Mature root	M26	285122	193767	191820	Yes	108173	45734	37606	Yes
1DR	Mature root	M26	93634	58028	54897	Yes	42776	24158	18722	Yes
2AR	Mature root	M26	271259	203251	199662	Yes	151320	69978	58845	Yes
2DR	Mature root	M26	215540	139988	135613	Yes	103885	57281	50331	Yes
3AR	Mature root	M26	278091	211043	207217	Yes	121664	52147	46269	Yes
3DR	Mature root	M26	212424	154523	152951	Yes	68596	37920	32815	Yes
4AR	Mature root	M26	350097	209743	207349	Yes	133653	57889	47550	Yes
4DR	Mature root	M26	348366	228880	224723	Yes	53738	28392	23332	Yes
5AR	Mature root	M26	177864	126652	123326	Yes	90212	37087	31457	Yes
5DR	Mature root	M26	386284	260807	240150	Yes	133096	72261	64536	Yes
6AR	Mature root	M26	204974	142497	139557	Yes	55256	24008	19097	Yes
6DR	Mature root	M26	287830	197387	195567	Yes	80150	45013	40471	Yes
1BR	Mature root	M11	208654	162817	159946	Yes	57491	24788	20179	Yes
1CR	Mature root	M11	215469	150454	146557	Yes	76746	33369	28392	Yes
1ER	Mature root	M11	221680	163335	161746	Yes	65410	34098	28340	Yes
1FR	Mature root	M11	303081	209484	207381	Yes	146312	77528	70349	Yes
2BR	Mature root	M11	363886	280032	277245	Yes	89518	37140	31067	Yes
2CR	Mature root	M11	166048	122666	120761	Yes	76380	32495	27028	Yes
2ER	Mature root	M11	84593	45481	44259	Yes	100102	48348	44059	Yes
2FR	Mature root	M11	254857	168726	167709	Yes	99258	55430	47304	Yes
3BR	Mature root	M11	188385	142366	137680	Yes	107321	49942	44046	Yes
3CR	Mature root	M11	190095	137410	135397	Yes	90846	38427	30679	Yes
3ER	Mature root	M11	225477	157546	155464	Yes	56517	32023	27826	Yes
3FR	Mature root	M11	162068	103703	101363	Yes	46345	25954	23305	Yes
4BR	Mature root	M11	185227	142993	141559	Yes	98038	45367	38968	Yes
4CR	Mature root	M11	256553	188686	186531	Yes	90627	38861	31809	Yes
4ER	Mature root	M11	130441	86588	84789	Yes	73763	41983	35733	Yes
4FR	Mature root	M11	260998	182716	180945	Yes	94317	50559	41843	Yes
5BR	Mature root	M11	189872	145143	142042	Yes	73676	33667	29020	Yes
5CR	Mature root	M11	364498	272536	269563	Yes	148284	64681	56785	Yes
5ER	Mature root	M11	657851	496101	489317	Yes	61194	34265	29229	Yes
5FR	Mature root	M11	174221	123947	122137	Yes	59850	34805	30997	Yes
6BR	Mature root	M11	292096	233345	231113	Yes	76229	32856	27495	Yes
6CR	Mature root	M11	141385	94259	91282	Yes	125555	52884	44352	Yes
6ER	Mature root	M11	708186	496379	489125	Yes	65739	36364	31376	Yes
6FR	Mature root	M11	94547	64382	63337	Yes	42396	21599	19724	Yes
BUD-1	Root stock	Bud118	122355	76668	75335	Yes	126601	71552	63203	Yes
BUD-10	Root stock	Bud118	127673	79623	78557	Yes	157872	81960	61429	Yes
BUD-2	Root stock	Bud118	110136	67237	64671	Yes	216273	117077	103244	Yes
BUD-3	Root stock	Bud118	132644	85103	82988	Yes	118346	62614	55140	Yes
BUD-4	Root stock	Bud118	211202	128721	127243	Yes	161895	81811	72018	Yes
BUD-5	Root stock	Bud118	211352	135930	133855	Yes	206431	101301	83889	Yes
BUD-6	Root stock	Bud118	138860	82962	79231	Yes	128741	70983	52373	Yes
BUD-7	Root stock	Bud118	147755	90247	87008	Yes	149256	80662	63659	Yes
BUD-8	Root stock	Bud118	73143	47276	45960	Yes	127753	71361	60443	Yes
BUD-9	Root stock	Bud118	145484	82386	80109	Yes	99850	55745	39301	Yes
G210-1	Root stock	G210	80240	46068	39418	Yes	117844	60355	49879	Yes
G210-10	Root stock	G210	43625	26253	24862	Yes	49509	25741	18246	Yes
G210-2	Root stock	G210	31882	18211	17046	Yes	75246	38498	24778	Yes
G210-3	Root stock	G210	30292	16601	14259	Yes	104421	51076	32058	Yes
G210-4	Root stock	G210	56598	30903	28692	Yes	125080	61493	42674	Yes
G210-5	Root stock	G210	19637	11919	10786	Yes	73994	28587	24422	Yes
G210-6	Root stock	G210	65211	27284	26091	Yes	177749	78658	67565	Yes
G210-7	Root stock	G210	58221	33015	30324	Yes	198248	97782	74346	Yes
G210-8	Root stock	G210	38633	22144	20495	Yes	132729	70149	37245	Yes
G210-9	Root stock	G210	167142	91688	86221	Yes	270282	129933	97433	Yes
G214-1	Root stock	G214	112897	67300	63147	Yes	118557	67096	37739	Yes
G214-10	Root stock	G214	217061	128375	124057	Yes	78166	38845	33059	Yes
G214-2	Root stock	G214	115614	64936	62505	Yes	95551	51788	40649	Yes
G214-3	Root stock	G214	291898	172437	167567	Yes	93930	48053	38530	Yes
G214-4	Root stock	G214	186925	99832	96648	Yes	100029	50745	41413	Yes
G214-5	Root stock	G214	577903	332419	301386	Yes	258573	141553	89379	Yes
G214-6	Root stock	G214	90961	52254	46337	Yes	78861	43345	25590	Yes
G214-7	Root stock	G214	6702	3537	3195	No	1557	788	423	No
G214-8	Root stock	G214	17706	9947	9027	Yes	6179	3297	2021	No
G214-9	Root stock	G214	195424	121128	114803	Yes	103420	56377	37019	Yes
G890-1	Root stock	G890	138772	81462	73432	Yes	181788	95009	58802	Yes
G890-10	Root stock	G890	154289	90258	84976	Yes	169812	84529	67198	Yes
G890-2	Root stock	G890	139472	78086	69041	Yes	185902	100091	61234	Yes
G890-3	Root stock	G890	180635	103130	89072	Yes	206104	95789	84882	Yes
G890-4	Root stock	G890	271616	163688	145582	Yes	124597	59590	49343	Yes
G890-5	Root stock	G890	139250	80326	68067	Yes	172985	86320	75206	Yes
G890-6	Root stock	G890	183678	104575	98867	Yes	217792	107886	86897	Yes
G890-7	Root stock	G890	103935	62726	58911	Yes	123816	62883	49774	Yes
G890-8	Root stock	G890	209674	120157	116569	Yes	289903	141042	124234	Yes
G890-9	Root stock	G890	169464	102998	98503	Yes	237589	115594	92632	Yes
G935-1	Root stock	G935	61507	33475	31793	Yes	93759	51892	32763	Yes
G935-10	Root stock	G935	40575	22840	20871	Yes	32681	18016	11327	Yes
G935-2	Root stock	G935	9980	5474	5186	No	22962	12535	8384	Yes
G935-3	Root stock	G935	13657	7421	6634	Yes	162267	94208	49762	Yes
G935-4	Root stock	G935	58643	31151	29592	Yes	93324	51746	37576	Yes
G935-5	Root stock	G935	14657	8770	8298	Yes	23557	12896	9132	Yes
G935-6	Root stock	G935	20839	13542	12275	Yes	9024	4412	2862	No
G935-7	Root stock	G935	5446	3391	2811	No	3011	1455	952	No
G935-8	Root stock	G935	65543	38377	35164	Yes	49342	27479	18504	Yes
G935-9	Root stock	G935	16370	9804	8810	Yes	43582	24274	17755	Yes
G969-1	Root stock	G969	38846	21287	16426	Yes	46600	28328	14764	Yes
G969-10	Root stock	G969	21785	12804	12050	Yes	33635	19356	11622	Yes
G969-2	Root stock	G969	20487	11350	10540	Yes	22847	13241	9171	Yes
G969-3	Root stock	G969	32262	18459	16846	Yes	36153	20872	15265	Yes
G969-4	Root stock	G969	12712	7143	6398	Yes	39292	24021	16466	Yes
G969-5	Root stock	G969	49987	30167	27094	Yes	49678	30281	16351	Yes
G969-6	Root stock	G969	36402	20233	17624	Yes	24419	14318	9331	Yes
G969-7	Root stock	G969	26770	14741	12806	Yes	35636	18323	12442	Yes
G969-8	Root stock	G969	99360	55233	44534	Yes	129507	79540	34223	Yes
G969-9	Root stock	G969	112124	69324	66230	Yes	109272	61050	50418	Yes
G41-1	Root stock	G41	94293	58384	56266	Yes	187708	96482	84164	Yes
G41-10	Root stock	G41	100075	57093	54498	Yes	77768	45503	41268	Yes
G41-2	Root stock	G41	118441	67701	65887	Yes	132396	69226	60302	Yes
G41-3	Root stock	G41	190065	116900	112399	Yes	140625	76569	66937	Yes
G41-4	Root stock	G41	43378	26893	26116	Yes	58214	32564	28948	Yes
G41-5	Root stock	G41	128498	77539	68083	Yes	172477	99818	92064	Yes
G41-6	Root stock	G41	123575	76023	72533	Yes	117042	64937	55204	Yes
G41-7	Root stock	G41	104921	53029	51410	Yes	137288	69629	60877	Yes
G41-8	Root stock	G41	176229	107148	103519	Yes	106877	58583	51016	Yes
G41-9	Root stock	G41	34926	17321	16863	Yes	104704	41038	36989	Yes
M26-1	Root stock	M26	224860	141176	137862	Yes	196834	100537	70031	Yes
M26-10	Root stock	M26	82459	46650	46028	Yes	80293	40299	20049	Yes
M26-2	Root stock	M26	107881	68128	66562	Yes	153238	78149	56552	Yes
M26-3	Root stock	M26	166867	103725	102377	Yes	143610	76965	69624	Yes
M26-4	Root stock	M26	89564	49522	47785	Yes	191896	98070	72318	Yes
M26-5	Root stock	M26	87179	53011	50561	Yes	69490	36952	31368	Yes
M26-6	Root stock	M26	128175	79439	77241	Yes	159488	82176	64431	Yes
M26-7	Root stock	M26	169391	105182	101786	Yes	252243	125937	95861	Yes
M26-8	Root stock	M26	151863	87712	85273	Yes	215553	108361	92294	Yes
M26-9	Root stock	M26	156239	95133	92237	Yes	182196	88673	72494	Yes
PAJAM2-1	Root stock	Pajam-02	196431	123030	118556	Yes	189790	94988	71629	Yes
PAJAM2-10	Root stock	Pajam-02	110449	65623	61960	Yes	123378	65948	43471	Yes
PAJAM2-2	Root stock	Pajam-02	197188	120781	117385	Yes	210496	112398	92981	Yes
PAJAM2-3	Root stock	Pajam-02	128646	78808	75623	Yes	146663	76731	59335	Yes
PAJAM2-4	Root stock	Pajam-02	107590	60049	57550	Yes	147405	75251	59077	Yes
PAJAM2-5	Root stock	Pajam-02	164948	100426	86900	Yes	184847	99444	77776	Yes
PAJAM2-6	Root stock	Pajam-02	176779	106741	103137	Yes	251345	133182	84409	Yes
PAJAM2-7	Root stock	Pajam-02	86051	50926	49682	Yes	147582	77719	62843	Yes
PAJAM2-8	Root stock	Pajam-02	98865	61364	59163	Yes	109130	61934	45741	Yes
PAJAM2-9	Root stock	Pajam-02	127676	77007	73221	Yes	142791	73407	59806	Yes
SUP-1	Root stock	Supporter	68958	40813	38328	Yes	121476	66523	33810	Yes
SUP-10	Root stock	Supporter	111764	66074	57762	Yes	145330	81149	37645	Yes
SUP-2	Root stock	Supporter	94482	57684	52968	Yes	164986	97407	44885	Yes
SUP-3	Root stock	Supporter	147767	93156	87206	Yes	153911	89933	36179	Yes
SUP-4	Root stock	Supporter	46882	27600	25171	Yes	72644	40314	17680	Yes
SUP-5	Root stock	Supporter	138676	83229	70972	Yes	226092	125343	53133	Yes
SUP-6	Root stock	Supporter	92110	51035	47152	Yes	163806	88651	47416	Yes
SUP-7	Root stock	Supporter	102211	60890	52853	Yes	125667	75322	30054	Yes
SUP-8	Root stock	Supporter	67342	39207	36930	Yes	107149	55508	38012	Yes
SUP-9	Root stock	Supporter	95549	59233	54766	Yes	132143	69594	45742	Yes
